# Supplementary material
Source: publisher figshare collection journal article supplement (https://rs.figshare.com/ndownloader/files/12866312)
Supplement: Supplementary file 1 [file 12866312]

## Sheet: CHIKV
			Enforcement using				Enforcement using				Enforcement using randomly generated BOFs using uniform				Enforcement using randomly generated BOFs using
Enforcement using original CHIKV sequence			point mutated (1 to 10 mutations) CHIKV sequences				point mutated (1-genome length mutations) CHIKV sequences				distributions centred around individual CHIKV stoichiometric coefficients				uniform distribution centered around average CHIKV stoichiometric coefficient value
Model Reaction ID	%of original virus optima		Model Reaction ID	<%of original virus optima>	StdDev		Model Reaction ID	<%of original virus optima>	StdDev		Model Reaction ID	<%of original virus optima>	StdDev		Model Reaction ID	<%of original virus optima>	StdDev
EX_ile-L(e)	0		EX_ile-L(e)	0	0		sink_Tyr-ggn	0	0		sink_Tyr-ggn	0	0		sink_Tyr-ggn	0	0
EX_lys-L(e)	0		EX_lys-L(e)	0	0		EX_lys-L(e)	0.196772	4.39554		EX_lys-L(e)	17.9681	37.3239		EX_lys-L(e)	3.11975	17.1586
ILEtec	0		ILEtec	0	0		EX_ile-L(e)	3.42663	17.9963		EX_ile-L(e)	22.9416	39.5273		EX_ile-L(e)	20.1769	38.2955
sink_Tyr-ggn	0		sink_Tyr-ggn	0	0		ILEtec	3.49999	18.3779		ILEtec	24.9482	42.9509		ILEtec	21.7187	41.1586
GK1	50		GK1	50	1.94494e-09		GK1	49.9125	0.597963		GK1	47.7559	4.74733		GK1	49.066	3.31614
CTPS1	73.6199		CTPS1	73.6175	0.324876		CTPS1	78.0092	11.1472		CTPS1	81.9263	17.1689		EX_pi(e)	65.2852	12.3077
GMPS2	82.6922		GMPS2	82.6879	0.117587		EX_trp-L(e)	79.3342	9.94065		GMPS2	87.5112	12.6456		CTPS1	68.9584	19.8579
IMPD	82.6922		IMPD	82.6879	0.117587		5HLTDL	79.3342	9.94065		IMPD	87.5112	12.6456		PRPPS	71.5114	10.3697
ASPCTr	84.8214		ASPCTr	84.8169	0.12495		5HTRPVESSEC	79.3342	9.94065		CYSTGL	87.8126	11.268		RPI	71.5114	10.3697
CBPS	84.8214		CBPS	84.8169	0.12495		EX_5htrp(e)	79.3342	9.94065		CYSTS	87.8126	11.268		H2CO3D	72.2508	11.6884
DHORD9	84.8214		ORPT	84.8169	0.12495		EX_srtn(e)	79.3342	9.94065		METAT	88.4716	11.5391		H2CO3D2	72.2508	11.6884
DHORTS	84.8214		DHORD9	84.8169	0.12495		TRPHYDRO2	79.3342	9.94065		AHC	88.4716	11.5391		ORPT	72.2508	11.6884
H2CO3D	84.8214		DHORTS	84.8169	0.12495		CYSTGL	83.0735	3.06205		H2CO3D	88.5926	11.9553		OMPDC	72.2508	11.6884
H2CO3D2	84.8214		OMPDC	84.8169	0.12495		CYSTS	83.0735	3.06205		H2CO3D2	88.5926	11.9553		DHORD9	72.2508	11.6884
OMPDC	84.8214		H2CO3D2	84.8169	0.12495		AHC	83.9361	3.89494		OMPDC	88.5926	11.9553		DHORTS	72.2508	11.6884
ORPT	84.8214		H2CO3D	84.8169	0.12495		METAT	83.9361	3.89494		CBPS	88.5926	11.9553		ASPCTr	72.2508	11.6884
PRPPS	85.3761		PRPPS	85.3715	0.126941		CYSAMO	86.7811	3.1678		ORPT	88.5926	11.9553		CBPS	72.2508	11.6884
RPI	85.3761		RPI	85.3715	0.126941		CYSTA	86.7811	3.1678		ASPCTr	88.5926	11.9553		GMPS2	73.473	15.2171
AHC	85.4756		METAT	85.486	0.234333		EX_cgly(e)	86.7811	3.1678		DHORD9	88.5926	11.9553		IMPD	73.473	15.2171
CYSTGL	85.4756		AHC	85.486	0.234333		EX_cys-L(e)	86.7811	3.1678		DHORTS	88.5926	11.9553		PRFGS	74.0505	12.857
CYSTS	85.4756		CYSTGL	85.486	0.234333		EX_mercplaccys(e)	86.7811	3.1678		RPI	91.3406	10.1409		GLUPRT	74.0505	12.857
METAT	85.4756		CYSTS	85.486	0.234333		EX_met-L(e)	86.7811	3.1678		PRPPS	91.3406	10.1409		PRAIS	74.0505	12.857
ADSL2	85.9308		PRASCS	85.9261	0.128931		EX_taur(e)	86.7811	3.1678		THBPT4ACAMDASE	91.3544	10.8276		GARFT	74.0505	12.857
AICART	85.9308		ADSL2	85.9261	0.128931		HYPTROX	86.7811	3.1678		PHETHPTOX2	91.4226	10.875		PRASCS	74.0505	12.857
AIRCr	85.9308		AIRCr	85.9261	0.128931		MCLACCYSR	86.7811	3.1678		3MLDAt	91.6627	10.481		PRAGSr	74.0505	12.857
GARFT	85.9308		AICART	85.9261	0.128931		MCLOR	86.7811	3.1678		EX_3mlda(e)	91.6627	10.481		ADSL2	74.0505	12.857
GLUPRT	85.9308		PRAIS	85.9261	0.128931		MERCPLACCYSt	86.7811	3.1678		EX_his-L(e)	91.6627	10.481		IMPC	74.0505	12.857
IMPC	85.9308		PRFGS	85.9261	0.128931		PAN4PP	86.7811	3.1678		EX_hista(e)	91.6627	10.481		AICART	74.0505	12.857
PRAGSr	85.9308		PRAGSr	85.9261	0.128931		PNTEH	86.7811	3.1678		FTCD	91.6627	10.481		AIRCr	74.0505	12.857
PRAIS	85.9308		GARFT	85.9261	0.128931		PNTK	86.7811	3.1678		GluForTx	91.6627	10.481		5HLTDL	75.0306	14.0702
PRASCS	85.9308		IMPC	85.9261	0.128931		PPCDC	86.7811	3.1678		HISD	91.6627	10.481		5HTRPVESSEC	75.0306	14.0702
PRFGS	85.9308		GLUPRT	85.9261	0.128931		PPNCL3	86.7811	3.1678		HISDC	91.6627	10.481		EX_5htrp(e)	75.0306	14.0702
ADSL1	89.1749		ADSS	89.1698	0.141141		TAURt4(2)r	86.7811	3.1678		HISTAtu	91.6627	10.481		EX_srtn(e)	75.0306	14.0702
ADSS	89.1749		ADSL1	89.1698	0.141141		GMPS2	87.2807	8.9868		IZPN	91.6627	10.481		EX_trp-L(e)	75.0306	14.0702
CYSAMO	93.3124		CYSTA	93.3214	0.258735		IMPD	87.2807	8.98681		MACOXO	91.6627	10.481		TRPHYDRO2	75.0306	14.0702
CYSTA	93.3124		MERCPLACCYSt	93.3214	0.258735		THBPT4ACAMDASE	90.0929	3.40509		MHISOR	91.6627	10.481		ADSL1	76.4195	14.7257
EX_cgly(e)	93.3124		EX_cys-L(e)	93.3214	0.258735		PHETHPTOX2	91.3833	3.94991		SAMHISTA	91.6627	10.481		ADSS	76.4195	14.7257
EX_cys-L(e)	93.3124		EX_cgly(e)	93.3214	0.258735		H2CO3D	91.5032	8.57383		URCN	91.6627	10.481		CYSTGL	81.6989	11.2829
EX_mercplaccys(e)	93.3124		MCLOR	93.3214	0.258735		H2CO3D2	91.5032	8.57383		EX_pi(e)	91.8171	11.1092		CYSTS	81.6989	11.2829
EX_met-L(e)	93.3124		TAURt4(2)r	93.3214	0.258735		OMPDC	91.5032	8.57383		ADSS	92.1641	10.6726		THBPT4ACAMDASE	87.4069	9.46425
EX_taur(e)	93.3124		PAN4PP	93.3214	0.258735		ORPT	91.5032	8.57383		ADSL1	92.1641	10.6726		CYSAMO	89.2468	8.64644
HYPTROX	93.3124		PPCDC	93.3214	0.258735		ASPCTr	91.5032	8.57383		G5SADrm	92.1996	10.1238		EX_cgly(e)	89.2468	8.64644
MCLACCYSR	93.3124		EX_mercplaccys(e)	93.3214	0.258735		CBPS	91.5032	8.57383		P5CRxm	92.1996	10.1238		EX_cys-L(e)	89.2468	8.64644
MCLOR	93.3124		EX_taur(e)	93.3214	0.258735		DHORD9	91.5032	8.57383		PROtm	92.1996	10.1238		EX_mercplaccys(e)	89.2468	8.64644
MERCPLACCYSt	93.3124		EX_met-L(e)	93.3214	0.258735		DHORTS	91.5032	8.57383		THRD_L	92.2405	10.3531		EX_met-L(e)	89.2468	8.64644
PAN4PP	93.3124		PNTEH	93.3214	0.258735		PRPPS	91.9027	8.46908		EX_thr-L(e)	92.2405	10.3531		EX_taur(e)	89.2468	8.64644
PNTEH	93.3124		PNTK	93.3214	0.258735		RPI	91.9027	8.46911		ALATA_L	92.4941	10.5864		HYPTROX	89.2468	8.64644
PNTK	93.3124		HYPTROX	93.3214	0.258735		PRAGSr	92.2872	8.35921		ALAR	92.4941	10.5864		MCLACCYSR	89.2468	8.64644
PPCDC	93.3124		MCLACCYSR	93.3214	0.258735		PRASCS	92.2872	8.35923		GLUPRT	92.6076	10.3546		MCLOR	89.2468	8.64644
PPNCL3	93.3124		PPNCL3	93.3214	0.258735		GLUPRT	92.2872	8.35923		ADSL2	92.6076	10.3546		MERCPLACCYSt	89.2468	8.64644
TAURt4(2)r	93.3124		CYSAMO	93.3214	0.258735		AIRCr	92.2873	8.35926		IMPC	92.6076	10.3546		PAN4PP	89.2468	8.64644
PHETHPTOX2	93.5015		THBPT4ACAMDASE	93.5149	0.289361		IMPC	92.2873	8.35926		PRAGSr	92.6076	10.3546		PNTEH	89.2468	8.64644
THBPT4ACAMDASE	93.5015		PHETHPTOX2	93.5149	0.289361		ADSL2	92.2873	8.35926		AICART	92.6076	10.3546		PNTK	89.2468	8.64644
EX_thr-L(e)	95.0136		THRD_L	95.0137	0.232986		PRAIS	92.2873	8.35926		GARFT	92.6076	10.3546		PPCDC	89.2468	8.64644
THRD_L	95.0136		EX_thr-L(e)	95.0137	0.232986		GARFT	92.2873	8.35926		PRAIS	92.6076	10.3546		PPNCL3	89.2468	8.64644
3AIBt	96.8652		EX_3aib(e)	96.8652	5.39557e-12		PRFGS	92.2873	8.35926		PRFGS	92.6076	10.3546		TAURt4(2)r	89.2468	8.64644
3AIBTm	96.8652		MMTSADm	96.8652	5.39557e-12		AICART	92.2873	8.35926		PRASCS	92.6076	10.3546		CYSTA	89.2468	8.64644
3AIBtm	96.8652		VALt5m	96.8652	5.39557e-12		3MLDAt	93.7575	4.80907		AIRCr	92.6076	10.3546		METAT	89.7589	11.7563
3HBCOAHLm	96.8652		VALTAm	96.8652	5.39557e-12		EX_3mlda(e)	93.7575	4.80907		ASNS1	92.9215	9.76799		AHC	89.7589	11.7563
ACOAD9m	96.8652		3AIBTm	96.8652	2.43834e-11		EX_his-L(e)	93.7575	4.80907		CYSAMO	92.9478	9.93694		DHPR	90.9891	9.8237
ECOAH12m	96.8652		3AIBtm	96.8652	2.43834e-11		EX_hista(e)	93.7575	4.80907		CYSTA	92.9478	9.93694		DHPR2	90.9891	9.8237
EX_3aib(e)	96.8652		3HBCOAHLm	96.8652	2.74219e-11		FTCD	93.7575	4.80907		EX_cgly(e)	92.9478	9.93694		PHETHPTOX2	91.1502	9.05804
EX_val-L(e)	96.8652		ACOAD9m	96.8652	2.74219e-11		GluForTx	93.7575	4.80907		EX_cys-L(e)	92.9478	9.93694		3MLDAt	91.184	10.9742
HIBDm	96.8652		ECOAH12m	96.8652	2.74219e-11		HISD	93.7575	4.80907		EX_mercplaccys(e)	92.9478	9.93694		EX_3mlda(e)	91.184	10.9742
MMMm	96.8652		HIBDm	96.8652	2.74219e-11		HISDC	93.7575	4.80907		EX_met-L(e)	92.9478	9.93694		EX_his-L(e)	91.184	10.9742
MMTSADm	96.8652		OIVD2m	96.8652	2.75594e-11		IZPN	93.7575	4.80907		EX_taur(e)	92.9478	9.93694		EX_hista(e)	91.184	10.9742
OIVD2m	96.8652		3AIBt	96.8652	3.6435e-11		MACOXO	93.7575	4.80907		HYPTROX	92.9478	9.93694		FTCD	91.184	10.9742
VALt5m	96.8652		MMMm	96.8652	7.74137e-11		MHISOR	93.7575	4.80907		MCLACCYSR	92.9478	9.93694		GluForTx	91.184	10.9742
VALTAm	96.8652		EX_val-L(e)	96.8652	4.88633e-11		SAMHISTA	93.7575	4.80907		MCLOR	92.9478	9.93694		HISD	91.184	10.9742
EX_pi(e)	97.205		VALtec	96.8652	3.65856e-12		URCN	93.7575	4.80907		MERCPLACCYSt	92.9478	9.93694		HISDC	91.184	10.9742
2HBO	97.6989		EX_pi(e)	97.1988	0.169387		HISTAtu	93.7575	4.80909		PAN4PP	92.9478	9.93694		HISTAtu	91.184	10.9742
2HBt2	97.6989		OBDHc	97.6998	0.237242		ADSS	95.7799	6.90342		PNTEH	92.9478	9.93694		IZPN	91.184	10.9742
2MCITt	97.6989		MCITS	97.6998	0.237242		ADSL1	95.7799	6.90342		PNTK	92.9478	9.93694		MACOXO	91.184	10.9742
EX_2hb(e)	97.6989		EX_2mcit(e)	97.6998	0.237242		DHPR	95.9564	4.74615		PPCDC	92.9478	9.93694		MHISOR	91.184	10.9742
EX_2mcit(e)	97.6989		EX_2hb(e)	97.6998	0.237242		DHPR2	95.9564	4.74615		PPNCL3	92.9478	9.93694		SAMHISTA	91.184	10.9742
MCITS	97.6989		2MCITt	97.6998	0.237242		EX_pi(e)	97.2384	5.72085		TAURt4(2)r	92.9478	9.93694		URCN	91.184	10.9742
OBDHc	97.6989		2HBt2	97.6998	0.237242		2HBO	98.173	2.54007		2HBO	94.3558	9.60877		ASNS1	93.0793	9.23681
10FTHF5GLUtl	100		2HBO	97.6998	0.237242		2HBt2	98.173	2.54007		2HBt2	94.3558	9.60877		GHMT2r	93.7444	9.41924
10FTHF5GLUtm	100		3MLDAt	99.9379	0.225513		2MCITt	98.173	2.54007		2MCITt	94.3558	9.60877		P5CRxm	96.351	7.43945
10FTHF6GLUtl	100		SAMHISTA	99.9379	0.225513		EX_2hb(e)	98.173	2.54007		EX_2hb(e)	94.3558	9.60877		PROtm	96.351	7.43945
10FTHF6GLUtm	100		MHISOR	99.9379	0.225513		EX_2mcit(e)	98.173	2.54007		EX_2mcit(e)	94.3558	9.60877		PYNP2r	96.4784	7.36633
10FTHF7GLUtl	100		MACOXO	99.9379	0.225513		MCITS	98.173	2.54007		MCITS	94.3558	9.60877		PUNP4	96.521	7.3368
10FTHF7GLUtm	100		HISTAtu	99.9379	0.225513		OBDHc	98.173	2.54007		OBDHc	94.3558	9.60877		EX_dgsn(e)	96.5503	7.31707
10FTHFtl	100		EX_3mlda(e)	99.9379	0.225513		EX_thr-L(e)	98.4793	2.57521		3AIBt	94.5776	9.63789		EX_ade(e)	96.5503	7.31707
10FTHFtm	100		EX_his-L(e)	99.9379	0.225513		THRD_L	98.4793	2.57522		3AIBTm	94.5776	9.63789		EX_glu-L(e)	96.5503	7.31707
13DAMPPOX	100		EX_hista(e)	99.9379	0.225513		ASNS1	99.0594	2.15698		3AIBtm	94.5776	9.63789		EX_ala-D(e)	96.5503	7.31707
1a,24,25VITD2Hm	100		IZPN	99.9379	0.225513		3AIBt	99.084	1.67349		3HBCOAHLm	94.5776	9.63789		EX_hxan(e)	96.5503	7.31707
1a,24,25VITD3Hm	100		HISDC	99.9379	0.225513		3AIBTm	99.084	1.67349		ACOAD9m	94.5776	9.63789		EX_asn-L(e)	96.5503	7.31707
1a,25VITD2Hm	100		GluForTx	99.9379	0.225513		3AIBtm	99.084	1.67349		ECOAH12m	94.5776	9.63789		EX_dad-2(e)	96.5503	7.31707
1a,25VITD3Hm	100		HISD	99.9379	0.225513		3HBCOAHLm	99.084	1.67349		EX_3aib(e)	94.5776	9.63789		EX_nh4(e)	96.5503	7.31707
1MNCAMti	100		FTCD	99.9379	0.225513		ACOAD9m	99.084	1.67349		EX_val-L(e)	94.5776	9.63789		DGSNt	96.5503	7.31707
24,25DHVITD2t	100		URCN	99.9379	0.225513		ECOAH12m	99.084	1.67349		HIBDm	94.5776	9.63789		GUAt	96.5503	7.31707
24,25DHVITD2tm	100		6DHFtm	100	1.31897e-11		EX_3aib(e)	99.084	1.67349		MMMm	94.5776	9.63789		CBPSam	96.5503	7.31707
24,25DHVITD3t	100		ACACT10m	100	1.31897e-11		EX_val-L(e)	99.084	1.67349		MMTSADm	94.5776	9.63789		EX_gln-L(e)	96.5503	7.31707
24,25DHVITD3tm	100		ACETONEt2m	100	1.31897e-11		HIBDm	99.084	1.67349		OIVD2m	94.5776	9.63789		EX_gluala(e)	96.5503	7.31707
24,25VITD2Hm	100		ACOAD10m	100	1.31897e-11		MMMm	99.084	1.67349		VALt5m	94.5776	9.63789		ADEt	96.5503	7.31707
24,25VITD3Hm	100		ADCim	100	1.31897e-11		MMTSADm	99.084	1.67349		VALTAm	94.5776	9.63789		EX_ins(e)	96.5503	7.31707
24NPHte	100		ADNK1	100	1.32287e-11		OIVD2m	99.084	1.67349		5HTRPVESSEC	94.8221	9.5683		EX_pro-L(e)	96.5503	7.31707
25HVITD2t	100		ALR	100	1.31896e-11		VALt5m	99.084	1.67349		EX_5htrp(e)	94.8221	9.5683		EX_adn(e)	96.5503	7.31707
25HVITD2tin	100		AMPTASECG	100	1.31897e-11		VALTAm	99.084	1.67349		5HLTDL	94.8221	9.5683		EX_ala-L(e)	96.5503	7.31707
25HVITD2tin-m	100		AMPTASECGe	100	1.31897e-11		GHMT2r	99.4323	2.23321		EX_srtn(e)	94.8221	9.5683		EX_gly(e)	96.5503	7.31707
25HVITD2tm	100		ARTFR12	100	1.31897e-11		PROtm	99.6262	1.49754		EX_trp-L(e)	94.8221	9.5683		EX_gsn(e)	96.5503	7.31707
25HVITD3t	100		ARTFR41	100	1.31897e-11		P5CRxm	99.6262	1.49754		TRPHYDRO2	94.8221	9.5683		EX_ser-L(e)	96.5503	7.31707
25HVITD3tin	100		BTNt3i	100	1.31897e-11		PYNP2r	99.7206	1.41811		ORNTArm	95.0879	9.53262		OCBTm	96.5503	7.31707
25HVITD3tin-m	100		CGLYt3(2)	100	1.31897e-11		G5SADrm	99.7247	1.29183		GHMT2r	95.179	9.50006		EX_gua(e)	96.5503	7.31707
25HVITD3tm	100		CITtam	100	1.31897e-11		PUNP4	99.7277	1.40162		G5SDym	95.3297	9.46135		HYXNt	96.5503	7.31707
25VITD2Hm	100		CYOOm2	100	1.31897e-11		EX_gsn(e)	99.7324	1.39087		GLU5Km	95.3297	9.46135		EX_ura(e)	96.5536	7.31489
25VITD3Hm	100		CYTD	100	1.31897e-11		EX_ala-D(e)	99.7324	1.39087		PGCD	95.3397	9.46043		URAt	96.5536	7.31489
2DR1PP	100		D-LACt2	100	1.31897e-11		EX_ala-L(e)	99.7324	1.39087		PSERT	95.3397	9.46043		DM_dgtp(n)	96.5652	7.30727
2HCO3_NAt	100		DADA	100	1.31896e-11		ADEt	99.7324	1.39087		PSP_L	95.3397	9.46043		DGTPtn	96.5652	7.30727
2OXOADOXm	100		DADAe	100	1.31897e-11		CBPSam	99.7324	1.39087		SUCD1m	95.3463	9.46		CAMPt	96.5696	7.30434
2OXOADPTm	100		DADNK	100	1.31897e-11		EX_ade(e)	99.7324	1.39087		ME1m	95.355	9.45965		EX_camp(e)	96.5696	7.30434
34DHPHAMT	100		DALAOXx	100	1.31897e-11		EX_adn(e)	99.7324	1.39087		ME2	95.355	9.45965		DCYTt	96.5806	7.29722
34DHPLACOX	100		DALAxt	100	1.31897e-11		EX_asn-L(e)	99.7324	1.39087		ME2m	95.355	9.45965		EX_dcyt(e)	96.5806	7.29722
34DHPLACOX(NADP)	100		DASCBR	100	1.31896e-11		EX_dad-2(e)	99.7324	1.39087		PEPCK	95.355	9.45965		EX_cytd(e)	96.607	7.28028
34HPLFM	100		DCYTt	100	1.31897e-11		EX_dgsn(e)	99.7324	1.39087		SUCCt2m	95.355	9.45965		ETF	96.614	7.4742
35CGMPtn	100		DESAT16_2	100	1.31897e-11		EX_gln-L(e)	99.7324	1.39087		CITtbm	95.355	9.45965		ETFQO	96.614	7.4742
3DPHBH1	100		ECOAH9m	100	1.31897e-11		EX_glu-L(e)	99.7324	1.39087		EX_succ(e)	95.355	9.45965		NADH2-u10m	96.614	7.4742
3DPHBH2	100		EX_1glyc_hs(e)	100	1.31897e-11		EX_gluala(e)	99.7324	1.39087		PEPCKm	95.355	9.45965		2HBO	96.625	7.47303
3DSPHR	100		EX_adrn(e)	100	1.31897e-11		EX_gly(e)	99.7324	1.39087		PYRt2m	95.355	9.45965		2HBt2	96.625	7.47303
3HAO	100		EX_ksi_deg1(e)	100	1.31897e-11		EX_hxan(e)	99.7324	1.39087		DHPR	95.4436	9.46982		2MCITt	96.625	7.47303
3HBCDm	100		EX_lac-L(e)	100	1.31897e-11		EX_ins(e)	99.7324	1.39087		DHPR2	95.4436	9.46982		EX_2hb(e)	96.625	7.47303
3HCO3_NAt	100		EX_leuktrD4(e)	100	1.31897e-11		EX_nh4(e)	99.7324	1.39087		10FTHF6GLUtl	95.5118	9.49467		EX_2mcit(e)	96.625	7.47303
3HLYTCL	100		EX_leuktrF4(e)	100	1.31897e-11		EX_pro-L(e)	99.7324	1.39087		10FTHF6GLUtm	95.5118	9.49467		MCITS	96.625	7.47303
3HPCOAHYD	100		EX_mag_hs(e)	100	1.31897e-11		EX_ser-L(e)	99.7324	1.39087		10FTHF7GLUtm	95.5118	9.49467		OBDHc	96.625	7.47303
3HXKYNDCL	100		EX_Rtotal(e)	100	1.31897e-11		HYXNt	99.7324	1.39087		13DAMPPOX	95.5118	9.49467		PUNP3	96.6409	7.25918
3HXKYNOXDA	100		EX_Rtotal2(e)	100	1.31897e-11		OCBTm	99.7324	1.39087		1a,24,25VITD2Hm	95.5118	9.49467		UREAtm	96.6818	7.22106
3M4HDXPAC	100		EX_ser-L(e)	100	1.31897e-11		DGSNt	99.7324	1.39087		1a,24,25VITD3Hm	95.5118	9.49467		ARGN	96.6818	7.22106
3MLDAt	100		EX_tettet6(e)	100	1.31897e-11		EX_gua(e)	99.7324	1.39087		1a,25VITD2Hm	95.5118	9.49467		ARGNm	96.6818	7.22106
3MOBt2im	100		FACOAL224	100	1.31897e-11		GUAt	99.7324	1.39087		1a,25VITD3Hm	95.5118	9.49467		ARGtm	96.6818	7.22106
3MOPt2im	100		FACOAL244_1	100	1.31897e-11		EX_ura(e)	99.7329	1.38969		24,25DHVITD2t	95.5118	9.49467		EX_urea(e)	96.6818	7.22106
3MOX4HOXPGALDOX	100		FAOXC2442246x	100	1.31897e-11		URAt	99.7329	1.38969		24,25DHVITD2tm	95.5118	9.49467		DM_dgtp(m)	96.7235	7.2105
3MOX4HOXPGALDOX(NADP)	100		FUCASE2e	100	1.31897e-11		DGTPtn	99.7347	1.3856		24,25VITD2Hm	95.5118	9.49467		NDPK5m	96.7235	7.2105
3MOXTYROX	100		GMPR	100	1.31897e-11		DM_dgtp(n)	99.7347	1.3856		24NPHte	95.5118	9.49467		CGMPt	96.726	7.20905
3NTD7l	100		GPDDA1	100	1.31897e-11		CAMPt	99.7354	1.38404		25HVITD2t	95.5118	9.49467		EX_35cgmp(e)	96.726	7.20905
3SALAASPm	100		GTHO	100	1.31897e-11		EX_camp(e)	99.7354	1.38404		25HVITD2tin	95.5118	9.49467		DINt	96.7305	7.20652
3SALATAi	100		GTMLTe	100	1.31897e-11		DCYTt	99.737	1.38026		25HVITD2tin-m	95.5118	9.49467		EX_din(e)	96.7305	7.20652
3SALATAim	100		GUACYC	100	1.31897e-11		EX_dcyt(e)	99.737	1.38026		25HVITD2tm	95.5118	9.49467		PUNP6	96.7305	7.20652
41R1H2MAE12BOOX	100		GUAPRT	100	1.31897e-11		EX_cytd(e)	99.7409	1.37137		25HVITD3tin	95.5118	9.49467		EX_creat(e)	96.7505	7.18338
41R2A1H12BOOX	100		H2Otg	100	1.31897e-11		PUNP3	99.7458	1.36055		25HVITD3tin-m	95.5118	9.49467		GACMTRc	96.7505	7.18338
42A12BOOX	100		HACD9m	100	1.31897e-11		DM_dgtp(m)	99.7563	1.33639		25VITD2Hm	95.5118	9.49467		CREATt4(2)r	96.7505	7.18338
4ABUTtm	100		HSD3B3r	100	1.31897e-11		NDPK5m	99.7563	1.33639		25VITD3Hm	95.5118	9.49467		GLYAMDTRc	96.7505	7.18338
4HBZCOAFm	100		HYPOE	100	1.31897e-11		CGMPt	99.7566	1.33569		2DR1PP	95.5118	9.49467		PUNP5	96.7701	7.18479
4HBZFm	100		LACZe	100	1.31896e-11		EX_35cgmp(e)	99.7566	1.33569		2HCO3_NAt	95.5118	9.49467		ADKd	96.8962	7.12163
4HDEBRISOQUINEte	100		LCADi	100	1.31897e-11		DINt	99.7572	1.33448		2OXOADOXm	95.5118	9.49467		DM_datp(n)	96.8962	7.12163
4HGLSDm	100		LCADi_D	100	1.31897e-11		EX_din(e)	99.7572	1.33448		2OXOADPTm	95.5118	9.49467		DATPtn	96.8962	7.12163
4HOXPACDOX(NADP)	100		LEUKTRD4t	100	1.31897e-11		PUNP6	99.7572	1.33448		34HPLFM	95.5118	9.49467		DURIPP	96.9456	7.09953
4MOPt2im	100		LEUKTRF4t	100	1.31897e-11		PUNP5	99.762	1.32422		35CGMPtn	95.5118	9.49467		DHFR	96.9498	7.0977
4MPTNLte	100		LPASE	100	1.31897e-11		ARGN	99.7642	1.31124		3DPHBH1	95.5118	9.49467		TMDS	96.9498	7.0977
4MPTNLtm	100		LPS4e	100	1.31897e-11		ARGNm	99.7642	1.31124		3DPHBH2	95.5118	9.49467		TMDPP	96.9874	7.075
4MPTNLtr	100		MAN1PT2	100	1.31897e-11		ARGtm	99.7642	1.31124		3HAO	95.5118	9.49467		THYMt	96.9874	7.075
4NPHSFte	100		MGSA	100	1.31896e-11		EX_urea(e)	99.7642	1.31124		3HBCDm	95.5118	9.49467		EX_thym(e)	96.9874	7.075
4NPHSULT	100		MGSA2	100	1.31896e-11		UREAtm	99.7642	1.31124		3HCO3_NAt	95.5118	9.49467		DM_datp(m)	97.0724	7.02748
4NPHte	100		NDP6	100	1.31897e-11		CREATt4(2)r	99.7709	1.29799		3HLYTCL	95.5118	9.49467		DM_dctp(n)	97.1726	6.9521
4PYRDX	100		NH4tp	100	1.31897e-11		EX_creat(e)	99.7709	1.29799		3HPCOAHYD	95.5118	9.49467		DCTPtn	97.1726	6.9521
5ADTSTSTERONEGLCte	100		NRPPHRVESSEC	100	1.31897e-11		GACMTRc	99.7709	1.29799		3HXKYNDCL	95.5118	9.49467		SERPT	97.3596	6.8325
5ADTSTSTERONEGLCtr	100		OIVD3m	100	1.31897e-11		GLYAMDTRc	99.7709	1.29799		3HXKYNOXDA	95.5118	9.49467		3DSPHR	97.3596	6.8325
5ADTSTSTERONEte	100		PAFHe	100	1.31897e-11		ADKd	99.7757	1.29609		3NTD7l	95.5118	9.49467		EX_sph1p(e)	97.3675	6.82822
5ADTSTSTERONEtr	100		PDXPP	100	1.31897e-11		DATPtn	99.7757	1.29609		3SALAASPm	95.5118	9.49467		SPH1Pte	97.3675	6.82822
5DHFtl	100		PEFLIP	100	1.31897e-11		DM_datp(n)	99.7757	1.29609		3SALATAi	95.5118	9.49467		DM_dctp(m)	97.37	6.82686
5FTHFt2	100		PEFLIPm	100	1.31897e-11		ALAR	99.7787	1.24145		3SALATAim	95.5118	9.49467		NDPK7m	97.37	6.82686
5HLTDL	100		PI45P3Kn	100	1.31897e-11		ALATA_L	99.7787	1.24145		41R1H2MAE12BOOX	95.5118	9.49467		EX_uri(e)	97.3858	6.8185
5HOXINDACTO2OX	100		PMANM	100	1.31897e-11		DURIPP	99.7801	1.28673		41R2A1H12BOOX	95.5118	9.49467		ORNTArm	97.4749	6.84
5HOXINDACTOX	100		PYRt2p	100	1.31897e-11		DHFR	99.7804	1.28596		42A12BOOX	95.5118	9.49467		EX_thr-L(e)	97.4953	6.74412
5HOXINDACTOXm	100		SPODM	100	1.31897e-11		TMDS	99.7804	1.28596		4HBZCOAFm	95.5118	9.49467		THRD_L	97.4953	6.74412
5HOXINOXDA	100		TETTET6COAtx	100	1.31897e-11		EX_thym(e)	99.7842	1.27806		4HBZFm	95.5118	9.49467		NDPK8m	97.5329	6.75185
5HTRPDOX	100		TETTET6t	100	1.31897e-11		THYMt	99.7842	1.27806		4HDEBRISOQUINEte	95.5118	9.49467		DURIt	97.5704	6.73122
5HTRPVESSEC	100		TMDPPK	100	1.31897e-11		TMDPP	99.7842	1.27806		4HGLSDm	95.5118	9.49467		EX_duri(e)	97.5704	6.73122
5HXKYNDCL	100		10FTHF6GLUtm	100	1.3439e-11		DM_datp(m)	99.7915	1.26247		4MPTNLte	95.5118	9.49467		EX_4abut(e)	97.6288	6.70306
5HXKYNOXDA	100		DOLGLCP_Lter	100	1.34252e-11		DCTPtn	99.8012	1.24442		4MPTNLtm	95.5118	9.49467		SUCD1m	97.6965	6.83998
5MTHFt	100		HXPRT	100	1.35427e-11		DM_dctp(n)	99.8012	1.24442		4MPTNLtr	95.5118	9.49467		EX_arg-L(e)	97.7355	6.67888
5MTHFt2	100		PHEtec	100	1.34772e-11		ETF	99.803	1.2902		4NPHSFte	95.5118	9.49467		ARGSL	97.7903	6.65068
5THFtl	100		UDPDOLPT_L	100	1.34252e-11		ETFQO	99.803	1.2902		4NPHSULT	95.5118	9.49467		ARGSS	97.7903	6.65068
5THFtm	100		ACACt2	100	1.35151e-11		NADH2-u10m	99.803	1.2902		4NPHte	95.5118	9.49467		DM_dttp(n)	97.8225	6.64478
6DHFtl	100		ACCOACm	100	1.35151e-11		3DSPHR	99.8125	1.22442		5ADTSTSTERONEGLCte	95.5118	9.49467		DTMPK	97.8225	6.64478
6DHFtm	100		ACGAMtly	100	1.36695e-11		SERPT	99.8125	1.22442		5ADTSTSTERONEGLCtr	95.5118	9.49467		PSP_L	97.8371	6.63232
6HTSTSTERONEte	100		ADA	100	1.35152e-11		EX_sph1p(e)	99.8127	1.2238		5ADTSTSTERONEte	95.5118	9.49467		PGCD	97.8371	6.63232
6THFtl	100		ADAe	100	1.35152e-11		SPH1Pte	99.8127	1.2238		5ADTSTSTERONEtr	95.5118	9.49467		PSERT	97.8371	6.63232
6THFtm	100		ALATA_L	100	1.35807e-11		DM_dctp(m)	99.8128	1.2236		5DHFtl	95.5118	9.49467		CITtbm	97.841	6.74247
7DHCHSTEROLtr	100		CDS	100	1.35152e-11		NDPK7m	99.8128	1.2236		5FTHFt2	95.5118	9.49467		EX_succ(e)	97.841	6.74247
7DHFtl	100		EX_acac(e)	100	1.35151e-11		EX_uri(e)	99.8132	1.22238		5HOXINDACTO2OX	95.5118	9.49467		ME1m	97.841	6.74247
7DHFtm	100		EX_fru(e)	100	1.35152e-11		PGCD	99.814	1.2062		5HOXINDACTOX	95.5118	9.49467		ME2	97.841	6.74247
7THFtl	100		EX_man(e)	100	1.37716e-11		PSERT	99.814	1.2062		5HOXINDACTOXm	95.5118	9.49467		ME2m	97.841	6.74247
7THFtm	100		EX_pro-L(e)	100	1.35152e-11		PSP_L	99.814	1.2062		5HOXINOXDA	95.5118	9.49467		PEPCK	97.841	6.74247
A_MANASE	100		HMGLm	100	1.35668e-11		NDPK8m	99.8171	1.21309		5HTRPDOX	95.5118	9.49467		PEPCKm	97.841	6.74247
A_MANASEly	100		MCDm	100	1.35151e-11		DURIt	99.8183	1.21084		5HXKYNDCL	95.5118	9.49467		PYRt2m	97.841	6.74247
A4GALTc	100		PAFH	100	1.36312e-11		EX_duri(e)	99.8183	1.21084		5HXKYNOXDA	95.5118	9.49467		SUCCt2m	97.841	6.74247
A4GALTg	100		PAFS	100	1.35151e-11		EX_4abut(e)	99.8194	1.20787		5THFtm	95.5118	9.49467		DHCRD1	97.8913	6.63727
AACOAT	100		PDE4	100	1.35151e-11		ARGSL	99.8211	1.20141		6DHFtl	95.5118	9.49467		DSAT	97.8913	6.63727
ABO1g	100		PPAm	100	1.36047e-11		ARGSS	99.8211	1.20141		6DHFtm	95.5118	9.49467		SMPD4	97.8948	6.63708
ABO2g	100		AKGt4_3	100	1.40457e-11		GLNS	99.8213	1.20087		6HTSTSTERONEte	95.5118	9.49467		SPHMDAc	97.8948	6.63708
ABO3g	100		EX_akg(e)	100	1.40457e-11		DM_dttp(n)	99.8215	1.20042		6THFtm	95.5118	9.49467		DM_ethamp(r)	97.8948	6.63708
ABO4g	100		FAOXC18480m	100	1.38725e-11		DTMPK	99.8215	1.20042		7DHFtm	95.5118	9.49467		HDCAter	97.8948	6.63708
ABO5g	100		FAOXC2051843m	100	1.38725e-11		EX_arg-L(e)	99.8218	1.1997		7THFtm	95.5118	9.49467		SGPL12r	97.8948	6.63708
ABO6g	100		SBPP3er	100	1.41214e-11		DHCRD1	99.8222	1.19863		A_MANASE	95.5118	9.49467		CERK	97.8971	6.63696
ABO7g	100		SPHINGStr	100	1.41214e-11		DSAT	99.8222	1.19863		A4GALTc	95.5118	9.49467		CRMPte	97.8971	6.63696
ABO8g	100		COAtm	100	1.41435e-11		DM_ethamp(r)	99.8223	1.19855		ABO1g	95.5118	9.49467		EX_crmp_hs(e)	97.8971	6.63696
ABO9g	100		RTOTAL2t	100	1.43269e-11		HDCAter	99.8223	1.19855		ABO2g	95.5118	9.49467		SPHS1Pte	97.8971	6.63696
ABTArm	100		CATp	100	1.44593e-11		SGPL12r	99.8223	1.19855		ABO3g	95.5118	9.49467		EX_sphs1p(e)	97.8971	6.63696
ABTD	100		PCFLOPm	100	1.47662e-11		SMPD4	99.8223	1.19855		ABO4g	95.5118	9.49467		DNDPt21m	97.8973	6.63695
ABTti	100		ASCBOX	100	1.49397e-11		SPHMDAc	99.8223	1.19855		ABO5g	95.5118	9.49467		DNDPt30m	97.8973	6.63695
ABUTD	100		SMS	100	1.49198e-11		CERK	99.8223	1.19849		ABO6g	95.5118	9.49467		DNDPt12m	97.8973	6.63695
ABUTt2r	100		FAS160COA	100	1.52823e-11		CRMPte	99.8223	1.19849		ABO7g	95.5118	9.49467		DNDPt18m	97.8973	6.63695
ABUTt2rL	100		PI5P4Kn	100	1.52165e-11		EX_crmp_hs(e)	99.8223	1.19849		ABO8g	95.5118	9.49467		DNDPt43m	97.8973	6.63695
ABUTt4(2)r	100		PIK5n	100	1.52165e-11		EX_sphs1p(e)	99.8223	1.19849		ABO9g	95.5118	9.49467		DNDPt56m	97.8973	6.63695
ACACT1	100		PGPP_hs	100	1.54049e-11		ADNK1m	99.8223	1.19849		ABTArm	95.5118	9.49467		ADNtm	97.8973	6.63695
ACACT10m	100		PGPPT	100	1.54049e-11		ADNtm	99.8223	1.19849		ABTD	95.5118	9.49467		DNDPt13m	97.8973	6.63695
ACACT1r	100		MI1PP	100	1.56035e-11		DNDPt12m	99.8223	1.19849		ABTti	95.5118	9.49467		DNDPt19m	97.8973	6.63695
ACACT1rm	100		DOLP_Uter	100	1.58778e-11		DNDPt13m	99.8223	1.19849		ABUTD	95.5118	9.49467		DNDPt1m	97.8973	6.63695
ACACT1x	100		GLYOX	100	1.57241e-11		DNDPt18m	99.8223	1.19849		ABUTt2r	95.5118	9.49467		DNDPt20m	97.8973	6.63695
ACACt2	100		O2t	100	1.59754e-11		DNDPt19m	99.8223	1.19849		ABUTt2rL	95.5118	9.49467		DNDPt31m	97.8973	6.63695
ACACt2m	100		ACITL	100	1.62392e-11		DNDPt1m	99.8223	1.19849		ABUTt4(2)r	95.5118	9.49467		DNDPt32m	97.8973	6.63695
ACACT4p	100		MTHFR3	100	1.63628e-11		DNDPt20m	99.8223	1.19849		ACACT1	95.5118	9.49467		DNDPt45m	97.8973	6.63695
ACACT5p	100		RETFAt1	100	1.64266e-11		DNDPt21m	99.8223	1.19849		ACACT10m	95.5118	9.49467		DNDPt55m	97.8973	6.63695
ACACT6p	100		A4GALTg	100	1.68335e-11		DNDPt2m	99.8223	1.19849		ACACT1x	95.5118	9.49467		DNDPt58m	97.8973	6.63695
ACACT7p	100		ACGAGBSIDEtg	100	1.68335e-11		DNDPt30m	99.8223	1.19849		ACACT4p	95.5118	9.49467		ADNK1m	97.8973	6.63695
ACACT8p	100		ACGAGBSIDEtl	100	1.68335e-11		DNDPt31m	99.8223	1.19849		ACACT5p	95.5118	9.49467		DNDPt2m	97.8973	6.63695
ACACT9p	100		B3GALT3g	100	1.68335e-11		DNDPt32m	99.8223	1.19849		ACACT6p	95.5118	9.49467		DNDPt44m	97.8973	6.63695
ACACtx	100		CO2t	100	1.69299e-11		DNDPt42m	99.8223	1.19849		ACACT7p	95.5118	9.49467		DNDPt57m	97.8973	6.63695
ACALDt	100		EX_co2(e)	100	1.69299e-11		DNDPt43m	99.8223	1.19849		ACACT8p	95.5118	9.49467		DNDPt42m	97.8973	6.63695
ACALDtm	100		EX_gbside_hs(e)	100	1.68335e-11		DNDPt44m	99.8223	1.19849		ACACT9p	95.5118	9.49467		DGSNtm	97.9057	6.63658
ACALDtr	100		GBGT1	100	1.68335e-11		DNDPt45m	99.8223	1.19849		ACACtx	95.5118	9.49467		DGK2m	97.9057	6.63658
ACALDtx	100		GBSIDEte	100	1.68335e-11		DNDPt55m	99.8223	1.19849		ACALDt	95.5118	9.49467		DGNSKm	97.9057	6.63658
ACCOAC	100		GBSIDEtl	100	1.68335e-11		DNDPt56m	99.8223	1.19849		ACALDtm	95.5118	9.49467		NDPK4m	97.9152	6.63629
ACCOACm	100		NAGAly	100	1.68335e-11		DNDPt57m	99.8223	1.19849		ACALDtr	95.5118	9.49467		DM_dttp(m)	97.9152	6.63629
ACCOAgt	100		FAOXC180	100	1.69953e-11		DNDPt58m	99.8223	1.19849		ACCOACm	95.5118	9.49467		3AIBt	98.0317	6.62697
ACCOAL	100		GLUt6	100	1.7115e-11		SPHS1Pte	99.8223	1.1985		ACCOAL	95.5118	9.49467		3AIBTm	98.0317	6.62697
ACCOALm	100		OCCOAtm	100	1.73443e-11		DGK2m	99.8224	1.19831		ACCOALm	95.5118	9.49467		3AIBtm	98.0317	6.62697
ACCOAtn	100		PI35P3P	100	1.70033e-11		DGNSKm	99.8224	1.19831		ACCOAtn	95.5118	9.49467		3HBCOAHLm	98.0317	6.62697
ACCOAtr	100		ACGAMPM	100	1.80712e-11		DGSNtm	99.8224	1.19831		ACCOAtr	95.5118	9.49467		ACOAD9m	98.0317	6.62697
ACETONEt2	100		UAGDP	100	1.80712e-11		DM_dttp(m)	99.8225	1.19811		ACGALFUCGALACGALFUC12GAL14ACGLCGALGLUSIDEte	95.5118	9.49467		ECOAH12m	98.0317	6.62697
ACETONEt2m	100		DGULND	100	1.85455e-11		NDPK4m	99.8225	1.19811		ACGALFUCGALACGALFUC12GAL14ACGLCGALGLUSIDEtg	95.5118	9.49467		EX_3aib(e)	98.0317	6.62697
ACGAGBSIDEtg	100		GLCURter	100	1.85455e-11		CITtbm	99.8245	1.19595		ACGALFUCGALACGALFUCGALACGLCGAL14ACGLCGALGLUSIDEte	95.5118	9.49467		EX_val-L(e)	98.0317	6.62697
ACGAGBSIDEtl	100		GULN3D	100	1.85455e-11		EX_succ(e)	99.8245	1.19595		ACGALFUCGALACGALFUCGALACGLCGAL14ACGLCGALGLUSIDEtg	95.5118	9.49467		HIBDm	98.0317	6.62697
ACGALFUCGALACGALFUC12GAL14ACGLCGALGLUSIDEte	100		GULNter	100	1.86079e-11		ME1m	99.8245	1.19595		ACGALtly	95.5118	9.49467		MMMm	98.0317	6.62697
ACGALFUCGALACGALFUC12GAL14ACGLCGALGLUSIDEtg	100		ACGAMK	100	1.88866e-11		ME2	99.8245	1.19595		ACGPID	95.5118	9.49467		MMTSADm	98.0317	6.62697
ACGALFUCGALACGALFUCGALACGLCGAL14ACGLCGALGLUSIDEte	100		ARTFR31	100	1.89743e-11		ME2m	99.8245	1.19595		ACHEe	95.5118	9.49467		OIVD2m	98.0317	6.62697
ACGALFUCGALACGALFUCGALACGLCGAL14ACGLCGALGLUSIDEtg	100		GGH-10FTHF6GLUl	100	1.92028e-11		PEPCK	99.8245	1.19595		ACHVESSEC	95.5118	9.49467		VALt5m	98.0317	6.62697
ACGALtly	100		GHMT2r	100	2.08248e-11		PEPCKm	99.8245	1.19595		ACITL	95.5118	9.49467		VALTAm	98.0317	6.62697
ACGAM2E	100		PI345P5P	100	2.127e-11		PYRt2m	99.8245	1.19595		ACN13ACNGALGBSIDEte	95.5118	9.49467		MTHFC	98.0374	6.62821
ACGAM6PSi	100		35CGMPtn	100	2.16215e-11		SUCCt2m	99.8245	1.19595		ACN13ACNGALGBSIDEtg	95.5118	9.49467		G5SADrm	98.0416	6.62545
ACGAMK	100		5DHFtl	100	2.16215e-11		MTHFC	99.8248	1.19592		ACN23ACNGALGBSIDEte	95.5118	9.49467		EX_ps_hs(e)	98.0626	6.62488
ACGAMPM	100		5THFtm	100	2.16215e-11		10FTHF5GLUtl	99.8249	1.19593		ACN23ACNGALGBSIDEtg	95.5118	9.49467		PSSA1_hs	98.07	6.62451
ACGAMtly	100		6DHFtl	100	2.16215e-11		10FTHF5GLUtm	99.8249	1.19593		ACNACNGAL14ACGLCGALGLUSIDEte	95.5118	9.49467		ACOAD8m	98.0708	6.62449
ACGPID	100		ABTD	100	2.16215e-11		10FTHF6GLUtl	99.8249	1.19593		ACNACNGAL14ACGLCGALGLUSIDEtg	95.5118	9.49467		HCO3Em	98.0708	6.62449
ACHEe	100		ABUTD	100	2.16215e-11		10FTHF6GLUtm	99.8249	1.19593		ACNACNGALGBSIDEte	95.5118	9.49467		MCCCrm	98.0708	6.62449
ACHVESSEC	100		ARGSL	100	2.16215e-11		10FTHF7GLUtl	99.8249	1.19593		ACNACNGALGBSIDEtg	95.5118	9.49467		MGCHrm	98.0708	6.62449
ACITL	100		ARGSS	100	2.16215e-11		10FTHF7GLUtm	99.8249	1.19593		ACNAM9PL	95.5118	9.49467		OIVD1m	98.0708	6.62449
ACN13ACNGALGBSIDEte	100		ARTFR32	100	2.16215e-11		10FTHFtl	99.8249	1.19593		ACNAM9PL2	95.5118	9.49467		EX_no(e)	98.0768	6.62441
ACN13ACNGALGBSIDEtg	100		ARTFR33	100	2.16215e-11		10FTHFtm	99.8249	1.19593		ACNAMlt	95.5118	9.49467		NOS1	98.0768	6.62441
ACN23ACNGALGBSIDEte	100		ARTFR44	100	2.16215e-11		13DAMPPOX	99.8249	1.19593		ACNAMPH	95.5118	9.49467		NOS2	98.0768	6.62441
ACN23ACNGALGBSIDEtg	100		DESAT18_3	100	2.16215e-11		1a,24,25VITD2Hm	99.8249	1.19593		ACNAMtn	95.5118	9.49467		NOt	98.0768	6.62441
ACNACNGAL14ACGLCGALGLUSIDEte	100		DESAT18_8	100	2.16215e-11		1a,24,25VITD3Hm	99.8249	1.19593		ACNGALACGLCGAL14ACGLCGALGLUSIDEte	95.5118	9.49467		EX_pe_hs(e)	98.0785	6.62443
ACNACNGAL14ACGLCGALGLUSIDEtg	100		DOLK_L	100	2.16215e-11		1a,25VITD2Hm	99.8249	1.19593		ACNGALACGLCGAL14ACGLCGALGLUSIDEtg	95.5118	9.49467		EX_spc_hs(e)	98.0787	6.62443
ACNACNGALGBSIDEte	100		DOLK_U	100	2.16215e-11		1a,25VITD3Hm	99.8249	1.19593		ACOAD10m	95.5118	9.49467		SPC_HSt	98.0787	6.62443
ACNACNGALGBSIDEtg	100		ESTSULT	100	2.16215e-11		1MNCAMti	99.8249	1.19593		ACOAD1fm	95.5118	9.49467		PSDm_hs	98.086	6.62466
ACNAM9PL	100		EX_inost(e)	100	2.15998e-11		24,25DHVITD2t	99.8249	1.19593		ACOAHi	95.5118	9.49467		PSFLIPm	98.086	6.62466
ACNAM9PL2	100		EX_nh4(e)	100	2.16215e-11		24,25DHVITD2tm	99.8249	1.19593		ACOATA	95.5118	9.49467		ACGAM6PSi	98.0908	6.62495
ACNAMlt	100		FACOAL160i	100	2.16215e-11		24,25DHVITD3t	99.8249	1.19593		ACODA	95.5118	9.49467		EX_ha_pre1(e)	98.0908	6.62495
ACNAMPH	100		FACOAL180i	100	2.15179e-11		24,25DHVITD3tm	99.8249	1.19593		ACONT	95.5118	9.49467		EX_ha(e)	98.0908	6.62495
ACNAMtn	100		GMPtn	100	2.16215e-11		24,25VITD2Hm	99.8249	1.19593		ACOX22x	95.5118	9.49467		ASAH1	98.0912	6.62498
ACNGALACGLCGAL14ACGLCGALGLUSIDEte	100		MI14PP	100	2.16215e-11		24,25VITD3Hm	99.8249	1.19593		ACOX2x	95.5118	9.49467		CHOLPtl	98.0912	6.62498
ACNGALACGLCGAL14ACGLCGALGLUSIDEtg	100		MI4PP	100	2.16215e-11		24NPHte	99.8249	1.19593		ACP1(FMN)	95.5118	9.49467		Rtotaltl	98.0912	6.62498
ACNMLr	100		NTD8	100	2.16215e-11		25HVITD2t	99.8249	1.19593		ACRNtm	95.5118	9.49467		SMPD3l	98.0912	6.62498
ACOAD10m	100		ORNDC	100	2.16215e-11		25HVITD2tin	99.8249	1.19593		ACS	95.5118	9.49467		SPHINGStl	98.0912	6.62498
ACOAD1fm	100		PDE4n	100	2.16215e-11		25HVITD2tin-m	99.8249	1.19593		ACS2	95.5118	9.49467		SPHMYLNtl	98.0912	6.62498
ACOAD8m	100		PGLYCt	100	2.16215e-11		25HVITD2tm	99.8249	1.19593		ACSm	95.5118	9.49467		METS	98.114	6.62802
ACOAHi	100		PI3P5K	100	2.16215e-11		25HVITD3t	99.8249	1.19593		ACtg	95.5118	9.49467		MTHFR3	98.1178	6.62879
ACOAO7p	100		PI45PLC	100	2.16215e-11		25HVITD3tin	99.8249	1.19593		ACTNMO	95.5118	9.49467		AHCYStr	98.1245	6.6303
ACOATA	100		PI4PLC	100	2.16215e-11		25HVITD3tin-m	99.8249	1.19593		ACYP	95.5118	9.49467		AMETr	98.1245	6.6303
ACODA	100		PIPLC	100	2.16215e-11		25HVITD3tm	99.8249	1.19593		ADA	95.5118	9.49467		PCHOL_HSter	98.1245	6.6303
ACONT	100		PLA2_2e	100	2.16215e-11		25VITD2Hm	99.8249	1.19593		ADEtl	95.5118	9.49467		PE_HSter	98.1245	6.6303
ACONTm	100		PTRCOX1	100	2.16215e-11		25VITD3Hm	99.8249	1.19593		ADHAPtx	95.5118	9.49467		PETOHMr_hs	98.1245	6.6303
ACOX22x	100		ASNNm	100	2.16514e-11		2DR1PP	99.8249	1.19593		ADMDC	95.5118	9.49467		GLNS	98.1274	6.63105
ACOX2x	100		ASNtm	100	2.16514e-11		2HCO3_NAt	99.8249	1.19593		ADNCYC	95.5118	9.49467		EX_chol(e)	98.13	6.63172
ACP1(FMN)	100		FACOAL1812	100	2.19764e-11		2OXOADOXm	99.8249	1.19593		ADNK1	95.5118	9.49467		CYOR-u10m	98.132	6.63227
ACRNtm	100		GF6PTA	100	2.23338e-11		2OXOADPTm	99.8249	1.19593		ADNK1m	95.5118	9.49467		10FTHF5GLUtl	98.132	6.63227
ACS	100		NTD11	100	2.2295e-11		34DHPHAMT	99.8249	1.19593		ADNt	95.5118	9.49467		10FTHF5GLUtm	98.132	6.63227
ACS2	100		PDE1	100	2.2195e-11		34DHPLACOX	99.8249	1.19593		ADNt4	95.5118	9.49467		10FTHF6GLUtl	98.132	6.63227
ACSm	100		METS	100	2.48575e-11		34DHPLACOX(NADP)	99.8249	1.19593		ADNt5	95.5118	9.49467		10FTHF6GLUtm	98.132	6.63227
ACt2m	100		PGCD	100	2.44648e-11		34HPLFM	99.8249	1.19593		ADNtl	95.5118	9.49467		10FTHF7GLUtl	98.132	6.63227
ACt2r	100		PSERT	100	2.44648e-11		35CGMPtn	99.8249	1.19593		ADNtm	95.5118	9.49467		10FTHF7GLUtm	98.132	6.63227
ACtg	100		PSP_L	100	2.44648e-11		3DPHBH1	99.8249	1.19593		ADPGLC	95.5118	9.49467		10FTHFtl	98.132	6.63227
ACTLMO	100		DURIK1	100	2.4785e-11		3DPHBH2	99.8249	1.19593		ADPMAN	95.5118	9.49467		10FTHFtm	98.132	6.63227
ACTNMO	100		CITL	100	2.50063e-11		3HAO	99.8249	1.19593		ADPRDP	95.5118	9.49467		13DAMPPOX	98.132	6.63227
ACYP	100		PYDXNK	100	2.50662e-11		3HBCDm	99.8249	1.19593		ADPRDPm	95.5118	9.49467		1a,24,25VITD2Hm	98.132	6.63227
ADA	100		PYDXPP	100	2.50662e-11		3HCO3_NAt	99.8249	1.19593		ADPRIBt	95.5118	9.49467		1a,24,25VITD3Hm	98.132	6.63227
ADAe	100		TYRt	100	2.51717e-11		3HLYTCL	99.8249	1.19593		ADPT	95.5118	9.49467		1a,25VITD2Hm	98.132	6.63227
ADCim	100		FALDtly	100	2.55634e-11		3HPCOAHYD	99.8249	1.19593		ADRNt	95.5118	9.49467		1a,25VITD3Hm	98.132	6.63227
ADEt	100		GLDBRAN	100	2.55231e-11		3HXKYNDCL	99.8249	1.19593		ADSELK	95.5118	9.49467		1MNCAMti	98.132	6.63227
ADEtl	100		GLPASE1	100	2.55231e-11		3HXKYNOXDA	99.8249	1.19593		AFLATOXINte	95.5118	9.49467		24,25DHVITD2t	98.132	6.63227
ADHAPtx	100		GLPASE2	100	2.55231e-11		3M4HDXPAC	99.8249	1.19593		AG13T16g	95.5118	9.49467		24,25DHVITD2tm	98.132	6.63227
ADK1	100		H2O2tly	100	2.55634e-11		3MOBt2im	99.8249	1.19593		AG13T17g	95.5118	9.49467		24,25DHVITD3t	98.132	6.63227
ADK1m	100		MEOHtly	100	2.55634e-11		3MOPt2im	99.8249	1.19593		AG13T18g	95.5118	9.49467		24,25DHVITD3tm	98.132	6.63227
ADK3	100		PRDXl	100	2.55634e-11		3MOX4HOXPGALDOX	99.8249	1.19593		AG13T1g	95.5118	9.49467		24,25VITD2Hm	98.132	6.63227
ADK3m	100		SPHK21c	100	2.69481e-11		3MOX4HOXPGALDOX(NADP)	99.8249	1.19593		AG13T2g	95.5118	9.49467		24,25VITD3Hm	98.132	6.63227
ADKd	100		1MNCAMti	100	2.6658e-11		3MOXTYROX	99.8249	1.19593		AG13T3g	95.5118	9.49467		24NPHte	98.132	6.63227
ADMDC	100		EX_1mncam(e)	100	2.6658e-11		3NTD7l	99.8249	1.19593		AGLPC	95.5118	9.49467		25HVITD2t	98.132	6.63227
ADNCYC	100		NNMT	100	2.6658e-11		3SALAASPm	99.8249	1.19593		AGLPED	95.5118	9.49467		25HVITD2tin	98.132	6.63227
ADNK1	100		ACt2r	100	2.7636e-11		3SALATAi	99.8249	1.19593		AGLPET	95.5118	9.49467		25HVITD2tin-m	98.132	6.63227
ADNK1m	100		C181CPT1	100	2.774e-11		3SALATAim	99.8249	1.19593		AGLPH	95.5118	9.49467		25HVITD2tm	98.132	6.63227
ADNt	100		C181CPT2	100	2.774e-11		41R1H2MAE12BOOX	99.8249	1.19593		AGLPR	95.5118	9.49467		25HVITD3t	98.132	6.63227
ADNt4	100		C181CRNt	100	2.774e-11		41R2A1H12BOOX	99.8249	1.19593		AGLPT	95.5118	9.49467		25HVITD3tin	98.132	6.63227
ADNt5	100		FAOXC1811603m	100	2.774e-11		42A12BOOX	99.8249	1.19593		AGMTm	95.5118	9.49467		25HVITD3tin-m	98.132	6.63227
ADNtl	100		ETF	100	2.82123e-11		4ABUTtm	99.8249	1.19593		AGPex	95.5118	9.49467		25HVITD3tm	98.132	6.63227
ADNtm	100		ETFQO	100	2.82123e-11		4HBZCOAFm	99.8249	1.19593		AGPRim	95.5118	9.49467		25VITD2Hm	98.132	6.63227
ADPGLC	100		SBTD_D2	100	2.91421e-11		4HBZFm	99.8249	1.19593		AGPSx	95.5118	9.49467		25VITD3Hm	98.132	6.63227
ADPMAN	100		SBTR	100	2.91421e-11		4HDEBRISOQUINEte	99.8249	1.19593		AHANDROSTANGLCte	95.5118	9.49467		2DR1PP	98.132	6.63227
ADPRDP	100		ACACT1r	100	2.92825e-11		4HGLSDm	99.8249	1.19593		AHANDROSTANGLCtr	95.5118	9.49467		2HCO3_NAt	98.132	6.63227
ADPRDPm	100		HMGCOASi	100	2.96765e-11		4HOXPACDOX(NADP)	99.8249	1.19593		AHCYStn	95.5118	9.49467		2OXOADOXm	98.132	6.63227
ADPRIBt	100		NADPHtru	100	2.98592e-11		4MOPt2im	99.8249	1.19593		AHEXASEly	95.5118	9.49467		2OXOADPTm	98.132	6.63227
ADPT	100		EX_lac-D(e)	100	3.04165e-11		4MPTNLte	99.8249	1.19593		AKGtp	95.5118	9.49467		34DHPHAMT	98.132	6.63227
ADPtx	100		PItn	100	3.08081e-11		4MPTNLtm	99.8249	1.19593		AKR1C41	95.5118	9.49467		34DHPLACOX	98.132	6.63227
ADRNCOAtx	100		CBR2	100	3.1239e-11		4MPTNLtr	99.8249	1.19593		AKR1C42	95.5118	9.49467		34DHPLACOX(NADP)	98.132	6.63227
ADRNCPT1	100		EX_prostgf2(e)	100	3.1239e-11		4NPHSFte	99.8249	1.19593		ALASm	95.5118	9.49467		34HPLFM	98.132	6.63227
ADRNCPT2	100		PROSTGF2t	100	3.1239e-11		4NPHSULT	99.8249	1.19593		ALAt2r	95.5118	9.49467		35CGMPtn	98.132	6.63227
ADRNCRNt	100		EX_ac(e)	100	3.12526e-11		4NPHte	99.8249	1.19593		ALAt2rL	95.5118	9.49467		3DPHBH1	98.132	6.63227
ADRNLPVESSEC	100		ACOAO7p	100	3.18581e-11		4PYRDX	99.8249	1.19593		ALAt4	95.5118	9.49467		3DPHBH2	98.132	6.63227
ADRNt	100		HDD2COAtx	100	3.18581e-11		5ADTSTSTERONEGLCte	99.8249	1.19593		ALAtN1	95.5118	9.49467		3HAO	98.132	6.63227
ADSELK	100		PYDAMK	100	3.16578e-11		5ADTSTSTERONEGLCtr	99.8249	1.19593		ALCD2yf	95.5118	9.49467		3HBCDm	98.132	6.63227
ADSK	100		ESTRONESt	100	3.19244e-11		5ADTSTSTERONEte	99.8249	1.19593		ALDD20x	95.5118	9.49467		3HCO3_NAt	98.132	6.63227
AFLATOXINte	100		ARTFR46	100	3.22273e-11		5ADTSTSTERONEtr	99.8249	1.19593		ALDD20xm	95.5118	9.49467		3HLYTCL	98.132	6.63227
AG13T10g	100		EX_leuktrB4(e)	100	3.22239e-11		5DHFtl	99.8249	1.19593		ALDD21	95.5118	9.49467		3HPCOAHYD	98.132	6.63227
AG13T11g	100		LEUKTRB4t	100	3.22239e-11		5FTHFt2	99.8249	1.19593		ALDD2x	95.5118	9.49467		3HXKYNDCL	98.132	6.63227
AG13T12g	100		LTA4H	100	3.22239e-11		5HOXINDACTO2OX	99.8249	1.19593		ALDD2xm	95.5118	9.49467		3HXKYNOXDA	98.132	6.63227
AG13T13g	100		EX_succ(e)	100	3.28932e-11		5HOXINDACTOX	99.8249	1.19593		ALDD2y	95.5118	9.49467		3M4HDXPAC	98.132	6.63227
AG13T14g	100		ACOAHi	100	3.38646e-11		5HOXINDACTOXm	99.8249	1.19593		ALDSTRNte	95.5118	9.49467		3MOBt2im	98.132	6.63227
AG13T15g	100		CHLP	100	3.38646e-11		5HOXINOXDA	99.8249	1.19593		ALKP	95.5118	9.49467		3MOPt2im	98.132	6.63227
AG13T16g	100		PSFLIP	100	3.38646e-11		5HTRPDOX	99.8249	1.19593		ALOX12	95.5118	9.49467		3MOX4HOXPGALDOX	98.132	6.63227
AG13T17g	100		G3PD2m	100	3.47071e-11		5HXKYNDCL	99.8249	1.19593		ALOX12R	95.5118	9.49467		3MOX4HOXPGALDOX(NADP)	98.132	6.63227
AG13T18g	100		STS2	100	3.54359e-11		5HXKYNOXDA	99.8249	1.19593		ALOX15	95.5118	9.49467		3MOXTYROX	98.132	6.63227
AG13T1g	100		NTD2	100	3.56868e-11		5MTHFt	99.8249	1.19593		AM6SAD	95.5118	9.49467		3NTD7l	98.132	6.63227
AG13T2g	100		EX_cit(e)	100	3.69108e-11		5MTHFt2	99.8249	1.19593		AMACR2p	95.5118	9.49467		3SALAASPm	98.132	6.63227
AG13T3g	100		NTD3	100	3.7234e-11		5THFtl	99.8249	1.19593		AMACR2r	95.5118	9.49467		3SALATAi	98.132	6.63227
AG13T4g	100		O2tp	100	3.7289e-11		5THFtm	99.8249	1.19593		AMACRp	95.5118	9.49467		3SALATAim	98.132	6.63227
AG13T5g	100		CAATPS	100	3.7676e-11		6DHFtl	99.8249	1.19593		AMACRr	95.5118	9.49467		41R1H2MAE12BOOX	98.132	6.63227
AG13T6g	100		ARTFR34	100	3.7695e-11		6DHFtm	99.8249	1.19593		AMANK	95.5118	9.49467		41R2A1H12BOOX	98.132	6.63227
AG13T7g	100		SADT	100	3.8502e-11		6HTSTSTERONEte	99.8249	1.19593		AMCOXO	95.5118	9.49467		42A12BOOX	98.132	6.63227
AG13T8g	100		EX_ak2lgchol_hs(e)	100	3.85114e-11		6THFtl	99.8249	1.19593		AMETtn	95.5118	9.49467		4ABUTtm	98.132	6.63227
AG13T9g	100		PYDXK	100	3.84816e-11		6THFtm	99.8249	1.19593		AMPTASECG	95.5118	9.49467		4HBZCOAFm	98.132	6.63227
AGLPC	100		DPCOAK	100	3.87394e-11		7DHCHSTEROLtr	99.8249	1.19593		AMPtp	95.5118	9.49467		4HBZFm	98.132	6.63227
AGLPED	100		H2O2tp	100	3.90396e-11		7DHFtl	99.8249	1.19593		AMPtr	95.5118	9.49467		4HDEBRISOQUINEte	98.132	6.63227
AGLPET	100		CATm	100	3.91916e-11		7DHFtm	99.8249	1.19593		AMY1e	95.5118	9.49467		4HGLSDm	98.132	6.63227
AGLPH	100		PROSTGE1t	100	4.02557e-11		7THFtl	99.8249	1.19593		AMY2e	95.5118	9.49467		4HOXPACDOX(NADP)	98.132	6.63227
AGLPR	100		PROSTGE1t3	100	4.02557e-11		7THFtm	99.8249	1.19593		ANDRSTRNte	95.5118	9.49467		4MOPt2im	98.132	6.63227
AGLPT	100		EX_creat(e)	100	4.06945e-11		A_MANASE	99.8249	1.19593		ANDRSTRNtr	95.5118	9.49467		4MPTNLte	98.132	6.63227
AGMTm	100		O2tm	100	4.03011e-11		A_MANASEly	99.8249	1.19593		AP4AH1	95.5118	9.49467		4MPTNLtm	98.132	6.63227
AGPAT1	100		ARGNm	100	4.08805e-11		A4GALTc	99.8249	1.19593		APRTO2	95.5118	9.49467		4MPTNLtr	98.132	6.63227
AGPex	100		ARGtm	100	4.08805e-11		A4GALTg	99.8249	1.19593		AQCOBALt	95.5118	9.49467		4NPHSFte	98.132	6.63227
AGPRim	100		DEDOLP1_L	100	4.08654e-11		AACOAT	99.8249	1.19593		ARAB-Lt	95.5118	9.49467		4NPHSULT	98.132	6.63227
AGPSx	100		DEDOLP2_L	100	4.08654e-11		ABO1g	99.8249	1.19593		ARABR	95.5118	9.49467		4NPHte	98.132	6.63227
AHANDROSTANGLCte	100		DEDOLR_L	100	4.08654e-11		ABO2g	99.8249	1.19593		ARACHDt2	95.5118	9.49467		4PYRDX	98.132	6.63227
AHANDROSTANGLCtr	100		GGT_L	100	4.08654e-11		ABO3g	99.8249	1.19593		ARACHt	95.5118	9.49467		5ADTSTSTERONEGLCte	98.132	6.63227
AHCYStn	100		UREAtm	100	4.08805e-11		ABO4g	99.8249	1.19593		ARGDCm	95.5118	9.49467		5ADTSTSTERONEGLCtr	98.132	6.63227
AHCYStr	100		EX_retinol-cis-11(e)	100	4.08428e-11		ABO5g	99.8249	1.19593		ARGN	95.5118	9.49467		5ADTSTSTERONEte	98.132	6.63227
AHEXASE2ly	100		RETH2e	100	4.08428e-11		ABO6g	99.8249	1.19593		ARGNm	95.5118	9.49467		5ADTSTSTERONEtr	98.132	6.63227
AHEXASEly	100		DEDOLP1_U	100	4.13898e-11		ABO7g	99.8249	1.19593		ARGt4	95.5118	9.49467		5DHFtl	98.132	6.63227
AK2LGCHOLt	100		DEDOLP2_U	100	4.13898e-11		ABO8g	99.8249	1.19593		ARGtiDF	95.5118	9.49467		5FTHFt2	98.132	6.63227
AKGDm	100		DEDOLR_U	100	4.13898e-11		ABO9g	99.8249	1.19593		ARGtm	95.5118	9.49467		5HOXINDACTO2OX	98.132	6.63227
AKGMALtm	100		GGT_U	100	4.13898e-11		ABTArm	99.8249	1.19593		ARSA	95.5118	9.49467		5HOXINDACTOX	98.132	6.63227
AKGt4_3	100		FPGS4	100	4.22066e-11		ABTD	99.8249	1.19593		ARTFR202	95.5118	9.49467		5HOXINDACTOXm	98.132	6.63227
AKGtp	100		CHOLK	100	4.22171e-11		ABTti	99.8249	1.19593		ARTFR203	95.5118	9.49467		5HOXINOXDA	98.132	6.63227
AKR1C41	100		DGK1	100	4.2808e-11		ABUTD	99.8249	1.19593		ARTFR204	95.5118	9.49467		5HTRPDOX	98.132	6.63227
AKR1C42	100		ME2m	100	4.29771e-11		ABUTt2r	99.8249	1.19593		ARTFR205	95.5118	9.49467		5HXKYNDCL	98.132	6.63227
ALAASNNaEx	100		NADH2-u10m	100	4.51554e-11		ABUTt2rL	99.8249	1.19593		ARTFR208	95.5118	9.49467		5HXKYNOXDA	98.132	6.63227
ALACYSNaEx	100		O2ter	100	4.52715e-11		ABUTt4(2)r	99.8249	1.19593		ARTFR210	95.5118	9.49467		5MTHFt	98.132	6.63227
ALADGLNexR	100		RETFAt2	100	4.59499e-11		ACACT1	99.8249	1.19593		ARTFR211	95.5118	9.49467		5MTHFt2	98.132	6.63227
ALADGLYexR	100		EX_o2s(e)	100	4.59575e-11		ACACT10m	99.8249	1.19593		ARTFR212	95.5118	9.49467		5THFtl	98.132	6.63227
ALAGLNexR	100		EX_gluala(e)	100	4.58979e-11		ACACT1r	99.8249	1.19593		ARTFR42	95.5118	9.49467		5THFtm	98.132	6.63227
ALAGLNNaEx	100		ARTPLM3	100	4.59295e-11		ACACT1rm	99.8249	1.19593		ARTFR43	95.5118	9.49467		6DHFtl	98.132	6.63227
ALAGLYexR	100		EX_ala-L(e)	100	4.5886e-11		ACACT1x	99.8249	1.19593		ARTFR44	95.5118	9.49467		6DHFtm	98.132	6.63227
ALAR	100		AMPDA	100	4.58629e-11		ACACt2	99.8249	1.19593		ARTFR45	95.5118	9.49467		6HTSTSTERONEte	98.132	6.63227
ALASERNaEx	100		NTD9	100	4.57533e-11		ACACt2m	99.8249	1.19593		ARTFR61	95.5118	9.49467		6THFtl	98.132	6.63227
ALASm	100		FACOAL181i	100	4.56946e-11		ACACT4p	99.8249	1.19593		ARTPLM1m	95.5118	9.49467		6THFtm	98.132	6.63227
ALAt2r	100		ARGN	100	4.54899e-11		ACACT5p	99.8249	1.19593		ARTPLM2m	95.5118	9.49467		7DHCHSTEROLtr	98.132	6.63227
ALAt2rL	100		PIter	100	4.53092e-11		ACACT6p	99.8249	1.19593		ARTPLM3m	95.5118	9.49467		7DHFtl	98.132	6.63227
ALAt4	100		DNADtn	100	4.52533e-11		ACACT7p	99.8249	1.19593		ASNALANaEx	95.5118	9.49467		7DHFtm	98.132	6.63227
ALATA_L	100		NADtn	100	4.52534e-11		ACACT8p	99.8249	1.19593		ASNCYSNaEx	95.5118	9.49467		7THFtl	98.132	6.63227
ALATHRNaEx	100		NICRNTtn	100	4.52533e-11		ACACT9p	99.8249	1.19593		ASNGLNNaEx	95.5118	9.49467		7THFtm	98.132	6.63227
ALAtN1	100		NMNATn	100	4.52534e-11		ACACtx	99.8249	1.19593		ASNNm	95.5118	9.49467		A_MANASE	98.132	6.63227
ALCD1	100		NMNtn	100	4.52534e-11		ACALDt	99.8249	1.19593		ASNSERNaEx	95.5118	9.49467		A_MANASEly	98.132	6.63227
ALCD21_D	100		NNATn	100	4.52533e-11		ACALDtm	99.8249	1.19593		ASNt4	95.5118	9.49467		A4GALTc	98.132	6.63227
ALCD21_L	100		DURIPP	100	4.52241e-11		ACALDtr	99.8249	1.19593		ASNTHRNaEx	95.5118	9.49467		A4GALTg	98.132	6.63227
ALCD22_D	100		FAOXC204	100	4.50623e-11		ACALDtx	99.8249	1.19593		ASNtm	95.5118	9.49467		AACOAT	98.132	6.63227
ALCD22_L	100		FTHFDH	100	4.4513e-11		ACCOAC	99.8249	1.19593		ASNtN1	95.5118	9.49467		ABO1g	98.132	6.63227
ALCD2yf	100		ACETONEt2	100	4.37912e-11		ACCOACm	99.8249	1.19593		ASPDt6	95.5118	9.49467		ABO2g	98.132	6.63227
ALDD20x	100		BILDGLCURte	100	4.37912e-11		ACCOAgt	99.8249	1.19593		ASPDxt	95.5118	9.49467		ABO3g	98.132	6.63227
ALDD20xm	100		BILGLCURte	100	4.37912e-11		ACCOAL	99.8249	1.19593		ASPt6	95.5118	9.49467		ABO4g	98.132	6.63227
ALDD21	100		DUTPDPm	100	4.37912e-11		ACCOALm	99.8249	1.19593		ATP1ter	95.5118	9.49467		ABO5g	98.132	6.63227
ALDD2x	100		ESTRADIOLGLCt2	100	4.37912e-11		ACCOAtn	99.8249	1.19593		ATP2ter	95.5118	9.49467		ABO6g	98.132	6.63227
ALDD2xm	100		ETHAK	100	4.37912e-11		ACCOAtr	99.8249	1.19593		ATPH1e	95.5118	9.49467		ABO7g	98.132	6.63227
ALDD2y	100		ETHP	100	4.37912e-11		ACETONEt2	99.8249	1.19593		ATPH2e	95.5118	9.49467		ABO8g	98.132	6.63227
ALDSTRNte	100		PI34P3Pn	100	4.37912e-11		ACETONEt2m	99.8249	1.19593		AVITE1t	95.5118	9.49467		ABO9g	98.132	6.63227
ALKP	100		PI34P5K	100	4.37912e-11		ACGAGBSIDEtg	99.8249	1.19593		AVITE2t	95.5118	9.49467		ABTArm	98.132	6.63227
ALOX12	100		PI3P4Kn	100	4.37912e-11		ACGAGBSIDEtl	99.8249	1.19593		B3GALT41g	95.5118	9.49467		ABTD	98.132	6.63227
ALOX12R	100		PI3PP	100	4.37912e-11		ACGALFUCGALACGALFUC12GAL14ACGLCGALGLUSIDEte	99.8249	1.19593		B3GALT42g	95.5118	9.49467		ABTti	98.132	6.63227
ALOX15	100		PI45P4P	100	4.37912e-11		ACGALFUCGALACGALFUC12GAL14ACGLCGALGLUSIDEtg	99.8249	1.19593		B3GALT43g	95.5118	9.49467		ABUTD	98.132	6.63227
ALOX5	100		PI45P5P	100	4.37912e-11		ACGALFUCGALACGALFUCGALACGLCGAL14ACGLCGALGLUSIDEte	99.8249	1.19593		B3GALT44g	95.5118	9.49467		ABUTt2r	98.132	6.63227
ALOX52	100		PI45P5Pn	100	4.37912e-11		ACGALFUCGALACGALFUCGALACGLCGAL14ACGLCGALGLUSIDEtg	99.8249	1.19593		B3GNT11g	95.5118	9.49467		ABUTt2rL	98.132	6.63227
ALR	100		PI4P3Kn	100	4.37912e-11		ACGALtly	99.8249	1.19593		B3GNT12g	95.5118	9.49467		ABUTt4(2)r	98.132	6.63227
ALR2	100		PI4P4Pn	100	4.37912e-11		ACGAM2E	99.8249	1.19593		B3GNT51g	95.5118	9.49467		ACACT1	98.132	6.63227
ALR3	100		PI4P5K	100	4.37912e-11		ACGAM6PSi	99.8249	1.19593		BAMPPALDOX	95.5118	9.49467		ACACT10m	98.132	6.63227
AM6SAD	100		PI4P5Kn	100	4.37912e-11		ACGAMK	99.8249	1.19593		BAMPPALDOXm	95.5118	9.49467		ACACT1r	98.132	6.63227
AMACR2p	100		PI4PP	100	4.37912e-11		ACGAMPM	99.8249	1.19593		BBHOX	95.5118	9.49467		ACACT1rm	98.132	6.63227
AMACR2r	100		PI5P3K	100	4.37912e-11		ACGAMtly	99.8249	1.19593		BDHm	95.5118	9.49467		ACACT1x	98.132	6.63227
AMACRp	100		PIK3	100	4.37912e-11		ACGPID	99.8249	1.19593		BDMT_U	95.5118	9.49467		ACACt2	98.132	6.63227
AMACRr	100		PIK3n	100	4.37912e-11		ACHEe	99.8249	1.19593		BETALDHx	95.5118	9.49467		ACACt2m	98.132	6.63227
AMANK	100		PIK4	100	4.37912e-11		ACHVESSEC	99.8249	1.19593		BETALDHxm	95.5118	9.49467		ACACT4p	98.132	6.63227
AMCOXO	100		PIK4n	100	4.37912e-11		ACITL	99.8249	1.19593		BHBtm	95.5118	9.49467		ACACT5p	98.132	6.63227
AMETr	100		PLA2_2	100	4.37912e-11		ACN13ACNGALGBSIDEte	99.8249	1.19593		BILDGLCURte	95.5118	9.49467		ACACT6p	98.132	6.63227
AMETt2m	100		URIDK2m	100	4.37912e-11		ACN13ACNGALGBSIDEtg	99.8249	1.19593		BILIRED	95.5118	9.49467		ACACT7p	98.132	6.63227
AMETtn	100		PI34P5Kn	100	4.37397e-11		ACN23ACNGALGBSIDEte	99.8249	1.19593		BMTer_L	95.5118	9.49467		ACACT8p	98.132	6.63227
AMPDA	100		SMPD4	100	4.35701e-11		ACN23ACNGALGBSIDEtg	99.8249	1.19593		BMTer_U	95.5118	9.49467		ACACT9p	98.132	6.63227
AMPTASECG	100		BDHm	100	4.37313e-11		ACNACNGAL14ACGLCGALGLUSIDEte	99.8249	1.19593		BPNT2	95.5118	9.49467		ACACtx	98.132	6.63227
AMPTASECGe	100		BHBt	100	4.37313e-11		ACNACNGAL14ACGLCGALGLUSIDEtg	99.8249	1.19593		BTNDe	95.5118	9.49467		ACALDt	98.132	6.63227
AMPtp	100		BHBtm	100	4.37313e-11		ACNACNGALGBSIDEte	99.8249	1.19593		BTNDm	95.5118	9.49467		ACALDtm	98.132	6.63227
AMPtr	100		BPNT2	100	4.32365e-11		ACNACNGALGBSIDEtg	99.8249	1.19593		BTNPL	95.5118	9.49467		ACALDtr	98.132	6.63227
AMY1e	100		UDPGLCAter	100	4.29059e-11		ACNAM9PL	99.8249	1.19593		BTNPLm	95.5118	9.49467		ACALDtx	98.132	6.63227
AMY2e	100		UMPtr	100	4.26559e-11		ACNAM9PL2	99.8249	1.19593		BTNt2m	95.5118	9.49467		ACCOAC	98.132	6.63227
ANDRSTRNGLCte	100		EX_tymsf(e)	100	4.25308e-11		ACNAMlt	99.8249	1.19593		BTNt3i	95.5118	9.49467		ACCOACm	98.132	6.63227
ANDRSTRNGLCtr	100		TYMSFt	100	4.25308e-11		ACNAMPH	99.8249	1.19593		BTNt4i	95.5118	9.49467		ACCOAgt	98.132	6.63227
ANDRSTRNte	100		TYMSULT	100	4.25308e-11		ACNAMtn	99.8249	1.19593		BUTt2m	95.5118	9.49467		ACCOAL	98.132	6.63227
ANDRSTRNtr	100		EX_glc(e)	100	4.24209e-11		ACNGALACGLCGAL14ACGLCGALGLUSIDEte	99.8249	1.19593		BUTt2r	95.5118	9.49467		ACCOALm	98.132	6.63227
AP4AH1	100		FAOXC80	100	4.23448e-11		ACNGALACGLCGAL14ACGLCGALGLUSIDEtg	99.8249	1.19593		BVITEt	95.5118	9.49467		ACCOAtn	98.132	6.63227
APAT2rm	100		NTD4	100	4.17477e-11		ACNMLr	99.8249	1.19593		BZt	95.5118	9.49467		ACCOAtr	98.132	6.63227
APRTO2	100		FAOXC16080m	100	4.08081e-11		ACOAD10m	99.8249	1.19593		BZtr	95.5118	9.49467		ACETONEt2	98.132	6.63227
AQCOBALt	100		PCHOLP_hs	100	4.06892e-11		ACOAD1fm	99.8249	1.19593		C160CPT1	95.5118	9.49467		ACETONEt2m	98.132	6.63227
ARAB-Lt	100		EX_leuktrE4(e)	100	4.04618e-11		ACOAD8m	99.8249	1.19593		C160CPT2	95.5118	9.49467		ACGAGBSIDEtg	98.132	6.63227
ARABR	100		LEUKTRE4t	100	4.04618e-11		ACOAHi	99.8249	1.19593		C160CRNt	95.5118	9.49467		ACGAGBSIDEtl	98.132	6.63227
ARACHCOAtx	100		FACOAL204	100	3.97945e-11		ACOAO7p	99.8249	1.19593		C161CPT1	95.5118	9.49467		ACGALFUCGALACGALFUC12GAL14ACGLCGALGLUSIDEte	98.132	6.63227
ARACHCPT1	100		NTD6	100	3.97535e-11		ACOATA	99.8249	1.19593		C161CPT12	95.5118	9.49467		ACGALFUCGALACGALFUC12GAL14ACGLCGALGLUSIDEtg	98.132	6.63227
ARACHCPT2	100		NTD7	100	3.96241e-11		ACODA	99.8249	1.19593		C161CPT2	95.5118	9.49467		ACGALFUCGALACGALFUCGALACGLCGAL14ACGLCGALGLUSIDEte	98.132	6.63227
ARACHCRNt	100		NTD5	100	3.93559e-11		ACONT	99.8249	1.19593		C161CPT22	95.5118	9.49467		ACGALFUCGALACGALFUCGALACGLCGAL14ACGLCGALGLUSIDEtg	98.132	6.63227
ARACHDCOAtx	100		NaKt	100	3.92378e-11		ACONTm	99.8249	1.19593		C161CRN2t	95.5118	9.49467		ACGALtly	98.132	6.63227
ARACHDt2	100		ACSm	100	3.88992e-11		ACOX22x	99.8249	1.19593		C161CRNt	95.5118	9.49467		ACGAM2E	98.132	6.63227
ARACHDtr	100		FAOXC183806m	100	3.88774e-11		ACOX2x	99.8249	1.19593		C181CPT1	95.5118	9.49467		ACGAMK	98.132	6.63227
ARACHt	100		FAOXC2251836m	100	3.88774e-11		ACP1(FMN)	99.8249	1.19593		C181CPT2	95.5118	9.49467		ACGAMPM	98.132	6.63227
ARGDCm	100		CBPSam	100	3.83015e-11		ACRNtm	99.8249	1.19593		C181CRNt	95.5118	9.49467		ACGAMtly	98.132	6.63227
ARGLYSex	100		OCBTm	100	3.83307e-11		ACS	99.8249	1.19593		C2M26DCOAHLm	95.5118	9.49467		ACGPID	98.132	6.63227
ARGN	100		DOLGLCP_Uter	100	3.67451e-11		ACS2	99.8249	1.19593		C2M26DCOAHLx	95.5118	9.49467		ACHEe	98.132	6.63227
ARGNm	100		UDPDOLPT_U	100	3.67451e-11		ACSm	99.8249	1.19593		C3STDH1Pr	95.5118	9.49467		ACHVESSEC	98.132	6.63227
ARGSL	100		EX_lgnc(e)	100	3.59218e-11		ACt2m	99.8249	1.19593		C3STDH1r	95.5118	9.49467		ACITL	98.132	6.63227
ARGSS	100		FACOAL240	100	3.59218e-11		ACt2r	99.8249	1.19593		C4STMO2Pr	95.5118	9.49467		ACN13ACNGALGBSIDEte	98.132	6.63227
ARGt4	100		LGNCCOAtx	100	3.59218e-11		ACtg	99.8249	1.19593		C4STMO2r	95.5118	9.49467		ACN13ACNGALGBSIDEtg	98.132	6.63227
ARGtiDF	100		EX_urea(e)	100	3.47399e-11		ACTLMO	99.8249	1.19593		CAATPS	95.5118	9.49467		ACN23ACNGALGBSIDEte	98.132	6.63227
ARGtm	100		ACALDtm	100	3.45665e-11		ACTNMO	99.8249	1.19593		CAMPt	95.5118	9.49467		ACN23ACNGALGBSIDEtg	98.132	6.63227
ARSA	100		ALDD2xm	100	3.45665e-11		ACYP	99.8249	1.19593		CAt7r	95.5118	9.49467		ACNACNGAL14ACGLCGALGLUSIDEte	98.132	6.63227
ARTCOAL1	100		PI34P4Pn	100	3.35212e-11		ADA	99.8249	1.19593		CATm	95.5118	9.49467		ACNACNGAL14ACGLCGALGLUSIDEtg	98.132	6.63227
ARTCOAL2	100		P5CRxm	100	3.31831e-11		ADAe	99.8249	1.19593		CATp	95.5118	9.49467		ACNACNGALGBSIDEte	98.132	6.63227
ARTCOAL3	100		PROtm	100	3.31831e-11		ADCim	99.8249	1.19593		CBL2OR	95.5118	9.49467		ACNACNGALGBSIDEtg	98.132	6.63227
ARTFR11	100		DM_dgtp(m)	100	3.28159e-11		ADEtl	99.8249	1.19593		CBL2tm	95.5118	9.49467		ACNAM9PL	98.132	6.63227
ARTFR12	100		ARTCOAL3	100	3.2098e-11		ADHAPtx	99.8249	1.19593		CBLATm	95.5118	9.49467		ACNAM9PL2	98.132	6.63227
ARTFR13	100		DOLICHOL_Lter	100	3.19657e-11		ADK1	99.8249	1.19593		CBPPer	95.5118	9.49467		ACNAMlt	98.132	6.63227
ARTFR202	100		DOLPH_Ler	100	3.19657e-11		ADK1m	99.8249	1.19593		CBPter	95.5118	9.49467		ACNAMPH	98.132	6.63227
ARTFR203	100		UDPACGALtl	100	3.22683e-11		ADK3	99.8249	1.19593		CBR1	95.5118	9.49467		ACNAMtn	98.132	6.63227
ARTFR204	100		EX_prgstrn(e)	100	3.06902e-11		ADK3m	99.8249	1.19593		CCA_D3t	95.5118	9.49467		ACNGALACGLCGAL14ACGLCGALGLUSIDEte	98.132	6.63227
ARTFR205	100		HSD3B11	100	3.06902e-11		ADMDC	99.8249	1.19593		CEPTE	95.5118	9.49467		ACNGALACGLCGAL14ACGLCGALGLUSIDEtg	98.132	6.63227
ARTFR206	100		PRGSTRNt	100	3.06902e-11		ADNCYC	99.8249	1.19593		CERT1gt	95.5118	9.49467		ACNMLr	98.132	6.63227
ARTFR207	100		DHCRD1	100	3.06475e-11		ADNK1	99.8249	1.19593		CERT1rt	95.5118	9.49467		ACOAD10m	98.132	6.63227
ARTFR208	100		CYANSTm	100	3.04933e-11		ADNt	99.8249	1.19593		CERT2gt	95.5118	9.49467		ACOAD1fm	98.132	6.63227
ARTFR209	100		CYANtm	100	3.04933e-11		ADNt4	99.8249	1.19593		CERT2rt	95.5118	9.49467		ACOAHi	98.132	6.63227
ARTFR210	100		EX_tcynt(e)	100	3.04933e-11		ADNt5	99.8249	1.19593		CGLYt3(2)	95.5118	9.49467		ACOAO7p	98.132	6.63227
ARTFR211	100		MCPST	100	3.04933e-11		ADNtl	99.8249	1.19593		CHLP	95.5118	9.49467		ACOATA	98.132	6.63227
ARTFR212	100		TCYNTt	100	3.04933e-11		ADPGLC	99.8249	1.19593		CHOLD2m	95.5118	9.49467		ACODA	98.132	6.63227
ARTFR213	100		TCYNTtm	100	3.04933e-11		ADPMAN	99.8249	1.19593		CHOLK	95.5118	9.49467		ACONT	98.132	6.63227
ARTFR31	100		10FTHFtl	100	2.98496e-11		ADPRDP	99.8249	1.19593		CHOLPtg	95.5118	9.49467		ACONTm	98.132	6.63227
ARTFR32	100		GGH-10FTHF5GLUl	100	2.98496e-11		ADPRDPm	99.8249	1.19593		CHOLPtl	95.5118	9.49467		ACOX22x	98.132	6.63227
ARTFR33	100		PPM	100	2.88065e-11		ADPRIBt	99.8249	1.19593		CHOLt4	95.5118	9.49467		ACOX2x	98.132	6.63227
ARTFR34	100		GGH-5THFl	100	2.84974e-11		ADPT	99.8249	1.19593		CHOLtg	95.5118	9.49467		ACP1(FMN)	98.132	6.63227
ARTFR41	100		THFtl	100	2.84974e-11		ADPtx	99.8249	1.19593		CHOLtn	95.5118	9.49467		ACRNtm	98.132	6.63227
ARTFR42	100		PSDm_hs	100	2.84328e-11		ADRNCOAtx	99.8249	1.19593		CHOLtr	95.5118	9.49467		ACS	98.132	6.63227
ARTFR43	100		PSFLIPm	100	2.84328e-11		ADRNCPT1	99.8249	1.19593		CHOLtu	95.5118	9.49467		ACS2	98.132	6.63227
ARTFR44	100		10FTHF5GLUtm	100	2.78213e-11		ADRNCPT2	99.8249	1.19593		CHSTEROLt1	95.5118	9.49467		ACSm	98.132	6.63227
ARTFR45	100		ARTCOAL2	100	2.72487e-11		ADRNCRNt	99.8249	1.19593		CHSTEROLtg	95.5118	9.49467		ACt2m	98.132	6.63227
ARTFR46	100		EX_k(e)	100	2.67847e-11		ADRNLPVESSEC	99.8249	1.19593		CHTNASE	95.5118	9.49467		ACt2r	98.132	6.63227
ARTFR61	100		FAS80COA_L	100	2.61168e-11		ADRNt	99.8249	1.19593		CHTNASEe	95.5118	9.49467		ACtg	98.132	6.63227
ARTPLM1	100		BPNT	100	2.58225e-11		ADSELK	99.8249	1.19593		CITt4_2	95.5118	9.49467		ACTLMO	98.132	6.63227
ARTPLM1m	100		AK2LGCHOLt	100	2.58351e-11		ADSK	99.8249	1.19593		CITt4_4	95.5118	9.49467		ACTNMO	98.132	6.63227
ARTPLM2	100		C14STRr	100	2.54594e-11		AFLATOXINte	99.8249	1.19593		CLFORtex	95.5118	9.49467		ACYP	98.132	6.63227
ARTPLM2m	100		C4STMO1r	100	2.54594e-11		AG13T10g	99.8249	1.19593		CLFORtex2	95.5118	9.49467		ADA	98.132	6.63227
ARTPLM3	100		FORtr	100	2.54594e-11		AG13T11g	99.8249	1.19593		CLHCO3tex2	95.5118	9.49467		ADAe	98.132	6.63227
ARTPLM3m	100		FRDPtr	100	2.54594e-11		AG13T12g	99.8249	1.19593		CLHCOtex	95.5118	9.49467		ADCim	98.132	6.63227
ASAH1	100		LNS14DMr	100	2.54594e-11		AG13T13g	99.8249	1.19593		CLI2tex	95.5118	9.49467		ADEtl	98.132	6.63227
ASCBOX	100		LNSTLSr	100	2.54594e-11		AG13T14g	99.8249	1.19593		CLOXAtex2	95.5118	9.49467		ADHAPtx	98.132	6.63227
ASCBt	100		SQLEr	100	2.54594e-11		AG13T15g	99.8249	1.19593		CLPNDCPT1	95.5118	9.49467		ADK1	98.132	6.63227
ASCBt4	100		SQLSr	100	2.54594e-11		AG13T16g	99.8249	1.19593		CLPNDCPT2	95.5118	9.49467		ADK1m	98.132	6.63227
Asn-X-Ser/Thrtr	100		Htr	100	2.52726e-11		AG13T17g	99.8249	1.19593		CLPNDCRNt	95.5118	9.49467		ADK3	98.132	6.63227
ASNALANaEx	100		UGLT	100	2.50455e-11		AG13T18g	99.8249	1.19593		CLPNDt	95.5118	9.49467		ADK3m	98.132	6.63227
ASNCYSNaEx	100		EX_na1(e)	100	2.417e-11		AG13T1g	99.8249	1.19593		CLS_hs	95.5118	9.49467		ADMDC	98.132	6.63227
ASNGLNNaEx	100		DM_datp(n)	100	2.268e-11		AG13T2g	99.8249	1.19593		CMPACNAtn	95.5118	9.49467		ADNCYC	98.132	6.63227
ASNNm	100		PNP	100	2.18687e-11		AG13T3g	99.8249	1.19593		CMPSAS	95.5118	9.49467		ADNK1	98.132	6.63227
ASNS1	100		RNMK	100	2.18687e-11		AG13T4g	99.8249	1.19593		CMPSASn	95.5118	9.49467		ADNt	98.132	6.63227
ASNSERNaEx	100		ACTLMO	100	2.19432e-11		AG13T5g	99.8249	1.19593		CO2tg	95.5118	9.49467		ADNt4	98.132	6.63227
ASNt4	100		FACOAL1813	100	2.12753e-11		AG13T6g	99.8249	1.19593		CO2tn	95.5118	9.49467		ADNt5	98.132	6.63227
ASNTHRNaEx	100		OCDCEAtr	100	2.10235e-11		AG13T7g	99.8249	1.19593		COAtl	95.5118	9.49467		ADNtl	98.132	6.63227
ASNtm	100		CMPACNAtg	100	2.0717e-11		AG13T8g	99.8249	1.19593		COAtn	95.5118	9.49467		ADPGLC	98.132	6.63227
ASNtN1	100		ARTFR13	100	2.05723e-11		AG13T9g	99.8249	1.19593		COAtr	95.5118	9.49467		ADPMAN	98.132	6.63227
ASPDt6	100		FACOAL1822	100	2.05442e-11		AGLPC	99.8249	1.19593		COKECBESr	95.5118	9.49467		ADPRDP	98.132	6.63227
ASPDxt	100		PI345P5Pn	100	2.08101e-11		AGLPED	99.8249	1.19593		COQ3m	95.5118	9.49467		ADPRDPm	98.132	6.63227
ASPGLUm	100		ACACtx	100	2.02408e-11		AGLPET	99.8249	1.19593		COQ5m	95.5118	9.49467		ADPRIBt	98.132	6.63227
ASPt6	100		EX_hestratriol(e)	100	2.02972e-11		AGLPH	99.8249	1.19593		COQ6m	95.5118	9.49467		ADPT	98.132	6.63227
ASPTA	100		HESTRATRIOLte	100	2.02972e-11		AGLPR	99.8249	1.19593		COQ7m	95.5118	9.49467		ADPtx	98.132	6.63227
ASPTAm	100		HESTRATRIOLtr	100	2.02972e-11		AGLPT	99.8249	1.19593		CORE2GTg	95.5118	9.49467		ADRNCOAtx	98.132	6.63227
ATP1ter	100		HMGLx	100	2.02408e-11		AGMTm	99.8249	1.19593		CORE6GTg	95.5118	9.49467		ADRNCPT1	98.132	6.63227
ATP2ter	100		MTHFCm	100	2.02997e-11		AGPAT1	99.8249	1.19593		COt	95.5118	9.49467		ADRNCPT2	98.132	6.63227
ATPasel	100		P4501B1r	100	2.02972e-11		AGPex	99.8249	1.19593		COUCOAFm	95.5118	9.49467		ADRNCRNt	98.132	6.63227
ATPH1e	100		PYNP2r	100	1.98661e-11		AGPRim	99.8249	1.19593		COUMARINte	95.5118	9.49467		ADRNLPVESSEC	98.132	6.63227
ATPH2e	100		H2Otly	100	1.94628e-11		AGPSx	99.8249	1.19593		CPCTDTX	95.5118	9.49467		ADRNt	98.132	6.63227
ATPS4m	100		DNDPt44m	100	1.88355e-11		AHANDROSTANGLCte	99.8249	1.19593		CPPPGO	95.5118	9.49467		ADSELK	98.132	6.63227
ATPtm	100		H2O2tn	100	1.86276e-11		AHANDROSTANGLCtr	99.8249	1.19593		CREATtmdiffir	95.5118	9.49467		ADSK	98.132	6.63227
ATPtn	100		O2Stn	100	1.86276e-11		AHCYStn	99.8249	1.19593		CRNt	95.5118	9.49467		AFLATOXINte	98.132	6.63227
ATPtx	100		O2tn	100	1.86276e-11		AHCYStr	99.8249	1.19593		CRNtHa	95.5118	9.49467		AG13T10g	98.132	6.63227
AVITE1t	100		SPODMn	100	1.86276e-11		AHEXASE2ly	99.8249	1.19593		CRNtuIR	95.5118	9.49467		AG13T11g	98.132	6.63227
AVITE2t	100		EX_thmtp(e)	100	1.81175e-11		AHEXASEly	99.8249	1.19593		CRNtuNa	95.5118	9.49467		AG13T12g	98.132	6.63227
B_MANNASEly	100		THMTPt	100	1.81175e-11		AK2LGCHOLt	99.8249	1.19593		CRTSLt	95.5118	9.49467		AG13T13g	98.132	6.63227
B3GALT3g	100		3DSPHR	100	1.77968e-11		AKGDm	99.8249	1.19593		CRTSLtm	95.5118	9.49467		AG13T14g	98.132	6.63227
B3GALT41g	100		PMI1346PH	100	1.78392e-11		AKGMALtm	99.8249	1.19593		CRTSLtr	95.5118	9.49467		AG13T15g	98.132	6.63227
B3GALT42g	100		PMI1346PHn	100	1.78392e-11		AKGt4_3	99.8249	1.19593		CRTSTRNt	95.5118	9.49467		AG13T16g	98.132	6.63227
B3GALT43g	100		PPMI1346Ptn	100	1.78392e-11		AKGtp	99.8249	1.19593		CRTSTRNtm	95.5118	9.49467		AG13T17g	98.132	6.63227
B3GALT44g	100		SERPT	100	1.77968e-11		AKR1C41	99.8249	1.19593		CRTSTRNtr	95.5118	9.49467		AG13T18g	98.132	6.63227
B3GNT11g	100		EX_ksi(e)	100	1.76184e-11		AKR1C42	99.8249	1.19593		CRVNCtr	95.5118	9.49467		AG13T1g	98.132	6.63227
B3GNT12g	100		CLFORtex	100	1.7504e-11		ALAASNNaEx	99.8249	1.19593		CSNAT	95.5118	9.49467		AG13T2g	98.132	6.63227
B3GNT51g	100		RETH2	100	1.68385e-11		ALACYSNaEx	99.8249	1.19593		CSNATer	95.5118	9.49467		AG13T3g	98.132	6.63227
BALAtmr	100		DSAT	100	1.66837e-11		ALADGLNexR	99.8249	1.19593		CSNt	95.5118	9.49467		AG13T4g	98.132	6.63227
BALAVECSEC	100		34DHPLACOX(NADP)	100	1.63333e-11		ALADGLYexR	99.8249	1.19593		CSPG_At	95.5118	9.49467		AG13T5g	98.132	6.63227
BAMPPALDOX	100		M14NTg	100	1.60529e-11		ALAGLNexR	99.8249	1.19593		CSPG_Atly	95.5118	9.49467		AG13T6g	98.132	6.63227
BAMPPALDOXm	100		N2M2NMASNt	100	1.60529e-11		ALAGLNNaEx	99.8249	1.19593		CSPG_Bt	95.5118	9.49467		AG13T7g	98.132	6.63227
BBHOX	100		RTOTAL3t	100	1.58545e-11		ALAGLYexR	99.8249	1.19593		CSPG_Btly	95.5118	9.49467		AG13T8g	98.132	6.63227
BDHm	100		CHOLPtl	100	1.56449e-11		ALASERNaEx	99.8249	1.19593		CSPG_Ct	95.5118	9.49467		AG13T9g	98.132	6.63227
BDMT_L	100		GTHDH	100	1.56848e-11		ALASm	99.8249	1.19593		CSPG_Ctly	95.5118	9.49467		AGLPC	98.132	6.63227
BDMT_U	100		SMPD3l	100	1.56449e-11		ALAt2r	99.8249	1.19593		CSPG_Dt	95.5118	9.49467		AGLPED	98.132	6.63227
BETALDHx	100		SPHMYLNtl	100	1.56449e-11		ALAt2rL	99.8249	1.19593		CSPG_Dtly	95.5118	9.49467		AGLPET	98.132	6.63227
BETALDHxm	100		THYMDtm	100	1.55133e-11		ALAt4	99.8249	1.19593		CSPG_Et	95.5118	9.49467		AGLPH	98.132	6.63227
BHBt	100		COAtp	100	1.544e-11		ALATHRNaEx	99.8249	1.19593		CSPG_Etly	95.5118	9.49467		AGLPR	98.132	6.63227
BHBtm	100		ADNt	100	1.4878e-11		ALAtN1	99.8249	1.19593		CYANt	95.5118	9.49467		AGLPT	98.132	6.63227
BILDGLCURt	100		G6PDH2r	100	1.48768e-11		ALCD1	99.8249	1.19593		CYOOm3	95.5118	9.49467		AGMTm	98.132	6.63227
BILDGLCURte	100		GLNtm	100	1.47466e-11		ALCD21_D	99.8249	1.19593		CYSALANaEx	95.5118	9.49467		AGPAT1	98.132	6.63227
BILDGLCURtr	100		GLUNm	100	1.47466e-11		ALCD21_L	99.8249	1.19593		CYSASNNaEx	95.5118	9.49467		AGPex	98.132	6.63227
BILGLCURt	100		GND	100	1.48768e-11		ALCD22_D	99.8249	1.19593		CYSGLNNaEx	95.5118	9.49467		AGPRim	98.132	6.63227
BILGLCURte	100		PGL	100	1.48768e-11		ALCD22_L	99.8249	1.19593		CYSGLUexR	95.5118	9.49467		AGPSx	98.132	6.63227
BILGLCURtr	100		FTHFL	100	1.42476e-11		ALCD2yf	99.8249	1.19593		CYSGLYex	95.5118	9.49467		AHANDROSTANGLCte	98.132	6.63227
BILIRED	100		PUNP1	100	1.43403e-11		ALDD20x	99.8249	1.19593		CYSGLYexR	95.5118	9.49467		AHANDROSTANGLCtr	98.132	6.63227
BILIRUBt2	100		RTOT3	100	1.40659e-11		ALDD20xm	99.8249	1.19593		CYSSERNaEx	95.5118	9.49467		AHCYStn	98.132	6.63227
BILIRUBtr	100		EX_crvnc(e)	100	1.42501e-11		ALDD21	99.8249	1.19593		CYSt4	95.5118	9.49467		AHEXASE2ly	98.132	6.63227
BIOCYTtn	100		EX_no(e)	100	1.38743e-11		ALDD2x	99.8249	1.19593		CYSTAm	95.5118	9.49467		AHEXASEly	98.132	6.63227
BMTer_L	100		EX_s2l2n2m2masn(e)	100	1.41554e-11		ALDD2xm	99.8249	1.19593		CYStec	95.5118	9.49467		AK2LGCHOLt	98.132	6.63227
BMTer_U	100		FUCASEe	100	1.41554e-11		ALDD2y	99.8249	1.19593		CYSTGLUex	95.5118	9.49467		AKGDm	98.132	6.63227
BPNT	100		MI134PP	100	1.37836e-11		ALDSTRNte	99.8249	1.19593		CYSTHRNaEx	95.5118	9.49467		AKGMALtm	98.132	6.63227
BPNT2	100		MI34PP	100	1.37836e-11		ALKP	99.8249	1.19593		CYSTSERex	95.5118	9.49467		AKGt4_3	98.132	6.63227
BTND1	100		MI3PP	100	1.37836e-11		ALOX12	99.8249	1.19593		CYTDK1	95.5118	9.49467		AKGtp	98.132	6.63227
BTND1n	100		PIK5	100	1.26307e-11		ALOX12R	99.8249	1.19593		CYTDK2m	95.5118	9.49467		AKR1C41	98.132	6.63227
BTNDe	100		PUNP6	100	1.28932e-11		ALOX15	99.8249	1.19593		CYTDt4	95.5118	9.49467		AKR1C42	98.132	6.63227
BTNDm	100		EX_ha_pre1(e)	100	1.2683e-11		ALOX5	99.8249	1.19593		CYTDt5	95.5118	9.49467		ALAASNNaEx	98.132	6.63227
BTNPL	100		PEt	100	1.23707e-11		ALOX52	99.8249	1.19593		CYTDtl	95.5118	9.49467		ALACYSNaEx	98.132	6.63227
BTNPLm	100		EX_ps_hs(e)	100	1.24202e-11		ALR	99.8249	1.19593		CYTDtm	95.5118	9.49467		ALADGLNexR	98.132	6.63227
BTNt2	100		EX_xolest_hs(e)	100	1.22028e-11		ALR2	99.8249	1.19593		CYTK1m	95.5118	9.49467		ALADGLYexR	98.132	6.63227
BTNt2m	100		FBP	100	1.24744e-11		ALR3	99.8249	1.19593		D-LACtm	95.5118	9.49467		ALAGLNexR	98.132	6.63227
BTNt3i	100		XOLESTte	100	1.22028e-11		AM6SAD	99.8249	1.19593		DADA	95.5118	9.49467		ALAGLNNaEx	98.132	6.63227
BTNt4i	100		BETALDHxm	100	1.18151e-11		AMACR2p	99.8249	1.19593		DADNt4	95.5118	9.49467		ALAGLYexR	98.132	6.63227
BTNtn	100		CHOLD2m	100	1.18151e-11		AMACR2r	99.8249	1.19593		DAG_HSter	95.5118	9.49467		ALAR	98.132	6.63227
BUTt2m	100		DHCR241r	100	1.15876e-11		AMACRp	99.8249	1.19593		DAGKn_hs	95.5118	9.49467		ALASERNaEx	98.132	6.63227
BUTt2r	100		DHCR242r	100	1.15876e-11		AMACRr	99.8249	1.19593		DALAOXx	95.5118	9.49467		ALASm	98.132	6.63227
BVITEt	100		EBP2r	100	1.15876e-11		AMANK	99.8249	1.19593		DALAt2rL	95.5118	9.49467		ALAt2r	98.132	6.63227
BZt	100		EX_glyb(e)	100	1.18151e-11		AMCOXO	99.8249	1.19593		DALAxt	95.5118	9.49467		ALAt2rL	98.132	6.63227
BZtr	100		GLYBt4(2)r	100	1.18151e-11		AMETr	99.8249	1.19593		DASCBH	95.5118	9.49467		ALAt4	98.132	6.63227
C14STRr	100		GLYBtm	100	1.18151e-11		AMETt2m	99.8249	1.19593		DASCBR	95.5118	9.49467		ALATA_L	98.132	6.63227
C160CPT1	100		ADNK1m	100	1.12964e-11		AMETtn	99.8249	1.19593		DASPO1p	95.5118	9.49467		ALATHRNaEx	98.132	6.63227
C160CPT2	100		ADNtm	100	1.12964e-11		AMPDA	99.8249	1.19593		DCSPTN1t	95.5118	9.49467		ALAtN1	98.132	6.63227
C160CRNt	100		C4STMO2r	100	1.15273e-11		AMPTASECG	99.8249	1.19593		DEBRISOQUINEt	95.5118	9.49467		ALCD1	98.132	6.63227
C161CPT1	100		EX_duri(e)	100	1.15886e-11		AMPTASECGe	99.8249	1.19593		DESAT18_10	95.5118	9.49467		ALCD21_D	98.132	6.63227
C161CPT12	100		FUM	100	1.12375e-11		AMPtp	99.8249	1.19593		DESAT18_4	95.5118	9.49467		ALCD21_L	98.132	6.63227
C161CPT2	100		ACCOAgt	100	1.11727e-11		AMPtr	99.8249	1.19593		DESAT18_5	95.5118	9.49467		ALCD22_D	98.132	6.63227
C161CPT22	100		BILGLCURt	100	1.08728e-11		AMY1e	99.8249	1.19593		DESAT18_7	95.5118	9.49467		ALCD22_L	98.132	6.63227
C161CRN2t	100		BTNt2	100	1.09421e-11		AMY2e	99.8249	1.19593		DESAT18_8	95.5118	9.49467		ALCD2yf	98.132	6.63227
C161CRNt	100		COAtg	100	1.11727e-11		ANDRSTRNGLCte	99.8249	1.19593		DESAT18_9	95.5118	9.49467		ALDD20x	98.132	6.63227
C180CPT1	100		EX_estrones(e)	100	1.09924e-11		ANDRSTRNGLCtr	99.8249	1.19593		DESAT20_1	95.5118	9.49467		ALDD20xm	98.132	6.63227
C180CPT2	100		MI13456Ptn	100	1.11726e-11		ANDRSTRNte	99.8249	1.19593		DESAT20_2	95.5118	9.49467		ALDD21	98.132	6.63227
C180CRNt	100		MI1PS	100	1.11797e-11		ANDRSTRNtr	99.8249	1.19593		DESAT22_1p	95.5118	9.49467		ALDD2x	98.132	6.63227
C181CPT1	100		SIAT9g	100	1.11727e-11		AP4AH1	99.8249	1.19593		DESAT24_1	95.5118	9.49467		ALDD2xm	98.132	6.63227
C181CPT2	100		ST8SIA12	100	1.11727e-11		APAT2rm	99.8249	1.19593		DGCHOLte	95.5118	9.49467		ALDD2y	98.132	6.63227
C181CRNt	100		ARGLYSex	100	1.0692e-11		APRTO2	99.8249	1.19593		DGK2m	95.5118	9.49467		ALDSTRNte	98.132	6.63227
C204CPT1	100		DM_dctp(n)	100	1.06273e-11		AQCOBALt	99.8249	1.19593		DGNSKm	95.5118	9.49467		ALKP	98.132	6.63227
C204CPT2	100		DM_dttp(m)	100	1.06282e-11		ARAB-Lt	99.8249	1.19593		DGSNtm	95.5118	9.49467		ALOX12	98.132	6.63227
C204CRNt	100		EX_dgsn(e)	100	1.0812e-11		ARABR	99.8249	1.19593		DHAPA	95.5118	9.49467		ALOX12R	98.132	6.63227
C226COAtx	100		EX_gsn(e)	100	1.06846e-11		ARACHCOAtx	99.8249	1.19593		DHAPAx	95.5118	9.49467		ALOX15	98.132	6.63227
C226CPT1	100		EX_so4(e)	100	1.05637e-11		ARACHCPT1	99.8249	1.19593		DHCHOLESTANATEtm	95.5118	9.49467		ALOX5	98.132	6.63227
C226CPT2	100		EX_xoltri27(e)	100	1.08775e-11		ARACHCPT2	99.8249	1.19593		DHCR241r	95.5118	9.49467		ALOX52	98.132	6.63227
C226CRNt	100		ACGAM6PSi	100	9.9726e-12		ARACHCRNt	99.8249	1.19593		DHCR242r	95.5118	9.49467		ALR	98.132	6.63227
C2M26DCOAHLm	100		DURIt	100	1.03041e-11		ARACHDCOAtx	99.8249	1.19593		DHCR243r	95.5118	9.49467		ALR2	98.132	6.63227
C2M26DCOAHLx	100		GUAt	100	1.03017e-11		ARACHDt2	99.8249	1.19593		DHCR71r	95.5118	9.49467		ALR3	98.132	6.63227
C3STDH1Pr	100		M7MASNBterg	100	1.03046e-11		ARACHDtr	99.8249	1.19593		DHCR72r	95.5118	9.49467		AM6SAD	98.132	6.63227
C3STDH1r	100		MANter	100	1.03046e-11		ARACHt	99.8249	1.19593		DHDPBMTm	95.5118	9.49467		AMACR2p	98.132	6.63227
C3STKR2r	100		MM8Ber	100	1.03046e-11		ARGDCm	99.8249	1.19593		DHEASt	95.5118	9.49467		AMACR2r	98.132	6.63227
C4STMO1r	100		DM_dgtp(n)	100	9.83657e-12		ARGLYSex	99.8249	1.19593		DHEAStr	95.5118	9.49467		AMACRp	98.132	6.63227
C4STMO2Pr	100		DNDPt13m	100	9.69947e-12		ARGt4	99.8249	1.19593		DHEAtr	95.5118	9.49467		AMACRr	98.132	6.63227
C4STMO2r	100		DNDPt1m	100	9.90971e-12		ARGtiDF	99.8249	1.19593		DHPM1	95.5118	9.49467		AMANK	98.132	6.63227
CAATPS	100		DNDPt43m	100	9.70101e-12		ARSA	99.8249	1.19593		DIGALSGALSIDEte	95.5118	9.49467		AMCOXO	98.132	6.63227
CAMPt	100		EX_ins(e)	100	9.97426e-12		ARTCOAL1	99.8249	1.19593		DIGALSIDEtl	95.5118	9.49467		AMETt2m	98.132	6.63227
CAT2p	100		EX_lpchol_hs(e)	100	9.97257e-12		ARTCOAL2	99.8249	1.19593		DLNLCGCPT1	95.5118	9.49467		AMETtn	98.132	6.63227
CAt7r	100		HAS2	100	9.7681e-12		ARTCOAL3	99.8249	1.19593		DLNLCGCPT2	95.5118	9.49467		AMPDA	98.132	6.63227
CATm	100		KAS8	100	9.76752e-12		ARTFR11	99.8249	1.19593		DLNLCGCRNt	95.5118	9.49467		AMPTASECG	98.132	6.63227
CATp	100		MM6bg	100	9.97138e-12		ARTFR12	99.8249	1.19593		DLNLCGt	95.5118	9.49467		AMPTASECGe	98.132	6.63227
CBL2OR	100		MTHFC	100	1.00428e-11		ARTFR13	99.8249	1.19593		DM_13-cis-oretn(n)	95.5118	9.49467		AMPtp	98.132	6.63227
CBL2tm	100		N3Tg	100	9.90148e-12		ARTFR202	99.8249	1.19593		DM_13-cis-retn(n)	95.5118	9.49467		AMPtr	98.132	6.63227
CBLATm	100		NOS1	100	9.97347e-12		ARTFR203	99.8249	1.19593		DM_avite1(c)	95.5118	9.49467		AMY1e	98.132	6.63227
CBPPer	100		NOS2	100	9.97347e-12		ARTFR204	99.8249	1.19593		DM_avite2(c)	95.5118	9.49467		AMY2e	98.132	6.63227
CBPSam	100		NOt	100	9.97347e-12		ARTFR205	99.8249	1.19593		DM_bvite(c)	95.5118	9.49467		ANDRSTRNGLCte	98.132	6.63227
CBPter	100		P45027A1m	100	1.01129e-11		ARTFR206	99.8249	1.19593		DM_gpi_sig(er)	95.5118	9.49467		ANDRSTRNGLCtr	98.132	6.63227
CBR1	100		P4507B12r	100	1.01129e-11		ARTFR207	99.8249	1.19593		DM_kdn(c)	95.5118	9.49467		ANDRSTRNte	98.132	6.63227
CBR2	100		XOL27OHtm	100	1.01129e-11		ARTFR208	99.8249	1.19593		DM_m(em)3gacpail_prot_hs(r)	95.5118	9.49467		ANDRSTRNtr	98.132	6.63227
CCA_D3t	100		XOLTRI27tc	100	1.01129e-11		ARTFR209	99.8249	1.19593		DM_mem2emgacpail_prot_hs(r)	95.5118	9.49467		AP4AH1	98.132	6.63227
CDIPTr	100		XOLTRI27te	100	1.01129e-11		ARTFR210	99.8249	1.19593		DM_oretn(n)	95.5118	9.49467		APAT2rm	98.132	6.63227
CDPDAGtm	100		XYLUR	100	1.01041e-11		ARTFR211	99.8249	1.19593		DM_Ser-Gly/Ala-X-Gly(ly)	95.5118	9.49467		APRTO2	98.132	6.63227
CDS	100		24,25DHVITD3t	100	9.34755e-12		ARTFR212	99.8249	1.19593		DM_sprm(c)	95.5118	9.49467		AQCOBALt	98.132	6.63227
CDSm	100		24,25DHVITD3tm	100	9.34755e-12		ARTFR213	99.8249	1.19593		DM_yvite(c)	95.5118	9.49467		ARAB-Lt	98.132	6.63227
CEPTC	100		24,25VITD3Hm	100	9.34755e-12		ARTFR31	99.8249	1.19593		DMATT	95.5118	9.49467		ARABR	98.132	6.63227
CEPTE	100		ACONTm	100	9.48143e-12		ARTFR32	99.8249	1.19593		DMHPTCRNCPT1	95.5118	9.49467		ARACHCOAtx	98.132	6.63227
CERK	100		CLFORtex2	100	9.41899e-12		ARTFR33	99.8249	1.19593		DMNONCRNt	95.5118	9.49467		ARACHCPT1	98.132	6.63227
CERT1gt	100		CMPSAS	100	9.34969e-12		ARTFR34	99.8249	1.19593		DNADDP	95.5118	9.49467		ARACHCPT2	98.132	6.63227
CERT1rt	100		DM_dttp(n)	100	9.34266e-12		ARTFR41	99.8249	1.19593		DNADtn	95.5118	9.49467		ARACHCRNt	98.132	6.63227
CERT2gt	100		DNDPt12m	100	9.56296e-12		ARTFR42	99.8249	1.19593		DNAMTn	95.5118	9.49467		ARACHDCOAtx	98.132	6.63227
CERT2rt	100		DNDPt18m	100	9.34683e-12		ARTFR43	99.8249	1.19593		DNAMTSEn	95.5118	9.49467		ARACHDt2	98.132	6.63227
CGLYt3(2)	100		DNDPt19m	100	9.56339e-12		ARTFR44	99.8249	1.19593		DNDPt12m	95.5118	9.49467		ARACHDtr	98.132	6.63227
CGMPt	100		DNDPt20m	100	9.27453e-12		ARTFR45	99.8249	1.19593		DNDPt13m	95.5118	9.49467		ARACHt	98.132	6.63227
CHLP	100		DNDPt42m	100	9.41773e-12		ARTFR46	99.8249	1.19593		DNDPt16m	95.5118	9.49467		ARGDCm	98.132	6.63227
CHLPCTD	100		DNDPt45m	100	9.41762e-12		ARTFR61	99.8249	1.19593		DNDPt18m	95.5118	9.49467		ARGLYSex	98.132	6.63227
CHLtm	100		EX_2425dhvitd3(e)	100	9.34755e-12		ARTPLM1	99.8249	1.19593		DNDPt19m	95.5118	9.49467		ARGt4	98.132	6.63227
CHOLATEt	100		EX_srtn(e)	100	9.41789e-12		ARTPLM1m	99.8249	1.19593		DNDPt1m	95.5118	9.49467		ARGtiDF	98.132	6.63227
CHOLATEt2	100		MM5cg	100	9.41863e-12		ARTPLM2	99.8249	1.19593		DNDPt20m	95.5118	9.49467		ARSA	98.132	6.63227
CHOLD2m	100		MM6ag	100	9.48887e-12		ARTPLM2m	99.8249	1.19593		DNDPt21m	95.5118	9.49467		ARTCOAL1	98.132	6.63227
CHOLK	100		MM6B1ag	100	9.49019e-12		ARTPLM3	99.8249	1.19593		DNDPt24m	95.5118	9.49467		ARTCOAL2	98.132	6.63227
CHOLPtg	100		MM6B1bg	100	9.34685e-12		ARTPLM3m	99.8249	1.19593		DNDPt25m	95.5118	9.49467		ARTCOAL3	98.132	6.63227
CHOLPtl	100		MM6B2g	100	9.41863e-12		ASAH1	99.8249	1.19593		DNDPt27m	95.5118	9.49467		ARTFR11	98.132	6.63227
CHOLt4	100		MM7Ag	100	9.48887e-12		ASCBOX	99.8249	1.19593		DNDPt2m	95.5118	9.49467		ARTFR12	98.132	6.63227
CHOLtg	100		MM7B1g	100	9.49019e-12		ASCBt	99.8249	1.19593		DNDPt30m	95.5118	9.49467		ARTFR13	98.132	6.63227
CHOLtn	100		MM7B2g	100	9.34685e-12		ASCBt4	99.8249	1.19593		DNDPt31m	95.5118	9.49467		ARTFR202	98.132	6.63227
CHOLtr	100		MM7Cag	100	9.34685e-12		Asn-X-Ser/Thrtr	99.8249	1.19593		DNDPt32m	95.5118	9.49467		ARTFR203	98.132	6.63227
CHOLtu	100		5HLTDL	100	9.19985e-12		ASNALANaEx	99.8249	1.19593		DNDPt33m	95.5118	9.49467		ARTFR204	98.132	6.63227
CHSTEROLSULT	100		ARACHDCOAtx	100	9.19795e-12		ASNCYSNaEx	99.8249	1.19593		DNDPt34m	95.5118	9.49467		ARTFR205	98.132	6.63227
CHSTEROLt	100		ARGtiDF	100	9.1268e-12		ASNGLNNaEx	99.8249	1.19593		DNDPt36m	95.5118	9.49467		ARTFR206	98.132	6.63227
CHSTEROLt1	100		C4STMO2Pr	100	9.1278e-12		ASNNm	99.8249	1.19593		DNDPt39m	95.5118	9.49467		ARTFR207	98.132	6.63227
CHSTEROLt2	100		DNDPt21m	100	9.05197e-12		ASNSERNaEx	99.8249	1.19593		DNDPt42m	95.5118	9.49467		ARTFR208	98.132	6.63227
CHSTEROLt3	100		EX_chol(e)	100	9.1264e-12		ASNt4	99.8249	1.19593		DNDPt43m	95.5118	9.49467		ARTFR209	98.132	6.63227
CHSTEROLtg	100		EX_trp-L(e)	100	9.27573e-12		ASNTHRNaEx	99.8249	1.19593		DNDPt44m	95.5118	9.49467		ARTFR210	98.132	6.63227
CHTNASE	100		EX_vacc(e)	100	9.13174e-12		ASNtm	99.8249	1.19593		DNDPt45m	95.5118	9.49467		ARTFR211	98.132	6.63227
CHTNASEe	100		FAOXC2242046x	100	9.19795e-12		ASNtN1	99.8249	1.19593		DNDPt48m	95.5118	9.49467		ARTFR212	98.132	6.63227
CITL	100		HDCEAtr	100	8.74885e-12		ASPDt6	99.8249	1.19593		DNDPt53m	95.5118	9.49467		ARTFR213	98.132	6.63227
CITRtm	100		MM5bg	100	9.27145e-12		ASPDxt	99.8249	1.19593		DNDPt55m	95.5118	9.49467		ARTFR31	98.132	6.63227
CITt4_2	100		NADPtru	100	9.33883e-12		ASPGLUm	99.8249	1.19593		DNDPt56m	95.5118	9.49467		ARTFR32	98.132	6.63227
CITt4_4	100		VACCt	100	9.13174e-12		ASPt6	99.8249	1.19593		DNDPt57m	95.5118	9.49467		ARTFR33	98.132	6.63227
CITtam	100		ADNCYC	100	8.43078e-12		ASPTA	99.8249	1.19593		DNDPt58m	95.5118	9.49467		ARTFR34	98.132	6.63227
CITtbm	100		ARGt4	100	8.67135e-12		ASPTAm	99.8249	1.19593		DNDPt6m	95.5118	9.49467		ARTFR41	98.132	6.63227
CK	100		CSm	100	8.51276e-12		ATP1ter	99.8249	1.19593		DOGULND1	95.5118	9.49467		ARTFR42	98.132	6.63227
CKc	100		GK1m	100	8.43122e-12		ATP2ter	99.8249	1.19593		DOGULND2	95.5118	9.49467		ARTFR43	98.132	6.63227
CLFORtex	100		GSNKm	100	8.43122e-12		ATPasel	99.8249	1.19593		DOGULNO1	95.5118	9.49467		ARTFR44	98.132	6.63227
CLFORtex2	100		GSNtm	100	8.43122e-12		ATPH1e	99.8249	1.19593		DOGULNO2	95.5118	9.49467		ARTFR45	98.132	6.63227
CLHCO3tex2	100		HAS1	100	8.58496e-12		ATPH2e	99.8249	1.19593		DOLASNT_Uer	95.5118	9.49467		ARTFR46	98.132	6.63227
CLHCOtex	100		SULFOX	100	8.83055e-12		ATPS4m	99.8249	1.19593		DOLDPP_Uer	95.5118	9.49467		ARTFR61	98.132	6.63227
CLI2tex	100		UDPGALtg	100	8.58925e-12		ATPtm	99.8249	1.19593		DOLGPP_Ler	95.5118	9.49467		ARTPLM1	98.132	6.63227
CLOHtex2	100		DHAAt1r	100	8.35034e-12		ATPtn	99.8249	1.19593		DOLGPP_Uer	95.5118	9.49467		ARTPLM1m	98.132	6.63227
CLOXAtex2	100		EX_dhdascb(e)	100	8.35034e-12		ATPtx	99.8249	1.19593		DOLK_L	95.5118	9.49467		ARTPLM2	98.132	6.63227
CLPNDCOAtx	100		EX_din(e)	100	8.01585e-12		AVITE1t	99.8249	1.19593		DOLK_U	95.5118	9.49467		ARTPLM2m	98.132	6.63227
CLPNDCPT1	100		EX_nrpphr(e)	100	8.02016e-12		AVITE2t	99.8249	1.19593		DOLMANP_Uter	95.5118	9.49467		ARTPLM3	98.132	6.63227
CLPNDCPT2	100		MM5ag	100	8.34907e-12		B_MANNASEly	99.8249	1.19593		DOLP_Uter	95.5118	9.49467		ARTPLM3m	98.132	6.63227
CLPNDCRNt	100		MTHFDm	100	8.18019e-12		B3GALT3g	99.8249	1.19593		DOLPGT1_Uer	95.5118	9.49467		ASCBOX	98.132	6.63227
CLPNDt	100		DM_ethamp(r)	100	7.9352e-12		B3GALT41g	99.8249	1.19593		DOLPGT2_Uer	95.5118	9.49467		ASCBt	98.132	6.63227
CLS_hs	100		ELAIDt	100	7.75578e-12		B3GALT42g	99.8249	1.19593		DOLPGT3_Uer	95.5118	9.49467		ASCBt4	98.132	6.63227
CMPACNAtg	100		EX_h2o2(e)	100	7.58515e-12		B3GALT43g	99.8249	1.19593		DOLPH_Ler	95.5118	9.49467		Asn-X-Ser/Thrtr	98.132	6.63227
CMPACNAtn	100		EX_retn(e)	100	7.85828e-12		B3GALT44g	99.8249	1.19593		DOLPH_Uer	95.5118	9.49467		ASNALANaEx	98.132	6.63227
CMPSAS	100		HDCAter	100	7.9352e-12		B3GNT11g	99.8249	1.19593		DOLPMT_U	95.5118	9.49467		ASNCYSNaEx	98.132	6.63227
CMPSASn	100		RETNt	100	7.85828e-12		B3GNT12g	99.8249	1.19593		DOLPMT1_Uer	95.5118	9.49467		ASNGLNNaEx	98.132	6.63227
CO2t	100		SGPL12r	100	7.9352e-12		B3GNT51g	99.8249	1.19593		DOLPMT2_Uer	95.5118	9.49467		ASNNm	98.132	6.63227
CO2ter	100		ARACHCPT1	100	7.11796e-12		BALAtmr	99.8249	1.19593		DOLPMT3_Uer	95.5118	9.49467		ASNSERNaEx	98.132	6.63227
CO2tg	100		ARACHCPT2	100	7.11796e-12		BALAVECSEC	99.8249	1.19593		DOLPMT4_Uer	95.5118	9.49467		ASNt4	98.132	6.63227
CO2tm	100		ARACHCRNt	100	7.11796e-12		BAMPPALDOX	99.8249	1.19593		DOPAt4(2)r	95.5118	9.49467		ASNTHRNaEx	98.132	6.63227
CO2tn	100		CEPTE	100	7.31224e-12		BAMPPALDOXm	99.8249	1.19593		DOPAtu	95.5118	9.49467		ASNtm	98.132	6.63227
CO2tp	100		DGSNt	100	7.02686e-12		BBHOX	99.8249	1.19593		DOPAVESSEC	95.5118	9.49467		ASNtN1	98.132	6.63227
COAtg	100		EX_retinol(e)	100	7.02459e-12		BDHm	99.8249	1.19593		DPCOAK	95.5118	9.49467		ASPDt6	98.132	6.63227
COAtl	100		FAOXC200180m	100	7.11796e-12		BDMT_L	99.8249	1.19593		DPCOAtl	95.5118	9.49467		ASPDxt	98.132	6.63227
COAtm	100		HIStN1	100	7.30623e-12		BDMT_U	99.8249	1.19593		DPHMBDCm	95.5118	9.49467		ASPGLUm	98.132	6.63227
COAtn	100		INSt	100	7.30727e-12		BETALDHx	99.8249	1.19593		DRIBt	95.5118	9.49467		ASPt6	98.132	6.63227
COAtp	100		PETHCT	100	7.31224e-12		BETALDHxm	99.8249	1.19593		DRPA	95.5118	9.49467		ASPTA	98.132	6.63227
COAtr	100		ARTFR45	100	6.92711e-12		BHBt	99.8249	1.19593		DURAD	95.5118	9.49467		ASPTAm	98.132	6.63227
COKECBESr	100		DGAT	100	6.41763e-12		BHBtm	99.8249	1.19593		DURAD2	95.5118	9.49467		ATP1ter	98.132	6.63227
COQ3m	100		EX_nrvnc(e)	100	6.92711e-12		BILDGLCURt	99.8249	1.19593		DURIK1	95.5118	9.49467		ATP2ter	98.132	6.63227
COQ5m	100		FACOAL241	100	6.92711e-12		BILDGLCURte	99.8249	1.19593		DURItn	95.5118	9.49467		ATPasel	98.132	6.63227
COQ6m	100		FAOXC241181x	100	6.92711e-12		BILDGLCURtr	99.8249	1.19593		DUTPDPm	95.5118	9.49467		ATPH1e	98.132	6.63227
COQ7m	100		NRVNCCOAtx	100	6.92711e-12		BILGLCURt	99.8249	1.19593		EAFLATOXINte	95.5118	9.49467		ATPH2e	98.132	6.63227
CORE2GTg	100		ODECOAtx	100	6.92711e-12		BILGLCURte	99.8249	1.19593		EBASTINEOHte	95.5118	9.49467		ATPS4m	98.132	6.63227
CORE6GTg	100		13DAMPPOX	100	5.61557e-12		BILGLCURtr	99.8249	1.19593		EBASTINEte	95.5118	9.49467		ATPtm	98.132	6.63227
COt	100		1a,24,25VITD2Hm	100	5.61557e-12		BILIRED	99.8249	1.19593		EBP2r	95.5118	9.49467		ATPtn	98.132	6.63227
COUCOAFm	100		1a,24,25VITD3Hm	100	5.61557e-12		BILIRUBt2	99.8249	1.19593		ECOAH1m	95.5118	9.49467		ATPtx	98.132	6.63227
COUMARINte	100		1a,25VITD2Hm	100	5.61557e-12		BILIRUBtr	99.8249	1.19593		ECOAH1x	95.5118	9.49467		AVITE1t	98.132	6.63227
CPCTDTX	100		1a,25VITD3Hm	100	5.61557e-12		BIOCYTtn	99.8249	1.19593		ECOAH9m	95.5118	9.49467		AVITE2t	98.132	6.63227
CPPPGO	100		24,25DHVITD2t	100	5.61557e-12		BMTer_L	99.8249	1.19593		EGMESTr	95.5118	9.49467		B_MANNASEly	98.132	6.63227
CREATt4(2)r	100		24,25DHVITD2tm	100	5.61557e-12		BMTer_U	99.8249	1.19593		EHGLAT	95.5118	9.49467		B3GALT3g	98.132	6.63227
CREATtmdiffir	100		24,25VITD2Hm	100	5.61557e-12		BPNT	99.8249	1.19593		EHGLAT2m	95.5118	9.49467		B3GALT41g	98.132	6.63227
CRMPte	100		24NPHte	100	5.61557e-12		BPNT2	99.8249	1.19593		EHGLATm	95.5118	9.49467		B3GALT42g	98.132	6.63227
CRNCAR3tp	100		25HVITD2t	100	5.61557e-12		BTND1	99.8249	1.19593		EICOSTETCPT1	95.5118	9.49467		B3GALT43g	98.132	6.63227
CRNCARtp	100		25HVITD2tin	100	5.61557e-12		BTND1n	99.8249	1.19593		EICOSTETCPT2	95.5118	9.49467		B3GALT44g	98.132	6.63227
CRNt	100		25HVITD2tin-m	100	5.61557e-12		BTNDe	99.8249	1.19593		EICOSTETCRNt	95.5118	9.49467		B3GNT11g	98.132	6.63227
CRNtHa	100		25HVITD2tm	100	5.61557e-12		BTNDm	99.8249	1.19593		EICOSTETt	95.5118	9.49467		B3GNT12g	98.132	6.63227
CRNtim	100		25HVITD3t	100	5.61557e-12		BTNPL	99.8249	1.19593		ELAIDCPT1	95.5118	9.49467		B3GNT51g	98.132	6.63227
CRNtuIR	100		25HVITD3tin	100	5.61557e-12		BTNPLm	99.8249	1.19593		ELAIDCPT2	95.5118	9.49467		BALAtmr	98.132	6.63227
CRNtuNa	100		25HVITD3tin-m	100	5.61557e-12		BTNt2	99.8249	1.19593		ELAIDCRNt	95.5118	9.49467		BALAVECSEC	98.132	6.63227
CRNtx	100		25HVITD3tm	100	5.61557e-12		BTNt2m	99.8249	1.19593		ENGASE	95.5118	9.49467		BAMPPALDOX	98.132	6.63227
CRTSLt	100		25VITD2Hm	100	5.61557e-12		BTNt3i	99.8249	1.19593		ENGASE2	95.5118	9.49467		BAMPPALDOXm	98.132	6.63227
CRTSLtm	100		25VITD3Hm	100	5.61557e-12		BTNt4i	99.8249	1.19593		ENMAN1g	95.5118	9.49467		BBHOX	98.132	6.63227
CRTSLtr	100		2HCO3_NAt	100	5.61557e-12		BTNtn	99.8249	1.19593		ENMAN2g	95.5118	9.49467		BDHm	98.132	6.63227
CRTSTRNt	100		2OXOADOXm	100	5.61557e-12		BUTt2m	99.8249	1.19593		ENMAN3g	95.5118	9.49467		BDMT_L	98.132	6.63227
CRTSTRNtm	100		2OXOADPTm	100	5.61557e-12		BUTt2r	99.8249	1.19593		ENMAN4g	95.5118	9.49467		BDMT_U	98.132	6.63227
CRTSTRNtr	100		34DHPLACOX	100	5.61557e-12		BVITEt	99.8249	1.19593		ENMAN5g	95.5118	9.49467		BETALDHx	98.132	6.63227
CRVNCtr	100		34HPLFM	100	5.61557e-12		BZt	99.8249	1.19593		ENMAN6g	95.5118	9.49467		BETALDHxm	98.132	6.63227
CSm	100		3DPHBH1	100	5.61557e-12		BZtr	99.8249	1.19593		ESTRADIOLGLCt2	95.5118	9.49467		BHBt	98.132	6.63227
CSNAT	100		3DPHBH2	100	5.61557e-12		C14STRr	99.8249	1.19593		ESTRIOLGLCte	95.5118	9.49467		BHBtm	98.132	6.63227
CSNAT2m	100		3HAO	100	5.61557e-12		C160CPT1	99.8249	1.19593		ESTRIOLGLCtr	95.5118	9.49467		BILDGLCURt	98.132	6.63227
CSNAT2x	100		3HBCDm	100	5.61557e-12		C160CPT2	99.8249	1.19593		ESTSULT	95.5118	9.49467		BILDGLCURte	98.132	6.63227
CSNAT3x	100		3HCO3_NAt	100	5.61557e-12		C160CRNt	99.8249	1.19593		ETF	95.5118	9.49467		BILDGLCURtr	98.132	6.63227
CSNATer	100		3HLYTCL	100	5.61557e-12		C161CPT1	99.8249	1.19593		ETFQO	95.5118	9.49467		BILGLCURt	98.132	6.63227
CSNATm	100		3HPCOAHYD	100	5.61557e-12		C161CPT12	99.8249	1.19593		ETHP	95.5118	9.49467		BILGLCURte	98.132	6.63227
CSNATp	100		3HXKYNDCL	100	5.61557e-12		C161CPT2	99.8249	1.19593		ETOHMO	95.5118	9.49467		BILGLCURtr	98.132	6.63227
CSNATr	100		3HXKYNOXDA	100	5.61557e-12		C161CPT22	99.8249	1.19593		ETOHt	95.5118	9.49467		BILIRED	98.132	6.63227
CSNt	100		3MOBt2im	100	5.61557e-12		C161CRN2t	99.8249	1.19593		EX_10fthf(e)	95.5118	9.49467		BILIRUBt2	98.132	6.63227
CSPG_At	100		3MOPt2im	100	5.61557e-12		C161CRNt	99.8249	1.19593		EX_10fthf5glu(e)	95.5118	9.49467		BILIRUBtr	98.132	6.63227
CSPG_Atly	100		3MOX4HOXPGALDOX	100	5.61557e-12		C180CPT1	99.8249	1.19593		EX_10fthf6glu(e)	95.5118	9.49467		BIOCYTtn	98.132	6.63227
CSPG_Bt	100		3MOX4HOXPGALDOX(NADP)	100	5.61557e-12		C180CPT2	99.8249	1.19593		EX_10fthf7glu(e)	95.5118	9.49467		BMTer_L	98.132	6.63227
CSPG_Btly	100		3NTD7l	100	5.61557e-12		C180CRNt	99.8249	1.19593		EX_11-cis-retfa(e)	95.5118	9.49467		BMTer_U	98.132	6.63227
CSPG_Ct	100		3SALAASPm	100	5.61557e-12		C181CPT1	99.8249	1.19593		EX_2425dhvitd2(e)	95.5118	9.49467		BPNT	98.132	6.63227
CSPG_Ctly	100		3SALATAi	100	5.61557e-12		C181CPT2	99.8249	1.19593		EX_24nph(e)	95.5118	9.49467		BPNT2	98.132	6.63227
CSPG_Dt	100		3SALATAim	100	5.61557e-12		C181CRNt	99.8249	1.19593		EX_25hvitd2(e)	95.5118	9.49467		BTND1	98.132	6.63227
CSPG_Dtly	100		41R1H2MAE12BOOX	100	5.61557e-12		C204CPT1	99.8249	1.19593		EX_4hdebrisoquine(e)	95.5118	9.49467		BTND1n	98.132	6.63227
CSPG_Et	100		41R2A1H12BOOX	100	5.61557e-12		C204CPT2	99.8249	1.19593		EX_4mptnl(e)	95.5118	9.49467		BTNDe	98.132	6.63227
CSPG_Etly	100		4HBZCOAFm	100	5.61557e-12		C204CRNt	99.8249	1.19593		EX_4nph(e)	95.5118	9.49467		BTNDm	98.132	6.63227
CTPtn	100		4HBZFm	100	5.61557e-12		C226COAtx	99.8249	1.19593		EX_4nphsf(e)	95.5118	9.49467		BTNPL	98.132	6.63227
CYANSTm	100		4HDEBRISOQUINEte	100	5.61557e-12		C226CPT1	99.8249	1.19593		EX_5adtststerone(e)	95.5118	9.49467		BTNPLm	98.132	6.63227
CYANt	100		4HGLSDm	100	5.61557e-12		C226CPT2	99.8249	1.19593		EX_5adtststeroneglc(e)	95.5118	9.49467		BTNt2	98.132	6.63227
CYANtm	100		4MOPt2im	100	5.61557e-12		C226CRNt	99.8249	1.19593		EX_5dhf(e)	95.5118	9.49467		BTNt2m	98.132	6.63227
CYOOm2	100		4MPTNLte	100	5.61557e-12		C2M26DCOAHLm	99.8249	1.19593		EX_5fthf(e)	95.5118	9.49467		BTNt3i	98.132	6.63227
CYOOm3	100		4MPTNLtm	100	5.61557e-12		C2M26DCOAHLx	99.8249	1.19593		EX_5thf(e)	95.5118	9.49467		BTNt4i	98.132	6.63227
CYOR-u10m	100		4MPTNLtr	100	5.61557e-12		C3STDH1Pr	99.8249	1.19593		EX_6dhf(e)	95.5118	9.49467		BTNtn	98.132	6.63227
CYSALANaEx	100		4NPHSFte	100	5.61557e-12		C3STDH1r	99.8249	1.19593		EX_6htststerone(e)	95.5118	9.49467		BUTt2m	98.132	6.63227
CYSASNNaEx	100		4NPHSULT	100	5.61557e-12		C3STKR2r	99.8249	1.19593		EX_6thf(e)	95.5118	9.49467		BUTt2r	98.132	6.63227
CYSGLNNaEx	100		4NPHte	100	5.61557e-12		C4STMO1r	99.8249	1.19593		EX_7dhf(e)	95.5118	9.49467		BVITEt	98.132	6.63227
CYSGLUexR	100		5ADTSTSTERONEGLCte	100	5.61557e-12		C4STMO2Pr	99.8249	1.19593		EX_7thf(e)	95.5118	9.49467		BZt	98.132	6.63227
CYSGLYex	100		5ADTSTSTERONEGLCtr	100	5.61557e-12		C4STMO2r	99.8249	1.19593		EX_9-cis-retfa(e)	95.5118	9.49467		BZtr	98.132	6.63227
CYSGLYexR	100		5ADTSTSTERONEte	100	5.61557e-12		CAATPS	99.8249	1.19593		EX_abt(e)	95.5118	9.49467		C14STRr	98.132	6.63227
CYSSERNaEx	100		5ADTSTSTERONEtr	100	5.61557e-12		CAT2p	99.8249	1.19593		EX_acald(e)	95.5118	9.49467		C160CPT1	98.132	6.63227
CYSt4	100		5FTHFt2	100	5.61557e-12		CAt7r	99.8249	1.19593		EX_acgalfucgalacgalfuc12gal14acglcgalgluside_hs(e)	95.5118	9.49467		C160CPT2	98.132	6.63227
CYSTAm	100		5HOXINDACTO2OX	100	5.61557e-12		CATm	99.8249	1.19593		EX_acgalfucgalacgalfucgalacglcgal14acglcgalgluside_hs(e)	95.5118	9.49467		C160CRNt	98.132	6.63227
CYStec	100		5HOXINDACTOX	100	5.61557e-12		CATp	99.8249	1.19593		EX_acgam(e)	95.5118	9.49467		C161CPT1	98.132	6.63227
CYSTGLUex	100		5HOXINDACTOXm	100	5.61557e-12		CBL2OR	99.8249	1.19593		EX_ach(e)	95.5118	9.49467		C161CPT12	98.132	6.63227
CYSTHRNaEx	100		5HOXINOXDA	100	5.61557e-12		CBL2tm	99.8249	1.19593		EX_acn13acngalgbside_hs(e)	95.5118	9.49467		C161CPT2	98.132	6.63227
CYSTSERex	100		5HTRPDOX	100	5.61557e-12		CBLATm	99.8249	1.19593		EX_acn23acngalgbside_hs(e)	95.5118	9.49467		C161CPT22	98.132	6.63227
CYTD	100		5HXKYNDCL	100	5.61557e-12		CBPPer	99.8249	1.19593		EX_acnacngal14acglcgalgluside_hs(e)	95.5118	9.49467		C161CRN2t	98.132	6.63227
CYTDK1	100		5HXKYNOXDA	100	5.61557e-12		CBPter	99.8249	1.19593		EX_acnacngalgbside_hs(e)	95.5118	9.49467		C161CRNt	98.132	6.63227
CYTDK2m	100		6HTSTSTERONEte	100	5.61557e-12		CBR1	99.8249	1.19593		EX_acngalacglcgal14acglcgalgluside_hs(e)	95.5118	9.49467		C180CPT1	98.132	6.63227
CYTDn	100		7DHCHSTEROLtr	100	6.19991e-12		CBR2	99.8249	1.19593		EX_adp	95.5118	9.49467		C180CPT2	98.132	6.63227
CYTDt	100		A_MANASE	100	5.61557e-12		CCA_D3t	99.8249	1.19593		EX_adprbp(e)	95.5118	9.49467		C180CRNt	98.132	6.63227
CYTDt4	100		A4GALTc	100	5.61557e-12		CDIPTr	99.8249	1.19593		EX_adprib(e)	95.5118	9.49467		C181CPT1	98.132	6.63227
CYTDt5	100		ABO1g	100	5.61557e-12		CDPDAGtm	99.8249	1.19593		EX_aflatoxin(e)	95.5118	9.49467		C181CPT2	98.132	6.63227
CYTDtl	100		ABO2g	100	5.61557e-12		CDS	99.8249	1.19593		EX_ahandrostanglc(e)	95.5118	9.49467		C181CRNt	98.132	6.63227
CYTDtm	100		ABO3g	100	5.61557e-12		CDSm	99.8249	1.19593		EX_ak2lgchol_hs(e)	95.5118	9.49467		C204CPT1	98.132	6.63227
CYTDtn	100		ABO4g	100	5.61557e-12		CEPTC	99.8249	1.19593		EX_aldstrn(e)	95.5118	9.49467		C204CPT2	98.132	6.63227
CYTK1	100		ABO5g	100	5.61557e-12		CEPTE	99.8249	1.19593		EX_amp(e)	95.5118	9.49467		C204CRNt	98.132	6.63227
CYTK10	100		ABO6g	100	5.61557e-12		CERT1gt	99.8249	1.19593		EX_andrstrn(e)	95.5118	9.49467		C226COAtx	98.132	6.63227
CYTK10n	100		ABO7g	100	5.61557e-12		CERT1rt	99.8249	1.19593		EX_aqcobal(e)	95.5118	9.49467		C226CPT1	98.132	6.63227
CYTK11	100		ABO8g	100	5.61557e-12		CERT2gt	99.8249	1.19593		EX_arab-L(e)	95.5118	9.49467		C226CPT2	98.132	6.63227
CYTK11n	100		ABO9g	100	5.61557e-12		CERT2rt	99.8249	1.19593		EX_arg-L(e)	95.5118	9.49467		C226CRNt	98.132	6.63227
CYTK12	100		ABUTt2r	100	5.61557e-12		CGLYt3(2)	99.8249	1.19593		EX_ascb-L(e)	95.5118	9.49467		C2M26DCOAHLm	98.132	6.63227
CYTK12n	100		ABUTt2rL	100	5.61557e-12		CHLP	99.8249	1.19593		EX_asp-D(e)	95.5118	9.49467		C2M26DCOAHLx	98.132	6.63227
CYTK13	100		ABUTt4(2)r	100	5.61557e-12		CHLPCTD	99.8249	1.19593		EX_asp-L(e)	95.5118	9.49467		C3STDH1Pr	98.132	6.63227
CYTK13n	100		ACACT1	100	5.61557e-12		CHLtm	99.8249	1.19593		EX_atp(e)	95.5118	9.49467		C3STDH1r	98.132	6.63227
CYTK14	100		ACACT1x	100	5.61557e-12		CHOLATEt	99.8249	1.19593		EX_avite1(e)	95.5118	9.49467		C3STKR2r	98.132	6.63227
CYTK14n	100		ACACT4p	100	5.61557e-12		CHOLATEt2	99.8249	1.19593		EX_avite2(e)	95.5118	9.49467		C4STMO1r	98.132	6.63227
CYTK1m	100		ACACT5p	100	5.61557e-12		CHOLD2m	99.8249	1.19593		EX_bildglcur(e)	95.5118	9.49467		C4STMO2Pr	98.132	6.63227
CYTK1n	100		ACACT6p	100	5.61557e-12		CHOLK	99.8249	1.19593		EX_bilglcur(e)	95.5118	9.49467		C4STMO2r	98.132	6.63227
CYTK2	100		ACACT7p	100	5.61557e-12		CHOLPtg	99.8249	1.19593		EX_biocyt(e)	95.5118	9.49467		CAATPS	98.132	6.63227
CYTK2n	100		ACACT8p	100	5.61557e-12		CHOLPtl	99.8249	1.19593		EX_btn(e)	95.5118	9.49467		CAT2p	98.132	6.63227
CYTK3	100		ACACT9p	100	5.61557e-12		CHOLt4	99.8249	1.19593		EX_but(e)	95.5118	9.49467		CAt7r	98.132	6.63227
CYTK3n	100		ACALDt	100	5.61557e-12		CHOLtg	99.8249	1.19593		EX_bvite(e)	95.5118	9.49467		CATm	98.132	6.63227
CYTK4	100		ACALDtr	100	5.61557e-12		CHOLtn	99.8249	1.19593		EX_bz(e)	95.5118	9.49467		CATp	98.132	6.63227
CYTK4n	100		ACCOAL	100	5.61557e-12		CHOLtr	99.8249	1.19593		EX_camp(e)	95.5118	9.49467		CBL2OR	98.132	6.63227
CYTK5	100		ACCOALm	100	5.61557e-12		CHOLtu	99.8249	1.19593		EX_cca_d3(e)	95.5118	9.49467		CBL2tm	98.132	6.63227
CYTK5n	100		ACCOAtn	100	5.61557e-12		CHSTEROLSULT	99.8249	1.19593		EX_cholate(e)	95.5118	9.49467		CBLATm	98.132	6.63227
CYTK6	100		ACCOAtr	100	5.61557e-12		CHSTEROLt	99.8249	1.19593		EX_chtn(e)	95.5118	9.49467		CBPPer	98.132	6.63227
CYTK6n	100		ACGALFUCGALACGALFUC12GAL14ACGLCGALGLUSIDEte	100	5.61557e-12		CHSTEROLt1	99.8249	1.19593		EX_CLPND(e)	95.5118	9.49467		CBPter	98.132	6.63227
CYTK7	100		ACGALFUCGALACGALFUC12GAL14ACGLCGALGLUSIDEtg	100	5.61557e-12		CHSTEROLt2	99.8249	1.19593		EX_cmp(e)	95.5118	9.49467		CBR1	98.132	6.63227
CYTK7n	100		ACGALFUCGALACGALFUCGALACGLCGAL14ACGLCGALGLUSIDEte	100	5.61557e-12		CHSTEROLt3	99.8249	1.19593		EX_co(e)	95.5118	9.49467		CBR2	98.132	6.63227
CYTK8	100		ACGALFUCGALACGALFUCGALACGLCGAL14ACGLCGALGLUSIDEtg	100	5.61557e-12		CHSTEROLtg	99.8249	1.19593		EX_coumarin(e)	95.5118	9.49467		CCA_D3t	98.132	6.63227
CYTK8n	100		ACGALtly	100	5.61557e-12		CHTNASE	99.8249	1.19593		EX_crn(e)	95.5118	9.49467		CDIPTr	98.132	6.63227
CYTK9	100		ACGPID	100	5.61557e-12		CHTNASEe	99.8249	1.19593		EX_crtsl(e)	95.5118	9.49467		CDPDAGtm	98.132	6.63227
CYTK9n	100		ACHEe	100	5.61557e-12		CITL	99.8249	1.19593		EX_crtstrn(e)	95.5118	9.49467		CDS	98.132	6.63227
CytOxe-	100		ACHVESSEC	100	5.61557e-12		CITRtm	99.8249	1.19593		EX_csn(e)	95.5118	9.49467		CDSm	98.132	6.63227
D-LACt2	100		ACN13ACNGALGBSIDEte	100	5.61557e-12		CITt4_2	99.8249	1.19593		EX_cspg_a(e)	95.5118	9.49467		CEPTC	98.132	6.63227
D-LACtm	100		ACN13ACNGALGBSIDEtg	100	5.61557e-12		CITt4_4	99.8249	1.19593		EX_cspg_b(e)	95.5118	9.49467		CEPTE	98.132	6.63227
DADA	100		ACN23ACNGALGBSIDEte	100	5.61557e-12		CITtam	99.8249	1.19593		EX_cspg_c(e)	95.5118	9.49467		CERT1gt	98.132	6.63227
DADAe	100		ACN23ACNGALGBSIDEtg	100	5.61557e-12		CK	99.8249	1.19593		EX_cspg_d(e)	95.5118	9.49467		CERT1rt	98.132	6.63227
DADNK	100		ACNACNGAL14ACGLCGALGLUSIDEte	100	5.61557e-12		CKc	99.8249	1.19593		EX_cspg_e(e)	95.5118	9.49467		CERT2gt	98.132	6.63227
DADNt4	100		ACNACNGAL14ACGLCGALGLUSIDEtg	100	5.61557e-12		CLFORtex	99.8249	1.19593		EX_cyan(e)	95.5118	9.49467		CERT2rt	98.132	6.63227
DAG_HSter	100		ACNACNGALGBSIDEte	100	5.61557e-12		CLFORtex2	99.8249	1.19593		EX_dcsptn1(e)	95.5118	9.49467		CGLYt3(2)	98.132	6.63227
DAGK_hs	100		ACNACNGALGBSIDEtg	100	5.61557e-12		CLHCO3tex2	99.8249	1.19593		EX_debrisoquine(e)	95.5118	9.49467		CHLP	98.132	6.63227
DAGKn_hs	100		ACNGALACGLCGAL14ACGLCGALGLUSIDEte	100	5.61557e-12		CLHCOtex	99.8249	1.19593		EX_dgchol(e)	95.5118	9.49467		CHLPCTD	98.132	6.63227
DAGt	100		ACNGALACGLCGAL14ACGLCGALGLUSIDEtg	100	5.61557e-12		CLI2tex	99.8249	1.19593		EX_dheas(e)	95.5118	9.49467		CHLtm	98.132	6.63227
DALAOXx	100		ACOAD1fm	100	5.61557e-12		CLOHtex2	99.8249	1.19593		EX_dhf(e)	95.5118	9.49467		CHOLATEt	98.132	6.63227
DALAt2r	100		ACOATA	100	5.61557e-12		CLOXAtex2	99.8249	1.19593		EX_digalsgalside_hs(e)	95.5118	9.49467		CHOLATEt2	98.132	6.63227
DALAt2rL	100		ACODA	100	5.61557e-12		CLPNDCOAtx	99.8249	1.19593		EX_dlnlcg(e)	95.5118	9.49467		CHOLD2m	98.132	6.63227
DALAxt	100		ACOX22x	100	5.61557e-12		CLPNDCPT1	99.8249	1.19593		EX_dopa(e)	95.5118	9.49467		CHOLK	98.132	6.63227
DASCBH	100		ACOX2x	100	5.61557e-12		CLPNDCPT2	99.8249	1.19593		EX_eaflatoxin(e)	95.5118	9.49467		CHOLPtg	98.132	6.63227
DASCBR	100		ACS2	100	5.61557e-12		CLPNDCRNt	99.8249	1.19593		EX_ebastine(e)	95.5118	9.49467		CHOLt4	98.132	6.63227
DASPO1p	100		ACtg	100	5.61557e-12		CLPNDt	99.8249	1.19593		EX_ebastineoh(e)	95.5118	9.49467		CHOLtg	98.132	6.63227
DATPtn	100		ADEtl	100	5.61557e-12		CLS_hs	99.8249	1.19593		EX_eicostet(e)	95.5118	9.49467		CHOLtn	98.132	6.63227
DCK1n	100		ADHAPtx	100	5.61557e-12		CMPACNAtg	99.8249	1.19593		EX_estriolglc(e)	95.5118	9.49467		CHOLtr	98.132	6.63227
DCK2n	100		ADK1	100	5.61557e-12		CMPACNAtn	99.8249	1.19593		EX_etoh(e)	95.5118	9.49467		CHOLtu	98.132	6.63227
DCMPDA	100		ADK1m	100	5.61557e-12		CMPSAS	99.8249	1.19593		EX_fe2(e)	95.5118	9.49467		CHSTEROLSULT	98.132	6.63227
DCSPTN1COAtx	100		ADK3	100	5.61557e-12		CMPSASn	99.8249	1.19593		EX_fol(e)	95.5118	9.49467		CHSTEROLt	98.132	6.63227
DCSPTN1CPT1	100		ADK3m	100	5.61557e-12		CO2t	99.8249	1.19593		EX_fuc-L(e)	95.5118	9.49467		CHSTEROLt1	98.132	6.63227
DCSPTN1CPT2	100		ADMDC	100	5.61557e-12		CO2ter	99.8249	1.19593		EX_fuc13galacglcgal14acglcgalgluside_hs(e)	95.5118	9.49467		CHSTEROLt2	98.132	6.63227
DCSPTN1CRNt	100		ADNt4	100	5.61557e-12		CO2tg	99.8249	1.19593		EX_fuc14galacglcgalgluside_hs(e)	95.5118	9.49467		CHSTEROLt3	98.132	6.63227
DCSPTN1t	100		ADNt5	100	5.61557e-12		CO2tm	99.8249	1.19593		EX_fucacgalfucgalacglcgalgluside_hs(e)	95.5118	9.49467		CHSTEROLtg	98.132	6.63227
DCTPtn	100		ADNtl	100	5.61557e-12		CO2tn	99.8249	1.19593		EX_fucacngal14acglcgalgluside_hs(e)	95.5118	9.49467		CHTNASE	98.132	6.63227
DCYTD	100		ADPGLC	100	5.61557e-12		CO2tp	99.8249	1.19593		EX_fucacngalacglcgalgluside_hs(e)	95.5118	9.49467		CHTNASEe	98.132	6.63227
DCYTt	100		ADPMAN	100	5.61557e-12		COAtg	99.8249	1.19593		EX_fucfuc12gal14acglcgalgluside_hs(e)	95.5118	9.49467		CITL	98.132	6.63227
DEBRISOQUINEt	100		ADPRDPm	100	5.61557e-12		COAtl	99.8249	1.19593		EX_fucfuc132galacglcgal14acglcgalgluside_hs(e)	95.5118	9.49467		CITRtm	98.132	6.63227
DEDOLP1_L	100		ADPRIBt	100	5.61557e-12		COAtm	99.8249	1.19593		EX_fucfucfucgalacglc13galacglcgal14acglcgalgluside_hs(e)	95.5118	9.49467		CITt4_2	98.132	6.63227
DEDOLP1_U	100		ADRNt	100	5.61557e-12		COAtn	99.8249	1.19593		EX_fucfucfucgalacglcgal14acglcgalgluside_hs(e)	95.5118	9.49467		CITt4_4	98.132	6.63227
DEDOLP2_L	100		ADSELK	100	5.61557e-12		COAtp	99.8249	1.19593		EX_fucfucgalacglcgalgluside_hs(e)	95.5118	9.49467		CITtam	98.132	6.63227
DEDOLP2_U	100		AFLATOXINte	100	5.61557e-12		COAtr	99.8249	1.19593		EX_fucgal14acglcgalgluside_hs(e)	95.5118	9.49467		CK	98.132	6.63227
DEDOLR_L	100		AG13T16g	100	5.61557e-12		COKECBESr	99.8249	1.19593		EX_fucgalfucgalacglcgalgluside_hs(e)	95.5118	9.49467		CKc	98.132	6.63227
DEDOLR_U	100		AG13T17g	100	5.61557e-12		COQ3m	99.8249	1.19593		EX_fucgalgbside_hs(e)	95.5118	9.49467		CLFORtex	98.132	6.63227
DESAT16_2	100		AG13T18g	100	5.61557e-12		COQ5m	99.8249	1.19593		EX_galacglcgalgbside_hs(e)	95.5118	9.49467		CLFORtex2	98.132	6.63227
DESAT18_10	100		AGLPC	100	5.61557e-12		COQ6m	99.8249	1.19593		EX_galfuc12gal14acglcgalgluside_hs(e)	95.5118	9.49467		CLHCO3tex2	98.132	6.63227
DESAT18_3	100		AGLPED	100	5.61557e-12		COQ7m	99.8249	1.19593		EX_galfucgalacglcgal14acglcgalgluside_hs(e)	95.5118	9.49467		CLHCOtex	98.132	6.63227
DESAT18_4	100		AGLPET	100	5.61557e-12		CORE2GTg	99.8249	1.19593		EX_galgalfucfucgalacglcgalacglcgal14acglcgalgluside_hs(e)	95.5118	9.49467		CLI2tex	98.132	6.63227
DESAT18_5	100		AGLPH	100	5.61557e-12		CORE6GTg	99.8249	1.19593		EX_galgalgalthcrm_hs(e)	95.5118	9.49467		CLOHtex2	98.132	6.63227
DESAT18_6	100		AGLPR	100	5.61557e-12		COt	99.8249	1.19593		EX_gam(e)	95.5118	9.49467		CLOXAtex2	98.132	6.63227
DESAT18_7	100		AGLPT	100	5.61557e-12		COUCOAFm	99.8249	1.19593		EX_gchola(e)	95.5118	9.49467		CLPNDCOAtx	98.132	6.63227
DESAT18_8	100		AGMTm	100	5.61557e-12		COUMARINte	99.8249	1.19593		EX_gd1b2_hs(e)	95.5118	9.49467		CLPNDCPT1	98.132	6.63227
DESAT18_9	100		AGPex	100	5.61557e-12		CPCTDTX	99.8249	1.19593		EX_gd1c_hs(e)	95.5118	9.49467		CLPNDCPT2	98.132	6.63227
DESAT20_1	100		AGPRim	100	5.61557e-12		CPPPGO	99.8249	1.19593		EX_gdchola(e)	95.5118	9.49467		CLPNDCRNt	98.132	6.63227
DESAT20_2	100		AGPSx	100	5.61557e-12		CREATtmdiffir	99.8249	1.19593		EX_gdp(e)	95.5118	9.49467		CLPNDt	98.132	6.63227
DESAT22_1p	100		AHANDROSTANGLCte	100	5.61557e-12		CRNCAR3tp	99.8249	1.19593		EX_gly(e)	95.5118	9.49467		CLS_hs	98.132	6.63227
DESAT22_2p	100		AHANDROSTANGLCtr	100	5.61557e-12		CRNCARtp	99.8249	1.19593		EX_glyc-S(e)	95.5118	9.49467		CMPACNAtg	98.132	6.63227
DESAT24_1	100		AHCYStn	100	5.61557e-12		CRNt	99.8249	1.19593		EX_glygn2(e)	95.5118	9.49467		CMPACNAtn	98.132	6.63227
DGAT	100		AHEXASEly	100	5.61557e-12		CRNtHa	99.8249	1.19593		EX_glygn4(e)	95.5118	9.49467		CMPSAS	98.132	6.63227
DGCHOLte	100		AKGtp	100	5.61557e-12		CRNtim	99.8249	1.19593		EX_glygn5(e)	95.5118	9.49467		CMPSASn	98.132	6.63227
DGK1	100		AKR1C41	100	5.61557e-12		CRNtuIR	99.8249	1.19593		EX_gmp(e)	95.5118	9.49467		CO2t	98.132	6.63227
DGK2m	100		AKR1C42	100	5.61557e-12		CRNtuNa	99.8249	1.19593		EX_gp1c_hs(e)	95.5118	9.49467		CO2ter	98.132	6.63227
DGNSKm	100		ALAASNNaEx	100	5.61557e-12		CRNtx	99.8249	1.19593		EX_gp1calpha_hs(e)	95.5118	9.49467		CO2tg	98.132	6.63227
DGSNt	100		ALACYSNaEx	100	5.61557e-12		CRTSLt	99.8249	1.19593		EX_gq1b_hs(e)	95.5118	9.49467		CO2tm	98.132	6.63227
DGSNtm	100		ALADGLNexR	100	5.61557e-12		CRTSLtm	99.8249	1.19593		EX_gq1balpha_hs(e)	95.5118	9.49467		CO2tn	98.132	6.63227
DGTPtn	100		ALADGLYexR	100	5.61557e-12		CRTSLtr	99.8249	1.19593		EX_gt1a_hs(e)	95.5118	9.49467		CO2tp	98.132	6.63227
DGULND	100		ALAGLNexR	100	5.61557e-12		CRTSTRNt	99.8249	1.19593		EX_gthox(e)	95.5118	9.49467		COAtg	98.132	6.63227
DHAAt1r	100		ALAGLNNaEx	100	5.61557e-12		CRTSTRNtm	99.8249	1.19593		EX_gthrd(e)	95.5118	9.49467		COAtl	98.132	6.63227
DHAPA	100		ALAGLYexR	100	5.61557e-12		CRTSTRNtr	99.8249	1.19593		EX_gtp(e)	95.5118	9.49467		COAtm	98.132	6.63227
DHAPAx	100		ALASERNaEx	100	5.61557e-12		CRVNCtr	99.8249	1.19593		EX_hcoumarin(e)	95.5118	9.49467		COAtn	98.132	6.63227
DHCHOLESTANATEtm	100		ALASm	100	5.61557e-12		CSm	99.8249	1.19593		EX_hom-L(e)	95.5118	9.49467		COAtp	98.132	6.63227
DHCR241r	100		ALAt2r	100	5.61557e-12		CSNAT	99.8249	1.19593		EX_hpdca(e)	95.5118	9.49467		COAtr	98.132	6.63227
DHCR242r	100		ALAt2rL	100	5.61557e-12		CSNAT2m	99.8249	1.19593		EX_hspg(e)	95.5118	9.49467		COKECBESr	98.132	6.63227
DHCR243r	100		ALAt4	100	5.61557e-12		CSNAT2x	99.8249	1.19593		EX_i(e)	95.5118	9.49467		COQ3m	98.132	6.63227
DHCR71r	100		ALATHRNaEx	100	5.61557e-12		CSNAT3x	99.8249	1.19593		EX_idp(e)	95.5118	9.49467		COQ5m	98.132	6.63227
DHCR72r	100		ALAtN1	100	5.61557e-12		CSNATer	99.8249	1.19593		EX_imp(e)	95.5118	9.49467		COQ6m	98.132	6.63227
DHCRD1	100		ALCD21_D	100	5.61557e-12		CSNATm	99.8249	1.19593		EX_ksi_deg1(e)	95.5118	9.49467		COQ7m	98.132	6.63227
DHCRD2	100		ALCD21_L	100	5.61557e-12		CSNATp	99.8249	1.19593		EX_ksi(e)	95.5118	9.49467		CORE2GTg	98.132	6.63227
DHDPBMTm	100		ALCD22_D	100	5.61557e-12		CSNATr	99.8249	1.19593		EX_ksii_core4(e)	95.5118	9.49467		CORE6GTg	98.132	6.63227
DHEASt	100		ALCD22_L	100	5.61557e-12		CSNt	99.8249	1.19593		EX_Lcystin(e)	95.5118	9.49467		COt	98.132	6.63227
DHEAStr	100		ALDD20x	100	5.61557e-12		CSPG_At	99.8249	1.19593		EX_leuktrA4(e)	95.5118	9.49467		COUCOAFm	98.132	6.63227
DHEAtr	100		ALDD20xm	100	5.61557e-12		CSPG_Atly	99.8249	1.19593		EX_leuktrB4(e)	95.5118	9.49467		COUMARINte	98.132	6.63227
DHFR	100		ALDD21	100	5.61557e-12		CSPG_Bt	99.8249	1.19593		EX_lgnc(e)	95.5118	9.49467		CPCTDTX	98.132	6.63227
DHFtl	100		ALDD2x	100	5.61557e-12		CSPG_Btly	99.8249	1.19593		EX_lipoate(e)	95.5118	9.49467		CPPPGO	98.132	6.63227
DHFtm	100		ALDD2y	100	5.61557e-12		CSPG_Ct	99.8249	1.19593		EX_lnlc(e)	95.5118	9.49467		CREATtmdiffir	98.132	6.63227
DHPM1	100		ALDSTRNte	100	5.61557e-12		CSPG_Ctly	99.8249	1.19593		EX_lnlnca(e)	95.5118	9.49467		CRNCAR3tp	98.132	6.63227
DHPR	100		ALKP	100	5.61557e-12		CSPG_Dt	99.8249	1.19593		EX_lnlncg(e)	95.5118	9.49467		CRNCARtp	98.132	6.63227
DHPR2	100		ALOX12	100	5.61557e-12		CSPG_Dtly	99.8249	1.19593		EX_malt(e)	95.5118	9.49467		CRNt	98.132	6.63227
DIDPtn	100		ALOX12R	100	5.61557e-12		CSPG_Et	99.8249	1.19593		EX_mepi(e)	95.5118	9.49467		CRNtHa	98.132	6.63227
DIGALSGALSIDEte	100		ALOX15	100	5.61557e-12		CSPG_Etly	99.8249	1.19593		EX_nac(e)	95.5118	9.49467		CRNtim	98.132	6.63227
DIGALSIDEtl	100		ALOX5	100	6.08887e-12		CTPtn	99.8249	1.19593		EX_nad(e)	95.5118	9.49467		CRNtuIR	98.132	6.63227
DINt	100		ALOX52	100	6.08887e-12		CYANSTm	99.8249	1.19593		EX_nadp(e)	95.5118	9.49467		CRNtuNa	98.132	6.63227
DITPtn	100		ALR2	100	5.61557e-12		CYANt	99.8249	1.19593		EX_ncam(e)	95.5118	9.49467		CRNtx	98.132	6.63227
DLNLCGCPT1	100		ALR3	100	5.61557e-12		CYANtm	99.8249	1.19593		EX_npthl(e)	95.5118	9.49467		CRTSLt	98.132	6.63227
DLNLCGCPT2	100		AM6SAD	100	5.61557e-12		CYOOm2	99.8249	1.19593		EX_nrpphr(e)	95.5118	9.49467		CRTSLtm	98.132	6.63227
DLNLCGCRNt	100		AMACR2p	100	5.61557e-12		CYOOm3	99.8249	1.19593		EX_nrpphrsf(e)	95.5118	9.49467		CRTSLtr	98.132	6.63227
DLNLCGt	100		AMACR2r	100	5.61557e-12		CYOR-u10m	99.8249	1.19593		EX_nrvnc(e)	95.5118	9.49467		CRTSTRNt	98.132	6.63227
DM_13-cis-oretn(n)	100		AMACRp	100	5.61557e-12		CYSALANaEx	99.8249	1.19593		EX_octa(e)	95.5118	9.49467		CRTSTRNtm	98.132	6.63227
DM_13-cis-retn(n)	100		AMACRr	100	5.61557e-12		CYSASNNaEx	99.8249	1.19593		EX_oh1	95.5118	9.49467		CRTSTRNtr	98.132	6.63227
DM_Asn-X-Ser/Thr(ly)	100		AMCOXO	100	5.61557e-12		CYSGLNNaEx	99.8249	1.19593		EX_onpthl(e)	95.5118	9.49467		CRVNCtr	98.132	6.63227
DM_atp(c)	100		AMETtn	100	5.61557e-12		CYSGLUexR	99.8249	1.19593		EX_orn(e)	95.5118	9.49467		CSm	98.132	6.63227
DM_avite1(c)	100		AMPtp	100	5.61557e-12		CYSGLYex	99.8249	1.19593		EX_oxa(e)	95.5118	9.49467		CSNAT	98.132	6.63227
DM_avite2(c)	100		AMPtr	100	5.61557e-12		CYSGLYexR	99.8249	1.19593		EX_paf_hs(e)	95.5118	9.49467		CSNAT2m	98.132	6.63227
DM_bvite(c)	100		AMY1e	100	5.61557e-12		CYSSERNaEx	99.8249	1.19593		EX_peplys(e)	95.5118	9.49467		CSNAT2x	98.132	6.63227
DM_datp(m)	100		AMY2e	100	5.61557e-12		CYSt4	99.8249	1.19593		EX_pheme(e)	95.5118	9.49467		CSNAT3x	98.132	6.63227
DM_datp(n)	100		AP4AH1	100	5.61557e-12		CYSTAm	99.8249	1.19593		EX_phyQ(e)	95.5118	9.49467		CSNATer	98.132	6.63227
DM_dctp(m)	100		APAT2rm	100	5.74812e-12		CYStec	99.8249	1.19593		EX_phyt(e)	95.5118	9.49467		CSNATm	98.132	6.63227
DM_dctp(n)	100		APRTO2	100	5.61557e-12		CYSTGLUex	99.8249	1.19593		EX_pnto-R(e)	95.5118	9.49467		CSNATp	98.132	6.63227
DM_dgtp(m)	100		AQCOBALt	100	5.61557e-12		CYSTHRNaEx	99.8249	1.19593		EX_ppa(e)	95.5118	9.49467		CSNATr	98.132	6.63227
DM_dgtp(n)	100		ARAB-Lt	100	5.61557e-12		CYSTSERex	99.8249	1.19593		EX_pro-D(e)	95.5118	9.49467		CSNt	98.132	6.63227
DM_dsT_antigen(g)	100		ARABR	100	5.61557e-12		CYTD	99.8249	1.19593		EX_prostge1(e)	95.5118	9.49467		CSPG_At	98.132	6.63227
DM_dttp(m)	100		ARACHDt2	100	5.61557e-12		CYTDK1	99.8249	1.19593		EX_prostge2(e)	95.5118	9.49467		CSPG_Atly	98.132	6.63227
DM_dttp(n)	100		ARACHt	100	5.61557e-12		CYTDK2m	99.8249	1.19593		EX_ptdca(e)	95.5118	9.49467		CSPG_Bt	98.132	6.63227
DM_ethamp(r)	100		ARGDCm	100	5.61557e-12		CYTDn	99.8249	1.19593		EX_retfa(e)	95.5118	9.49467		CSPG_Btly	98.132	6.63227
DM_gpi_sig(er)	100		ARSA	100	5.61557e-12		CYTDt	99.8249	1.19593		EX_retpalm(e)	95.5118	9.49467		CSPG_Ct	98.132	6.63227
DM_kdn(c)	100		ARTFR11	100	5.61557e-12		CYTDt4	99.8249	1.19593		EX_rib-D(e)	95.5118	9.49467		CSPG_Ctly	98.132	6.63227
DM_m(em)3gacpail_prot_hs(r)	100		ARTFR202	100	5.61557e-12		CYTDt5	99.8249	1.19593		EX_ribflv(e)	95.5118	9.49467		CSPG_Dt	98.132	6.63227
DM_mem2emgacpail_prot_hs(r)	100		ARTFR203	100	5.61557e-12		CYTDtl	99.8249	1.19593		EX_s2l2fn2m2masn(e)	95.5118	9.49467		CSPG_Dtly	98.132	6.63227
DM_n5m2masn(g)	100		ARTFR204	100	5.61557e-12		CYTDtm	99.8249	1.19593		EX_s2l2n2m2masn(e)	95.5118	9.49467		CSPG_Et	98.132	6.63227
DM_oretn(n)	100		ARTFR205	100	5.61557e-12		CYTDtn	99.8249	1.19593		EX_sarcs(e)	95.5118	9.49467		CSPG_Etly	98.132	6.63227
DM_Ser-Gly/Ala-X-Gly(ly)	100		ARTFR210	100	5.61557e-12		CYTK1	99.8249	1.19593		EX_sel(e)	95.5118	9.49467		CTPtn	98.132	6.63227
DM_Ser/Thr(ly)	100		ARTFR211	100	5.61557e-12		CYTK10	99.8249	1.19593		EX_ser-D(e)	95.5118	9.49467		CYANSTm	98.132	6.63227
DM_sprm(c)	100		ASCBt	100	5.61557e-12		CYTK10n	99.8249	1.19593		EX_sl-L(e)	95.5118	9.49467		CYANt	98.132	6.63227
DM_sTn_antigen(g)	100		ASCBt4	100	5.61557e-12		CYTK11	99.8249	1.19593		EX_strch1(e)	95.5118	9.49467		CYANtm	98.132	6.63227
DM_T_antigen(g)	100		ASNALANaEx	100	5.61557e-12		CYTK11n	99.8249	1.19593		EX_strch2(e)	95.5118	9.49467		CYOOm2	98.132	6.63227
DM_yvite(c)	100		ASNCYSNaEx	100	5.61557e-12		CYTK12	99.8249	1.19593		EX_strdnc(e)	95.5118	9.49467		CYOOm3	98.132	6.63227
DMATT	100		ASNGLNNaEx	100	5.61557e-12		CYTK12n	99.8249	1.19593		EX_tagat-D(e)	95.5118	9.49467		CYSALANaEx	98.132	6.63227
DMATTx	100		ASNSERNaEx	100	5.61557e-12		CYTK13	99.8249	1.19593		EX_tchola(e)	95.5118	9.49467		CYSASNNaEx	98.132	6.63227
DMHPTCRNCPT1	100		ASNt4	100	5.61557e-12		CYTK13n	99.8249	1.19593		EX_tdchola(e)	95.5118	9.49467		CYSGLNNaEx	98.132	6.63227
DMHPTCRNCPT2	100		ASNTHRNaEx	100	5.61557e-12		CYTK14	99.8249	1.19593		EX_tethex3(e)	95.5118	9.49467		CYSGLUexR	98.132	6.63227
DMHPTCRNt	100		ASNtN1	100	5.61557e-12		CYTK14n	99.8249	1.19593		EX_tetpent3(e)	95.5118	9.49467		CYSGLYex	98.132	6.63227
DMHPTCRNte	100		ASPDt6	100	5.61557e-12		CYTK1m	99.8249	1.19593		EX_tetpent6(e)	95.5118	9.49467		CYSGLYexR	98.132	6.63227
DMNONCRNCPT2	100		ASPDxt	100	5.61557e-12		CYTK1n	99.8249	1.19593		EX_tettet6(e)	95.5118	9.49467		CYSSERNaEx	98.132	6.63227
DMNONCRNt	100		ASPt6	100	5.61557e-12		CYTK2	99.8249	1.19593		EX_thm(e)	95.5118	9.49467		CYSt4	98.132	6.63227
DNADDP	100		ATP1ter	100	5.61557e-12		CYTK2n	99.8249	1.19593		EX_thmmp(e)	95.5118	9.49467		CYSTAm	98.132	6.63227
DNADtn	100		ATP2ter	100	5.61557e-12		CYTK3	99.8249	1.19593		EX_thymd(e)	95.5118	9.49467		CYStec	98.132	6.63227
DNAMTn	100		ATPH1e	100	5.61557e-12		CYTK3n	99.8249	1.19593		EX_thyox-L(e)	95.5118	9.49467		CYSTGLUex	98.132	6.63227
DNAMTSEn	100		ATPH2e	100	5.61557e-12		CYTK4	99.8249	1.19593		EX_tmndnc(e)	95.5118	9.49467		CYSTHRNaEx	98.132	6.63227
DNDPt10m	100		ATPtm	100	5.61557e-12		CYTK4n	99.8249	1.19593		EX_tre(e)	95.5118	9.49467		CYSTSERex	98.132	6.63227
DNDPt11m	100		AVITE1t	100	5.61557e-12		CYTK5	99.8249	1.19593		EX_triodthy(e)	95.5118	9.49467		CYTD	98.132	6.63227
DNDPt12m	100		AVITE2t	100	5.61557e-12		CYTK5n	99.8249	1.19593		EX_triodthysuf(e)	95.5118	9.49467		CYTDK1	98.132	6.63227
DNDPt13m	100		B3GALT41g	100	5.61557e-12		CYTK6	99.8249	1.19593		EX_tststerone(e)	95.5118	9.49467		CYTDK2m	98.132	6.63227
DNDPt14m	100		B3GALT42g	100	5.61557e-12		CYTK6n	99.8249	1.19593		EX_tststeroneglc(e)	95.5118	9.49467		CYTDn	98.132	6.63227
DNDPt15m	100		B3GALT43g	100	5.61557e-12		CYTK7	99.8249	1.19593		EX_tsul(e)	95.5118	9.49467		CYTDt	98.132	6.63227
DNDPt16m	100		B3GALT44g	100	5.61557e-12		CYTK7n	99.8249	1.19593		EX_Tyr-ggn(e)	95.5118	9.49467		CYTDt4	98.132	6.63227
DNDPt17m	100		B3GNT11g	100	5.61557e-12		CYTK8	99.8249	1.19593		EX_udp(e)	95.5118	9.49467		CYTDt5	98.132	6.63227
DNDPt18m	100		B3GNT12g	100	5.61557e-12		CYTK8n	99.8249	1.19593		EX_ump(e)	95.5118	9.49467		CYTDtl	98.132	6.63227
DNDPt19m	100		B3GNT51g	100	5.61557e-12		CYTK9	99.8249	1.19593		EX_urate(e)	95.5118	9.49467		CYTDtm	98.132	6.63227
DNDPt1m	100		BALAtmr	100	5.74812e-12		CYTK9n	99.8249	1.19593		EX_utp(e)	95.5118	9.49467		CYTDtn	98.132	6.63227
DNDPt20m	100		BALAVECSEC	100	5.74812e-12		CytOxe-	99.8249	1.19593		EX_vitd2(e)	95.5118	9.49467		CYTK1	98.132	6.63227
DNDPt21m	100		BAMPPALDOX	100	5.61557e-12		D-LACt2	99.8249	1.19593		EX_xoltri24(e)	95.5118	9.49467		CYTK10	98.132	6.63227
DNDPt22m	100		BAMPPALDOXm	100	5.61557e-12		D-LACtm	99.8249	1.19593		EX_xoltri25(e)	95.5118	9.49467		CYTK10n	98.132	6.63227
DNDPt23m	100		BBHOX	100	5.61557e-12		DADA	99.8249	1.19593		EX_yvite(e)	95.5118	9.49467		CYTK11	98.132	6.63227
DNDPt24m	100		BETALDHx	100	5.61557e-12		DADAe	99.8249	1.19593		F1Atg	95.5118	9.49467		CYTK11n	98.132	6.63227
DNDPt25m	100		BILIRED	100	5.61557e-12		DADNK	99.8249	1.19593		F1PGT	95.5118	9.49467		CYTK12	98.132	6.63227
DNDPt26m	100		BMTer_L	100	5.61557e-12		DADNt4	99.8249	1.19593		FACOAL140i	95.5118	9.49467		CYTK12n	98.132	6.63227
DNDPt27m	100		BMTer_U	100	5.61557e-12		DAG_HSter	99.8249	1.19593		FACOAL150	95.5118	9.49467		CYTK13	98.132	6.63227
DNDPt28m	100		BTNDe	100	5.61557e-12		DAGK_hs	99.8249	1.19593		FACOAL170	95.5118	9.49467		CYTK13n	98.132	6.63227
DNDPt29m	100		BTNDm	100	5.61557e-12		DAGKn_hs	99.8249	1.19593		FACOAL180i	95.5118	9.49467		CYTK14	98.132	6.63227
DNDPt2m	100		BTNPL	100	5.61557e-12		DAGt	99.8249	1.19593		FACOAL1812	95.5118	9.49467		CYTK14n	98.132	6.63227
DNDPt30m	100		BTNPLm	100	5.61557e-12		DALAOXx	99.8249	1.19593		FACOAL1813	95.5118	9.49467		CYTK1m	98.132	6.63227
DNDPt31m	100		BTNt2m	100	5.61557e-12		DALAt2r	99.8249	1.19593		FACOAL1821	95.5118	9.49467		CYTK1n	98.132	6.63227
DNDPt32m	100		BTNt4i	100	5.61557e-12		DALAt2rL	99.8249	1.19593		FACOAL1822	95.5118	9.49467		CYTK2	98.132	6.63227
DNDPt33m	100		BUTt2m	100	5.61557e-12		DALAxt	99.8249	1.19593		FACOAL1831	95.5118	9.49467		CYTK2n	98.132	6.63227
DNDPt34m	100		BUTt2r	100	5.61557e-12		DASCBH	99.8249	1.19593		FACOAL1832	95.5118	9.49467		CYTK3	98.132	6.63227
DNDPt35m	100		BVITEt	100	5.61557e-12		DASCBR	99.8249	1.19593		FACOAL184	95.5118	9.49467		CYTK3n	98.132	6.63227
DNDPt36m	100		BZt	100	5.61557e-12		DASPO1p	99.8249	1.19593		FACOAL191	95.5118	9.49467		CYTK4	98.132	6.63227
DNDPt37m	100		BZtr	100	5.61557e-12		DCK1n	99.8249	1.19593		FACOAL203	95.5118	9.49467		CYTK4n	98.132	6.63227
DNDPt38m	100		C160CPT1	100	5.61557e-12		DCK2n	99.8249	1.19593		FACOAL2042	95.5118	9.49467		CYTK5	98.132	6.63227
DNDPt39m	100		C160CPT2	100	5.61557e-12		DCMPDA	99.8249	1.19593		FACOAL204i	95.5118	9.49467		CYTK5n	98.132	6.63227
DNDPt3m	100		C160CRNt	100	5.61557e-12		DCSPTN1COAtx	99.8249	1.19593		FACOAL205	95.5118	9.49467		CYTK6	98.132	6.63227
DNDPt40m	100		C161CPT1	100	5.61557e-12		DCSPTN1CPT1	99.8249	1.19593		FACOAL206	95.5118	9.49467		CYTK6n	98.132	6.63227
DNDPt41m	100		C161CPT12	100	5.61557e-12		DCSPTN1CPT2	99.8249	1.19593		FACOAL2251	95.5118	9.49467		CYTK7	98.132	6.63227
DNDPt42m	100		C161CPT2	100	5.61557e-12		DCSPTN1CRNt	99.8249	1.19593		FACOAL2252	95.5118	9.49467		CYTK7n	98.132	6.63227
DNDPt43m	100		C161CPT22	100	5.61557e-12		DCSPTN1t	99.8249	1.19593		FACOAL226i	95.5118	9.49467		CYTK8	98.132	6.63227
DNDPt44m	100		C161CRN2t	100	5.61557e-12		DCYTD	99.8249	1.19593		FACOAL240	95.5118	9.49467		CYTK8n	98.132	6.63227
DNDPt45m	100		C161CRNt	100	5.61557e-12		DEBRISOQUINEt	99.8249	1.19593		FACOAL241	95.5118	9.49467		CYTK9	98.132	6.63227
DNDPt46m	100		C204CPT1	100	5.85127e-12		DEDOLP1_L	99.8249	1.19593		FACOAL244_1	95.5118	9.49467		CYTK9n	98.132	6.63227
DNDPt47m	100		C204CPT2	100	5.85127e-12		DEDOLP1_U	99.8249	1.19593		FACOAL245_1	95.5118	9.49467		CytOxe-	98.132	6.63227
DNDPt48m	100		C204CRNt	100	5.85127e-12		DEDOLP2_L	99.8249	1.19593		FACOAL245_2	95.5118	9.49467		D-LACt2	98.132	6.63227
DNDPt49m	100		C2M26DCOAHLm	100	5.61557e-12		DEDOLP2_U	99.8249	1.19593		FACOAL246_1	95.5118	9.49467		D-LACtm	98.132	6.63227
DNDPt4m	100		C2M26DCOAHLx	100	5.61557e-12		DEDOLR_L	99.8249	1.19593		FACOAL80i	95.5118	9.49467		DADA	98.132	6.63227
DNDPt50m	100		CAt7r	100	5.61557e-12		DEDOLR_U	99.8249	1.19593		FADH2tx	95.5118	9.49467		DADAe	98.132	6.63227
DNDPt51m	100		CBL2OR	100	5.61557e-12		DESAT16_2	99.8249	1.19593		FADtx	95.5118	9.49467		DADNK	98.132	6.63227
DNDPt52m	100		CBL2tm	100	5.61557e-12		DESAT18_10	99.8249	1.19593		FALDH	95.5118	9.49467		DADNt4	98.132	6.63227
DNDPt53m	100		CBLATm	100	5.61557e-12		DESAT18_3	99.8249	1.19593		FALDtly	95.5118	9.49467		DAG_HSter	98.132	6.63227
DNDPt54m	100		CBPPer	100	5.61557e-12		DESAT18_4	99.8249	1.19593		FALDtm	95.5118	9.49467		DAGK_hs	98.132	6.63227
DNDPt55m	100		CBPter	100	5.61557e-12		DESAT18_5	99.8249	1.19593		FAOXC140	95.5118	9.49467		DAGKn_hs	98.132	6.63227
DNDPt56m	100		CBR1	100	5.61557e-12		DESAT18_6	99.8249	1.19593		FAOXC150m	95.5118	9.49467		DAGt	98.132	6.63227
DNDPt57m	100		CCA_D3t	100	5.61557e-12		DESAT18_7	99.8249	1.19593		FAOXC161802m	95.5118	9.49467		DALAOXx	98.132	6.63227
DNDPt58m	100		CERT2gt	100	5.61557e-12		DESAT18_8	99.8249	1.19593		FAOXC16180m	95.5118	9.49467		DALAt2r	98.132	6.63227
DNDPt59m	100		CHOLATEt	100	5.61557e-12		DESAT18_9	99.8249	1.19593		FAOXC170m	95.5118	9.49467		DALAt2rL	98.132	6.63227
DNDPt5m	100		CHOLATEt2	100	5.61557e-12		DESAT20_1	99.8249	1.19593		FAOXC1811601m	95.5118	9.49467		DALAxt	98.132	6.63227
DNDPt60m	100		CHOLt4	100	5.61557e-12		DESAT20_2	99.8249	1.19593		FAOXC1811602m	95.5118	9.49467		DASCBH	98.132	6.63227
DNDPt61m	100		CHOLtn	100	5.61557e-12		DESAT22_1p	99.8249	1.19593		FAOXC1811603m	95.5118	9.49467		DASCBR	98.132	6.63227
DNDPt62m	100		CHOLtu	100	5.61557e-12		DESAT22_2p	99.8249	1.19593		FAOXC182806m	95.5118	9.49467		DASPO1p	98.132	6.63227
DNDPt63m	100		CHSTEROLt1	100	5.61557e-12		DESAT24_1	99.8249	1.19593		FAOXC18280m	95.5118	9.49467		DCK1n	98.132	6.63227
DNDPt6m	100		CHSTEROLtg	100	5.61557e-12		DGAT	99.8249	1.19593		FAOXC183803m	95.5118	9.49467		DCK2n	98.132	6.63227
DNDPt7m	100		CHTNASE	100	5.61557e-12		DGCHOLte	99.8249	1.19593		FAOXC183806m	95.5118	9.49467		DCMPDA	98.132	6.63227
DNDPt8m	100		CHTNASEe	100	5.61557e-12		DGK1	99.8249	1.19593		FAOXC183806x	95.5118	9.49467		DCSPTN1COAtx	98.132	6.63227
DNDPt9m	100		CITRtm	100	5.61557e-12		DGULND	99.8249	1.19593		FAOXC200180x	95.5118	9.49467		DCSPTN1CPT1	98.132	6.63227
DOGULND1	100		CITt4_2	100	5.61557e-12		DHAAt1r	99.8249	1.19593		FAOXC2031836m	95.5118	9.49467		DCSPTN1CPT2	98.132	6.63227
DOGULND2	100		CITt4_4	100	5.61557e-12		DHAPA	99.8249	1.19593		FAOXC204184m	95.5118	9.49467		DCSPTN1CRNt	98.132	6.63227
DOGULNO1	100		CITtbm	100	5.73692e-12		DHAPAx	99.8249	1.19593		FAOXC2251836m	95.5118	9.49467		DCSPTN1t	98.132	6.63227
DOGULNO2	100		CK	100	5.61557e-12		DHCHOLESTANATEtm	99.8249	1.19593		FAOXC2251836x	95.5118	9.49467		DCYTD	98.132	6.63227
DOLASNT_Ler	100		CKc	100	5.61557e-12		DHCR241r	99.8249	1.19593		FAOXC2252053m	95.5118	9.49467		DEBRISOQUINEt	98.132	6.63227
DOLASNT_Uer	100		CLHCO3tex2	100	5.61557e-12		DHCR242r	99.8249	1.19593		FAOXC2252053x	95.5118	9.49467		DEDOLP1_L	98.132	6.63227
DOLDPP_Ler	100		CLHCOtex	100	5.61557e-12		DHCR243r	99.8249	1.19593		FAOXC226	95.5118	9.49467		DEDOLP1_U	98.132	6.63227
DOLDPP_Uer	100		CLI2tex	100	5.61557e-12		DHCR71r	99.8249	1.19593		FAOXC226205m	95.5118	9.49467		DEDOLP2_L	98.132	6.63227
DOLGLCP_Lter	100		CLOHtex2	100	5.61557e-12		DHCR72r	99.8249	1.19593		FAOXC240200x	95.5118	9.49467		DEDOLP2_U	98.132	6.63227
DOLGLCP_Uter	100		CLOXAtex2	100	5.61557e-12		DHCRD2	99.8249	1.19593		FAOXC2442246x	95.5118	9.49467		DEDOLR_L	98.132	6.63227
DOLGPP_Ler	100		CLPNDCPT1	100	5.61557e-12		DHDPBMTm	99.8249	1.19593		FAOXC2452253x	95.5118	9.49467		DEDOLR_U	98.132	6.63227
DOLGPP_Uer	100		CLPNDCPT2	100	5.61557e-12		DHEASt	99.8249	1.19593		FAOXC2452256x	95.5118	9.49467		DESAT16_2	98.132	6.63227
DOLICHOL_Lter	100		CLPNDCRNt	100	5.61557e-12		DHEAStr	99.8249	1.19593		FAOXC80	95.5118	9.49467		DESAT18_10	98.132	6.63227
DOLICHOL_Uter	100		CLS_hs	100	5.61557e-12		DHEAtr	99.8249	1.19593		FAS160COA	95.5118	9.49467		DESAT18_3	98.132	6.63227
DOLK_L	100		CO2tg	100	5.61557e-12		DHFtl	99.8249	1.19593		FAS180COA	95.5118	9.49467		DESAT18_4	98.132	6.63227
DOLK_U	100		CO2tn	100	5.61557e-12		DHFtm	99.8249	1.19593		FAS80COA_L	95.5118	9.49467		DESAT18_5	98.132	6.63227
DOLMANP_Lter	100		COAtl	100	5.61557e-12		DHPM1	99.8249	1.19593		FATP1t	95.5118	9.49467		DESAT18_6	98.132	6.63227
DOLMANP_Uter	100		COAtn	100	5.61557e-12		DIDPtn	99.8249	1.19593		FATP2t	95.5118	9.49467		DESAT18_7	98.132	6.63227
DOLP_Lter	100		COAtr	100	5.61557e-12		DIGALSGALSIDEte	99.8249	1.19593		FATP3t	95.5118	9.49467		DESAT18_8	98.132	6.63227
DOLP_Uter	100		COKECBESr	100	5.61557e-12		DIGALSIDEtl	99.8249	1.19593		FATP4t	95.5118	9.49467		DESAT18_9	98.132	6.63227
DOLPGT1_Ler	100		COQ3m	100	5.61557e-12		DITPtn	99.8249	1.19593		FATP5t	95.5118	9.49467		DESAT20_1	98.132	6.63227
DOLPGT1_Uer	100		COQ5m	100	5.61557e-12		DLNLCGCPT1	99.8249	1.19593		FATP6t	95.5118	9.49467		DESAT20_2	98.132	6.63227
DOLPGT2_Ler	100		COQ6m	100	5.61557e-12		DLNLCGCPT2	99.8249	1.19593		FATP7t	95.5118	9.49467		DESAT22_1p	98.132	6.63227
DOLPGT2_Uer	100		COQ7m	100	5.61557e-12		DLNLCGCRNt	99.8249	1.19593		FATP8t	95.5118	9.49467		DESAT22_2p	98.132	6.63227
DOLPGT3_Ler	100		CORE6GTg	100	5.61557e-12		DLNLCGt	99.8249	1.19593		FATP9t	95.5118	9.49467		DESAT24_1	98.132	6.63227
DOLPGT3_Uer	100		COt	100	5.61557e-12		DM_13-cis-oretn(n)	99.8249	1.19593		FBA4	95.5118	9.49467		DGAT	98.132	6.63227
DOLPH_Ler	100		COUCOAFm	100	5.61557e-12		DM_13-cis-retn(n)	99.8249	1.19593		FBP26	95.5118	9.49467		DGCHOLte	98.132	6.63227
DOLPH_Uer	100		COUMARINte	100	5.61557e-12		DM_Asn-X-Ser/Thr(ly)	99.8249	1.19593		FCLTm	95.5118	9.49467		DGK1	98.132	6.63227
DOLPMT_L	100		CPCTDTX	100	5.61557e-12		DM_atp(c)	99.8249	1.19593		FE2t	95.5118	9.49467		DGULND	98.132	6.63227
DOLPMT_U	100		CPPPGO	100	5.61557e-12		DM_avite1(c)	99.8249	1.19593		FE2tm	95.5118	9.49467		DHAAt1r	98.132	6.63227
DOLPMT1_Ler	100		CREATtmdiffir	100	5.61557e-12		DM_avite2(c)	99.8249	1.19593		FK	95.5118	9.49467		DHAPA	98.132	6.63227
DOLPMT1_Uer	100		CRNCAR3tp	100	5.61557e-12		DM_bvite(c)	99.8249	1.19593		FOLR2	95.5118	9.49467		DHAPAx	98.132	6.63227
DOLPMT2_Ler	100		CRNt	100	5.61557e-12		DM_dsT_antigen(g)	99.8249	1.19593		FOLt2	95.5118	9.49467		DHCHOLESTANATEtm	98.132	6.63227
DOLPMT2_Uer	100		CRNtHa	100	5.61557e-12		DM_gpi_sig(er)	99.8249	1.19593		FORt2m	95.5118	9.49467		DHCR241r	98.132	6.63227
DOLPMT3_Ler	100		CRNtuIR	100	5.61557e-12		DM_kdn(c)	99.8249	1.19593		FORtrn	95.5118	9.49467		DHCR242r	98.132	6.63227
DOLPMT3_Uer	100		CRNtuNa	100	5.61557e-12		DM_m(em)3gacpail_prot_hs(r)	99.8249	1.19593		FPGS	95.5118	9.49467		DHCR243r	98.132	6.63227
DOLPMT4_Ler	100		CRNtx	100	5.61557e-12		DM_mem2emgacpail_prot_hs(r)	99.8249	1.19593		FPGS2	95.5118	9.49467		DHCR71r	98.132	6.63227
DOLPMT4_Uer	100		CRTSLt	100	5.61557e-12		DM_n5m2masn(g)	99.8249	1.19593		FPGS3	95.5118	9.49467		DHCR72r	98.132	6.63227
DOPABMO	100		CRTSLtm	100	5.61557e-12		DM_oretn(n)	99.8249	1.19593		FPGS3m	95.5118	9.49467		DHCRD2	98.132	6.63227
DOPAMT	100		CRTSLtr	100	5.61557e-12		DM_Ser-Gly/Ala-X-Gly(ly)	99.8249	1.19593		FPGS5	95.5118	9.49467		DHDPBMTm	98.132	6.63227
DOPASFt	100		CRTSTRNt	100	5.61557e-12		DM_Ser/Thr(ly)	99.8249	1.19593		FPGS6	95.5118	9.49467		DHEASt	98.132	6.63227
DOPASULT	100		CRTSTRNtm	100	5.61557e-12		DM_sprm(c)	99.8249	1.19593		FPGS6m	95.5118	9.49467		DHEAStr	98.132	6.63227
DOPAt4(2)r	100		CRTSTRNtr	100	5.61557e-12		DM_sTn_antigen(g)	99.8249	1.19593		FPGS7	95.5118	9.49467		DHEAtr	98.132	6.63227
DOPAtu	100		CRVNCtr	100	5.61557e-12		DM_T_antigen(g)	99.8249	1.19593		FPGS8	95.5118	9.49467		DHFtl	98.132	6.63227
DOPAVESSEC	100		CSNAT	100	5.61557e-12		DM_yvite(c)	99.8249	1.19593		FPGS9	95.5118	9.49467		DHFtm	98.132	6.63227
DPCOAK	100		CSNAT2m	100	5.61557e-12		DMATT	99.8249	1.19593		FPGS9m	95.5118	9.49467		DHPM1	98.132	6.63227
DPCOAPP	100		CSNAT2x	100	5.61557e-12		DMATTx	99.8249	1.19593		FRTT	95.5118	9.49467		DIDPtn	98.132	6.63227
DPCOAtl	100		CSNAT3x	100	5.61557e-12		DMHPTCRNCPT1	99.8249	1.19593		FRUt1r	95.5118	9.49467		DIGALSGALSIDEte	98.132	6.63227
DPHMBDCm	100		CSNATer	100	5.61557e-12		DMHPTCRNCPT2	99.8249	1.19593		FRUt4	95.5118	9.49467		DIGALSIDEtl	98.132	6.63227
DPMVDx	100		CSNATr	100	5.61557e-12		DMHPTCRNt	99.8249	1.19593		FTHFCL	95.5118	9.49467		DITPtn	98.132	6.63227
DRIBt	100		CSNt	100	5.61557e-12		DMHPTCRNte	99.8249	1.19593		FTHFLm	95.5118	9.49467		DLNLCGCPT1	98.132	6.63227
DRPA	100		CSPG_At	100	5.61557e-12		DMNONCRNCPT2	99.8249	1.19593		FUC13GALACGLCGAL14ACGLCGALGLUSIDEte	95.5118	9.49467		DLNLCGCPT2	98.132	6.63227
DSAT	100		CSPG_Atly	100	5.61557e-12		DMNONCRNt	99.8249	1.19593		FUC13GALACGLCGAL14ACGLCGALGLUSIDEtg	95.5118	9.49467		DLNLCGCRNt	98.132	6.63227
DTDPtn	100		CSPG_Bt	100	5.61557e-12		DNADDP	99.8249	1.19593		FUC14GALACGLCGALGLUSIDEte	95.5118	9.49467		DLNLCGt	98.132	6.63227
DTMPK	100		CSPG_Btly	100	5.61557e-12		DNADtn	99.8249	1.19593		FUC14GALACGLCGALGLUSIDEtg	95.5118	9.49467		DM_13-cis-oretn(n)	98.132	6.63227
DTTPtn	100		CSPG_Ct	100	5.61557e-12		DNAMTn	99.8249	1.19593		FUCACGALFUCGALACGLCGALGLUSIDEte	95.5118	9.49467		DM_13-cis-retn(n)	98.132	6.63227
DUDPtn	100		CSPG_Ctly	100	5.61557e-12		DNAMTSEn	99.8249	1.19593		FUCACGALFUCGALACGLCGALGLUSIDEtg	95.5118	9.49467		DM_Asn-X-Ser/Thr(ly)	98.132	6.63227
DUMPtn	100		CSPG_Dt	100	5.61557e-12		DNDPt10m	99.8249	1.19593		FUCACNGAL14ACGLCGALGLUSIDEte	95.5118	9.49467		DM_atp(c)	98.132	6.63227
DURAD	100		CSPG_Dtly	100	5.61557e-12		DNDPt11m	99.8249	1.19593		FUCACNGAL14ACGLCGALGLUSIDEtg	95.5118	9.49467		DM_avite1(c)	98.132	6.63227
DURAD2	100		CSPG_Et	100	5.61557e-12		DNDPt14m	99.8249	1.19593		FUCACNGALACGLCGALGLUSIDEte	95.5118	9.49467		DM_avite2(c)	98.132	6.63227
DURIK1	100		CSPG_Etly	100	5.61557e-12		DNDPt15m	99.8249	1.19593		FUCACNGALACGLCGALGLUSIDEtg	95.5118	9.49467		DM_bvite(c)	98.132	6.63227
DURIK1m	100		CTPtn	100	6.09079e-12		DNDPt16m	99.8249	1.19593		FUCASE2e	95.5118	9.49467		DM_dsT_antigen(g)	98.132	6.63227
DURIPP	100		CYANt	100	5.61557e-12		DNDPt17m	99.8249	1.19593		FUCASE2ly	95.5118	9.49467		DM_gpi_sig(er)	98.132	6.63227
DURIt	100		CYOOm3	100	5.61557e-12		DNDPt22m	99.8249	1.19593		FUCASEe	95.5118	9.49467		DM_kdn(c)	98.132	6.63227
DURItn	100		CYSALANaEx	100	5.61557e-12		DNDPt23m	99.8249	1.19593		FUCASEly	95.5118	9.49467		DM_m(em)3gacpail_prot_hs(r)	98.132	6.63227
DUTPDPm	100		CYSASNNaEx	100	5.61557e-12		DNDPt24m	99.8249	1.19593		FUCFUC12GAL14ACGLCGALGLUSIDEte	95.5118	9.49467		DM_mem2emgacpail_prot_hs(r)	98.132	6.63227
DUTPDPn	100		CYSGLNNaEx	100	5.61557e-12		DNDPt25m	99.8249	1.19593		FUCFUC12GAL14ACGLCGALGLUSIDEtg	95.5118	9.49467		DM_n5m2masn(g)	98.132	6.63227
EAFLATOXINte	100		CYSGLUexR	100	5.61557e-12		DNDPt26m	99.8249	1.19593		FUCFUC132GALACGLCGAL14ACGLCGALGLUSIDEte	95.5118	9.49467		DM_oretn(n)	98.132	6.63227
EBASTINEOHte	100		CYSGLYex	100	5.61557e-12		DNDPt27m	99.8249	1.19593		FUCFUC132GALACGLCGAL14ACGLCGALGLUSIDEtg	95.5118	9.49467		DM_Ser-Gly/Ala-X-Gly(ly)	98.132	6.63227
EBASTINEte	100		CYSGLYexR	100	5.61557e-12		DNDPt28m	99.8249	1.19593		FUCFUCFUCGALACGLC13GALACGLCGAL14ACGLCGALGLUSIDEte	95.5118	9.49467		DM_Ser/Thr(ly)	98.132	6.63227
EBP1r	100		CYSSERNaEx	100	5.61557e-12		DNDPt29m	99.8249	1.19593		FUCFUCFUCGALACGLC13GALACGLCGAL14ACGLCGALGLUSIDEtg	95.5118	9.49467		DM_sprm(c)	98.132	6.63227
EBP2r	100		CYSt4	100	5.61557e-12		DNDPt33m	99.8249	1.19593		FUCFUCFUCGALACGLCGAL14ACGLCGALGLUSIDEte	95.5118	9.49467		DM_sTn_antigen(g)	98.132	6.63227
ECOAH1m	100		CYSTAm	100	5.61557e-12		DNDPt34m	99.8249	1.19593		FUCFUCFUCGALACGLCGAL14ACGLCGALGLUSIDEtg	95.5118	9.49467		DM_T_antigen(g)	98.132	6.63227
ECOAH1x	100		CYStec	100	5.61557e-12		DNDPt35m	99.8249	1.19593		FUCFUCGALACGLCGALGLUSIDEte	95.5118	9.49467		DM_yvite(c)	98.132	6.63227
ECOAH9m	100		CYSTGLUex	100	5.61557e-12		DNDPt36m	99.8249	1.19593		FUCFUCGALACGLCGALGLUSIDEtg	95.5118	9.49467		DMATT	98.132	6.63227
EGMESTr	100		CYSTHRNaEx	100	5.61557e-12		DNDPt37m	99.8249	1.19593		FUCGAL14ACGLCGALGLUSIDEte	95.5118	9.49467		DMATTx	98.132	6.63227
EHGLAT	100		CYSTSERex	100	5.61557e-12		DNDPt38m	99.8249	1.19593		FUCGAL14ACGLCGALGLUSIDEtg	95.5118	9.49467		DMHPTCRNCPT1	98.132	6.63227
EHGLAT2m	100		CYTDt4	100	5.61557e-12		DNDPt39m	99.8249	1.19593		FUCGALFUCGALACGLCGALGLUSIDEte	95.5118	9.49467		DMHPTCRNCPT2	98.132	6.63227
EHGLATm	100		CYTDt5	100	5.61557e-12		DNDPt3m	99.8249	1.19593		FUCGALFUCGALACGLCGALGLUSIDEtg	95.5118	9.49467		DMHPTCRNt	98.132	6.63227
EICOSTETCPT1	100		CYTDtl	100	5.61557e-12		DNDPt40m	99.8249	1.19593		FUCGALGBSIDEte	95.5118	9.49467		DMHPTCRNte	98.132	6.63227
EICOSTETCPT2	100		CYTK1	100	5.61557e-12		DNDPt41m	99.8249	1.19593		FUCGALGBSIDEtg	95.5118	9.49467		DMNONCRNCPT2	98.132	6.63227
EICOSTETCRNt	100		CYTK10	100	5.61557e-12		DNDPt46m	99.8249	1.19593		FUCtly	95.5118	9.49467		DMNONCRNt	98.132	6.63227
EICOSTETt	100		CYTK10n	100	5.61557e-12		DNDPt47m	99.8249	1.19593		FUMAC	95.5118	9.49467		DNADDP	98.132	6.63227
ELAIDCPT1	100		CYTK11	100	5.61557e-12		DNDPt48m	99.8249	1.19593		FUMm	95.5118	9.49467		DNADtn	98.132	6.63227
ELAIDCPT2	100		CYTK11n	100	5.61557e-12		DNDPt49m	99.8249	1.19593		FUMSO3tm	95.5118	9.49467		DNAMTn	98.132	6.63227
ELAIDCRNt	100		CYTK12	100	5.61557e-12		DNDPt4m	99.8249	1.19593		FUT11g	95.5118	9.49467		DNAMTSEn	98.132	6.63227
ELAIDt	100		CYTK12n	100	5.61557e-12		DNDPt50m	99.8249	1.19593		FUT12g	95.5118	9.49467		DNDPt10m	98.132	6.63227
ENGASE	100		CYTK13	100	5.61557e-12		DNDPt51m	99.8249	1.19593		FUT14g	95.5118	9.49467		DNDPt11m	98.132	6.63227
ENGASE2	100		CYTK13n	100	5.61557e-12		DNDPt52m	99.8249	1.19593		FUT15g	95.5118	9.49467		DNDPt14m	98.132	6.63227
ENGASE2ly	100		CYTK14	100	5.61557e-12		DNDPt53m	99.8249	1.19593		FUT16g	95.5118	9.49467		DNDPt15m	98.132	6.63227
ENMAN1g	100		CYTK14n	100	5.61557e-12		DNDPt54m	99.8249	1.19593		FUT17g	95.5118	9.49467		DNDPt16m	98.132	6.63227
ENMAN2g	100		CYTK1n	100	5.61557e-12		DNDPt59m	99.8249	1.19593		FUT18g	95.5118	9.49467		DNDPt17m	98.132	6.63227
ENMAN3g	100		CYTK2	100	5.61557e-12		DNDPt5m	99.8249	1.19593		FUT31g	95.5118	9.49467		DNDPt22m	98.132	6.63227
ENMAN4g	100		CYTK2n	100	5.61557e-12		DNDPt60m	99.8249	1.19593		FUT32g	95.5118	9.49467		DNDPt23m	98.132	6.63227
ENMAN5g	100		CYTK3	100	5.61557e-12		DNDPt61m	99.8249	1.19593		FUT33g	95.5118	9.49467		DNDPt24m	98.132	6.63227
ENMAN6g	100		CYTK3n	100	5.61557e-12		DNDPt62m	99.8249	1.19593		FUT34g	95.5118	9.49467		DNDPt25m	98.132	6.63227
ENO	100		CYTK4	100	5.61557e-12		DNDPt63m	99.8249	1.19593		FUT35g	95.5118	9.49467		DNDPt26m	98.132	6.63227
ESTRADIOLGLCt	100		CYTK4n	100	5.61557e-12		DNDPt6m	99.8249	1.19593		FUT910g	95.5118	9.49467		DNDPt27m	98.132	6.63227
ESTRADIOLGLCt2	100		CYTK5	100	5.61557e-12		DNDPt7m	99.8249	1.19593		FUT911g	95.5118	9.49467		DNDPt28m	98.132	6.63227
ESTRADIOLGLCtr	100		CYTK5n	100	5.61557e-12		DNDPt8m	99.8249	1.19593		FUT91g	95.5118	9.49467		DNDPt29m	98.132	6.63227
ESTRADIOLt	100		CYTK6	100	5.61557e-12		DNDPt9m	99.8249	1.19593		FUT92g	95.5118	9.49467		DNDPt33m	98.132	6.63227
ESTRADIOLtr	100		CYTK6n	100	5.61557e-12		DOGULND1	99.8249	1.19593		FUT93g	95.5118	9.49467		DNDPt34m	98.132	6.63227
ESTRIOLGLCte	100		CYTK7	100	5.61557e-12		DOGULND2	99.8249	1.19593		FUT94g	95.5118	9.49467		DNDPt35m	98.132	6.63227
ESTRIOLGLCtr	100		CYTK7n	100	5.61557e-12		DOGULNO1	99.8249	1.19593		FUT95g	95.5118	9.49467		DNDPt36m	98.132	6.63227
ESTRONEGLCt	100		CYTK8	100	5.61557e-12		DOGULNO2	99.8249	1.19593		FUT96g	95.5118	9.49467		DNDPt37m	98.132	6.63227
ESTRONEGLCtr	100		CYTK8n	100	5.61557e-12		DOLASNT_Ler	99.8249	1.19593		FUT97g	95.5118	9.49467		DNDPt38m	98.132	6.63227
ESTRONESt	100		CYTK9	100	5.61557e-12		DOLASNT_Uer	99.8249	1.19593		FUT98g	95.5118	9.49467		DNDPt39m	98.132	6.63227
ESTRONESt2	100		CYTK9n	100	5.61557e-12		DOLDPP_Ler	99.8249	1.19593		FUT99g	95.5118	9.49467		DNDPt3m	98.132	6.63227
ESTRONEtr	100		D-LACtm	100	5.61557e-12		DOLDPP_Uer	99.8249	1.19593		G12MT1_U	95.5118	9.49467		DNDPt40m	98.132	6.63227
ESTSULT	100		DAG_HSter	100	5.61557e-12		DOLGLCP_Lter	99.8249	1.19593		G12MT2_U	95.5118	9.49467		DNDPt41m	98.132	6.63227
ETF	100		DAGKn_hs	100	5.61557e-12		DOLGLCP_Uter	99.8249	1.19593		G13MT_U	95.5118	9.49467		DNDPt46m	98.132	6.63227
ETFQO	100		DALAt2r	100	5.61557e-12		DOLGPP_Ler	99.8249	1.19593		G14T18g	95.5118	9.49467		DNDPt47m	98.132	6.63227
ETHAK	100		DALAt2rL	100	5.61557e-12		DOLGPP_Uer	99.8249	1.19593		G14T19g	95.5118	9.49467		DNDPt48m	98.132	6.63227
ETHP	100		DASCBH	100	5.61557e-12		DOLICHOL_Lter	99.8249	1.19593		G14T20g	95.5118	9.49467		DNDPt49m	98.132	6.63227
ETOHMO	100		DASPO1p	100	5.61557e-12		DOLICHOL_Uter	99.8249	1.19593		G14T21g	95.5118	9.49467		DNDPt4m	98.132	6.63227
ETOHt	100		DCK1n	100	5.61557e-12		DOLK_L	99.8249	1.19593		G14T2g	95.5118	9.49467		DNDPt50m	98.132	6.63227
ETOHtx	100		DCK2n	100	5.61557e-12		DOLK_U	99.8249	1.19593		G14T3g	95.5118	9.49467		DNDPt51m	98.132	6.63227
EX_10fthf(e)	100		DEBRISOQUINEt	100	5.61557e-12		DOLMANP_Lter	99.8249	1.19593		G14T4g	95.5118	9.49467		DNDPt52m	98.132	6.63227
EX_10fthf5glu(e)	100		DESAT18_10	100	5.61557e-12		DOLMANP_Uter	99.8249	1.19593		G14T5g	95.5118	9.49467		DNDPt53m	98.132	6.63227
EX_10fthf6glu(e)	100		DESAT18_9	100	5.61557e-12		DOLP_Lter	99.8249	1.19593		G16MT_U	95.5118	9.49467		DNDPt54m	98.132	6.63227
EX_10fthf7glu(e)	100		DESAT20_1	100	5.61557e-12		DOLP_Uter	99.8249	1.19593		G1M6MASNB1terg	95.5118	9.49467		DNDPt59m	98.132	6.63227
EX_11-cis-retfa(e)	100		DESAT20_2	100	5.61557e-12		DOLPGT1_Ler	99.8249	1.19593		G1M7MASNBterg	95.5118	9.49467		DNDPt5m	98.132	6.63227
EX_13-cis-retnglc(e)	100		DESAT24_1	100	5.61557e-12		DOLPGT1_Uer	99.8249	1.19593		G1M7MASNCterg	95.5118	9.49467		DNDPt60m	98.132	6.63227
EX_1glyc_hs(e)	100		DGCHOLte	100	5.61557e-12		DOLPGT2_Ler	99.8249	1.19593		G1M8MASNterg	95.5118	9.49467		DNDPt61m	98.132	6.63227
EX_1mncam(e)	100		DHAPA	100	5.61557e-12		DOLPGT2_Uer	99.8249	1.19593		G2M8MASNterg	95.5118	9.49467		DNDPt62m	98.132	6.63227
EX_2425dhvitd2(e)	100		DHAPAx	100	5.61557e-12		DOLPGT3_Ler	99.8249	1.19593		G3M8MASNterg	95.5118	9.49467		DNDPt63m	98.132	6.63227
EX_2425dhvitd3(e)	100		DHCHOLESTANATEtm	100	5.61557e-12		DOLPGT3_Uer	99.8249	1.19593		G3PD2m	95.5118	9.49467		DNDPt6m	98.132	6.63227
EX_24nph(e)	100		DHDPBMTm	100	5.73663e-12		DOLPH_Ler	99.8249	1.19593		G5SADs	95.5118	9.49467		DNDPt7m	98.132	6.63227
EX_25hvitd2(e)	100		DHEASt	100	5.61557e-12		DOLPH_Uer	99.8249	1.19593		G6PDA	95.5118	9.49467		DNDPt8m	98.132	6.63227
EX_25hvitd3(e)	100		DHEAStr	100	5.61557e-12		DOLPMT_L	99.8249	1.19593		G6PDH1er	95.5118	9.49467		DNDPt9m	98.132	6.63227
EX_35cgmp(e)	100		DHEAtr	100	5.61557e-12		DOLPMT_U	99.8249	1.19593		G6PDH1rer	95.5118	9.49467		DOGULND1	98.132	6.63227
EX_3mlda(e)	100		DHPM1	100	5.61557e-12		DOLPMT1_Ler	99.8249	1.19593		G6PDH2rer	95.5118	9.49467		DOGULND2	98.132	6.63227
EX_4abut(e)	100		DIDPtn	100	5.61557e-12		DOLPMT1_Uer	99.8249	1.19593		GABAVESSEC	95.5118	9.49467		DOGULNO1	98.132	6.63227
EX_4hdebrisoquine(e)	100		DIGALSGALSIDEte	100	5.61557e-12		DOLPMT2_Ler	99.8249	1.19593		GACPAILter	95.5118	9.49467		DOGULNO2	98.132	6.63227
EX_4hphac(e)	100		DIGALSIDEtl	100	5.61557e-12		DOLPMT2_Uer	99.8249	1.19593		GALACGLCGALGBSIDEte	95.5118	9.49467		DOLASNT_Ler	98.132	6.63227
EX_4mptnl(e)	100		DITPtn	100	5.61557e-12		DOLPMT3_Ler	99.8249	1.19593		GALASE10ly	95.5118	9.49467		DOLASNT_Uer	98.132	6.63227
EX_4nph(e)	100		DLNLCGCPT1	100	5.61557e-12		DOLPMT3_Uer	99.8249	1.19593		GALASE11ly	95.5118	9.49467		DOLDPP_Ler	98.132	6.63227
EX_4nphsf(e)	100		DLNLCGCPT2	100	5.61557e-12		DOLPMT4_Ler	99.8249	1.19593		GALASE12ly	95.5118	9.49467		DOLDPP_Uer	98.132	6.63227
EX_4pyrdx(e)	100		DLNLCGCRNt	100	5.61557e-12		DOLPMT4_Uer	99.8249	1.19593		GALASE13ly	95.5118	9.49467		DOLGLCP_Lter	98.132	6.63227
EX_5adtststerone(e)	100		DLNLCGt	100	5.61557e-12		DOPABMO	99.8249	1.19593		GALASE14ly	95.5118	9.49467		DOLGLCP_Uter	98.132	6.63227
EX_5adtststeroneglc(e)	100		DM_13-cis-oretn(n)	100	5.61557e-12		DOPAMT	99.8249	1.19593		GALASE15ly	95.5118	9.49467		DOLGPP_Ler	98.132	6.63227
EX_5dhf(e)	100		DM_13-cis-retn(n)	100	5.61557e-12		DOPASFt	99.8249	1.19593		GALASE18ly	95.5118	9.49467		DOLGPP_Uer	98.132	6.63227
EX_5fthf(e)	100		DM_avite1(c)	100	5.61557e-12		DOPASULT	99.8249	1.19593		GALASE19ly	95.5118	9.49467		DOLICHOL_Lter	98.132	6.63227
EX_5htrp(e)	100		DM_avite2(c)	100	5.61557e-12		DOPAt4(2)r	99.8249	1.19593		GALASE1ly	95.5118	9.49467		DOLICHOL_Uter	98.132	6.63227
EX_5mthf(e)	100		DM_bvite(c)	100	5.61557e-12		DOPAtu	99.8249	1.19593		GALASE20ly	95.5118	9.49467		DOLK_L	98.132	6.63227
EX_5thf(e)	100		DM_gpi_sig(er)	100	5.61557e-12		DOPAVESSEC	99.8249	1.19593		GALASE3ly	95.5118	9.49467		DOLK_U	98.132	6.63227
EX_6dhf(e)	100		DM_m(em)3gacpail_prot_hs(r)	100	5.61557e-12		DPCOAK	99.8249	1.19593		GALASE4ly	95.5118	9.49467		DOLMANP_Lter	98.132	6.63227
EX_6htststerone(e)	100		DM_mem2emgacpail_prot_hs(r)	100	5.61557e-12		DPCOAPP	99.8249	1.19593		GALASE5ly	95.5118	9.49467		DOLMANP_Uter	98.132	6.63227
EX_6thf(e)	100		DM_oretn(n)	100	5.61557e-12		DPCOAtl	99.8249	1.19593		GALASE6ly	95.5118	9.49467		DOLP_Lter	98.132	6.63227
EX_7dhf(e)	100		DM_Ser-Gly/Ala-X-Gly(ly)	100	5.61557e-12		DPHMBDCm	99.8249	1.19593		GALASE7ly	95.5118	9.49467		DOLP_Uter	98.132	6.63227
EX_7thf(e)	100		DM_sprm(c)	100	5.61557e-12		DPMVDx	99.8249	1.19593		GALASE8ly	95.5118	9.49467		DOLPGT1_Ler	98.132	6.63227
EX_9-cis-retfa(e)	100		DM_yvite(c)	100	5.61557e-12		DRIBt	99.8249	1.19593		GALASE9ly	95.5118	9.49467		DOLPGT1_Uer	98.132	6.63227
EX_abt(e)	100		DMATT	100	5.61557e-12		DRPA	99.8249	1.19593		GALC	95.5118	9.49467		DOLPGT2_Ler	98.132	6.63227
EX_ac(e)	100		DMHPTCRNCPT1	100	5.61557e-12		DTDPtn	99.8249	1.19593		GALFUC12GAL14ACGLCGALGLUSIDEte	95.5118	9.49467		DOLPGT2_Uer	98.132	6.63227
EX_acac(e)	100		DMHPTCRNCPT2	100	5.61557e-12		DTTPtn	99.8249	1.19593		GALFUC12GAL14ACGLCGALGLUSIDEtg	95.5118	9.49467		DOLPGT3_Ler	98.132	6.63227
EX_acald(e)	100		DMHPTCRNt	100	5.61557e-12		DUDPtn	99.8249	1.19593		GALFUCGALACGLCGAL14ACGLCGALGLUSIDEte	95.5118	9.49467		DOLPGT3_Uer	98.132	6.63227
EX_acetone(e)	100		DMHPTCRNte	100	5.61557e-12		DUMPtn	99.8249	1.19593		GALFUCGALACGLCGAL14ACGLCGALGLUSIDEtg	95.5118	9.49467		DOLPH_Ler	98.132	6.63227
EX_acgalfucgalacgalfuc12gal14acglcgalgluside_hs(e)	100		DMNONCRNCPT2	100	5.61557e-12		DURAD	99.8249	1.19593		GALGALFUCFUCGALACGLCGALACGLCGAL14ACGLCGALGLUSIDEte	95.5118	9.49467		DOLPH_Uer	98.132	6.63227
EX_acgalfucgalacgalfucgalacglcgal14acglcgalgluside_hs(e)	100		DMNONCRNt	100	5.61557e-12		DURAD2	99.8249	1.19593		GALGALFUCFUCGALACGLCGALACGLCGAL14ACGLCGALGLUSIDEtg	95.5118	9.49467		DOLPMT_L	98.132	6.63227
EX_acgam(e)	100		DNAMTn	100	5.61557e-12		DURIK1	99.8249	1.19593		GALGALGALTHCRMte	95.5118	9.49467		DOLPMT_U	98.132	6.63227
EX_ach(e)	100		DNAMTSEn	100	5.61557e-12		DURIK1m	99.8249	1.19593		GALK	95.5118	9.49467		DOLPMT1_Ler	98.132	6.63227
EX_acn13acngalgbside_hs(e)	100		DNDPt10m	100	5.61557e-12		DURItn	99.8249	1.19593		GALNACT1g	95.5118	9.49467		DOLPMT1_Uer	98.132	6.63227
EX_acn23acngalgbside_hs(e)	100		DNDPt11m	100	5.61557e-12		DUTPDPm	99.8249	1.19593		GALNACT2g	95.5118	9.49467		DOLPMT2_Ler	98.132	6.63227
EX_acnacngal14acglcgalgluside_hs(e)	100		DNDPt14m	100	5.61557e-12		DUTPDPn	99.8249	1.19593		GALNACT3g	95.5118	9.49467		DOLPMT2_Uer	98.132	6.63227
EX_acnacngalgbside_hs(e)	100		DNDPt15m	100	5.61557e-12		EAFLATOXINte	99.8249	1.19593		GALNACT4g	95.5118	9.49467		DOLPMT3_Ler	98.132	6.63227
EX_acngalacglcgal14acglcgalgluside_hs(e)	100		DNDPt16m	100	5.61557e-12		EBASTINEOHte	99.8249	1.19593		GALNACT5g	95.5118	9.49467		DOLPMT3_Uer	98.132	6.63227
EX_ade(e)	100		DNDPt17m	100	5.61557e-12		EBASTINEte	99.8249	1.19593		GALOR	95.5118	9.49467		DOLPMT4_Ler	98.132	6.63227
EX_adn(e)	100		DNDPt22m	100	5.61557e-12		EBP1r	99.8249	1.19593		GALSIDEtl	95.5118	9.49467		DOLPMT4_Uer	98.132	6.63227
EX_adp	100		DNDPt23m	100	5.61557e-12		EBP2r	99.8249	1.19593		GALt1r	95.5118	9.49467		DOPABMO	98.132	6.63227
EX_adprbp(e)	100		DNDPt24m	100	5.61557e-12		ECOAH1m	99.8249	1.19593		GALt2_2	95.5118	9.49467		DOPAMT	98.132	6.63227
EX_adprib(e)	100		DNDPt25m	100	5.61557e-12		ECOAH1x	99.8249	1.19593		GALT2g	95.5118	9.49467		DOPASFt	98.132	6.63227
EX_adrn(e)	100		DNDPt26m	100	5.61557e-12		ECOAH9m	99.8249	1.19593		GALt4	95.5118	9.49467		DOPASULT	98.132	6.63227
EX_adrnl(e)	100		DNDPt27m	100	5.61557e-12		EGMESTr	99.8249	1.19593		GALt4_2	95.5118	9.49467		DOPAt4(2)r	98.132	6.63227
EX_aflatoxin(e)	100		DNDPt28m	100	5.61557e-12		EHGLAT	99.8249	1.19593		GALTg	95.5118	9.49467		DOPAtu	98.132	6.63227
EX_ahandrostanglc(e)	100		DNDPt29m	100	5.61557e-12		EHGLAT2m	99.8249	1.19593		GAMt1r	95.5118	9.49467		DOPAVESSEC	98.132	6.63227
EX_ak2lgchol_hs(e)	100		DNDPt33m	100	5.61557e-12		EHGLATm	99.8249	1.19593		GAMYe	95.5118	9.49467		DPCOAK	98.132	6.63227
EX_akg(e)	100		DNDPt34m	100	5.61557e-12		EICOSTETCPT1	99.8249	1.19593		GAO1	95.5118	9.49467		DPCOAPP	98.132	6.63227
EX_ala-B(e)	100		DNDPt35m	100	5.61557e-12		EICOSTETCPT2	99.8249	1.19593		GAO2	95.5118	9.49467		DPCOAtl	98.132	6.63227
EX_ala-D(e)	100		DNDPt36m	100	5.61557e-12		EICOSTETCRNt	99.8249	1.19593		GASNASE3ly	95.5118	9.49467		DPHMBDCm	98.132	6.63227
EX_ala-L(e)	100		DNDPt37m	100	5.61557e-12		EICOSTETt	99.8249	1.19593		GASNASEly	95.5118	9.49467		DPMVDx	98.132	6.63227
EX_aldstrn(e)	100		DNDPt38m	100	5.61557e-12		ELAIDCPT1	99.8249	1.19593		GCALDD	95.5118	9.49467		DRIBt	98.132	6.63227
EX_amp(e)	100		DNDPt39m	100	5.61557e-12		ELAIDCPT2	99.8249	1.19593		GCALDDm	95.5118	9.49467		DRPA	98.132	6.63227
EX_andrstrn(e)	100		DNDPt3m	100	5.61557e-12		ELAIDCRNt	99.8249	1.19593		GCC2am	95.5118	9.49467		DTDPtn	98.132	6.63227
EX_andrstrnglc(e)	100		DNDPt40m	100	5.61557e-12		ELAIDt	99.8249	1.19593		GCC2bim	95.5118	9.49467		DTTPtn	98.132	6.63227
EX_aqcobal(e)	100		DNDPt41m	100	5.61557e-12		ENGASE	99.8249	1.19593		GCC2cm	95.5118	9.49467		DUDPtn	98.132	6.63227
EX_arab-L(e)	100		DNDPt46m	100	5.61557e-12		ENGASE2	99.8249	1.19593		GCCam	95.5118	9.49467		DUMPtn	98.132	6.63227
EX_arach(e)	100		DNDPt47m	100	5.61557e-12		ENGASE2ly	99.8249	1.19593		GCCbim	95.5118	9.49467		DURAD	98.132	6.63227
EX_arachd(e)	100		DNDPt48m	100	5.61557e-12		ENMAN1g	99.8249	1.19593		GCCcm	95.5118	9.49467		DURAD2	98.132	6.63227
EX_arg-L(e)	100		DNDPt49m	100	5.61557e-12		ENMAN2g	99.8249	1.19593		GCHOLAt2	95.5118	9.49467		DURIK1	98.132	6.63227
EX_ascb-L(e)	100		DNDPt4m	100	5.61557e-12		ENMAN3g	99.8249	1.19593		GCHOLAtx	95.5118	9.49467		DURIK1m	98.132	6.63227
EX_asn-L(e)	100		DNDPt50m	100	5.61557e-12		ENMAN4g	99.8249	1.19593		GCNTg	95.5118	9.49467		DURItn	98.132	6.63227
EX_asp-D(e)	100		DNDPt51m	100	5.61557e-12		ENMAN5g	99.8249	1.19593		GD1B2te	95.5118	9.49467		DUTPDPm	98.132	6.63227
EX_asp-L(e)	100		DNDPt52m	100	5.61557e-12		ENMAN6g	99.8249	1.19593		GD1B2tg	95.5118	9.49467		DUTPDPn	98.132	6.63227
EX_atp(e)	100		DNDPt53m	100	5.61557e-12		ENO	99.8249	1.19593		GD1Cte	95.5118	9.49467		EAFLATOXINte	98.132	6.63227
EX_avite1(e)	100		DNDPt54m	100	5.61557e-12		ESTRADIOLGLCt	99.8249	1.19593		GD1Ctg	95.5118	9.49467		EBASTINEOHte	98.132	6.63227
EX_avite2(e)	100		DNDPt59m	100	5.61557e-12		ESTRADIOLGLCt2	99.8249	1.19593		GDCHOLAte	95.5118	9.49467		EBASTINEte	98.132	6.63227
EX_bhb(e)	100		DNDPt5m	100	5.61557e-12		ESTRADIOLGLCtr	99.8249	1.19593		GGH-10FTHF5GLUe	95.5118	9.49467		EBP1r	98.132	6.63227
EX_bildglcur(e)	100		DNDPt60m	100	5.61557e-12		ESTRADIOLt	99.8249	1.19593		GGH-10FTHF6GLUe	95.5118	9.49467		EBP2r	98.132	6.63227
EX_bilglcur(e)	100		DNDPt61m	100	5.61557e-12		ESTRADIOLtr	99.8249	1.19593		GGH-10FTHF7GLUe	95.5118	9.49467		ECOAH1m	98.132	6.63227
EX_bilirub(e)	100		DNDPt62m	100	5.61557e-12		ESTRIOLGLCte	99.8249	1.19593		GGH-5DHFe	95.5118	9.49467		ECOAH1x	98.132	6.63227
EX_biocyt(e)	100		DNDPt63m	100	5.61557e-12		ESTRIOLGLCtr	99.8249	1.19593		GGH-5THFe	95.5118	9.49467		ECOAH9m	98.132	6.63227
EX_btn(e)	100		DNDPt6m	100	5.61557e-12		ESTRONEGLCt	99.8249	1.19593		GGH-6DHFe	95.5118	9.49467		EGMESTr	98.132	6.63227
EX_but(e)	100		DNDPt7m	100	5.61557e-12		ESTRONEGLCtr	99.8249	1.19593		GGH-6THFe	95.5118	9.49467		EHGLAT	98.132	6.63227
EX_bvite(e)	100		DNDPt8m	100	5.61557e-12		ESTRONESt	99.8249	1.19593		GGH-7DHFe	95.5118	9.49467		EHGLAT2m	98.132	6.63227
EX_bz(e)	100		DNDPt9m	100	5.61557e-12		ESTRONESt2	99.8249	1.19593		GGH-7THFe	95.5118	9.49467		EHGLATm	98.132	6.63227
EX_ca2(e)	100		DOGULND1	100	5.61557e-12		ESTRONEtr	99.8249	1.19593		GGLUCT	95.5118	9.49467		EICOSTETCPT1	98.132	6.63227
EX_camp(e)	100		DOGULND2	100	5.61557e-12		ESTSULT	99.8249	1.19593		GHMT2rm	95.5118	9.49467		EICOSTETCPT2	98.132	6.63227
EX_cca_d3(e)	100		DOGULNO1	100	5.61557e-12		ETHAK	99.8249	1.19593		GHMT3	95.5118	9.49467		EICOSTETCRNt	98.132	6.63227
EX_chol(e)	100		DOGULNO2	100	5.61557e-12		ETHP	99.8249	1.19593		GHMT3m	95.5118	9.49467		EICOSTETt	98.132	6.63227
EX_cholate(e)	100		DOPABMO	100	5.96499e-12		ETOHMO	99.8249	1.19593		GLACO	95.5118	9.49467		ELAIDCPT1	98.132	6.63227
EX_chsterol(e)	100		DOPAt4(2)r	100	5.61557e-12		ETOHt	99.8249	1.19593		GLACOm	95.5118	9.49467		ELAIDCPT2	98.132	6.63227
EX_chtn(e)	100		DOPAtu	100	5.61557e-12		ETOHtx	99.8249	1.19593		GLAl	95.5118	9.49467		ELAIDCRNt	98.132	6.63227
EX_cit(e)	100		DPCOAtl	100	5.61557e-12		EX_10fthf(e)	99.8249	1.19593		GLCAASE1ly	95.5118	9.49467		ELAIDt	98.132	6.63227
EX_cl(e)	100		DPHMBDCm	100	5.61557e-12		EX_10fthf5glu(e)	99.8249	1.19593		GLCAASE4ly	95.5118	9.49467		ENGASE	98.132	6.63227
EX_CLPND(e)	100		DRPA	100	5.61557e-12		EX_10fthf6glu(e)	99.8249	1.19593		GLCAASE5ly	95.5118	9.49467		ENGASE2	98.132	6.63227
EX_cmp(e)	100		DTDPtn	100	5.61557e-12		EX_10fthf7glu(e)	99.8249	1.19593		GLCAASE6ly	95.5118	9.49467		ENGASE2ly	98.132	6.63227
EX_co(e)	100		DTTPtn	100	5.61557e-12		EX_11-cis-retfa(e)	99.8249	1.19593		GLCAASE7ly	95.5118	9.49467		ENMAN1g	98.132	6.63227
EX_co2(e)	100		DURAD	100	5.61557e-12		EX_13-cis-retnglc(e)	99.8249	1.19593		GLCAASE8ly	95.5118	9.49467		ENMAN2g	98.132	6.63227
EX_coumarin(e)	100		DURAD2	100	5.61557e-12		EX_1glyc_hs(e)	99.8249	1.19593		GLCAASE9ly	95.5118	9.49467		ENMAN3g	98.132	6.63227
EX_creat(e)	100		DURItn	100	5.61557e-12		EX_1mncam(e)	99.8249	1.19593		GLCAE2g	95.5118	9.49467		ENMAN4g	98.132	6.63227
EX_crmp_hs(e)	100		EAFLATOXINte	100	5.61557e-12		EX_2425dhvitd2(e)	99.8249	1.19593		GLCAT2g	95.5118	9.49467		ENMAN5g	98.132	6.63227
EX_crn(e)	100		EBASTINEOHte	100	5.61557e-12		EX_2425dhvitd3(e)	99.8249	1.19593		GLCAT3g	95.5118	9.49467		ENMAN6g	98.132	6.63227
EX_crtsl(e)	100		EBASTINEte	100	5.61557e-12		EX_24nph(e)	99.8249	1.19593		GLCAT4g	95.5118	9.49467		ENO	98.132	6.63227
EX_crtstrn(e)	100		ECOAH1m	100	5.61557e-12		EX_25hvitd2(e)	99.8249	1.19593		GLCAT5g	95.5118	9.49467		ESTRADIOLGLCt	98.132	6.63227
EX_crvnc(e)	100		ECOAH1x	100	5.61557e-12		EX_25hvitd3(e)	99.8249	1.19593		GLCAT6g	95.5118	9.49467		ESTRADIOLGLCt2	98.132	6.63227
EX_csn(e)	100		EGMESTr	100	5.61557e-12		EX_4hdebrisoquine(e)	99.8249	1.19593		GLCAT7g	95.5118	9.49467		ESTRADIOLGLCtr	98.132	6.63227
EX_cspg_a(e)	100		EHGLAT	100	5.61557e-12		EX_4hphac(e)	99.8249	1.19593		GLCAT8g	95.5118	9.49467		ESTRADIOLt	98.132	6.63227
EX_cspg_b(e)	100		EHGLAT2m	100	5.61557e-12		EX_4mptnl(e)	99.8249	1.19593		GLCAT9g	95.5118	9.49467		ESTRADIOLtr	98.132	6.63227
EX_cspg_c(e)	100		EHGLATm	100	5.61557e-12		EX_4nph(e)	99.8249	1.19593		GLCATg	95.5118	9.49467		ESTRIOLGLCte	98.132	6.63227
EX_cspg_d(e)	100		EICOSTETCPT1	100	5.61557e-12		EX_4nphsf(e)	99.8249	1.19593		GLCNACASE1ly	95.5118	9.49467		ESTRIOLGLCtr	98.132	6.63227
EX_cspg_e(e)	100		EICOSTETCPT2	100	5.61557e-12		EX_4pyrdx(e)	99.8249	1.19593		GLCNACASE2ly	95.5118	9.49467		ESTRONEGLCt	98.132	6.63227
EX_cyan(e)	100		EICOSTETCRNt	100	5.61557e-12		EX_5adtststerone(e)	99.8249	1.19593		GLCNACASE3ly	95.5118	9.49467		ESTRONEGLCtr	98.132	6.63227
EX_cytd(e)	100		EICOSTETt	100	5.61557e-12		EX_5adtststeroneglc(e)	99.8249	1.19593		GLCNACASE4ly	95.5118	9.49467		ESTRONESt	98.132	6.63227
EX_dad-2(e)	100		ELAIDCPT1	100	5.61557e-12		EX_5dhf(e)	99.8249	1.19593		GLCNACASE5ly	95.5118	9.49467		ESTRONESt2	98.132	6.63227
EX_dag_hs(e)	100		ELAIDCPT2	100	5.61557e-12		EX_5fthf(e)	99.8249	1.19593		GLCNACDASg	95.5118	9.49467		ESTRONEtr	98.132	6.63227
EX_dcsptn1(e)	100		ELAIDCRNt	100	5.61557e-12		EX_5mthf(e)	99.8249	1.19593		GLCNACPT_U	95.5118	9.49467		ESTSULT	98.132	6.63227
EX_dcyt(e)	100		ENGASE	100	5.61557e-12		EX_5thf(e)	99.8249	1.19593		GLCNACT_U	95.5118	9.49467		ETHAK	98.132	6.63227
EX_debrisoquine(e)	100		ENGASE2	100	5.61557e-12		EX_6dhf(e)	99.8249	1.19593		GLCNACT1g	95.5118	9.49467		ETHP	98.132	6.63227
EX_dgchol(e)	100		ENMAN1g	100	5.61557e-12		EX_6htststerone(e)	99.8249	1.19593		GLCNACT2g	95.5118	9.49467		ETOHMO	98.132	6.63227
EX_dgsn(e)	100		ENMAN2g	100	5.61557e-12		EX_6thf(e)	99.8249	1.19593		GLCNACT3g	95.5118	9.49467		ETOHt	98.132	6.63227
EX_dhdascb(e)	100		ENMAN3g	100	5.61557e-12		EX_7dhf(e)	99.8249	1.19593		GLCNACT4g	95.5118	9.49467		ETOHtx	98.132	6.63227
EX_dheas(e)	100		ENMAN4g	100	5.61557e-12		EX_7thf(e)	99.8249	1.19593		GLCNACT5g	95.5118	9.49467		EX_10fthf(e)	98.132	6.63227
EX_dhf(e)	100		ENMAN5g	100	5.61557e-12		EX_9-cis-retfa(e)	99.8249	1.19593		GLCt1r	95.5118	9.49467		EX_10fthf5glu(e)	98.132	6.63227
EX_digalsgalside_hs(e)	100		ENMAN6g	100	5.61557e-12		EX_abt(e)	99.8249	1.19593		GLCt2_2	95.5118	9.49467		EX_10fthf6glu(e)	98.132	6.63227
EX_din(e)	100		ESTRIOLGLCte	100	5.61557e-12		EX_ac(e)	99.8249	1.19593		GLCt2r	95.5118	9.49467		EX_10fthf7glu(e)	98.132	6.63227
EX_dlnlcg(e)	100		ESTRIOLGLCtr	100	5.61557e-12		EX_acac(e)	99.8249	1.19593		GLCt4	95.5118	9.49467		EX_11-cis-retfa(e)	98.132	6.63227
EX_dmhptcrn(e)	100		ESTRONESt2	100	5.61557e-12		EX_acald(e)	99.8249	1.19593		GLCt4_2	95.5118	9.49467		EX_13-cis-retnglc(e)	98.132	6.63227
EX_dopa(e)	100		ETOHMO	100	5.61557e-12		EX_acetone(e)	99.8249	1.19593		GLCtg	95.5118	9.49467		EX_1glyc_hs(e)	98.132	6.63227
EX_dopasf(e)	100		ETOHt	100	5.61557e-12		EX_acgalfucgalacgalfuc12gal14acglcgalgluside_hs(e)	99.8249	1.19593		GLCURter	95.5118	9.49467		EX_1mncam(e)	98.132	6.63227
EX_drib(e)	100		EX_10fthf(e)	100	5.61557e-12		EX_acgalfucgalacgalfucgalacglcgal14acglcgalgluside_hs(e)	99.8249	1.19593		GLCURtly	95.5118	9.49467		EX_2425dhvitd2(e)	98.132	6.63227
EX_duri(e)	100		EX_10fthf5glu(e)	100	5.61557e-12		EX_acgam(e)	99.8249	1.19593		GLDBRAN	95.5118	9.49467		EX_2425dhvitd3(e)	98.132	6.63227
EX_eaflatoxin(e)	100		EX_10fthf6glu(e)	100	5.61557e-12		EX_ach(e)	99.8249	1.19593		GLNALANaEx	95.5118	9.49467		EX_24nph(e)	98.132	6.63227
EX_ebastine(e)	100		EX_10fthf7glu(e)	100	5.61557e-12		EX_acn13acngalgbside_hs(e)	99.8249	1.19593		GLNASNNaEx	95.5118	9.49467		EX_25hvitd2(e)	98.132	6.63227
EX_ebastineoh(e)	100		EX_13-cis-retnglc(e)	100	6.09564e-12		EX_acn23acngalgbside_hs(e)	99.8249	1.19593		GLNCYSNaEx	95.5118	9.49467		EX_25hvitd3(e)	98.132	6.63227
EX_eicostet(e)	100		EX_2425dhvitd2(e)	100	5.61557e-12		EX_acnacngal14acglcgalgluside_hs(e)	99.8249	1.19593		GLNSERNaEx	95.5118	9.49467		EX_4hdebrisoquine(e)	98.132	6.63227
EX_elaid(e)	100		EX_24nph(e)	100	5.61557e-12		EX_acnacngalgbside_hs(e)	99.8249	1.19593		GLNt4	95.5118	9.49467		EX_4hphac(e)	98.132	6.63227
EX_estradiol(e)	100		EX_25hvitd2(e)	100	5.61557e-12		EX_acngalacglcgal14acglcgalgluside_hs(e)	99.8249	1.19593		GLNTHRNaEx	95.5118	9.49467		EX_4mptnl(e)	98.132	6.63227
EX_estradiolglc(e)	100		EX_4hdebrisoquine(e)	100	5.61557e-12		EX_adp	99.8249	1.19593		GLNtm	95.5118	9.49467		EX_4nph(e)	98.132	6.63227
EX_estriolglc(e)	100		EX_4mptnl(e)	100	5.61557e-12		EX_adprbp(e)	99.8249	1.19593		GLNtN1	95.5118	9.49467		EX_4nphsf(e)	98.132	6.63227
EX_estroneglc(e)	100		EX_4nph(e)	100	5.61557e-12		EX_adprib(e)	99.8249	1.19593		GLPASE1	95.5118	9.49467		EX_4pyrdx(e)	98.132	6.63227
EX_estrones(e)	100		EX_4nphsf(e)	100	5.61557e-12		EX_adrn(e)	99.8249	1.19593		GLPASE2	95.5118	9.49467		EX_5adtststerone(e)	98.132	6.63227
EX_etoh(e)	100		EX_5adtststerone(e)	100	5.61557e-12		EX_adrnl(e)	99.8249	1.19593		GLUDxm	95.5118	9.49467		EX_5adtststeroneglc(e)	98.132	6.63227
EX_fe2(e)	100		EX_5adtststeroneglc(e)	100	5.61557e-12		EX_aflatoxin(e)	99.8249	1.19593		GLUDym	95.5118	9.49467		EX_5dhf(e)	98.132	6.63227
EX_fol(e)	100		EX_5dhf(e)	100	5.61557e-12		EX_ahandrostanglc(e)	99.8249	1.19593		GLUNm	95.5118	9.49467		EX_5fthf(e)	98.132	6.63227
EX_for(e)	100		EX_5fthf(e)	100	5.61557e-12		EX_ak2lgchol_hs(e)	99.8249	1.19593		GLUt6	95.5118	9.49467		EX_5mthf(e)	98.132	6.63227
EX_fru(e)	100		EX_5thf(e)	100	5.61557e-12		EX_akg(e)	99.8249	1.19593		GLUTCOADHm	95.5118	9.49467		EX_5thf(e)	98.132	6.63227
EX_fuc-L(e)	100		EX_6dhf(e)	100	5.61557e-12		EX_ala-B(e)	99.8249	1.19593		GLUVESSEC	95.5118	9.49467		EX_6dhf(e)	98.132	6.63227
EX_fuc13galacglcgal14acglcgalgluside_hs(e)	100		EX_6htststerone(e)	100	5.61557e-12		EX_aldstrn(e)	99.8249	1.19593		GLXO1	95.5118	9.49467		EX_6htststerone(e)	98.132	6.63227
EX_fuc14galacglcgalgluside_hs(e)	100		EX_6thf(e)	100	5.61557e-12		EX_amp(e)	99.8249	1.19593		GLXtm	95.5118	9.49467		EX_6thf(e)	98.132	6.63227
EX_fucacgalfucgalacglcgalgluside_hs(e)	100		EX_7dhf(e)	100	5.61557e-12		EX_andrstrn(e)	99.8249	1.19593		GLXtp	95.5118	9.49467		EX_7dhf(e)	98.132	6.63227
EX_fucacngal14acglcgalgluside_hs(e)	100		EX_7thf(e)	100	5.61557e-12		EX_andrstrnglc(e)	99.8249	1.19593		GLYATm	95.5118	9.49467		EX_7thf(e)	98.132	6.63227
EX_fucacngalacglcgalgluside_hs(e)	100		EX_acald(e)	100	5.61557e-12		EX_aqcobal(e)	99.8249	1.19593		GLYBtm	95.5118	9.49467		EX_9-cis-retfa(e)	98.132	6.63227
EX_fucfuc12gal14acglcgalgluside_hs(e)	100		EX_acgalfucgalacgalfuc12gal14acglcgalgluside_hs(e)	100	5.61557e-12		EX_arab-L(e)	99.8249	1.19593		GLYC-St	95.5118	9.49467		EX_abt(e)	98.132	6.63227
EX_fucfuc132galacglcgal14acglcgalgluside_hs(e)	100		EX_acgalfucgalacgalfucgalacglcgal14acglcgalgluside_hs(e)	100	5.61557e-12		EX_arach(e)	99.8249	1.19593		GLYC3Ptm	95.5118	9.49467		EX_ac(e)	98.132	6.63227
EX_fucfucfucgalacglc13galacglcgal14acglcgalgluside_hs(e)	100		EX_acgam(e)	100	5.61557e-12		EX_arachd(e)	99.8249	1.19593		GLYCK2	95.5118	9.49467		EX_acac(e)	98.132	6.63227
EX_fucfucfucgalacglcgal14acglcgalgluside_hs(e)	100		EX_ach(e)	100	5.61557e-12		EX_ascb-L(e)	99.8249	1.19593		GLYCLTDy	95.5118	9.49467		EX_acald(e)	98.132	6.63227
EX_fucfucgalacglcgalgluside_hs(e)	100		EX_acn13acngalgbside_hs(e)	100	5.61557e-12		EX_asp-D(e)	99.8249	1.19593		GLYCLTtp	95.5118	9.49467		EX_acetone(e)	98.132	6.63227
EX_fucgal14acglcgalgluside_hs(e)	100		EX_acn23acngalgbside_hs(e)	100	5.61557e-12		EX_asp-L(e)	99.8249	1.19593		GLYCtm	95.5118	9.49467		EX_acgalfucgalacgalfuc12gal14acglcgalgluside_hs(e)	98.132	6.63227
EX_fucgalfucgalacglcgalgluside_hs(e)	100		EX_acnacngal14acglcgalgluside_hs(e)	100	5.61557e-12		EX_atp(e)	99.8249	1.19593		GLYKm	95.5118	9.49467		EX_acgalfucgalacgalfucgalacglcgal14acglcgalgluside_hs(e)	98.132	6.63227
EX_fucgalgbside_hs(e)	100		EX_acnacngalgbside_hs(e)	100	5.61557e-12		EX_avite1(e)	99.8249	1.19593		GLYOXm	95.5118	9.49467		EX_acgam(e)	98.132	6.63227
EX_gal(e)	100		EX_acngalacglcgal14acglcgalgluside_hs(e)	100	5.61557e-12		EX_avite2(e)	99.8249	1.19593		GLYt2r	95.5118	9.49467		EX_ach(e)	98.132	6.63227
EX_galacglcgalgbside_hs(e)	100		EX_adp	100	5.61557e-12		EX_bhb(e)	99.8249	1.19593		GLYt2rL	95.5118	9.49467		EX_acn13acngalgbside_hs(e)	98.132	6.63227
EX_galfuc12gal14acglcgalgluside_hs(e)	100		EX_adprbp(e)	100	5.61557e-12		EX_bildglcur(e)	99.8249	1.19593		GLYt4	95.5118	9.49467		EX_acn23acngalgbside_hs(e)	98.132	6.63227
EX_galfucgalacglcgal14acglcgalgluside_hs(e)	100		EX_adprib(e)	100	5.61557e-12		EX_bilglcur(e)	99.8249	1.19593		GLYt7(211)r	95.5118	9.49467		EX_acnacngal14acglcgalgluside_hs(e)	98.132	6.63227
EX_galgalfucfucgalacglcgalacglcgal14acglcgalgluside_hs(e)	100		EX_aflatoxin(e)	100	5.61557e-12		EX_bilirub(e)	99.8249	1.19593		GLYt7(311)r	95.5118	9.49467		EX_acnacngalgbside_hs(e)	98.132	6.63227
EX_galgalgalthcrm_hs(e)	100		EX_ahandrostanglc(e)	100	5.61557e-12		EX_biocyt(e)	99.8249	1.19593		GLYtp	95.5118	9.49467		EX_acngalacglcgal14acglcgalgluside_hs(e)	98.132	6.63227
EX_gam(e)	100		EX_ala-B(e)	100	5.74812e-12		EX_btn(e)	99.8249	1.19593		GLYVESSEC	95.5118	9.49467		EX_adp	98.132	6.63227
EX_gbside_hs(e)	100		EX_aldstrn(e)	100	5.61557e-12		EX_but(e)	99.8249	1.19593		GMPR	95.5118	9.49467		EX_adprbp(e)	98.132	6.63227
EX_gchola(e)	100		EX_amp(e)	100	5.61557e-12		EX_bvite(e)	99.8249	1.19593		GMPtn	95.5118	9.49467		EX_adprib(e)	98.132	6.63227
EX_gd1b2_hs(e)	100		EX_aqcobal(e)	100	5.61557e-12		EX_bz(e)	99.8249	1.19593		GNDer	95.5118	9.49467		EX_adrn(e)	98.132	6.63227
EX_gd1c_hs(e)	100		EX_arab-L(e)	100	5.61557e-12		EX_ca2(e)	99.8249	1.19593		GNMT	95.5118	9.49467		EX_adrnl(e)	98.132	6.63227
EX_gdchola(e)	100		EX_arg-L(e)	100	5.61557e-12		EX_cca_d3(e)	99.8249	1.19593		GP1CALPHAte	95.5118	9.49467		EX_aflatoxin(e)	98.132	6.63227
EX_gdp(e)	100		EX_asp-D(e)	100	5.61557e-12		EX_chol(e)	99.8249	1.19593		GP1CALPHAtg	95.5118	9.49467		EX_ahandrostanglc(e)	98.132	6.63227
EX_glc(e)	100		EX_asp-L(e)	100	5.61557e-12		EX_cholate(e)	99.8249	1.19593		GP1Cte	95.5118	9.49467		EX_ak2lgchol_hs(e)	98.132	6.63227
EX_gln-L(e)	100		EX_atp(e)	100	5.61557e-12		EX_chsterol(e)	99.8249	1.19593		GP1Ctg	95.5118	9.49467		EX_akg(e)	98.132	6.63227
EX_glu-L(e)	100		EX_avite1(e)	100	5.61557e-12		EX_chtn(e)	99.8249	1.19593		GPAMm_hs	95.5118	9.49467		EX_ala-B(e)	98.132	6.63227
EX_gluala(e)	100		EX_avite2(e)	100	5.61557e-12		EX_cit(e)	99.8249	1.19593		GPIAT	95.5118	9.49467		EX_aldstrn(e)	98.132	6.63227
EX_gly(e)	100		EX_biocyt(e)	100	5.61557e-12		EX_cl(e)	99.8249	1.19593		GPIMTer_L	95.5118	9.49467		EX_amp(e)	98.132	6.63227
EX_glyb(e)	100		EX_btn(e)	100	5.61557e-12		EX_CLPND(e)	99.8249	1.19593		GPIMTer_U	95.5118	9.49467		EX_andrstrn(e)	98.132	6.63227
EX_glyc-S(e)	100		EX_but(e)	100	5.61557e-12		EX_cmp(e)	99.8249	1.19593		GQ1BALPHAte	95.5118	9.49467		EX_andrstrnglc(e)	98.132	6.63227
EX_glyc(e)	100		EX_bvite(e)	100	5.61557e-12		EX_co(e)	99.8249	1.19593		GQ1BALPHAtg	95.5118	9.49467		EX_aqcobal(e)	98.132	6.63227
EX_glygn2(e)	100		EX_bz(e)	100	5.61557e-12		EX_co2(e)	99.8249	1.19593		GQ1Bte	95.5118	9.49467		EX_arab-L(e)	98.132	6.63227
EX_glygn4(e)	100		EX_cca_d3(e)	100	5.61557e-12		EX_coumarin(e)	99.8249	1.19593		GQ1Btg	95.5118	9.49467		EX_arach(e)	98.132	6.63227
EX_glygn5(e)	100		EX_cholate(e)	100	5.61557e-12		EX_crn(e)	99.8249	1.19593		GRTT	95.5118	9.49467		EX_arachd(e)	98.132	6.63227
EX_gmp(e)	100		EX_chtn(e)	100	5.61557e-12		EX_crtsl(e)	99.8249	1.19593		GSNt4	95.5118	9.49467		EX_ascb-L(e)	98.132	6.63227
EX_gp1c_hs(e)	100		EX_cmp(e)	100	5.61557e-12		EX_crtstrn(e)	99.8249	1.19593		GSNt5	95.5118	9.49467		EX_asp-D(e)	98.132	6.63227
EX_gp1calpha_hs(e)	100		EX_co(e)	100	5.61557e-12		EX_crvnc(e)	99.8249	1.19593		GSNtl	95.5118	9.49467		EX_asp-L(e)	98.132	6.63227
EX_gq1b_hs(e)	100		EX_coumarin(e)	100	5.61557e-12		EX_csn(e)	99.8249	1.19593		GT1Ate	95.5118	9.49467		EX_atp(e)	98.132	6.63227
EX_gq1balpha_hs(e)	100		EX_crtsl(e)	100	5.61557e-12		EX_cspg_a(e)	99.8249	1.19593		GT1Atg	95.5118	9.49467		EX_avite1(e)	98.132	6.63227
EX_gsn(e)	100		EX_crtstrn(e)	100	5.61557e-12		EX_cspg_b(e)	99.8249	1.19593		GTHDH	95.5118	9.49467		EX_avite2(e)	98.132	6.63227
EX_gt1a_hs(e)	100		EX_csn(e)	100	5.61557e-12		EX_cspg_c(e)	99.8249	1.19593		GTHO	95.5118	9.49467		EX_bhb(e)	98.132	6.63227
EX_gthox(e)	100		EX_cspg_a(e)	100	5.61557e-12		EX_cspg_d(e)	99.8249	1.19593		GTHOm	95.5118	9.49467		EX_bildglcur(e)	98.132	6.63227
EX_gthrd(e)	100		EX_cspg_b(e)	100	5.61557e-12		EX_cspg_e(e)	99.8249	1.19593		GTHPe	95.5118	9.49467		EX_bilglcur(e)	98.132	6.63227
EX_gtp(e)	100		EX_cspg_c(e)	100	5.61557e-12		EX_cyan(e)	99.8249	1.19593		GTHPm	95.5118	9.49467		EX_bilirub(e)	98.132	6.63227
EX_gua(e)	100		EX_cspg_d(e)	100	5.61557e-12		EX_dag_hs(e)	99.8249	1.19593		GTHRDt	95.5118	9.49467		EX_biocyt(e)	98.132	6.63227
EX_h(e)	100		EX_cspg_e(e)	100	5.61557e-12		EX_dcsptn1(e)	99.8249	1.19593		GTPCIn	95.5118	9.49467		EX_btn(e)	98.132	6.63227
EX_h2o(e)	100		EX_cyan(e)	100	5.61557e-12		EX_debrisoquine(e)	99.8249	1.19593		GUAPRT	95.5118	9.49467		EX_but(e)	98.132	6.63227
EX_h2o2(e)	100		EX_debrisoquine(e)	100	5.61557e-12		EX_dgchol(e)	99.8249	1.19593		GULN3D	95.5118	9.49467		EX_bvite(e)	98.132	6.63227
EX_ha_pre1(e)	100		EX_dgchol(e)	100	5.61557e-12		EX_dhdascb(e)	99.8249	1.19593		GULNter	95.5118	9.49467		EX_bz(e)	98.132	6.63227
EX_ha(e)	100		EX_dheas(e)	100	5.61557e-12		EX_dheas(e)	99.8249	1.19593		H2CO3D2m	95.5118	9.49467		EX_ca2(e)	98.132	6.63227
EX_hco3(e)	100		EX_dhf(e)	100	5.61557e-12		EX_dhf(e)	99.8249	1.19593		H2ETer	95.5118	9.49467		EX_cca_d3(e)	98.132	6.63227
EX_hcoumarin(e)	100		EX_digalsgalside_hs(e)	100	5.61557e-12		EX_digalsgalside_hs(e)	99.8249	1.19593		H2MTer_L	95.5118	9.49467		EX_cholate(e)	98.132	6.63227
EX_hdca(e)	100		EX_dlnlcg(e)	100	5.61557e-12		EX_dlnlcg(e)	99.8249	1.19593		H2MTer_U	95.5118	9.49467		EX_chsterol(e)	98.132	6.63227
EX_hdcea(e)	100		EX_dmhptcrn(e)	100	5.61557e-12		EX_dmhptcrn(e)	99.8249	1.19593		H2O2tly	95.5118	9.49467		EX_chtn(e)	98.132	6.63227
EX_hestratriol(e)	100		EX_eaflatoxin(e)	100	5.61557e-12		EX_dopa(e)	99.8249	1.19593		H2O2tn	95.5118	9.49467		EX_cit(e)	98.132	6.63227
EX_hexc(e)	100		EX_ebastine(e)	100	5.61557e-12		EX_dopasf(e)	99.8249	1.19593		H3ETer	95.5118	9.49467		EX_cl(e)	98.132	6.63227
EX_his-L(e)	100		EX_ebastineoh(e)	100	5.61557e-12		EX_drib(e)	99.8249	1.19593		H3MTer_L	95.5118	9.49467		EX_CLPND(e)	98.132	6.63227
EX_hista(e)	100		EX_eicostet(e)	100	5.61557e-12		EX_eaflatoxin(e)	99.8249	1.19593		H3MTer_U	95.5118	9.49467		EX_cmp(e)	98.132	6.63227
EX_hom-L(e)	100		EX_estriolglc(e)	100	5.61557e-12		EX_ebastine(e)	99.8249	1.19593		H4ETer	95.5118	9.49467		EX_co(e)	98.132	6.63227
EX_hpdca(e)	100		EX_etoh(e)	100	5.61557e-12		EX_ebastineoh(e)	99.8249	1.19593		H5MTer_L	95.5118	9.49467		EX_co2(e)	98.132	6.63227
EX_hspg(e)	100		EX_fe2(e)	100	5.61557e-12		EX_eicostet(e)	99.8249	1.19593		H5MTer_U	95.5118	9.49467		EX_coumarin(e)	98.132	6.63227
EX_hxan(e)	100		EX_fol(e)	100	5.61557e-12		EX_elaid(e)	99.8249	1.19593		H6'ET2er	95.5118	9.49467		EX_crn(e)	98.132	6.63227
EX_i(e)	100		EX_fuc13galacglcgal14acglcgalgluside_hs(e)	100	5.61557e-12		EX_estradiol(e)	99.8249	1.19593		H6'ETer	95.5118	9.49467		EX_crtsl(e)	98.132	6.63227
EX_idp(e)	100		EX_fuc14galacglcgalgluside_hs(e)	100	5.61557e-12		EX_estradiolglc(e)	99.8249	1.19593		H6MTer_L	95.5118	9.49467		EX_crtstrn(e)	98.132	6.63227
EX_imp(e)	100		EX_fucacgalfucgalacglcgalgluside_hs(e)	100	5.61557e-12		EX_estriolglc(e)	99.8249	1.19593		H6MTer_U	95.5118	9.49467		EX_crvnc(e)	98.132	6.63227
EX_inost(e)	100		EX_fucacngal14acglcgalgluside_hs(e)	100	5.61557e-12		EX_estroneglc(e)	99.8249	1.19593		H7'ETer	95.5118	9.49467		EX_csn(e)	98.132	6.63227
EX_ins(e)	100		EX_fucacngalacglcgalgluside_hs(e)	100	5.61557e-12		EX_estrones(e)	99.8249	1.19593		H7'TAer	95.5118	9.49467		EX_cspg_a(e)	98.132	6.63227
EX_k(e)	100		EX_fucfuc12gal14acglcgalgluside_hs(e)	100	5.61557e-12		EX_etoh(e)	99.8249	1.19593		H7ET2er	95.5118	9.49467		EX_cspg_b(e)	98.132	6.63227
EX_ksi_deg1(e)	100		EX_fucfuc132galacglcgal14acglcgalgluside_hs(e)	100	5.61557e-12		EX_fe2(e)	99.8249	1.19593		H7MTer_L	95.5118	9.49467		EX_cspg_c(e)	98.132	6.63227
EX_ksi(e)	100		EX_fucfucfucgalacglc13galacglcgal14acglcgalgluside_hs(e)	100	5.61557e-12		EX_fol(e)	99.8249	1.19593		H7MTer_U	95.5118	9.49467		EX_cspg_d(e)	98.132	6.63227
EX_ksii_core2(e)	100		EX_fucfucfucgalacglcgal14acglcgalgluside_hs(e)	100	5.61557e-12		EX_for(e)	99.8249	1.19593		H8MTer_L	95.5118	9.49467		EX_cspg_e(e)	98.132	6.63227
EX_ksii_core4(e)	100		EX_fucfucgalacglcgalgluside_hs(e)	100	5.61557e-12		EX_fru(e)	99.8249	1.19593		H8MTer_U	95.5118	9.49467		EX_cyan(e)	98.132	6.63227
EX_lac-D(e)	100		EX_fucgal14acglcgalgluside_hs(e)	100	5.61557e-12		EX_fuc-L(e)	99.8249	1.19593		H8TAer	95.5118	9.49467		EX_dag_hs(e)	98.132	6.63227
EX_lac-L(e)	100		EX_fucgalfucgalacglcgalgluside_hs(e)	100	5.61557e-12		EX_fuc13galacglcgal14acglcgalgluside_hs(e)	99.8249	1.19593		HACD1m	95.5118	9.49467		EX_dcsptn1(e)	98.132	6.63227
EX_lcts(e)	100		EX_fucgalgbside_hs(e)	100	5.61557e-12		EX_fuc14galacglcgalgluside_hs(e)	99.8249	1.19593		HACD1x	95.5118	9.49467		EX_debrisoquine(e)	98.132	6.63227
EX_Lcystin(e)	100		EX_galacglcgalgbside_hs(e)	100	5.61557e-12		EX_fucacgalfucgalacglcgalgluside_hs(e)	99.8249	1.19593		HACD9m	95.5118	9.49467		EX_dgchol(e)	98.132	6.63227
EX_leu-L(e)	100		EX_galfuc12gal14acglcgalgluside_hs(e)	100	5.61557e-12		EX_fucacngal14acglcgalgluside_hs(e)	99.8249	1.19593		HAS1	95.5118	9.49467		EX_dhdascb(e)	98.132	6.63227
EX_leuktrA4(e)	100		EX_galfucgalacglcgal14acglcgalgluside_hs(e)	100	5.61557e-12		EX_fucacngalacglcgalgluside_hs(e)	99.8249	1.19593		HAS2	95.5118	9.49467		EX_dheas(e)	98.132	6.63227
EX_leuktrB4(e)	100		EX_galgalfucfucgalacglcgalacglcgal14acglcgalgluside_hs(e)	100	5.61557e-12		EX_fucfuc12gal14acglcgalgluside_hs(e)	99.8249	1.19593		HAtly	95.5118	9.49467		EX_dhf(e)	98.132	6.63227
EX_leuktrC4(e)	100		EX_galgalgalthcrm_hs(e)	100	5.61557e-12		EX_fucfuc132galacglcgal14acglcgalgluside_hs(e)	99.8249	1.19593		HBZOPT10m	95.5118	9.49467		EX_digalsgalside_hs(e)	98.132	6.63227
EX_leuktrD4(e)	100		EX_gam(e)	100	5.61557e-12		EX_fucfucfucgalacglc13galacglcgal14acglcgalgluside_hs(e)	99.8249	1.19593		HCOUMARINte	95.5118	9.49467		EX_dlnlcg(e)	98.132	6.63227
EX_leuktrE4(e)	100		EX_gd1b2_hs(e)	100	5.61557e-12		EX_fucfucfucgalacglcgal14acglcgalgluside_hs(e)	99.8249	1.19593		HDCAtr	95.5118	9.49467		EX_dmhptcrn(e)	98.132	6.63227
EX_leuktrF4(e)	100		EX_gd1c_hs(e)	100	5.61557e-12		EX_fucfucgalacglcgalgluside_hs(e)	99.8249	1.19593		HEX10	95.5118	9.49467		EX_dopa(e)	98.132	6.63227
EX_lgnc(e)	100		EX_gdchola(e)	100	5.61557e-12		EX_fucgal14acglcgalgluside_hs(e)	99.8249	1.19593		HEX7	95.5118	9.49467		EX_dopasf(e)	98.132	6.63227
EX_lipoate(e)	100		EX_gdp(e)	100	5.61557e-12		EX_fucgalfucgalacglcgalgluside_hs(e)	99.8249	1.19593		HEXCCPT1	95.5118	9.49467		EX_drib(e)	98.132	6.63227
EX_lneldc(e)	100		EX_glyc-S(e)	100	5.61557e-12		EX_fucgalgbside_hs(e)	99.8249	1.19593		HEXCCPT2	95.5118	9.49467		EX_eaflatoxin(e)	98.132	6.63227
EX_lnlc(e)	100		EX_glygn2(e)	100	5.61557e-12		EX_gal(e)	99.8249	1.19593		HEXCCRNt	95.5118	9.49467		EX_ebastine(e)	98.132	6.63227
EX_lnlnca(e)	100		EX_glygn4(e)	100	5.61557e-12		EX_galacglcgalgbside_hs(e)	99.8249	1.19593		HISt4	95.5118	9.49467		EX_ebastineoh(e)	98.132	6.63227
EX_lnlncg(e)	100		EX_glygn5(e)	100	5.61557e-12		EX_galfuc12gal14acglcgalgluside_hs(e)	99.8249	1.19593		HISTASE	95.5118	9.49467		EX_eicostet(e)	98.132	6.63227
EX_lpchol_hs(e)	100		EX_gmp(e)	100	5.61557e-12		EX_galfucgalacglcgal14acglcgalgluside_hs(e)	99.8249	1.19593		HIStiDF	95.5118	9.49467		EX_elaid(e)	98.132	6.63227
EX_mag_hs(e)	100		EX_gp1c_hs(e)	100	5.61557e-12		EX_galgalfucfucgalacglcgalacglcgal14acglcgalgluside_hs(e)	99.8249	1.19593		HKt	95.5118	9.49467		EX_estradiol(e)	98.132	6.63227
EX_malt(e)	100		EX_gp1calpha_hs(e)	100	5.61557e-12		EX_galgalgalthcrm_hs(e)	99.8249	1.19593		HKYNH	95.5118	9.49467		EX_estradiolglc(e)	98.132	6.63227
EX_man(e)	100		EX_gq1b_hs(e)	100	5.61557e-12		EX_gam(e)	99.8249	1.19593		HMBS	95.5118	9.49467		EX_estriolglc(e)	98.132	6.63227
EX_meoh(e)	100		EX_gq1balpha_hs(e)	100	5.61557e-12		EX_gbside_hs(e)	99.8249	1.19593		HMGCOARr	95.5118	9.49467		EX_estroneglc(e)	98.132	6.63227
EX_mepi(e)	100		EX_gt1a_hs(e)	100	5.61557e-12		EX_gchola(e)	99.8249	1.19593		HMGCOASi	95.5118	9.49467		EX_estrones(e)	98.132	6.63227
EX_mthgxl(e)	100		EX_gthox(e)	100	5.61557e-12		EX_gd1b2_hs(e)	99.8249	1.19593		HMGCOASim	95.5118	9.49467		EX_etoh(e)	98.132	6.63227
EX_n2m2nmasn(e)	100		EX_gthrd(e)	100	5.61557e-12		EX_gd1c_hs(e)	99.8249	1.19593		HMGLm	95.5118	9.49467		EX_fe2(e)	98.132	6.63227
EX_na1(e)	100		EX_gtp(e)	100	5.61557e-12		EX_gdchola(e)	99.8249	1.19593		HMGLx	95.5118	9.49467		EX_fol(e)	98.132	6.63227
EX_nac(e)	100		EX_hcoumarin(e)	100	5.61557e-12		EX_gdp(e)	99.8249	1.19593		HOMt4	95.5118	9.49467		EX_for(e)	98.132	6.63227
EX_nad(e)	100		EX_hom-L(e)	100	5.61557e-12		EX_glc(e)	99.8249	1.19593		HOXG	95.5118	9.49467		EX_fru(e)	98.132	6.63227
EX_nadp(e)	100		EX_hpdca(e)	100	5.61557e-12		EX_glyb(e)	99.8249	1.19593		HPDCACRNCPT1	95.5118	9.49467		EX_fuc-L(e)	98.132	6.63227
EX_ncam(e)	100		EX_hspg(e)	100	5.61557e-12		EX_glyc-S(e)	99.8249	1.19593		HPDCACRNCPT2	95.5118	9.49467		EX_fuc13galacglcgal14acglcgalgluside_hs(e)	98.132	6.63227
EX_nh4(e)	100		EX_idp(e)	100	5.61557e-12		EX_glyc(e)	99.8249	1.19593		HPDCACRNt	95.5118	9.49467		EX_fuc14galacglcgalgluside_hs(e)	98.132	6.63227
EX_no(e)	100		EX_imp(e)	100	5.61557e-12		EX_glygn2(e)	99.8249	1.19593		HPDCAt	95.5118	9.49467		EX_fucacgalfucgalacglcgalgluside_hs(e)	98.132	6.63227
EX_npthl(e)	100		EX_ksii_core4(e)	100	5.61557e-12		EX_glygn4(e)	99.8249	1.19593		HPROxm	95.5118	9.49467		EX_fucacngal14acglcgalgluside_hs(e)	98.132	6.63227
EX_nrpphr(e)	100		EX_Lcystin(e)	100	5.61557e-12		EX_glygn5(e)	99.8249	1.19593		HPYRR2x	95.5118	9.49467		EX_fucacngalacglcgalgluside_hs(e)	98.132	6.63227
EX_nrpphrsf(e)	100		EX_lipoate(e)	100	5.61557e-12		EX_gmp(e)	99.8249	1.19593		HPYRRy	95.5118	9.49467		EX_fucfuc12gal14acglcgalgluside_hs(e)	98.132	6.63227
EX_nrvnc(e)	100		EX_lnlc(e)	100	5.61557e-12		EX_gp1c_hs(e)	99.8249	1.19593		HPYRtp	95.5118	9.49467		EX_fucfuc132galacglcgal14acglcgalgluside_hs(e)	98.132	6.63227
EX_o2(e)	100		EX_lnlnca(e)	100	5.61557e-12		EX_gp1calpha_hs(e)	99.8249	1.19593		HS1ly	95.5118	9.49467		EX_fucfucfucgalacglc13galacglcgal14acglcgalgluside_hs(e)	98.132	6.63227
EX_o2s(e)	100		EX_lnlncg(e)	100	5.61557e-12		EX_gq1b_hs(e)	99.8249	1.19593		HS2ly	95.5118	9.49467		EX_fucfucfucgalacglcgal14acglcgalgluside_hs(e)	98.132	6.63227
EX_oagd3_hs(e)	100		EX_malt(e)	100	5.61557e-12		EX_gq1balpha_hs(e)	99.8249	1.19593		HS3ly	95.5118	9.49467		EX_fucfucgalacglcgalgluside_hs(e)	98.132	6.63227
EX_oagt3_hs(e)	100		EX_nac(e)	100	5.61557e-12		EX_gt1a_hs(e)	99.8249	1.19593		HS4ly	95.5118	9.49467		EX_fucgal14acglcgalgluside_hs(e)	98.132	6.63227
EX_ocdca(e)	100		EX_nad(e)	100	5.61557e-12		EX_gthox(e)	99.8249	1.19593		HSAT1ly	95.5118	9.49467		EX_fucgalfucgalacglcgalgluside_hs(e)	98.132	6.63227
EX_ocdcea(e)	100		EX_nadp(e)	100	5.61557e-12		EX_gthrd(e)	99.8249	1.19593		HSAT2ly	95.5118	9.49467		EX_fucgalgbside_hs(e)	98.132	6.63227
EX_octa(e)	100		EX_ncam(e)	100	5.61557e-12		EX_gtp(e)	99.8249	1.19593		HSAT3ly	95.5118	9.49467		EX_gal(e)	98.132	6.63227
EX_oh1	100		EX_npthl(e)	100	5.61557e-12		EX_h(e)	99.8249	1.19593		HSAT4ly	95.5118	9.49467		EX_galacglcgalgbside_hs(e)	98.132	6.63227
EX_onpthl(e)	100		EX_oagd3_hs(e)	100	5.61557e-12		EX_h2o(e)	99.8249	1.19593		HSD17B2r	95.5118	9.49467		EX_galfuc12gal14acglcgalgluside_hs(e)	98.132	6.63227
EX_orn(e)	100		EX_octa(e)	100	5.61557e-12		EX_h2o2(e)	99.8249	1.19593		HSD17B3r	95.5118	9.49467		EX_galfucgalacglcgal14acglcgalgluside_hs(e)	98.132	6.63227
EX_oxa(e)	100		EX_onpthl(e)	100	5.61557e-12		EX_ha_pre1(e)	99.8249	1.19593		HSD17B42x	95.5118	9.49467		EX_galgalfucfucgalacglcgalacglcgal14acglcgalgluside_hs(e)	98.132	6.63227
EX_paf_hs(e)	100		EX_orn(e)	100	5.61557e-12		EX_ha(e)	99.8249	1.19593		HSD17B4x	95.5118	9.49467		EX_galgalgalthcrm_hs(e)	98.132	6.63227
EX_pchol_hs(e)	100		EX_paf_hs(e)	100	5.85501e-12		EX_hco3(e)	99.8249	1.19593		HSD3A1r	95.5118	9.49467		EX_gam(e)	98.132	6.63227
EX_pe_hs(e)	100		EX_pchol_hs(e)	100	6.08722e-12		EX_hcoumarin(e)	99.8249	1.19593		HSD3A2r	95.5118	9.49467		EX_gbside_hs(e)	98.132	6.63227
EX_peplys(e)	100		EX_peplys(e)	100	5.61557e-12		EX_hdca(e)	99.8249	1.19593		HSD3B11r	95.5118	9.49467		EX_gchola(e)	98.132	6.63227
EX_pglyc_hs(e)	100		EX_pheme(e)	100	5.61557e-12		EX_hdcea(e)	99.8249	1.19593		HSD3B12r	95.5118	9.49467		EX_gd1b2_hs(e)	98.132	6.63227
EX_phe-L(e)	100		EX_phyQ(e)	100	5.61557e-12		EX_hestratriol(e)	99.8249	1.19593		HSD3B13	95.5118	9.49467		EX_gd1c_hs(e)	98.132	6.63227
EX_pheme(e)	100		EX_phyt(e)	100	5.61557e-12		EX_hexc(e)	99.8249	1.19593		HSD3B13r	95.5118	9.49467		EX_gdchola(e)	98.132	6.63227
EX_phyQ(e)	100		EX_pnto-R(e)	100	5.61557e-12		EX_hom-L(e)	99.8249	1.19593		HSD3B2r	95.5118	9.49467		EX_gdp(e)	98.132	6.63227
EX_phyt(e)	100		EX_ppa(e)	100	5.61557e-12		EX_hpdca(e)	99.8249	1.19593		HSD3B3r	95.5118	9.49467		EX_glc(e)	98.132	6.63227
EX_pnto-R(e)	100		EX_pro-D(e)	100	5.61557e-12		EX_hspg(e)	99.8249	1.19593		HSD3B7	95.5118	9.49467		EX_glyb(e)	98.132	6.63227
EX_ppa(e)	100		EX_prostge1(e)	100	5.61557e-12		EX_i(e)	99.8249	1.19593		HSD3B7P	95.5118	9.49467		EX_glyc-S(e)	98.132	6.63227
EX_prgstrn(e)	100		EX_ptdca(e)	100	5.61557e-12		EX_idp(e)	99.8249	1.19593		HSPASEly	95.5118	9.49467		EX_glyc(e)	98.132	6.63227
EX_pro-D(e)	100		EX_retnglc(e)	100	6.09564e-12		EX_imp(e)	99.8249	1.19593		HSPGt	95.5118	9.49467		EX_glygn2(e)	98.132	6.63227
EX_pro-L(e)	100		EX_retpalm(e)	100	5.61557e-12		EX_inost(e)	99.8249	1.19593		HSPGtly	95.5118	9.49467		EX_glygn4(e)	98.132	6.63227
EX_prostgd2(e)	100		EX_rib-D(e)	100	5.61557e-12		EX_k(e)	99.8249	1.19593		HXANtl	95.5118	9.49467		EX_glygn5(e)	98.132	6.63227
EX_prostge1(e)	100		EX_ribflv(e)	100	5.61557e-12		EX_ksi_deg1(e)	99.8249	1.19593		HXANtx	95.5118	9.49467		EX_gmp(e)	98.132	6.63227
EX_prostge2(e)	100		EX_sarcs(e)	100	5.61557e-12		EX_ksi(e)	99.8249	1.19593		HXPRT	95.5118	9.49467		EX_gp1c_hs(e)	98.132	6.63227
EX_prostgf2(e)	100		EX_sel(e)	100	5.61557e-12		EX_ksii_core2(e)	99.8249	1.19593		HYPOE	95.5118	9.49467		EX_gp1calpha_hs(e)	98.132	6.63227
EX_ps_hs(e)	100		EX_ser-D(e)	100	5.61557e-12		EX_ksii_core4(e)	99.8249	1.19593		ICDHxm	95.5118	9.49467		EX_gq1b_hs(e)	98.132	6.63227
EX_ptdca(e)	100		EX_sl-L(e)	100	5.61557e-12		EX_lac-D(e)	99.8249	1.19593		ICDHy	95.5118	9.49467		EX_gq1balpha_hs(e)	98.132	6.63227
EX_pydam(e)	100		EX_sph1p(e)	100	6.08812e-12		EX_lac-L(e)	99.8249	1.19593		ICDHyp	95.5118	9.49467		EX_gt1a_hs(e)	98.132	6.63227
EX_pydx(e)	100		EX_strch1(e)	100	5.61557e-12		EX_lcts(e)	99.8249	1.19593		IDOAASE1ly	95.5118	9.49467		EX_gthox(e)	98.132	6.63227
EX_pydxn(e)	100		EX_strch2(e)	100	5.61557e-12		EX_Lcystin(e)	99.8249	1.19593		IDOAASE2ly	95.5118	9.49467		EX_gthrd(e)	98.132	6.63227
EX_pyr(e)	100		EX_strdnc(e)	100	5.61557e-12		EX_leu-L(e)	99.8249	1.19593		IDOAASE3ly	95.5118	9.49467		EX_gtp(e)	98.132	6.63227
EX_retfa(e)	100		EX_tagat-D(e)	100	5.61557e-12		EX_leuktrA4(e)	99.8249	1.19593		IDOAASE4ly	95.5118	9.49467		EX_h(e)	98.132	6.63227
EX_retinol-9-cis(e)	100		EX_tdchola(e)	100	5.61557e-12		EX_leuktrB4(e)	99.8249	1.19593		IDOURtly	95.5118	9.49467		EX_h2o(e)	98.132	6.63227
EX_retinol-cis-11(e)	100		EX_thymd(e)	100	5.61557e-12		EX_leuktrC4(e)	99.8249	1.19593		ILEt4	95.5118	9.49467		EX_h2o2(e)	98.132	6.63227
EX_retinol(e)	100		EX_thyox-L(e)	100	5.61557e-12		EX_leuktrD4(e)	99.8249	1.19593		IMACTD	95.5118	9.49467		EX_hco3(e)	98.132	6.63227
EX_retn(e)	100		EX_tre(e)	100	5.61557e-12		EX_leuktrE4(e)	99.8249	1.19593		IMACTD_m	95.5118	9.49467		EX_hcoumarin(e)	98.132	6.63227
EX_retnglc(e)	100		EX_triodthy(e)	100	5.61557e-12		EX_leuktrF4(e)	99.8249	1.19593		INSt4	95.5118	9.49467		EX_hdca(e)	98.132	6.63227
EX_retpalm(e)	100		EX_triodthysuf(e)	100	5.74812e-12		EX_lgnc(e)	99.8249	1.19593		INSt5	95.5118	9.49467		EX_hdcea(e)	98.132	6.63227
EX_rib-D(e)	100		EX_tststerone(e)	100	5.61557e-12		EX_lipoate(e)	99.8249	1.19593		INStl	95.5118	9.49467		EX_hestratriol(e)	98.132	6.63227
EX_ribflv(e)	100		EX_tststeroneglc(e)	100	5.61557e-12		EX_lneldc(e)	99.8249	1.19593		INStm	95.5118	9.49467		EX_hexc(e)	98.132	6.63227
EX_Rtotal(e)	100		EX_Tyr-ggn(e)	100	5.61557e-12		EX_lnlc(e)	99.8249	1.19593		INSTt2r	95.5118	9.49467		EX_hom-L(e)	98.132	6.63227
EX_Rtotal2(e)	100		EX_udp(e)	100	5.61557e-12		EX_lnlnca(e)	99.8249	1.19593		INSTt4	95.5118	9.49467		EX_hpdca(e)	98.132	6.63227
EX_Rtotal3(e)	100		EX_ump(e)	100	5.61557e-12		EX_lnlncg(e)	99.8249	1.19593		INSTt4_2	95.5118	9.49467		EX_hspg(e)	98.132	6.63227
EX_s2l2fn2m2masn(e)	100		EX_urate(e)	100	5.61557e-12		EX_lpchol_hs(e)	99.8249	1.19593		IPDPtr	95.5118	9.49467		EX_i(e)	98.132	6.63227
EX_s2l2n2m2masn(e)	100		EX_utp(e)	100	5.61557e-12		EX_mag_hs(e)	99.8249	1.19593		It	95.5118	9.49467		EX_idp(e)	98.132	6.63227
EX_sarcs(e)	100		EX_vitd2(e)	100	5.61557e-12		EX_malt(e)	99.8249	1.19593		ITCOAL1m	95.5118	9.49467		EX_imp(e)	98.132	6.63227
EX_sel(e)	100		EX_xoltri24(e)	100	5.61557e-12		EX_man(e)	99.8249	1.19593		ITCOALm	95.5118	9.49467		EX_inost(e)	98.132	6.63227
EX_ser-D(e)	100		EX_xoltri25(e)	100	5.61557e-12		EX_meoh(e)	99.8249	1.19593		KCCt	95.5118	9.49467		EX_k(e)	98.132	6.63227
EX_ser-L(e)	100		EX_yvite(e)	100	5.61557e-12		EX_mepi(e)	99.8249	1.19593		KDNH	95.5118	9.49467		EX_ksi_deg1(e)	98.132	6.63227
EX_sl-L(e)	100		F1Atg	100	5.61557e-12		EX_mthgxl(e)	99.8249	1.19593		KHK2	95.5118	9.49467		EX_ksi(e)	98.132	6.63227
EX_so4(e)	100		F1PGT	100	5.61557e-12		EX_n2m2nmasn(e)	99.8249	1.19593		KHK3	95.5118	9.49467		EX_ksii_core2(e)	98.132	6.63227
EX_spc_hs(e)	100		FACOAL140i	100	6.19304e-12		EX_na1(e)	99.8249	1.19593		KSII_CORE2t	95.5118	9.49467		EX_ksii_core4(e)	98.132	6.63227
EX_sph1p(e)	100		FACOAL150	100	5.61557e-12		EX_nac(e)	99.8249	1.19593		KSII_CORE2tly	95.5118	9.49467		EX_lac-D(e)	98.132	6.63227
EX_sphs1p(e)	100		FACOAL170	100	5.61557e-12		EX_nad(e)	99.8249	1.19593		KSII_CORE4t	95.5118	9.49467		EX_lac-L(e)	98.132	6.63227
EX_srtn(e)	100		FACOAL1821	100	5.61557e-12		EX_nadp(e)	99.8249	1.19593		KSII_CORE4tly	95.5118	9.49467		EX_lcts(e)	98.132	6.63227
EX_strch1(e)	100		FACOAL1831	100	5.61557e-12		EX_ncam(e)	99.8249	1.19593		KSItly	95.5118	9.49467		EX_Lcystin(e)	98.132	6.63227
EX_strch2(e)	100		FACOAL1832	100	5.61557e-12		EX_no(e)	99.8249	1.19593		Kt3g	95.5118	9.49467		EX_leu-L(e)	98.132	6.63227
EX_strdnc(e)	100		FACOAL184	100	5.61557e-12		EX_npthl(e)	99.8249	1.19593		KYN	95.5118	9.49467		EX_leuktrA4(e)	98.132	6.63227
EX_succ(e)	100		FACOAL203	100	5.61557e-12		EX_nrpphr(e)	99.8249	1.19593		KYN3OX	95.5118	9.49467		EX_leuktrB4(e)	98.132	6.63227
EX_tag_hs(e)	100		FACOAL2042	100	5.61557e-12		EX_nrpphrsf(e)	99.8249	1.19593		KYNAKGAT	95.5118	9.49467		EX_leuktrC4(e)	98.132	6.63227
EX_tagat-D(e)	100		FACOAL204i	100	5.61557e-12		EX_nrvnc(e)	99.8249	1.19593		L-LACDcm	95.5118	9.49467		EX_leuktrD4(e)	98.132	6.63227
EX_tchola(e)	100		FACOAL206	100	5.61557e-12		EX_o2(e)	99.8249	1.19593		L-LACt2r	95.5118	9.49467		EX_leuktrE4(e)	98.132	6.63227
EX_tcynt(e)	100		FACOAL226i	100	5.61557e-12		EX_o2s(e)	99.8249	1.19593		L-LACt4r	95.5118	9.49467		EX_leuktrF4(e)	98.132	6.63227
EX_tdchola(e)	100		FACOAL80i	100	5.61557e-12		EX_oagd3_hs(e)	99.8249	1.19593		L-LACtcm	95.5118	9.49467		EX_lgnc(e)	98.132	6.63227
EX_tethex3(e)	100		FADH2tx	100	5.61557e-12		EX_oagt3_hs(e)	99.8249	1.19593		L-LACtm	95.5118	9.49467		EX_lipoate(e)	98.132	6.63227
EX_tetpent3(e)	100		FADtx	100	5.61557e-12		EX_ocdca(e)	99.8249	1.19593		LACZly	95.5118	9.49467		EX_lneldc(e)	98.132	6.63227
EX_tetpent6(e)	100		FALDtm	100	5.61557e-12		EX_ocdcea(e)	99.8249	1.19593		LALDO2	95.5118	9.49467		EX_lnlc(e)	98.132	6.63227
EX_tettet6(e)	100		FAOXC11	100	5.61557e-12		EX_octa(e)	99.8249	1.19593		LAPCOAl	95.5118	9.49467		EX_lnlnca(e)	98.132	6.63227
EX_thf(e)	100		FAOXC140	100	5.61557e-12		EX_oh1	99.8249	1.19593		LCADi	95.5118	9.49467		EX_lnlncg(e)	98.132	6.63227
EX_thm(e)	100		FAOXC150m	100	5.61557e-12		EX_onpthl(e)	99.8249	1.19593		LCADi_D	95.5118	9.49467		EX_lpchol_hs(e)	98.132	6.63227
EX_thmmp(e)	100		FAOXC161802m	100	5.61557e-12		EX_orn(e)	99.8249	1.19593		LCADi_Dm	95.5118	9.49467		EX_mag_hs(e)	98.132	6.63227
EX_thmtp(e)	100		FAOXC16180m	100	5.61557e-12		EX_oxa(e)	99.8249	1.19593		LCADim	95.5118	9.49467		EX_malt(e)	98.132	6.63227
EX_thym(e)	100		FAOXC170m	100	5.61557e-12		EX_paf_hs(e)	99.8249	1.19593		LCTStg	95.5118	9.49467		EX_man(e)	98.132	6.63227
EX_thymd(e)	100		FAOXC1811601m	100	5.61557e-12		EX_pchol_hs(e)	99.8249	1.19593		LCYSTAT	95.5118	9.49467		EX_meoh(e)	98.132	6.63227
EX_thyox-L(e)	100		FAOXC1811602m	100	5.61557e-12		EX_pe_hs(e)	99.8249	1.19593		LCYSTATm	95.5118	9.49467		EX_mepi(e)	98.132	6.63227
EX_tmndnc(e)	100		FAOXC182806m	100	5.61557e-12		EX_peplys(e)	99.8249	1.19593		LDH_Lm	95.5118	9.49467		EX_mthgxl(e)	98.132	6.63227
EX_tre(e)	100		FAOXC18280m	100	5.61557e-12		EX_pglyc_hs(e)	99.8249	1.19593		LEUKTRA4t	95.5118	9.49467		EX_n2m2nmasn(e)	98.132	6.63227
EX_triodthy(e)	100		FAOXC183803m	100	5.61557e-12		EX_phe-L(e)	99.8249	1.19593		LEUKTRB4t	95.5118	9.49467		EX_na1(e)	98.132	6.63227
EX_triodthysuf(e)	100		FAOXC2031836m	100	5.61557e-12		EX_pheme(e)	99.8249	1.19593		LEUKTRB4tr	95.5118	9.49467		EX_nac(e)	98.132	6.63227
EX_trp-L(e)	100		FAOXC204184m	100	5.61557e-12		EX_phyQ(e)	99.8249	1.19593		LEUt4	95.5118	9.49467		EX_nad(e)	98.132	6.63227
EX_tststerone(e)	100		FATP1t	100	5.61557e-12		EX_phyt(e)	99.8249	1.19593		LFORKYNHYD	95.5118	9.49467		EX_nadp(e)	98.132	6.63227
EX_tststeroneglc(e)	100		FATP4t	100	5.61557e-12		EX_pnto-R(e)	99.8249	1.19593		LGNCCOAtx	95.5118	9.49467		EX_ncam(e)	98.132	6.63227
EX_tsul(e)	100		FATP5t	100	5.61557e-12		EX_ppa(e)	99.8249	1.19593		LGNCCPT1	95.5118	9.49467		EX_npthl(e)	98.132	6.63227
EX_ttdca(e)	100		FATP6t	100	5.61557e-12		EX_prgstrn(e)	99.8249	1.19593		LGNCCPT2	95.5118	9.49467		EX_nrpphr(e)	98.132	6.63227
EX_txa2(e)	100		FATP7t	100	5.61557e-12		EX_pro-D(e)	99.8249	1.19593		LGNCCRNt	95.5118	9.49467		EX_nrpphrsf(e)	98.132	6.63227
EX_tymsf(e)	100		FATP8t	100	5.61557e-12		EX_prostgd2(e)	99.8249	1.19593		LGNCt	95.5118	9.49467		EX_nrvnc(e)	98.132	6.63227
EX_Tyr-ggn(e)	100		FATP9t	100	5.61557e-12		EX_prostge1(e)	99.8249	1.19593		LINKDEG1ly	95.5118	9.49467		EX_o2(e)	98.132	6.63227
EX_tyr-L(e)	100		FBA4	100	5.61557e-12		EX_prostge2(e)	99.8249	1.19593		LIPOti	95.5118	9.49467		EX_o2s(e)	98.132	6.63227
EX_udp(e)	100		FCLTm	100	5.61557e-12		EX_prostgf2(e)	99.8249	1.19593		LNELDCCPT1	95.5118	9.49467		EX_oagd3_hs(e)	98.132	6.63227
EX_ump(e)	100		FE2t	100	5.61557e-12		EX_ps_hs(e)	99.8249	1.19593		LNELDCCPT2	95.5118	9.49467		EX_oagt3_hs(e)	98.132	6.63227
EX_ura(e)	100		FE2tm	100	5.61557e-12		EX_ptdca(e)	99.8249	1.19593		LNELDCCRNt	95.5118	9.49467		EX_ocdca(e)	98.132	6.63227
EX_urate(e)	100		FK	100	5.61557e-12		EX_pydam(e)	99.8249	1.19593		LNLCCPT1	95.5118	9.49467		EX_ocdcea(e)	98.132	6.63227
EX_urea(e)	100		FOLR2	100	5.61557e-12		EX_pydx(e)	99.8249	1.19593		LNLCCPT2	95.5118	9.49467		EX_octa(e)	98.132	6.63227
EX_uri(e)	100		FOLt2	100	5.61557e-12		EX_pydxn(e)	99.8249	1.19593		LNLCCRNt	95.5118	9.49467		EX_oh1	98.132	6.63227
EX_utp(e)	100		FORtrn	100	5.61557e-12		EX_pyr(e)	99.8249	1.19593		LNLCt	95.5118	9.49467		EX_onpthl(e)	98.132	6.63227
EX_vacc(e)	100		FRTT	100	5.61557e-12		EX_retfa(e)	99.8249	1.19593		LNLNCACPT1	95.5118	9.49467		EX_orn(e)	98.132	6.63227
EX_vitd2(e)	100		FRUt1r	100	5.61557e-12		EX_retinol-9-cis(e)	99.8249	1.19593		LNLNCACPT2	95.5118	9.49467		EX_oxa(e)	98.132	6.63227
EX_vitd3(e)	100		FRUt4	100	5.61557e-12		EX_retinol-cis-11(e)	99.8249	1.19593		LNLNCACRNt	95.5118	9.49467		EX_paf_hs(e)	98.132	6.63227
EX_xolest_hs(e)	100		FTHFCL	100	5.61557e-12		EX_retinol(e)	99.8249	1.19593		LNLNCAt	95.5118	9.49467		EX_pchol_hs(e)	98.132	6.63227
EX_xoltri24(e)	100		FUC13GALACGLCGAL14ACGLCGALGLUSIDEte	100	5.61557e-12		EX_retn(e)	99.8249	1.19593		LNLNCGCPT1	95.5118	9.49467		EX_peplys(e)	98.132	6.63227
EX_xoltri25(e)	100		FUC13GALACGLCGAL14ACGLCGALGLUSIDEtg	100	5.61557e-12		EX_retnglc(e)	99.8249	1.19593		LNLNCGCPT2	95.5118	9.49467		EX_pglyc_hs(e)	98.132	6.63227
EX_xoltri27(e)	100		FUC14GALACGLCGALGLUSIDEte	100	5.61557e-12		EX_retpalm(e)	99.8249	1.19593		LNLNCGCRNt	95.5118	9.49467		EX_phe-L(e)	98.132	6.63227
EX_xylt(e)	100		FUC14GALACGLCGALGLUSIDEtg	100	5.61557e-12		EX_rib-D(e)	99.8249	1.19593		LNLNCGt	95.5118	9.49467		EX_pheme(e)	98.132	6.63227
EX_yvite(e)	100		FUCACGALFUCGALACGLCGALGLUSIDEte	100	5.61557e-12		EX_ribflv(e)	99.8249	1.19593		LPCOXp	95.5118	9.49467		EX_phyQ(e)	98.132	6.63227
F1Atg	100		FUCACGALFUCGALACGLCGALGLUSIDEtg	100	5.61557e-12		EX_Rtotal(e)	99.8249	1.19593		LPS3e	95.5118	9.49467		EX_phyt(e)	98.132	6.63227
F1PGT	100		FUCACNGAL14ACGLCGALGLUSIDEte	100	5.61557e-12		EX_Rtotal2(e)	99.8249	1.19593		LS3	95.5118	9.49467		EX_pnto-R(e)	98.132	6.63227
F6Tg	100		FUCACNGAL14ACGLCGALGLUSIDEtg	100	5.61557e-12		EX_Rtotal3(e)	99.8249	1.19593		LSTO1r	95.5118	9.49467		EX_ppa(e)	98.132	6.63227
FACOAL140i	100		FUCACNGALACGLCGALGLUSIDEte	100	5.61557e-12		EX_s2l2fn2m2masn(e)	99.8249	1.19593		LTA4H	95.5118	9.49467		EX_prgstrn(e)	98.132	6.63227
FACOAL150	100		FUCACNGALACGLCGALGLUSIDEtg	100	5.61557e-12		EX_s2l2n2m2masn(e)	99.8249	1.19593		LTDCL	95.5118	9.49467		EX_pro-D(e)	98.132	6.63227
FACOAL160i	100		FUCASE2ly	100	5.61557e-12		EX_sarcs(e)	99.8249	1.19593		LYSMTF1n	95.5118	9.49467		EX_prostgd2(e)	98.132	6.63227
FACOAL161	100		FUCASEly	100	5.61557e-12		EX_sel(e)	99.8249	1.19593		LYSMTF2n	95.5118	9.49467		EX_prostge1(e)	98.132	6.63227
FACOAL170	100		FUCFUC12GAL14ACGLCGALGLUSIDEte	100	5.61557e-12		EX_ser-D(e)	99.8249	1.19593		LYSMTF3n	95.5118	9.49467		EX_prostge2(e)	98.132	6.63227
FACOAL180i	100		FUCFUC12GAL14ACGLCGALGLUSIDEtg	100	5.61557e-12		EX_sl-L(e)	99.8249	1.19593		LYSt4	95.5118	9.49467		EX_prostgf2(e)	98.132	6.63227
FACOAL1812	100		FUCFUC132GALACGLCGAL14ACGLCGALGLUSIDEte	100	5.61557e-12		EX_so4(e)	99.8249	1.19593		LYStiDF	95.5118	9.49467		EX_ptdca(e)	98.132	6.63227
FACOAL1813	100		FUCFUC132GALACGLCGAL14ACGLCGALGLUSIDEtg	100	5.61557e-12		EX_spc_hs(e)	99.8249	1.19593		LYStip	95.5118	9.49467		EX_pydam(e)	98.132	6.63227
FACOAL181i	100		FUCFUCFUCGALACGLC13GALACGLCGAL14ACGLCGALGLUSIDEte	100	5.61557e-12		EX_strch1(e)	99.8249	1.19593		M4ATAer	95.5118	9.49467		EX_pydx(e)	98.132	6.63227
FACOAL1821	100		FUCFUCFUCGALACGLC13GALACGLCGAL14ACGLCGALGLUSIDEtg	100	5.61557e-12		EX_strch2(e)	99.8249	1.19593		M4BET2er	95.5118	9.49467		EX_pydxn(e)	98.132	6.63227
FACOAL1822	100		FUCFUCFUCGALACGLCGAL14ACGLCGALGLUSIDEte	100	5.61557e-12		EX_strdnc(e)	99.8249	1.19593		M4BTAer	95.5118	9.49467		EX_pyr(e)	98.132	6.63227
FACOAL1831	100		FUCFUCFUCGALACGLCGAL14ACGLCGALGLUSIDEtg	100	5.61557e-12		EX_tag_hs(e)	99.8249	1.19593		M4MPDOL_Uter	95.5118	9.49467		EX_retfa(e)	98.132	6.63227
FACOAL1832	100		FUCFUCGALACGLCGALGLUSIDEte	100	5.61557e-12		EX_tagat-D(e)	99.8249	1.19593		MACACI	95.5118	9.49467		EX_retinol-9-cis(e)	98.132	6.63227
FACOAL184	100		FUCFUCGALACGLCGALGLUSIDEtg	100	5.61557e-12		EX_tchola(e)	99.8249	1.19593		MALSO3tm	95.5118	9.49467		EX_retinol-cis-11(e)	98.132	6.63227
FACOAL191	100		FUCGAL14ACGLCGALGLUSIDEte	100	5.61557e-12		EX_tcynt(e)	99.8249	1.19593		MALT	95.5118	9.49467		EX_retinol(e)	98.132	6.63227
FACOAL200	100		FUCGAL14ACGLCGALGLUSIDEtg	100	5.61557e-12		EX_tdchola(e)	99.8249	1.19593		MALTe	95.5118	9.49467		EX_retn(e)	98.132	6.63227
FACOAL203	100		FUCGALFUCGALACGLCGALGLUSIDEte	100	5.61557e-12		EX_tethex3(e)	99.8249	1.19593		MALTly	95.5118	9.49467		EX_retnglc(e)	98.132	6.63227
FACOAL204	100		FUCGALFUCGALACGLCGALGLUSIDEtg	100	5.61557e-12		EX_tetpent3(e)	99.8249	1.19593		MAN1_6B1er	95.5118	9.49467		EX_retpalm(e)	98.132	6.63227
FACOAL2042	100		FUCGALGBSIDEte	100	5.61557e-12		EX_tetpent6(e)	99.8249	1.19593		MAN1_7Ber	95.5118	9.49467		EX_rib-D(e)	98.132	6.63227
FACOAL204i	100		FUCGALGBSIDEtg	100	5.61557e-12		EX_tettet6(e)	99.8249	1.19593		MAN2_6B1er	95.5118	9.49467		EX_ribflv(e)	98.132	6.63227
FACOAL205	100		FUCtly	100	5.61557e-12		EX_thf(e)	99.8249	1.19593		MAN2_7Cer	95.5118	9.49467		EX_Rtotal(e)	98.132	6.63227
FACOAL206	100		FUMAC	100	5.61557e-12		EX_thm(e)	99.8249	1.19593		MANt1r	95.5118	9.49467		EX_Rtotal2(e)	98.132	6.63227
FACOAL224	100		FUMSO3tm	100	5.61557e-12		EX_thmmp(e)	99.8249	1.19593		MANt4	95.5118	9.49467		EX_Rtotal3(e)	98.132	6.63227
FACOAL2251	100		FUMSO4tm	100	5.61557e-12		EX_thmtp(e)	99.8249	1.19593		MAOX	95.5118	9.49467		EX_s2l2fn2m2masn(e)	98.132	6.63227
FACOAL2252	100		FUMtm	100	5.61557e-12		EX_thymd(e)	99.8249	1.19593		MCD	95.5118	9.49467		EX_s2l2n2m2masn(e)	98.132	6.63227
FACOAL226	100		FUMTSULtm	100	5.61557e-12		EX_thyox-L(e)	99.8249	1.19593		MCDm	95.5118	9.49467		EX_sarcs(e)	98.132	6.63227
FACOAL226i	100		FUT11g	100	5.61557e-12		EX_tmndnc(e)	99.8249	1.19593		MCDp	95.5118	9.49467		EX_sel(e)	98.132	6.63227
FACOAL240	100		FUT12g	100	5.61557e-12		EX_tre(e)	99.8249	1.19593		MCOATA	95.5118	9.49467		EX_ser-D(e)	98.132	6.63227
FACOAL241	100		FUT14g	100	5.61557e-12		EX_triodthy(e)	99.8249	1.19593		MCOATAm	95.5118	9.49467		EX_sl-L(e)	98.132	6.63227
FACOAL244_1	100		FUT15g	100	5.61557e-12		EX_triodthysuf(e)	99.8249	1.19593		MECOALm	95.5118	9.49467		EX_so4(e)	98.132	6.63227
FACOAL245_1	100		FUT16g	100	5.61557e-12		EX_tststerone(e)	99.8249	1.19593		MECOAS1m	95.5118	9.49467		EX_strch1(e)	98.132	6.63227
FACOAL245_2	100		FUT17g	100	5.61557e-12		EX_tststeroneglc(e)	99.8249	1.19593		MELATN23DOX	95.5118	9.49467		EX_strch2(e)	98.132	6.63227
FACOAL246_1	100		FUT18g	100	5.61557e-12		EX_tsul(e)	99.8249	1.19593		MELATNOX	95.5118	9.49467		EX_strdnc(e)	98.132	6.63227
FACOAL260	100		FUT31g	100	5.61557e-12		EX_ttdca(e)	99.8249	1.19593		MEOHtly	95.5118	9.49467		EX_tag_hs(e)	98.132	6.63227
FACOAL80i	100		FUT32g	100	5.61557e-12		EX_txa2(e)	99.8249	1.19593		MEOHtr	95.5118	9.49467		EX_tagat-D(e)	98.132	6.63227
FADH2tru	100		FUT33g	100	5.61557e-12		EX_tymsf(e)	99.8249	1.19593		MEPIVESSte	95.5118	9.49467		EX_tchola(e)	98.132	6.63227
FADH2tx	100		FUT34g	100	5.61557e-12		EX_Tyr-ggn(e)	99.8249	1.19593		METt4	95.5118	9.49467		EX_tcynt(e)	98.132	6.63227
FADtru	100		FUT35g	100	5.61557e-12		EX_tyr-L(e)	99.8249	1.19593		MGSA	95.5118	9.49467		EX_tdchola(e)	98.132	6.63227
FADtx	100		FUT910g	100	5.61557e-12		EX_udp(e)	99.8249	1.19593		MGSA2	95.5118	9.49467		EX_tethex3(e)	98.132	6.63227
FALDH	100		FUT911g	100	5.61557e-12		EX_ump(e)	99.8249	1.19593		MI13456PK	95.5118	9.49467		EX_tetpent3(e)	98.132	6.63227
FALDtly	100		FUT91g	100	5.61557e-12		EX_urate(e)	99.8249	1.19593		MI13456Ptn	95.5118	9.49467		EX_tetpent6(e)	98.132	6.63227
FALDtm	100		FUT92g	100	5.61557e-12		EX_utp(e)	99.8249	1.19593		MI1345PKn	95.5118	9.49467		EX_tettet6(e)	98.132	6.63227
FAOXC11	100		FUT93g	100	5.61557e-12		EX_vacc(e)	99.8249	1.19593		MI1346PKn	95.5118	9.49467		EX_thf(e)	98.132	6.63227
FAOXC140	100		FUT94g	100	5.61557e-12		EX_vitd2(e)	99.8249	1.19593		MI1346Ptn	95.5118	9.49467		EX_thm(e)	98.132	6.63227
FAOXC150m	100		FUT95g	100	5.61557e-12		EX_vitd3(e)	99.8249	1.19593		MI134P4P	95.5118	9.49467		EX_thmmp(e)	98.132	6.63227
FAOXC160	100		FUT96g	100	5.61557e-12		EX_xolest_hs(e)	99.8249	1.19593		MI134PK	95.5118	9.49467		EX_thmtp(e)	98.132	6.63227
FAOXC16080m	100		FUT97g	100	5.61557e-12		EX_xoltri24(e)	99.8249	1.19593		MI13PP	95.5118	9.49467		EX_thymd(e)	98.132	6.63227
FAOXC16080x	100		FUT98g	100	5.61557e-12		EX_xoltri25(e)	99.8249	1.19593		MI1456PKn	95.5118	9.49467		EX_thyox-L(e)	98.132	6.63227
FAOXC161802m	100		FUT99g	100	5.61557e-12		EX_xoltri27(e)	99.8249	1.19593		MI145P6Kn	95.5118	9.49467		EX_tmndnc(e)	98.132	6.63227
FAOXC16180m	100		G14T18g	100	5.61557e-12		EX_xylt(e)	99.8249	1.19593		MI145PKn	95.5118	9.49467		EX_tre(e)	98.132	6.63227
FAOXC170m	100		G14T19g	100	5.61557e-12		EX_yvite(e)	99.8249	1.19593		MI14P4P	95.5118	9.49467		EX_triodthy(e)	98.132	6.63227
FAOXC180	100		G14T20g	100	5.61557e-12		F1Atg	99.8249	1.19593		MI14Ptn	95.5118	9.49467		EX_triodthysuf(e)	98.132	6.63227
FAOXC180x	100		G14T21g	100	5.61557e-12		F1PGT	99.8249	1.19593		MI1P-Dtn	95.5118	9.49467		EX_tststerone(e)	98.132	6.63227
FAOXC1811601m	100		G1M6MASNB1terg	100	5.61557e-12		F6Tg	99.8249	1.19593		MI3456PK	95.5118	9.49467		EX_tststeroneglc(e)	98.132	6.63227
FAOXC1811602m	100		G1M7MASNBterg	100	5.61557e-12		FACOAL140i	99.8249	1.19593		MLTG1	95.5118	9.49467		EX_tsul(e)	98.132	6.63227
FAOXC1811603m	100		G1M7MASNCterg	100	5.61557e-12		FACOAL150	99.8249	1.19593		MLTG1ly	95.5118	9.49467		EX_ttdca(e)	98.132	6.63227
FAOXC182806m	100		G1M8MASNterg	100	5.61557e-12		FACOAL160i	99.8249	1.19593		MM5cg	95.5118	9.49467		EX_txa2(e)	98.132	6.63227
FAOXC18280m	100		G2M8MASNterg	100	5.61557e-12		FACOAL161	99.8249	1.19593		MM6ag	95.5118	9.49467		EX_tymsf(e)	98.132	6.63227
FAOXC183803m	100		G3M8MASNterg	100	5.61557e-12		FACOAL170	99.8249	1.19593		MM6B1ag	95.5118	9.49467		EX_Tyr-ggn(e)	98.132	6.63227
FAOXC183806m	100		G5SADs	100	5.61557e-12		FACOAL180i	99.8249	1.19593		MM6B1bg	95.5118	9.49467		EX_tyr-L(e)	98.132	6.63227
FAOXC183806x	100		G6PDH1er	100	5.61557e-12		FACOAL1812	99.8249	1.19593		MM6B2g	95.5118	9.49467		EX_udp(e)	98.132	6.63227
FAOXC18480m	100		G6PDH1rer	100	5.61557e-12		FACOAL1813	99.8249	1.19593		MM7Ag	95.5118	9.49467		EX_ump(e)	98.132	6.63227
FAOXC18480x	100		G6PDH2rer	100	5.61557e-12		FACOAL181i	99.8249	1.19593		MM7B1g	95.5118	9.49467		EX_urate(e)	98.132	6.63227
FAOXC200180m	100		GACPAILter	100	5.61557e-12		FACOAL1821	99.8249	1.19593		MM7Cag	95.5118	9.49467		EX_utp(e)	98.132	6.63227
FAOXC200180x	100		GALACGLCGALGBSIDEte	100	5.61557e-12		FACOAL1822	99.8249	1.19593		MM7Cbg	95.5118	9.49467		EX_vacc(e)	98.132	6.63227
FAOXC2031836m	100		GALASE10ly	100	5.61557e-12		FACOAL1831	99.8249	1.19593		MM8Cg	95.5118	9.49467		EX_vitd2(e)	98.132	6.63227
FAOXC204	100		GALASE11ly	100	5.61557e-12		FACOAL1832	99.8249	1.19593		MMCD	95.5118	9.49467		EX_vitd3(e)	98.132	6.63227
FAOXC204184m	100		GALASE12ly	100	5.61557e-12		FACOAL184	99.8249	1.19593		MMCDp	95.5118	9.49467		EX_xolest_hs(e)	98.132	6.63227
FAOXC2051843m	100		GALASE13ly	100	5.61557e-12		FACOAL191	99.8249	1.19593		MTAP	95.5118	9.49467		EX_xoltri24(e)	98.132	6.63227
FAOXC2051843x	100		GALASE14ly	100	5.61557e-12		FACOAL200	99.8249	1.19593		MTHFD	95.5118	9.49467		EX_xoltri25(e)	98.132	6.63227
FAOXC2242046m	100		GALASE15ly	100	5.61557e-12		FACOAL203	99.8249	1.19593		MTHFD2	95.5118	9.49467		EX_xoltri27(e)	98.132	6.63227
FAOXC2242046x	100		GALASE1ly	100	5.61557e-12		FACOAL204	99.8249	1.19593		NABTNO	95.5118	9.49467		EX_xylt(e)	98.132	6.63227
FAOXC2251836m	100		GALASE20ly	100	5.61557e-12		FACOAL2042	99.8249	1.19593		NABTNOm	95.5118	9.49467		EX_yvite(e)	98.132	6.63227
FAOXC2251836x	100		GALASE3ly	100	5.61557e-12		FACOAL204i	99.8249	1.19593		NACHEX10ly	95.5118	9.49467		F1Atg	98.132	6.63227
FAOXC2252053m	100		GALASE4ly	100	5.61557e-12		FACOAL205	99.8249	1.19593		NACHEX11ly	95.5118	9.49467		F1PGT	98.132	6.63227
FAOXC2252053x	100		GALASE5ly	100	5.61557e-12		FACOAL206	99.8249	1.19593		NACHEX12ly	95.5118	9.49467		F6Tg	98.132	6.63227
FAOXC226	100		GALASE6ly	100	5.61557e-12		FACOAL224	99.8249	1.19593		NACHEX13ly	95.5118	9.49467		FACOAL140i	98.132	6.63227
FAOXC226205m	100		GALASE7ly	100	5.61557e-12		FACOAL2251	99.8249	1.19593		NACHEX14ly	95.5118	9.49467		FACOAL150	98.132	6.63227
FAOXC226205x	100		GALASE8ly	100	5.61557e-12		FACOAL2252	99.8249	1.19593		NACHEX15ly	95.5118	9.49467		FACOAL160i	98.132	6.63227
FAOXC240200x	100		GALASE9ly	100	5.61557e-12		FACOAL226	99.8249	1.19593		NACHEX16ly	95.5118	9.49467		FACOAL161	98.132	6.63227
FAOXC241181x	100		GALC	100	5.61557e-12		FACOAL226i	99.8249	1.19593		NACHEX17ly	95.5118	9.49467		FACOAL170	98.132	6.63227
FAOXC2442246x	100		GALFUC12GAL14ACGLCGALGLUSIDEte	100	5.61557e-12		FACOAL240	99.8249	1.19593		NACHEX18ly	95.5118	9.49467		FACOAL180i	98.132	6.63227
FAOXC2452253x	100		GALFUC12GAL14ACGLCGALGLUSIDEtg	100	5.61557e-12		FACOAL241	99.8249	1.19593		NACHEX19ly	95.5118	9.49467		FACOAL1812	98.132	6.63227
FAOXC2452256x	100		GALFUCGALACGLCGAL14ACGLCGALGLUSIDEte	100	5.61557e-12		FACOAL244_1	99.8249	1.19593		NACHEX1ly	95.5118	9.49467		FACOAL1813	98.132	6.63227
FAOXC246226x	100		GALFUCGALACGLCGAL14ACGLCGALGLUSIDEtg	100	5.61557e-12		FACOAL245_1	99.8249	1.19593		NACHEX20ly	95.5118	9.49467		FACOAL181i	98.132	6.63227
FAOXC260240x	100		GALGALFUCFUCGALACGLCGALACGLCGAL14ACGLCGALGLUSIDEte	100	5.61557e-12		FACOAL245_2	99.8249	1.19593		NACHEX21ly	95.5118	9.49467		FACOAL1821	98.132	6.63227
FAOXC80	100		GALGALFUCFUCGALACGLCGALACGLCGAL14ACGLCGALGLUSIDEtg	100	5.61557e-12		FACOAL246_1	99.8249	1.19593		NACHEX22ly	95.5118	9.49467		FACOAL1822	98.132	6.63227
FAS100COA	100		GALGALGALTHCRMte	100	5.61557e-12		FACOAL260	99.8249	1.19593		NACHEX24ly	95.5118	9.49467		FACOAL1831	98.132	6.63227
FAS120COA	100		GALNACT1g	100	5.61557e-12		FACOAL80i	99.8249	1.19593		NACHEX25ly	95.5118	9.49467		FACOAL1832	98.132	6.63227
FAS140COA	100		GALNACT2g	100	5.61557e-12		FADH2tru	99.8249	1.19593		NACHEX26ly	95.5118	9.49467		FACOAL184	98.132	6.63227
FAS160COA	100		GALNACT3g	100	5.61557e-12		FADH2tx	99.8249	1.19593		NACHEX27ly	95.5118	9.49467		FACOAL191	98.132	6.63227
FAS180COA	100		GALNACT4g	100	5.61557e-12		FADtru	99.8249	1.19593		NACHEX2ly	95.5118	9.49467		FACOAL200	98.132	6.63227
FAS80COA_L	100		GALNACT5g	100	5.61557e-12		FADtx	99.8249	1.19593		NACHEX3ly	95.5118	9.49467		FACOAL203	98.132	6.63227
FATP1t	100		GALOR	100	5.61557e-12		FALDH	99.8249	1.19593		NACHEX4ly	95.5118	9.49467		FACOAL204	98.132	6.63227
FATP2t	100		GALSIDEtl	100	5.61557e-12		FALDtly	99.8249	1.19593		NACHEX5ly	95.5118	9.49467		FACOAL2042	98.132	6.63227
FATP3t	100		GALt1r	100	5.61557e-12		FALDtm	99.8249	1.19593		NACHEX6ly	95.5118	9.49467		FACOAL204i	98.132	6.63227
FATP4t	100		GALt2_2	100	5.61557e-12		FAOXC11	99.8249	1.19593		NACHEX7ly	95.5118	9.49467		FACOAL205	98.132	6.63227
FATP5t	100		GALT2g	100	5.61557e-12		FAOXC140	99.8249	1.19593		NACHEX8ly	95.5118	9.49467		FACOAL206	98.132	6.63227
FATP6t	100		GALt4	100	5.61557e-12		FAOXC150m	99.8249	1.19593		NACHEX9ly	95.5118	9.49467		FACOAL224	98.132	6.63227
FATP7t	100		GALt4_2	100	5.61557e-12		FAOXC160	99.8249	1.19593		NACUP	95.5118	9.49467		FACOAL2251	98.132	6.63227
FATP8t	100		GALTg	100	5.61557e-12		FAOXC16080m	99.8249	1.19593		NADH2-u10m	95.5118	9.49467		FACOAL2252	98.132	6.63227
FATP9t	100		GAMt1r	100	5.61557e-12		FAOXC16080x	99.8249	1.19593		NADHtpu	95.5118	9.49467		FACOAL226	98.132	6.63227
FBA	100		GAMYe	100	5.61557e-12		FAOXC161802m	99.8249	1.19593		NADHtru	95.5118	9.49467		FACOAL226i	98.132	6.63227
FBA2	100		GAO1	100	5.61557e-12		FAOXC16180m	99.8249	1.19593		NADN	95.5118	9.49467		FACOAL240	98.132	6.63227
FBA4	100		GAO1g	100	5.61557e-12		FAOXC170m	99.8249	1.19593		NADNe	95.5118	9.49467		FACOAL241	98.132	6.63227
FBP	100		GAO2	100	5.61557e-12		FAOXC180	99.8249	1.19593		NADPHtru	95.5118	9.49467		FACOAL244_1	98.132	6.63227
FBP26	100		GASNASE3ly	100	5.61557e-12		FAOXC180x	99.8249	1.19593		NADPN	95.5118	9.49467		FACOAL245_1	98.132	6.63227
FCLTm	100		GASNASEly	100	5.61557e-12		FAOXC1811601m	99.8249	1.19593		NADPNe	95.5118	9.49467		FACOAL245_2	98.132	6.63227
FE2t	100		GCALDD	100	5.61557e-12		FAOXC1811602m	99.8249	1.19593		NADPtru	95.5118	9.49467		FACOAL246_1	98.132	6.63227
FE2tm	100		GCALDDm	100	5.61557e-12		FAOXC1811603m	99.8249	1.19593		NADS2	95.5118	9.49467		FACOAL260	98.132	6.63227
FK	100		GCHOLAt	100	5.61557e-12		FAOXC182806m	99.8249	1.19593		NADtpu	95.5118	9.49467		FACOAL80i	98.132	6.63227
FMNAT	100		GCHOLAt2	100	5.61557e-12		FAOXC18280m	99.8249	1.19593		NADtru	95.5118	9.49467		FADH2tru	98.132	6.63227
FOLR2	100		GCHOLAte	100	5.61557e-12		FAOXC183803m	99.8249	1.19593		NAGA2ly	95.5118	9.49467		FADH2tx	98.132	6.63227
FOLt2	100		GCHOLAtx	100	5.61557e-12		FAOXC183806m	99.8249	1.19593		NAGLCAly	95.5118	9.49467		FADtru	98.132	6.63227
FORt2m	100		GCNTg	100	5.61557e-12		FAOXC183806x	99.8249	1.19593		NAHCO3_HCLt	95.5118	9.49467		FADtx	98.132	6.63227
FORtr	100		GD1B2te	100	5.61557e-12		FAOXC18480m	99.8249	1.19593		NAIt	95.5118	9.49467		FALDH	98.132	6.63227
FORtrn	100		GD1B2tg	100	5.61557e-12		FAOXC18480x	99.8249	1.19593		NaKt	95.5118	9.49467		FALDtly	98.132	6.63227
FPGS	100		GD1Cte	100	5.61557e-12		FAOXC200180m	99.8249	1.19593		NAt3_1g	95.5118	9.49467		FALDtm	98.132	6.63227
FPGS2	100		GD1Ctg	100	5.61557e-12		FAOXC200180x	99.8249	1.19593		NAt5	95.5118	9.49467		FAOXC11	98.132	6.63227
FPGS2m	100		GDCHOLAte	100	5.61557e-12		FAOXC2031836m	99.8249	1.19593		NAtx	95.5118	9.49467		FAOXC140	98.132	6.63227
FPGS3	100		GGH-10FTHF5GLUe	100	5.61557e-12		FAOXC204	99.8249	1.19593		NCAMUP	95.5118	9.49467		FAOXC150m	98.132	6.63227
FPGS3m	100		GGH-10FTHF6GLUe	100	5.61557e-12		FAOXC204184m	99.8249	1.19593		NCCt	95.5118	9.49467		FAOXC160	98.132	6.63227
FPGS4	100		GGH-10FTHF7GLUe	100	5.61557e-12		FAOXC2051843m	99.8249	1.19593		NCKt	95.5118	9.49467		FAOXC16080m	98.132	6.63227
FPGS4m	100		GGH-5DHFe	100	5.61557e-12		FAOXC2051843x	99.8249	1.19593		NCNt	95.5118	9.49467		FAOXC16080x	98.132	6.63227
FPGS5	100		GGH-5THFe	100	5.61557e-12		FAOXC2242046m	99.8249	1.19593		NDP10ex	95.5118	9.49467		FAOXC161802m	98.132	6.63227
FPGS5m	100		GGH-6DHFe	100	5.61557e-12		FAOXC2242046x	99.8249	1.19593		NDP3ex	95.5118	9.49467		FAOXC16180m	98.132	6.63227
FPGS6	100		GGH-6THFe	100	5.61557e-12		FAOXC2251836m	99.8249	1.19593		NDP7ex	95.5118	9.49467		FAOXC170m	98.132	6.63227
FPGS6m	100		GGH-7DHFe	100	5.61557e-12		FAOXC2251836x	99.8249	1.19593		NDP7g	95.5118	9.49467		FAOXC180	98.132	6.63227
FPGS7	100		GGH-7THFe	100	5.61557e-12		FAOXC2252053m	99.8249	1.19593		NDP8ex	95.5118	9.49467		FAOXC180x	98.132	6.63227
FPGS7m	100		GHMT2rm	100	5.61557e-12		FAOXC2252053x	99.8249	1.19593		NDPK10m	95.5118	9.49467		FAOXC1811601m	98.132	6.63227
FPGS8	100		GHMT3	100	5.61557e-12		FAOXC226	99.8249	1.19593		NDPK1m	95.5118	9.49467		FAOXC1811602m	98.132	6.63227
FPGS8m	100		GHMT3m	100	5.61557e-12		FAOXC226205m	99.8249	1.19593		NDPK2m	95.5118	9.49467		FAOXC1811603m	98.132	6.63227
FPGS9	100		GLACO	100	5.61557e-12		FAOXC226205x	99.8249	1.19593		NDPK9m	95.5118	9.49467		FAOXC182806m	98.132	6.63227
FPGS9m	100		GLACOm	100	5.61557e-12		FAOXC240200x	99.8249	1.19593		NH4t3r	95.5118	9.49467		FAOXC18280m	98.132	6.63227
FPGSm	100		GLACter	100	5.61557e-12		FAOXC241181x	99.8249	1.19593		NH4tp	95.5118	9.49467		FAOXC183803m	98.132	6.63227
FRDPtc	100		GLAl	100	5.61557e-12		FAOXC2442246x	99.8249	1.19593		NICRNS	95.5118	9.49467		FAOXC183806m	98.132	6.63227
FRDPtr	100		GLCAASE1ly	100	5.61557e-12		FAOXC2452253x	99.8249	1.19593		NICRNTtn	95.5118	9.49467		FAOXC183806x	98.132	6.63227
FRTT	100		GLCAASE4ly	100	5.61557e-12		FAOXC2452256x	99.8249	1.19593		NKCC2t	95.5118	9.49467		FAOXC18480m	98.132	6.63227
FRUt1r	100		GLCAASE5ly	100	5.61557e-12		FAOXC246226x	99.8249	1.19593		NKCCt	95.5118	9.49467		FAOXC18480x	98.132	6.63227
FRUt4	100		GLCAASE6ly	100	5.61557e-12		FAOXC260240x	99.8249	1.19593		NMNATm	95.5118	9.49467		FAOXC200180m	98.132	6.63227
FT	100		GLCAASE7ly	100	5.61557e-12		FAOXC80	99.8249	1.19593		NMNS	95.5118	9.49467		FAOXC200180x	98.132	6.63227
FTCD	100		GLCAE2g	100	5.61557e-12		FAS100COA	99.8249	1.19593		NMPTRCOX	95.5118	9.49467		FAOXC2031836m	98.132	6.63227
FTHFCL	100		GLCAT2g	100	5.61557e-12		FAS120COA	99.8249	1.19593		NNAT	95.5118	9.49467		FAOXC204	98.132	6.63227
FTHFDH	100		GLCAT3g	100	5.61557e-12		FAS140COA	99.8249	1.19593		NNATm	95.5118	9.49467		FAOXC204184m	98.132	6.63227
FTHFL	100		GLCAT4g	100	5.61557e-12		FAS160COA	99.8249	1.19593		NNATn	95.5118	9.49467		FAOXC2051843m	98.132	6.63227
FTHFLm	100		GLCAT5g	100	5.61557e-12		FAS180COA	99.8249	1.19593		NNDPR	95.5118	9.49467		FAOXC2051843x	98.132	6.63227
FUC13GALACGLCGAL14ACGLCGALGLUSIDEte	100		GLCAT6g	100	5.61557e-12		FAS80COA_L	99.8249	1.19593		NOS1	95.5118	9.49467		FAOXC2242046m	98.132	6.63227
FUC13GALACGLCGAL14ACGLCGALGLUSIDEtg	100		GLCAT7g	100	5.61557e-12		FATP1t	99.8249	1.19593		NOS2	95.5118	9.49467		FAOXC2242046x	98.132	6.63227
FUC14GALACGLCGALGLUSIDEte	100		GLCAT8g	100	5.61557e-12		FATP2t	99.8249	1.19593		NOt	95.5118	9.49467		FAOXC2251836m	98.132	6.63227
FUC14GALACGLCGALGLUSIDEtg	100		GLCAT9g	100	5.61557e-12		FATP3t	99.8249	1.19593		NP1	95.5118	9.49467		FAOXC2251836x	98.132	6.63227
FUCACGALFUCGALACGLCGALGLUSIDEte	100		GLCATg	100	5.61557e-12		FATP4t	99.8249	1.19593		NPTHLte	95.5118	9.49467		FAOXC2252053m	98.132	6.63227
FUCACGALFUCGALACGLCGALGLUSIDEtg	100		GLCMter	100	5.61557e-12		FATP5t	99.8249	1.19593		NRPPHRSFt	95.5118	9.49467		FAOXC2252053x	98.132	6.63227
FUCACNGAL14ACGLCGALGLUSIDEte	100		GLCNACASE1ly	100	5.61557e-12		FATP6t	99.8249	1.19593		NRPPHRSULT	95.5118	9.49467		FAOXC226	98.132	6.63227
FUCACNGAL14ACGLCGALGLUSIDEtg	100		GLCNACASE2ly	100	5.61557e-12		FATP7t	99.8249	1.19593		NRPPHRVESSEC	95.5118	9.49467		FAOXC226205m	98.132	6.63227
FUCACNGALACGLCGALGLUSIDEte	100		GLCNACASE3ly	100	5.61557e-12		FATP8t	99.8249	1.19593		NRVNCCPT1	95.5118	9.49467		FAOXC226205x	98.132	6.63227
FUCACNGALACGLCGALGLUSIDEtg	100		GLCNACASE4ly	100	5.61557e-12		FATP9t	99.8249	1.19593		NRVNCCPT2	95.5118	9.49467		FAOXC240200x	98.132	6.63227
FUCASE2e	100		GLCNACASE5ly	100	5.61557e-12		FBA	99.8249	1.19593		NRVNCCRNt	95.5118	9.49467		FAOXC241181x	98.132	6.63227
FUCASE2ly	100		GLCNACDASg	100	5.61557e-12		FBA2	99.8249	1.19593		NRVNCt	95.5118	9.49467		FAOXC2442246x	98.132	6.63227
FUCASEe	100		GLCNACT1g	100	5.61557e-12		FBA4	99.8249	1.19593		NT5C	95.5118	9.49467		FAOXC2452253x	98.132	6.63227
FUCASEly	100		GLCNACT2g	100	5.61557e-12		FBP	99.8249	1.19593		NTD1	95.5118	9.49467		FAOXC2452256x	98.132	6.63227
FUCFUC12GAL14ACGLCGALGLUSIDEte	100		GLCNACT3g	100	5.61557e-12		FBP26	99.8249	1.19593		NTD11	95.5118	9.49467		FAOXC246226x	98.132	6.63227
FUCFUC12GAL14ACGLCGALGLUSIDEtg	100		GLCNACT4g	100	5.61557e-12		FCLTm	99.8249	1.19593		NTD2	95.5118	9.49467		FAOXC260240x	98.132	6.63227
FUCFUC132GALACGLCGAL14ACGLCGALGLUSIDEte	100		GLCNACT5g	100	5.61557e-12		FE2t	99.8249	1.19593		NTD2e	95.5118	9.49467		FAOXC80	98.132	6.63227
FUCFUC132GALACGLCGAL14ACGLCGALGLUSIDEtg	100		GLCt1r	100	5.61557e-12		FE2tm	99.8249	1.19593		NTD2l	95.5118	9.49467		FAS100COA	98.132	6.63227
FUCFUCFUCGALACGLC13GALACGLCGAL14ACGLCGALGLUSIDEte	100		GLCt2_2	100	5.61557e-12		FK	99.8249	1.19593		NTD2m	95.5118	9.49467		FAS120COA	98.132	6.63227
FUCFUCFUCGALACGLC13GALACGLCGAL14ACGLCGALGLUSIDEtg	100		GLCt2r	100	5.61557e-12		FMNAT	99.8249	1.19593		NTD3	95.5118	9.49467		FAS140COA	98.132	6.63227
FUCFUCFUCGALACGLCGAL14ACGLCGALGLUSIDEte	100		GLCt4	100	5.61557e-12		FOLR2	99.8249	1.19593		NTD3l	95.5118	9.49467		FAS160COA	98.132	6.63227
FUCFUCFUCGALACGLCGAL14ACGLCGALGLUSIDEtg	100		GLCt4_2	100	5.61557e-12		FOLt2	99.8249	1.19593		NTD4e	95.5118	9.49467		FAS180COA	98.132	6.63227
FUCFUCGALACGLCGALGLUSIDEte	100		GLNALANaEx	100	5.61557e-12		FORt2m	99.8249	1.19593		NTD4l	95.5118	9.49467		FAS80COA_L	98.132	6.63227
FUCFUCGALACGLCGALGLUSIDEtg	100		GLNASNNaEx	100	5.61557e-12		FORtr	99.8249	1.19593		NTD5l	95.5118	9.49467		FATP1t	98.132	6.63227
FUCGAL14ACGLCGALGLUSIDEte	100		GLNCYSNaEx	100	5.61557e-12		FORtrn	99.8249	1.19593		NTD5m	95.5118	9.49467		FATP2t	98.132	6.63227
FUCGAL14ACGLCGALGLUSIDEtg	100		GLNLASEer	100	5.61557e-12		FPGS	99.8249	1.19593		NTD6	95.5118	9.49467		FATP3t	98.132	6.63227
FUCGALFUCGALACGLCGALGLUSIDEte	100		GLNSERNaEx	100	5.61557e-12		FPGS2	99.8249	1.19593		NTD6l	95.5118	9.49467		FATP4t	98.132	6.63227
FUCGALFUCGALACGLCGALGLUSIDEtg	100		GLNt4	100	5.61557e-12		FPGS2m	99.8249	1.19593		NTD7	95.5118	9.49467		FATP5t	98.132	6.63227
FUCGALGBSIDEte	100		GLNTHRNaEx	100	5.61557e-12		FPGS3	99.8249	1.19593		NTD7e	95.5118	9.49467		FATP6t	98.132	6.63227
FUCGALGBSIDEtg	100		GLNtN1	100	5.61557e-12		FPGS3m	99.8249	1.19593		NTD7l	95.5118	9.49467		FATP7t	98.132	6.63227
FUCtly	100		GLRASE	100	5.61557e-12		FPGS4	99.8249	1.19593		NTD8	95.5118	9.49467		FATP8t	98.132	6.63227
FUM	100		GLUTCOADHm	100	5.61557e-12		FPGS4m	99.8249	1.19593		NTD8l	95.5118	9.49467		FATP9t	98.132	6.63227
FUMAC	100		GLXO1	100	5.61557e-12		FPGS5	99.8249	1.19593		NTD9	95.5118	9.49467		FBA	98.132	6.63227
FUMm	100		GLXtm	100	5.61557e-12		FPGS5m	99.8249	1.19593		NTD9e	95.5118	9.49467		FBA2	98.132	6.63227
FUMSO3tm	100		GLXtp	100	5.61557e-12		FPGS6	99.8249	1.19593		NTD9l	95.5118	9.49467		FBA4	98.132	6.63227
FUMSO4tm	100		GLYATm	100	5.61557e-12		FPGS6m	99.8249	1.19593		NTMELYStner	95.5118	9.49467		FBP	98.132	6.63227
FUMtm	100		GLYC-St	100	5.61557e-12		FPGS7	99.8249	1.19593		NTP3e	95.5118	9.49467		FBP26	98.132	6.63227
FUMTSULtm	100		GLYC3Ptm	100	5.61557e-12		FPGS7m	99.8249	1.19593		NTPP11	95.5118	9.49467		FCLTm	98.132	6.63227
FUT11g	100		GLYCK2	100	5.61557e-12		FPGS8	99.8249	1.19593		NTPP9	95.5118	9.49467		FE2t	98.132	6.63227
FUT12g	100		GLYCLTDy	100	5.61557e-12		FPGS8m	99.8249	1.19593		O16G1e	95.5118	9.49467		FE2tm	98.132	6.63227
FUT14g	100		GLYCLTtp	100	5.61557e-12		FPGS9	99.8249	1.19593		O16G2e	95.5118	9.49467		FK	98.132	6.63227
FUT15g	100		GLYCtm	100	5.61557e-12		FPGS9m	99.8249	1.19593		O2St	95.5118	9.49467		FMNAT	98.132	6.63227
FUT16g	100		GLYKm	100	5.61557e-12		FPGSm	99.8249	1.19593		O2Stn	95.5118	9.49467		FOLR2	98.132	6.63227
FUT17g	100		GLYOXm	100	5.61557e-12		FRDPtc	99.8249	1.19593		O2Stx	95.5118	9.49467		FOLt2	98.132	6.63227
FUT18g	100		GLYt2r	100	5.61557e-12		FRDPtr	99.8249	1.19593		O2tn	95.5118	9.49467		FORt2m	98.132	6.63227
FUT31g	100		GLYt2rL	100	5.61557e-12		FRTT	99.8249	1.19593		OCDCAtr	95.5118	9.49467		FORtr	98.132	6.63227
FUT32g	100		GLYt4	100	5.61557e-12		FRUt1r	99.8249	1.19593		OCDCEAtr	95.5118	9.49467		FORtrn	98.132	6.63227
FUT33g	100		GLYt7(211)r	100	5.61557e-12		FRUt4	99.8249	1.19593		OCTAt	95.5118	9.49467		FPGS	98.132	6.63227
FUT34g	100		GLYt7(311)r	100	5.61557e-12		FT	99.8249	1.19593		OIVD3m	95.5118	9.49467		FPGS2	98.132	6.63227
FUT35g	100		GLYtp	100	5.61557e-12		FTHFCL	99.8249	1.19593		ONPTHLte	95.5118	9.49467		FPGS2m	98.132	6.63227
FUT910g	100		GNDer	100	5.61557e-12		FTHFDH	99.8249	1.19593		OPAHir	95.5118	9.49467		FPGS3	98.132	6.63227
FUT911g	100		GNMT	100	5.61557e-12		FTHFL	99.8249	1.19593		ORETNtn	95.5118	9.49467		FPGS3m	98.132	6.63227
FUT91g	100		GP1CALPHAte	100	5.61557e-12		FTHFLm	99.8249	1.19593		ORETNtn2	95.5118	9.49467		FPGS4	98.132	6.63227
FUT92g	100		GP1CALPHAtg	100	5.61557e-12		FUC13GALACGLCGAL14ACGLCGALGLUSIDEte	99.8249	1.19593		ORNDC	95.5118	9.49467		FPGS4m	98.132	6.63227
FUT93g	100		GP1Cte	100	5.61557e-12		FUC13GALACGLCGAL14ACGLCGALGLUSIDEtg	99.8249	1.19593		ORNt3m	95.5118	9.49467		FPGS5	98.132	6.63227
FUT94g	100		GP1Ctg	100	5.61557e-12		FUC14GALACGLCGALGLUSIDEte	99.8249	1.19593		ORNtiDF	95.5118	9.49467		FPGS5m	98.132	6.63227
FUT95g	100		GPAMm_hs	100	5.61557e-12		FUC14GALACGLCGALGLUSIDEtg	99.8249	1.19593		OXAHCOtex	95.5118	9.49467		FPGS6	98.132	6.63227
FUT96g	100		GPIAT	100	5.61557e-12		FUCACGALFUCGALACGLCGALGLUSIDEte	99.8249	1.19593		OXAtp	95.5118	9.49467		FPGS6m	98.132	6.63227
FUT97g	100		GPIMTer_L	100	5.61557e-12		FUCACGALFUCGALACGLCGALGLUSIDEtg	99.8249	1.19593		P45027A11m	95.5118	9.49467		FPGS7	98.132	6.63227
FUT98g	100		GPIMTer_U	100	5.61557e-12		FUCACNGAL14ACGLCGALGLUSIDEte	99.8249	1.19593		P45027A12m	95.5118	9.49467		FPGS7m	98.132	6.63227
FUT99g	100		GQ1BALPHAte	100	5.61557e-12		FUCACNGAL14ACGLCGALGLUSIDEtg	99.8249	1.19593		P45027A13m	95.5118	9.49467		FPGS8	98.132	6.63227
G12MT1_L	100		GQ1BALPHAtg	100	5.61557e-12		FUCACNGALACGLCGALGLUSIDEte	99.8249	1.19593		P45027A14m	95.5118	9.49467		FPGS8m	98.132	6.63227
G12MT1_U	100		GQ1Bte	100	5.61557e-12		FUCACNGALACGLCGALGLUSIDEtg	99.8249	1.19593		P45027A15m	95.5118	9.49467		FPGS9	98.132	6.63227
G12MT2_L	100		GQ1Btg	100	5.61557e-12		FUCASE2e	99.8249	1.19593		P45027A16m	95.5118	9.49467		FPGS9m	98.132	6.63227
G12MT2_U	100		GRTT	100	5.61557e-12		FUCASE2ly	99.8249	1.19593		P4502A6	95.5118	9.49467		FPGSm	98.132	6.63227
G13MT_L	100		GSNt4	100	5.61557e-12		FUCASEe	99.8249	1.19593		P4502D6	95.5118	9.49467		FRDPtc	98.132	6.63227
G13MT_U	100		GSNt5	100	5.61557e-12		FUCASEly	99.8249	1.19593		P4502E1	95.5118	9.49467		FRDPtr	98.132	6.63227
G14T10g	100		GSNtl	100	5.61557e-12		FUCFUC12GAL14ACGLCGALGLUSIDEte	99.8249	1.19593		P4502F1	95.5118	9.49467		FRTT	98.132	6.63227
G14T11g	100		GT1Ate	100	5.61557e-12		FUCFUC12GAL14ACGLCGALGLUSIDEtg	99.8249	1.19593		P4503A5	95.5118	9.49467		FRUt1r	98.132	6.63227
G14T12g	100		GT1Atg	100	5.61557e-12		FUCFUC132GALACGLCGAL14ACGLCGALGLUSIDEte	99.8249	1.19593		P4504F122r	95.5118	9.49467		FRUt4	98.132	6.63227
G14T13g	100		GTHPe	100	5.61557e-12		FUCFUC132GALACGLCGAL14ACGLCGALGLUSIDEtg	99.8249	1.19593		P4507B11r	95.5118	9.49467		FT	98.132	6.63227
G14T14g	100		GTHRDt	100	5.61557e-12		FUCFUCFUCGALACGLC13GALACGLCGAL14ACGLCGALGLUSIDEte	99.8249	1.19593		P4507B12r	95.5118	9.49467		FTHFCL	98.132	6.63227
G14T15g	100		GTPCIn	100	5.61557e-12		FUCFUCFUCGALACGLC13GALACGLCGAL14ACGLCGALGLUSIDEtg	99.8249	1.19593		P450SCC1m	95.5118	9.49467		FTHFDH	98.132	6.63227
G14T16g	100		GULLACter	100	5.61557e-12		FUCFUCFUCGALACGLCGAL14ACGLCGALGLUSIDEte	99.8249	1.19593		P5CDm	95.5118	9.49467		FTHFL	98.132	6.63227
G14T17g	100		H2CO3D2m	100	5.61557e-12		FUCFUCFUCGALACGLCGAL14ACGLCGALGLUSIDEtg	99.8249	1.19593		P5CR	95.5118	9.49467		FTHFLm	98.132	6.63227
G14T18g	100		H2ETer	100	5.61557e-12		FUCFUCGALACGLCGALGLUSIDEte	99.8249	1.19593		PA_HSter	95.5118	9.49467		FUC13GALACGLCGAL14ACGLCGALGLUSIDEte	98.132	6.63227
G14T19g	100		H2MTer_L	100	5.61557e-12		FUCFUCGALACGLCGALGLUSIDEtg	99.8249	1.19593		PA_HStg	95.5118	9.49467		FUC13GALACGLCGAL14ACGLCGALGLUSIDEtg	98.132	6.63227
G14T20g	100		H2MTer_U	100	5.61557e-12		FUCGAL14ACGLCGALGLUSIDEte	99.8249	1.19593		PA_HStn	95.5118	9.49467		FUC14GALACGLCGALGLUSIDEte	98.132	6.63227
G14T21g	100		H2Ot	100	5.61557e-12		FUCGAL14ACGLCGALGLUSIDEtg	99.8249	1.19593		PAFH	95.5118	9.49467		FUC14GALACGLCGALGLUSIDEtg	98.132	6.63227
G14T2g	100		H3ETer	100	5.61557e-12		FUCGALFUCGALACGLCGALGLUSIDEte	99.8249	1.19593		PAFHe	95.5118	9.49467		FUCACGALFUCGALACGLCGALGLUSIDEte	98.132	6.63227
G14T3g	100		H3MTer_L	100	5.61557e-12		FUCGALFUCGALACGLCGALGLUSIDEtg	99.8249	1.19593		PAFS	95.5118	9.49467		FUCACGALFUCGALACGLCGALGLUSIDEtg	98.132	6.63227
G14T4g	100		H3MTer_U	100	5.61557e-12		FUCGALGBSIDEte	99.8249	1.19593		PCFLOPm	95.5118	9.49467		FUCACNGAL14ACGLCGALGLUSIDEte	98.132	6.63227
G14T5g	100		H4ETer	100	5.61557e-12		FUCGALGBSIDEtg	99.8249	1.19593		PCHOL_HStg	95.5118	9.49467		FUCACNGAL14ACGLCGALGLUSIDEtg	98.132	6.63227
G14T6g	100		H5MTer_L	100	5.61557e-12		FUCtly	99.8249	1.19593		PCHOLP_hs	95.5118	9.49467		FUCACNGALACGLCGALGLUSIDEte	98.132	6.63227
G14T7g	100		H5MTer_U	100	5.61557e-12		FUM	99.8249	1.19593		PCHOLPg_hs	95.5118	9.49467		FUCACNGALACGLCGALGLUSIDEtg	98.132	6.63227
G14T8g	100		H6'ET2er	100	5.61557e-12		FUMAC	99.8249	1.19593		PCHOLPr_hs	95.5118	9.49467		FUCASE2e	98.132	6.63227
G14T9g	100		H6'ETer	100	5.61557e-12		FUMm	99.8249	1.19593		PCLYSOX	95.5118	9.49467		FUCASE2ly	98.132	6.63227
G14Tg	100		H6MTer_L	100	5.61557e-12		FUMSO3tm	99.8249	1.19593		PCm	95.5118	9.49467		FUCASEe	98.132	6.63227
G16MT_L	100		H6MTer_U	100	5.61557e-12		FUMSO4tm	99.8249	1.19593		PCREATtmdiffir	95.5118	9.49467		FUCASEly	98.132	6.63227
G16MT_U	100		H7'ETer	100	5.61557e-12		FUMtm	99.8249	1.19593		PDE1	95.5118	9.49467		FUCFUC12GAL14ACGLCGALGLUSIDEte	98.132	6.63227
G1M6MASNB1terg	100		H7'TAer	100	5.61557e-12		FUMTSULtm	99.8249	1.19593		PDE1g	95.5118	9.49467		FUCFUC12GAL14ACGLCGALGLUSIDEtg	98.132	6.63227
G1M7MASNBterg	100		H7ET2er	100	5.61557e-12		FUT11g	99.8249	1.19593		PDE4	95.5118	9.49467		FUCFUC132GALACGLCGAL14ACGLCGALGLUSIDEte	98.132	6.63227
G1M7MASNCterg	100		H7MTer_L	100	5.61557e-12		FUT12g	99.8249	1.19593		PDE4g	95.5118	9.49467		FUCFUC132GALACGLCGAL14ACGLCGALGLUSIDEtg	98.132	6.63227
G1M8MASNterg	100		H7MTer_U	100	5.61557e-12		FUT14g	99.8249	1.19593		PDE4n	95.5118	9.49467		FUCFUCFUCGALACGLC13GALACGLCGAL14ACGLCGALGLUSIDEte	98.132	6.63227
G2M8MASNterg	100		H8MTer_L	100	5.61557e-12		FUT15g	99.8249	1.19593		PDHm	95.5118	9.49467		FUCFUCFUCGALACGLC13GALACGLCGAL14ACGLCGALGLUSIDEtg	98.132	6.63227
G3M8MASNterg	100		H8MTer_U	100	5.61557e-12		FUT16g	99.8249	1.19593		PDXPP	95.5118	9.49467		FUCFUCFUCGALACGLCGAL14ACGLCGALGLUSIDEte	98.132	6.63227
G3PD1	100		H8TAer	100	5.61557e-12		FUT17g	99.8249	1.19593		PE_HStg	95.5118	9.49467		FUCFUCFUCGALACGLCGAL14ACGLCGALGLUSIDEtg	98.132	6.63227
G3PD2m	100		HACD1m	100	5.61557e-12		FUT18g	99.8249	1.19593		PEAMNO	95.5118	9.49467		FUCFUCGALACGLCGALGLUSIDEte	98.132	6.63227
G5SADrm	100		HACD1x	100	5.61557e-12		FUT31g	99.8249	1.19593		PEFLIP	95.5118	9.49467		FUCFUCGALACGLCGALGLUSIDEtg	98.132	6.63227
G5SADs	100		HBZOPT10m	100	5.61557e-12		FUT32g	99.8249	1.19593		PEFLIPm	95.5118	9.49467		FUCGAL14ACGLCGALGLUSIDEte	98.132	6.63227
G5SDym	100		HCO3_CLt	100	5.61557e-12		FUT33g	99.8249	1.19593		PEPLYStn	95.5118	9.49467		FUCGAL14ACGLCGALGLUSIDEtg	98.132	6.63227
G6PDA	100		HCO3_NAt	100	5.61557e-12		FUT34g	99.8249	1.19593		PETHCT	95.5118	9.49467		FUCGALFUCGALACGLCGALGLUSIDEte	98.132	6.63227
G6PDH1er	100		HCOUMARINte	100	5.61557e-12		FUT35g	99.8249	1.19593		PFK	95.5118	9.49467		FUCGALFUCGALACGLCGALGLUSIDEtg	98.132	6.63227
G6PDH1rer	100		HDCAtr	100	5.61557e-12		FUT910g	99.8249	1.19593		PFK26	95.5118	9.49467		FUCGALGBSIDEte	98.132	6.63227
G6PDH2r	100		HEX10	100	5.61557e-12		FUT911g	99.8249	1.19593		PGDIr	95.5118	9.49467		FUCGALGBSIDEtg	98.132	6.63227
G6PDH2rer	100		HEXCCPT1	100	5.61557e-12		FUT91g	99.8249	1.19593		PGESr	95.5118	9.49467		FUCtly	98.132	6.63227
G6PPer	100		HEXCCPT2	100	5.61557e-12		FUT92g	99.8249	1.19593		PGISr	95.5118	9.49467		FUM	98.132	6.63227
G6Pter	100		HEXCCRNt	100	5.61557e-12		FUT93g	99.8249	1.19593		PGLer	95.5118	9.49467		FUMAC	98.132	6.63227
GABAVESSEC	100		HISt4	100	5.61557e-12		FUT94g	99.8249	1.19593		PGLYCt	95.5118	9.49467		FUMm	98.132	6.63227
GACMTRc	100		HISTASE	100	5.61557e-12		FUT95g	99.8249	1.19593		PHCDm	95.5118	9.49467		FUMSO3tm	98.132	6.63227
GACPAILter	100		HIStiDF	100	5.61557e-12		FUT96g	99.8249	1.19593		PHEMEt	95.5118	9.49467		FUMSO4tm	98.132	6.63227
GALACGLCGALGBSIDEte	100		HKYNH	100	5.61557e-12		FUT97g	99.8249	1.19593		PHEMEtm	95.5118	9.49467		FUMtm	98.132	6.63227
GALASE10ly	100		HMBS	100	5.61557e-12		FUT98g	99.8249	1.19593		PHEt4	95.5118	9.49467		FUMTSULtm	98.132	6.63227
GALASE11ly	100		HMGCOARr	100	5.61557e-12		FUT99g	99.8249	1.19593		PHETA1	95.5118	9.49467		FUT11g	98.132	6.63227
GALASE12ly	100		HOMt4	100	5.61557e-12		G12MT1_L	99.8249	1.19593		PHETA1m	95.5118	9.49467		FUT12g	98.132	6.63227
GALASE13ly	100		HOXG	100	5.61557e-12		G12MT1_U	99.8249	1.19593		PHYCBOXL	95.5118	9.49467		FUT14g	98.132	6.63227
GALASE14ly	100		HPDCACRNCPT1	100	5.61557e-12		G12MT2_L	99.8249	1.19593		PHYHx	95.5118	9.49467		FUT15g	98.132	6.63227
GALASE15ly	100		HPDCACRNCPT2	100	5.61557e-12		G12MT2_U	99.8249	1.19593		PHYQt	95.5118	9.49467		FUT16g	98.132	6.63227
GALASE16ly	100		HPDCACRNt	100	5.61557e-12		G13MT_L	99.8249	1.19593		PHYTt	95.5118	9.49467		FUT17g	98.132	6.63227
GALASE17ly	100		HPDCAt	100	5.61557e-12		G13MT_U	99.8249	1.19593		PI34P5K	95.5118	9.49467		FUT18g	98.132	6.63227
GALASE18ly	100		HPROxm	100	5.61557e-12		G14T10g	99.8249	1.19593		PI3P3Pn	95.5118	9.49467		FUT31g	98.132	6.63227
GALASE19ly	100		HPYRR2x	100	5.61557e-12		G14T11g	99.8249	1.19593		PI3P4Kn	95.5118	9.49467		FUT32g	98.132	6.63227
GALASE1ly	100		HPYRRy	100	5.61557e-12		G14T12g	99.8249	1.19593		PI3P5K	95.5118	9.49467		FUT33g	98.132	6.63227
GALASE20ly	100		HPYRtp	100	5.61557e-12		G14T13g	99.8249	1.19593		PI3PP	95.5118	9.49467		FUT34g	98.132	6.63227
GALASE3ly	100		HS1ly	100	5.61557e-12		G14T14g	99.8249	1.19593		PI45P3K	95.5118	9.49467		FUT35g	98.132	6.63227
GALASE4ly	100		HS2ly	100	5.61557e-12		G14T15g	99.8249	1.19593		PI45P3Kn	95.5118	9.49467		FUT910g	98.132	6.63227
GALASE5ly	100		HS3ly	100	5.61557e-12		G14T16g	99.8249	1.19593		PI45P4P	95.5118	9.49467		FUT911g	98.132	6.63227
GALASE6ly	100		HS4ly	100	5.61557e-12		G14T17g	99.8249	1.19593		PI45P5P	95.5118	9.49467		FUT91g	98.132	6.63227
GALASE7ly	100		HSAT1ly	100	5.61557e-12		G14T18g	99.8249	1.19593		PI45P5Pn	95.5118	9.49467		FUT92g	98.132	6.63227
GALASE8ly	100		HSAT2ly	100	5.61557e-12		G14T19g	99.8249	1.19593		PI4P3K	95.5118	9.49467		FUT93g	98.132	6.63227
GALASE9ly	100		HSAT3ly	100	5.61557e-12		G14T20g	99.8249	1.19593		PI4P3Kn	95.5118	9.49467		FUT94g	98.132	6.63227
GALC	100		HSAT4ly	100	5.61557e-12		G14T21g	99.8249	1.19593		PI4P5K	95.5118	9.49467		FUT95g	98.132	6.63227
GALFUC12GAL14ACGLCGALGLUSIDEte	100		HSD11B1r	100	5.61557e-12		G14T2g	99.8249	1.19593		PI4P5Kn	95.5118	9.49467		FUT96g	98.132	6.63227
GALFUC12GAL14ACGLCGALGLUSIDEtg	100		HSD11B2r	100	5.61557e-12		G14T3g	99.8249	1.19593		PI4PLC	95.5118	9.49467		FUT97g	98.132	6.63227
GALFUCGALACGLCGAL14ACGLCGALGLUSIDEte	100		HSD17B2r	100	5.61557e-12		G14T4g	99.8249	1.19593		PI4PP	95.5118	9.49467		FUT98g	98.132	6.63227
GALFUCGALACGLCGAL14ACGLCGALGLUSIDEtg	100		HSD17B3r	100	5.61557e-12		G14T5g	99.8249	1.19593		PI5P3K	95.5118	9.49467		FUT99g	98.132	6.63227
GALGALFUCFUCGALACGLCGALACGLCGAL14ACGLCGALGLUSIDEte	100		HSD17B42x	100	5.61557e-12		G14T6g	99.8249	1.19593		PI5P4Kn	95.5118	9.49467		G12MT1_L	98.132	6.63227
GALGALFUCFUCGALACGLCGALACGLCGAL14ACGLCGALGLUSIDEtg	100		HSD17B4x	100	5.61557e-12		G14T7g	99.8249	1.19593		PIACGT	95.5118	9.49467		G12MT1_U	98.132	6.63227
GALGALGALTHCRMte	100		HSD17B7r	100	5.61557e-12		G14T8g	99.8249	1.19593		PIK3er	95.5118	9.49467		G12MT2_L	98.132	6.63227
GALGLUSIDEtg	100		HSD17B8r	100	5.61557e-12		G14T9g	99.8249	1.19593		PIK3n	95.5118	9.49467		G12MT2_U	98.132	6.63227
GALGLUSIDEtl	100		HSD3A1r	100	5.61557e-12		G14Tg	99.8249	1.19593		PIK4	95.5118	9.49467		G13MT_L	98.132	6.63227
GALK	100		HSD3A2r	100	5.61557e-12		G16MT_L	99.8249	1.19593		PIK4n	95.5118	9.49467		G13MT_U	98.132	6.63227
GALNACT1g	100		HSD3B11r	100	5.61557e-12		G16MT_U	99.8249	1.19593		PIK5	95.5118	9.49467		G14T10g	98.132	6.63227
GALNACT2g	100		HSD3B12r	100	5.61557e-12		G1M6MASNB1terg	99.8249	1.19593		PIK5n	95.5118	9.49467		G14T11g	98.132	6.63227
GALNACT3g	100		HSD3B13	100	5.61557e-12		G1M7MASNBterg	99.8249	1.19593		PIPLC	95.5118	9.49467		G14T12g	98.132	6.63227
GALNACT4g	100		HSD3B13r	100	5.61557e-12		G1M7MASNCterg	99.8249	1.19593		PIt2m	95.5118	9.49467		G14T13g	98.132	6.63227
GALNACT5g	100		HSD3B7	100	5.61557e-12		G1M8MASNterg	99.8249	1.19593		PIt7	95.5118	9.49467		G14T14g	98.132	6.63227
GALNTg	100		HSD3B7P	100	5.61557e-12		G2M8MASNterg	99.8249	1.19593		PIt7ir	95.5118	9.49467		G14T15g	98.132	6.63227
GALOR	100		HSPASEly	100	5.61557e-12		G3M8MASNterg	99.8249	1.19593		PIt8	95.5118	9.49467		G14T16g	98.132	6.63227
GALSIDEtl	100		HSPGt	100	5.61557e-12		G3PD1	99.8249	1.19593		PItg	95.5118	9.49467		G14T17g	98.132	6.63227
GALT	100		HSPGtly	100	5.61557e-12		G3PD2m	99.8249	1.19593		PLA2	95.5118	9.49467		G14T18g	98.132	6.63227
GALt1r	100		HXANtl	100	5.61557e-12		G5SADs	99.8249	1.19593		PLA2_2	95.5118	9.49467		G14T19g	98.132	6.63227
GALt2_2	100		HXANtx	100	5.61557e-12		G5SDym	99.8249	1.19593		PLYSPSer	95.5118	9.49467		G14T20g	98.132	6.63227
GALT2g	100		ICDHxm	100	5.61557e-12		G6PDA	99.8249	1.19593		PNTKm	95.5118	9.49467		G14T21g	98.132	6.63227
GALt4	100		ICDHyp	100	5.61557e-12		G6PDH1er	99.8249	1.19593		PNTOt5	95.5118	9.49467		G14T2g	98.132	6.63227
GALt4_2	100		IDOAASE1ly	100	5.61557e-12		G6PDH1rer	99.8249	1.19593		PPA	95.5118	9.49467		G14T3g	98.132	6.63227
GALTg	100		IDOAASE2ly	100	5.61557e-12		G6PDH2r	99.8249	1.19593		PPA2m	95.5118	9.49467		G14T4g	98.132	6.63227
GALtly	100		IDOAASE3ly	100	5.61557e-12		G6PDH2rer	99.8249	1.19593		PPAer	95.5118	9.49467		G14T5g	98.132	6.63227
GALU	100		IDOAASE4ly	100	5.61557e-12		G6PPer	99.8249	1.19593		PPAP	95.5118	9.49467		G14T6g	98.132	6.63227
GAMt1r	100		IDOURtly	100	5.61557e-12		G6Pter	99.8249	1.19593		PPAt	95.5118	9.49467		G14T7g	98.132	6.63227
GAMYe	100		IDPtn	100	5.61557e-12		GABAVESSEC	99.8249	1.19593		PPAtm	95.5118	9.49467		G14T8g	98.132	6.63227
GAO1	100		ILEt4	100	5.61557e-12		GACPAILter	99.8249	1.19593		PPCOAOm	95.5118	9.49467		G14T9g	98.132	6.63227
GAO1g	100		ILETA	100	5.61557e-12		GALACGLCGALGBSIDEte	99.8249	1.19593		PPPItn	95.5118	9.49467		G14Tg	98.132	6.63227
GAO2	100		IMACTD	100	5.61557e-12		GALASE10ly	99.8249	1.19593		PRDXl	95.5118	9.49467		G16MT_L	98.132	6.63227
GAO2g	100		IMACTD_m	100	5.61557e-12		GALASE11ly	99.8249	1.19593		PRGNLONESULT	95.5118	9.49467		G16MT_U	98.132	6.63227
GAPD	100		INSt4	100	5.61557e-12		GALASE12ly	99.8249	1.19593		PRGNLONEtm	95.5118	9.49467		G1M6MASNB1terg	98.132	6.63227
GASNASE2ly	100		INSt5	100	5.61557e-12		GALASE13ly	99.8249	1.19593		PRGNLONEtr	95.5118	9.49467		G1M7MASNBterg	98.132	6.63227
GASNASE3ly	100		INStl	100	5.61557e-12		GALASE14ly	99.8249	1.19593		PRISTCOAtx	95.5118	9.49467		G1M7MASNCterg	98.132	6.63227
GASNASEly	100		INStm	100	5.61557e-12		GALASE15ly	99.8249	1.19593		PRISTtx	95.5118	9.49467		G1M8MASNterg	98.132	6.63227
GBA	100		INSTt2r	100	5.61557e-12		GALASE16ly	99.8249	1.19593		PROAKGOX1r	95.5118	9.49467		G2M8MASNterg	98.132	6.63227
GBAl	100		INSTt4	100	5.61557e-12		GALASE17ly	99.8249	1.19593		PRODt2r	95.5118	9.49467		G3M8MASNterg	98.132	6.63227
GBGT1	100		INSTt4_2	100	5.61557e-12		GALASE18ly	99.8249	1.19593		PRODt2rL	95.5118	9.49467		G3PD1	98.132	6.63227
GBSIDEte	100		IPDPtr	100	5.61557e-12		GALASE19ly	99.8249	1.19593		PROSTGE1t	95.5118	9.49467		G3PD2m	98.132	6.63227
GBSIDEtl	100		It	100	5.61557e-12		GALASE1ly	99.8249	1.19593		PROSTGE1t3	95.5118	9.49467		G5SADs	98.132	6.63227
GCALDD	100		ITCOAL1m	100	5.61557e-12		GALASE20ly	99.8249	1.19593		PROSTGE2t3	95.5118	9.49467		G5SDym	98.132	6.63227
GCALDDm	100		ITCOALm	100	5.61557e-12		GALASE3ly	99.8249	1.19593		PROSTGH2t	95.5118	9.49467		G6PDA	98.132	6.63227
GCC2am	100		ITPtn	100	5.61557e-12		GALASE4ly	99.8249	1.19593		PROSTGI2t	95.5118	9.49467		G6PDH1er	98.132	6.63227
GCC2bim	100		KCC2t	100	5.61557e-12		GALASE5ly	99.8249	1.19593		PROSTGI2tr	95.5118	9.49467		G6PDH1rer	98.132	6.63227
GCC2cm	100		KCCt	100	5.61557e-12		GALASE6ly	99.8249	1.19593		PROt2r	95.5118	9.49467		G6PDH2r	98.132	6.63227
GCCam	100		KHK2	100	5.61557e-12		GALASE7ly	99.8249	1.19593		PROt2rL	95.5118	9.49467		G6PDH2rer	98.132	6.63227
GCCbim	100		KHK3	100	5.61557e-12		GALASE8ly	99.8249	1.19593		PROt4	95.5118	9.49467		G6PPer	98.132	6.63227
GCCcm	100		KSII_CORE4t	100	5.61557e-12		GALASE9ly	99.8249	1.19593		PROt4(2)r	95.5118	9.49467		G6Pter	98.132	6.63227
GCHOLAt	100		KSII_CORE4tly	100	5.61557e-12		GALC	99.8249	1.19593		PRPNCOAHYDm	95.5118	9.49467		GABAVESSEC	98.132	6.63227
GCHOLAt2	100		KSItly	100	5.61557e-12		GALFUC12GAL14ACGLCGALGLUSIDEte	99.8249	1.19593		PRPNCOAHYDx	95.5118	9.49467		GACPAILter	98.132	6.63227
GCHOLAt3	100		Kt3g	100	5.61557e-12		GALFUC12GAL14ACGLCGALGLUSIDEtg	99.8249	1.19593		PS_HSter	95.5118	9.49467		GALACGLCGALGBSIDEte	98.132	6.63227
GCHOLAte	100		KYN	100	5.61557e-12		GALFUCGALACGLCGAL14ACGLCGALGLUSIDEte	99.8249	1.19593		PS_HStg	95.5118	9.49467		GALASE10ly	98.132	6.63227
GCHOLAtx	100		KYN3OX	100	5.61557e-12		GALFUCGALACGLCGAL14ACGLCGALGLUSIDEtg	99.8249	1.19593		PSFLIP	95.5118	9.49467		GALASE11ly	98.132	6.63227
GCNTg	100		KYNAKGAT	100	5.61557e-12		GALGALFUCFUCGALACGLCGALACGLCGAL14ACGLCGALGLUSIDEte	99.8249	1.19593		PSSA2_hs	95.5118	9.49467		GALASE12ly	98.132	6.63227
GD1B2te	100		L-LACt2r	100	5.61557e-12		GALGALFUCFUCGALACGLCGALACGLCGAL14ACGLCGALGLUSIDEtg	99.8249	1.19593		PTDCACRNCPT1	95.5118	9.49467		GALASE13ly	98.132	6.63227
GD1B2tg	100		L-LACt4r	100	5.61557e-12		GALGALGALTHCRMte	99.8249	1.19593		PTDCACRNCPT2	95.5118	9.49467		GALASE14ly	98.132	6.63227
GD1Cte	100		L-LACtcm	100	5.61557e-12		GALGLUSIDEtg	99.8249	1.19593		PTDCACRNt	95.5118	9.49467		GALASE15ly	98.132	6.63227
GD1Ctg	100		L-LACtm	100	5.61557e-12		GALGLUSIDEtl	99.8249	1.19593		PTDCAt	95.5118	9.49467		GALASE16ly	98.132	6.63227
GDCHOLAte	100		LACZly	100	5.61557e-12		GALK	99.8249	1.19593		PTE2x	95.5118	9.49467		GALASE17ly	98.132	6.63227
GDPFUCtg	100		LALDD	100	5.61557e-12		GALNACT1g	99.8249	1.19593		PTE4x	95.5118	9.49467		GALASE18ly	98.132	6.63227
GDPtg	100		LALDO2	100	5.61557e-12		GALNACT2g	99.8249	1.19593		PTE5x	95.5118	9.49467		GALASE19ly	98.132	6.63227
GF6PTA	100		LALDO2x	100	5.61557e-12		GALNACT3g	99.8249	1.19593		PTHPSn	95.5118	9.49467		GALASE1ly	98.132	6.63227
GFUCS	100		LAPCOAl	100	5.61557e-12		GALNACT4g	99.8249	1.19593		PTRCOX1	95.5118	9.49467		GALASE20ly	98.132	6.63227
GGH-10FTHF5GLUe	100		LCADi_Dm	100	5.61557e-12		GALNACT5g	99.8249	1.19593		PYAM5Ptm	95.5118	9.49467		GALASE3ly	98.132	6.63227
GGH-10FTHF5GLUl	100		LCADim	100	5.61557e-12		GALNTg	99.8249	1.19593		PYDAMK	95.5118	9.49467		GALASE4ly	98.132	6.63227
GGH-10FTHF6GLUe	100		LCYSTAT	100	5.61557e-12		GALOR	99.8249	1.19593		PYDX5Ptm	95.5118	9.49467		GALASE5ly	98.132	6.63227
GGH-10FTHF6GLUl	100		LCYSTATm	100	5.61557e-12		GALSIDEtl	99.8249	1.19593		PYDXK	95.5118	9.49467		GALASE6ly	98.132	6.63227
GGH-10FTHF7GLUe	100		LDH_Lm	100	5.61557e-12		GALT	99.8249	1.19593		PYDXNK	95.5118	9.49467		GALASE7ly	98.132	6.63227
GGH-10FTHF7GLUl	100		LEUKTRB4tr	100	5.61557e-12		GALt1r	99.8249	1.19593		PYLALDOX	95.5118	9.49467		GALASE8ly	98.132	6.63227
GGH-5DHFe	100		LEUt4	100	5.61557e-12		GALt2_2	99.8249	1.19593		PYLALDOXm	95.5118	9.49467		GALASE9ly	98.132	6.63227
GGH-5DHFl	100		LEUTA	100	5.61557e-12		GALT2g	99.8249	1.19593		PYRt2p	95.5118	9.49467		GALC	98.132	6.63227
GGH-5THFe	100		LFORKYNHYD	100	5.61557e-12		GALt4	99.8249	1.19593		QUILSYN	95.5118	9.49467		GALFUC12GAL14ACGLCGALGLUSIDEte	98.132	6.63227
GGH-5THFl	100		LGNCCPT1	100	5.61557e-12		GALt4_2	99.8249	1.19593		RADH	95.5118	9.49467		GALFUC12GAL14ACGLCGALGLUSIDEtg	98.132	6.63227
GGH-6DHFe	100		LGNCCPT2	100	5.61557e-12		GALTg	99.8249	1.19593		RADH3	95.5118	9.49467		GALFUCGALACGLCGAL14ACGLCGALGLUSIDEte	98.132	6.63227
GGH-6DHFl	100		LGNCCRNt	100	5.61557e-12		GALtly	99.8249	1.19593		RAtn	95.5118	9.49467		GALFUCGALACGLCGAL14ACGLCGALGLUSIDEtg	98.132	6.63227
GGH-6THFe	100		LGNCt	100	5.61557e-12		GALU	99.8249	1.19593		RAtn3	95.5118	9.49467		GALGALFUCFUCGALACGLCGALACGLCGAL14ACGLCGALGLUSIDEte	98.132	6.63227
GGH-6THFl	100		LGTHL	100	5.61557e-12		GAMt1r	99.8249	1.19593		RBFK	95.5118	9.49467		GALGALFUCFUCGALACGLCGALACGLCGAL14ACGLCGALGLUSIDEtg	98.132	6.63227
GGH-7DHFe	100		LINKDEG1ly	100	5.61557e-12		GAMYe	99.8249	1.19593		RDH1	95.5118	9.49467		GALGALGALTHCRMte	98.132	6.63227
GGH-7DHFl	100		LIPOti	100	5.61557e-12		GAO1	99.8249	1.19593		RDH2	95.5118	9.49467		GALGLUSIDEtg	98.132	6.63227
GGH-7THFe	100		LNELDCCPT1	100	5.61557e-12		GAO1g	99.8249	1.19593		RDH3	95.5118	9.49467		GALGLUSIDEtl	98.132	6.63227
GGH-7THFl	100		LNELDCCPT2	100	5.61557e-12		GAO2	99.8249	1.19593		RETH1	95.5118	9.49467		GALK	98.132	6.63227
GGLUCT	100		LNELDCCRNt	100	5.61557e-12		GAO2g	99.8249	1.19593		RETH2	95.5118	9.49467		GALNACT1g	98.132	6.63227
GGNG	100		LNLCCPT1	100	5.61557e-12		GAPD	99.8249	1.19593		RETNCOA	95.5118	9.49467		GALNACT2g	98.132	6.63227
GGT_L	100		LNLCCPT2	100	5.61557e-12		GASNASE2ly	99.8249	1.19593		RIBFLVt3	95.5118	9.49467		GALNACT3g	98.132	6.63227
GGT_U	100		LNLCCRNt	100	5.61557e-12		GASNASE3ly	99.8249	1.19593		RIBt	95.5118	9.49467		GALNACT4g	98.132	6.63227
GGT5r	100		LNLCt	100	5.61557e-12		GASNASEly	99.8249	1.19593		RIBt2	95.5118	9.49467		GALNACT5g	98.132	6.63227
GGT6	100		LNLNCACPT1	100	5.61557e-12		GBA	99.8249	1.19593		RNDR2	95.5118	9.49467		GALNTg	98.132	6.63227
GHMT2r	100		LNLNCACPT2	100	5.61557e-12		GBAl	99.8249	1.19593		RNMK	95.5118	9.49467		GALOR	98.132	6.63227
GHMT2rm	100		LNLNCACRNt	100	5.61557e-12		GBGT1	99.8249	1.19593		RTOT4	95.5118	9.49467		GALSIDEtl	98.132	6.63227
GHMT3	100		LNLNCAt	100	5.61557e-12		GBSIDEte	99.8249	1.19593		RTOT6	95.5118	9.49467		GALT	98.132	6.63227
GHMT3m	100		LNLNCGCPT1	100	5.61557e-12		GBSIDEtl	99.8249	1.19593		RTOTAL2CRNCPT1	95.5118	9.49467		GALt1r	98.132	6.63227
GK1m	100		LNLNCGCPT2	100	5.61557e-12		GCALDD	99.8249	1.19593		RTOTAL2CRNCPT2	95.5118	9.49467		GALt2_2	98.132	6.63227
GLACO	100		LNLNCGCRNt	100	5.61557e-12		GCALDDm	99.8249	1.19593		RTOTAL2CRNt	95.5118	9.49467		GALT2g	98.132	6.63227
GLACOm	100		LNLNCGt	100	5.61557e-12		GCC2am	99.8249	1.19593		RTOTAL3CRNCPT1	95.5118	9.49467		GALt4	98.132	6.63227
GLACter	100		LPCOXp	100	5.61557e-12		GCC2bim	99.8249	1.19593		RTOTAL3CRNCPT2	95.5118	9.49467		GALt4_2	98.132	6.63227
GLAl	100		LPS2	100	5.61557e-12		GCC2cm	99.8249	1.19593		RTOTAL3CRNt	95.5118	9.49467		GALTg	98.132	6.63227
GLB1	100		LPS2e	100	5.61557e-12		GCCam	99.8249	1.19593		RTOTALCRNCPT1	95.5118	9.49467		GALtly	98.132	6.63227
GLBRAN	100		LS3	100	5.61557e-12		GCCbim	99.8249	1.19593		RTOTALCRNCPT2	95.5118	9.49467		GALU	98.132	6.63227
GLCAASE1ly	100		LTDCL	100	5.61557e-12		GCCcm	99.8249	1.19593		RTOTALCRNt	95.5118	9.49467		GAMt1r	98.132	6.63227
GLCAASE4ly	100		LYSMTF1n	100	5.61557e-12		GCHOLAt	99.8249	1.19593		Rtotaltp	95.5118	9.49467		GAMYe	98.132	6.63227
GLCAASE5ly	100		LYSMTF2n	100	5.61557e-12		GCHOLAt2	99.8249	1.19593		S23T2g	95.5118	9.49467		GAO1	98.132	6.63227
GLCAASE6ly	100		LYSMTF3n	100	5.61557e-12		GCHOLAt3	99.8249	1.19593		S23T4g	95.5118	9.49467		GAO1g	98.132	6.63227
GLCAASE7ly	100		LYSt4	100	5.61557e-12		GCHOLAte	99.8249	1.19593		S2L2FN2M2MASNtly	95.5118	9.49467		GAO2	98.132	6.63227
GLCAASE8ly	100		LYStiDF	100	5.61557e-12		GCHOLAtx	99.8249	1.19593		S2L2N2M2MASNtly	95.5118	9.49467		GAO2g	98.132	6.63227
GLCAASE9ly	100		LYStip	100	5.61557e-12		GCNTg	99.8249	1.19593		S2T1g	95.5118	9.49467		GAPD	98.132	6.63227
GLCAE2g	100		M4ATAer	100	5.61557e-12		GD1B2te	99.8249	1.19593		S2T2g	95.5118	9.49467		GASNASE2ly	98.132	6.63227
GLCAT2g	100		M4BET2er	100	5.61557e-12		GD1B2tg	99.8249	1.19593		S2T3g	95.5118	9.49467		GASNASE3ly	98.132	6.63227
GLCAT3g	100		M4BTAer	100	5.61557e-12		GD1Cte	99.8249	1.19593		S2T4g	95.5118	9.49467		GASNASEly	98.132	6.63227
GLCAT4g	100		MACACI	100	5.61557e-12		GD1Ctg	99.8249	1.19593		S2TASE1ly	95.5118	9.49467		GBA	98.132	6.63227
GLCAT5g	100		MALSO3tm	100	5.61557e-12		GDCHOLAte	99.8249	1.19593		S2TASE2ly	95.5118	9.49467		GBAl	98.132	6.63227
GLCAT6g	100		MALSO4tm	100	5.61557e-12		GDPFUCtg	99.8249	1.19593		S2TASE3ly	95.5118	9.49467		GBGT1	98.132	6.63227
GLCAT7g	100		MALT	100	5.61557e-12		GDPtg	99.8249	1.19593		S3T1g	95.5118	9.49467		GBSIDEte	98.132	6.63227
GLCAT8g	100		MALTe	100	5.61557e-12		GF6PTA	99.8249	1.19593		S3T2g	95.5118	9.49467		GBSIDEtl	98.132	6.63227
GLCAT9g	100		MALTly	100	5.61557e-12		GFUCS	99.8249	1.19593		S3T3g	95.5118	9.49467		GCALDD	98.132	6.63227
GLCATg	100		MALtm	100	5.61557e-12		GGH-10FTHF5GLUe	99.8249	1.19593		S3TASE1ly	95.5118	9.49467		GCALDDm	98.132	6.63227
GLCMter	100		MALTSULtm	100	5.61557e-12		GGH-10FTHF5GLUl	99.8249	1.19593		S3TASE2ly	95.5118	9.49467		GCC2am	98.132	6.63227
GLCNACASE1ly	100		MAN1_6B1er	100	5.61557e-12		GGH-10FTHF6GLUe	99.8249	1.19593		S3TASE3ly	95.5118	9.49467		GCC2bim	98.132	6.63227
GLCNACASE2ly	100		MAN1_7Ber	100	5.61557e-12		GGH-10FTHF6GLUl	99.8249	1.19593		S4T1g	95.5118	9.49467		GCC2cm	98.132	6.63227
GLCNACASE3ly	100		MAN2_6B1er	100	5.61557e-12		GGH-10FTHF7GLUe	99.8249	1.19593		S4T2g	95.5118	9.49467		GCCam	98.132	6.63227
GLCNACASE4ly	100		MAN2_7Cer	100	5.61557e-12		GGH-10FTHF7GLUl	99.8249	1.19593		S4T3g	95.5118	9.49467		GCCbim	98.132	6.63227
GLCNACASE5ly	100		MANt1r	100	5.61557e-12		GGH-5DHFe	99.8249	1.19593		S4T4g	95.5118	9.49467		GCCcm	98.132	6.63227
GLCNACDASg	100		MANt4	100	5.61557e-12		GGH-5DHFl	99.8249	1.19593		S4T5g	95.5118	9.49467		GCHOLAt	98.132	6.63227
GLCNACPT_L	100		MAOX	100	5.61557e-12		GGH-5THFe	99.8249	1.19593		S4T6g	95.5118	9.49467		GCHOLAt2	98.132	6.63227
GLCNACPT_U	100		MCDp	100	5.61557e-12		GGH-5THFl	99.8249	1.19593		S4TASE1ly	95.5118	9.49467		GCHOLAt3	98.132	6.63227
GLCNACT_L	100		MCOATA	100	5.61557e-12		GGH-6DHFe	99.8249	1.19593		S4TASE2ly	95.5118	9.49467		GCHOLAte	98.132	6.63227
GLCNACT_U	100		MCOATAm	100	5.61557e-12		GGH-6DHFl	99.8249	1.19593		S4TASE3ly	95.5118	9.49467		GCHOLAtx	98.132	6.63227
GLCNACT1g	100		MECOALm	100	5.61557e-12		GGH-6THFe	99.8249	1.19593		S4TASE4ly	95.5118	9.49467		GCNTg	98.132	6.63227
GLCNACT2g	100		MECOAS1m	100	5.61557e-12		GGH-6THFl	99.8249	1.19593		S4TASE5ly	95.5118	9.49467		GD1B2te	98.132	6.63227
GLCNACT3g	100		MELATN23DOX	100	5.61557e-12		GGH-7DHFe	99.8249	1.19593		S6T16g	95.5118	9.49467		GD1B2tg	98.132	6.63227
GLCNACT4g	100		MELATNOX	100	5.61557e-12		GGH-7DHFl	99.8249	1.19593		S6T17g	95.5118	9.49467		GD1Cte	98.132	6.63227
GLCNACT5g	100		MEOHtr	100	5.61557e-12		GGH-7THFe	99.8249	1.19593		S6T18g	95.5118	9.49467		GD1Ctg	98.132	6.63227
GLCt1r	100		METLEUex	100	5.61557e-12		GGH-7THFl	99.8249	1.19593		S6T19g	95.5118	9.49467		GDCHOLAte	98.132	6.63227
GLCt2_2	100		METt4	100	5.61557e-12		GGLUCT	99.8249	1.19593		S6T1g	95.5118	9.49467		GDPFUCtg	98.132	6.63227
GLCt2r	100		MI1345PKn	100	5.61557e-12		GGNG	99.8249	1.19593		S6T20g	95.5118	9.49467		GDPtg	98.132	6.63227
GLCt4	100		MI1456PKn	100	5.61557e-12		GGT_L	99.8249	1.19593		S6T21g	95.5118	9.49467		GF6PTA	98.132	6.63227
GLCt4_2	100		MI145P6Kn	100	5.61557e-12		GGT_U	99.8249	1.19593		S6T22g	95.5118	9.49467		GFUCS	98.132	6.63227
GLCter	100		MI145PKn	100	5.61557e-12		GGT5r	99.8249	1.19593		S6T23g	95.5118	9.49467		GGH-10FTHF5GLUe	98.132	6.63227
GLCtg	100		MI14Ptn	100	5.61557e-12		GGT6	99.8249	1.19593		S6T24g	95.5118	9.49467		GGH-10FTHF5GLUl	98.132	6.63227
GLCtly	100		MI1P-Dtn	100	5.61557e-12		GHMT2rm	99.8249	1.19593		S6T25g	95.5118	9.49467		GGH-10FTHF6GLUe	98.132	6.63227
GLCURter	100		MI3456PK	100	5.61557e-12		GHMT3	99.8249	1.19593		S6T2g	95.5118	9.49467		GGH-10FTHF6GLUl	98.132	6.63227
GLCURtly	100		MLTG1	100	5.61557e-12		GHMT3m	99.8249	1.19593		S6T3g	95.5118	9.49467		GGH-10FTHF7GLUe	98.132	6.63227
GLDBRAN	100		MLTG1ly	100	5.61557e-12		GK1m	99.8249	1.19593		S6TASE10ly	95.5118	9.49467		GGH-10FTHF7GLUl	98.132	6.63227
GLGNS1	100		MMCD	100	5.61557e-12		GLACO	99.8249	1.19593		S6TASE11ly	95.5118	9.49467		GGH-5DHFe	98.132	6.63227
GLNALANaEx	100		MMCDm	100	5.61557e-12		GLACOm	99.8249	1.19593		S6TASE12ly	95.5118	9.49467		GGH-5DHFl	98.132	6.63227
GLNASNNaEx	100		MMCDp	100	5.61557e-12		GLACter	99.8249	1.19593		S6TASE13ly	95.5118	9.49467		GGH-5THFe	98.132	6.63227
GLNCYSNaEx	100		MMEm	100	5.61557e-12		GLAl	99.8249	1.19593		S6TASE14ly	95.5118	9.49467		GGH-5THFl	98.132	6.63227
GLNLASEer	100		MMSAD1m	100	5.61557e-12		GLB1	99.8249	1.19593		S6TASE15ly	95.5118	9.49467		GGH-6DHFe	98.132	6.63227
GLNS	100		MMSAD3m	100	5.74812e-12		GLBRAN	99.8249	1.19593		S6TASE16ly	95.5118	9.49467		GGH-6DHFl	98.132	6.63227
GLNSERNaEx	100		MOGAT	100	5.61557e-12		GLCAASE1ly	99.8249	1.19593		S6TASE17ly	95.5118	9.49467		GGH-6THFe	98.132	6.63227
GLNt4	100		MTAP	100	5.61557e-12		GLCAASE4ly	99.8249	1.19593		S6TASE18ly	95.5118	9.49467		GGH-6THFl	98.132	6.63227
GLNTHRNaEx	100		MTHFD	100	5.61557e-12		GLCAASE5ly	99.8249	1.19593		S6TASE19ly	95.5118	9.49467		GGH-7DHFe	98.132	6.63227
GLNtm	100		MTHFD2	100	5.61557e-12		GLCAASE6ly	99.8249	1.19593		S6TASE1ly	95.5118	9.49467		GGH-7DHFl	98.132	6.63227
GLNtN1	100		NABTNO	100	5.61557e-12		GLCAASE7ly	99.8249	1.19593		S6TASE20ly	95.5118	9.49467		GGH-7THFe	98.132	6.63227
GLPASE1	100		NABTNOm	100	5.61557e-12		GLCAASE8ly	99.8249	1.19593		S6TASE21ly	95.5118	9.49467		GGH-7THFl	98.132	6.63227
GLPASE2	100		NACHEX10ly	100	5.61557e-12		GLCAASE9ly	99.8249	1.19593		S6TASE25ly	95.5118	9.49467		GGLUCT	98.132	6.63227
GLRASE	100		NACHEX11ly	100	5.61557e-12		GLCAE2g	99.8249	1.19593		S6TASE26ly	95.5118	9.49467		GGNG	98.132	6.63227
GLU5Km	100		NACHEX12ly	100	5.61557e-12		GLCAT2g	99.8249	1.19593		S6TASE2ly	95.5118	9.49467		GGT_L	98.132	6.63227
GLUCYS	100		NACHEX13ly	100	5.61557e-12		GLCAT3g	99.8249	1.19593		S6TASE3ly	95.5118	9.49467		GGT_U	98.132	6.63227
GLUDxm	100		NACHEX14ly	100	5.61557e-12		GLCAT4g	99.8249	1.19593		S6TASE4ly	95.5118	9.49467		GGT5r	98.132	6.63227
GLUDym	100		NACHEX15ly	100	5.61557e-12		GLCAT5g	99.8249	1.19593		S6TASE5ly	95.5118	9.49467		GGT6	98.132	6.63227
GluForTx	100		NACHEX16ly	100	5.61557e-12		GLCAT6g	99.8249	1.19593		S6TASE6ly	95.5118	9.49467		GHMT2rm	98.132	6.63227
GLUNm	100		NACHEX17ly	100	5.61557e-12		GLCAT7g	99.8249	1.19593		S6TASE7ly	95.5118	9.49467		GHMT3	98.132	6.63227
GLUt2m	100		NACHEX18ly	100	5.61557e-12		GLCAT8g	99.8249	1.19593		S6TASE8ly	95.5118	9.49467		GHMT3m	98.132	6.63227
GLUt6	100		NACHEX19ly	100	5.61557e-12		GLCAT9g	99.8249	1.19593		S6TASE9ly	95.5118	9.49467		GK1m	98.132	6.63227
GLUt7l	100		NACHEX1ly	100	5.61557e-12		GLCATg	99.8249	1.19593		SACCD3m	95.5118	9.49467		GLACO	98.132	6.63227
GLUTCOADHm	100		NACHEX20ly	100	5.61557e-12		GLCMter	99.8249	1.19593		SACCD4m	95.5118	9.49467		GLACOm	98.132	6.63227
GLUtr	100		NACHEX21ly	100	5.61557e-12		GLCNACASE1ly	99.8249	1.19593		SALMCOM2	95.5118	9.49467		GLACter	98.132	6.63227
GLUVESSEC	100		NACHEX22ly	100	5.61557e-12		GLCNACASE2ly	99.8249	1.19593		SARCOXp	95.5118	9.49467		GLAl	98.132	6.63227
GLXO1	100		NACHEX26ly	100	5.61557e-12		GLCNACASE3ly	99.8249	1.19593		SARCStex	95.5118	9.49467		GLB1	98.132	6.63227
GLXtm	100		NACHEX2ly	100	5.61557e-12		GLCNACASE4ly	99.8249	1.19593		SARCStm	95.5118	9.49467		GLBRAN	98.132	6.63227
GLXtp	100		NACHEX3ly	100	5.61557e-12		GLCNACASE5ly	99.8249	1.19593		SARCStp	95.5118	9.49467		GLCAASE1ly	98.132	6.63227
GLYAMDTRc	100		NACHEX4ly	100	5.61557e-12		GLCNACDASg	99.8249	1.19593		SBPP1er	95.5118	9.49467		GLCAASE4ly	98.132	6.63227
GLYATm	100		NACHEX5ly	100	5.61557e-12		GLCNACPT_L	99.8249	1.19593		SBPP3er	95.5118	9.49467		GLCAASE5ly	98.132	6.63227
GLYBt4(2)r	100		NACHEX6ly	100	5.61557e-12		GLCNACPT_U	99.8249	1.19593		SCP21x	95.5118	9.49467		GLCAASE6ly	98.132	6.63227
GLYBtm	100		NACHEX7ly	100	5.61557e-12		GLCNACT_L	99.8249	1.19593		SCP22x	95.5118	9.49467		GLCAASE7ly	98.132	6.63227
GLYC-St	100		NACHEX8ly	100	5.61557e-12		GLCNACT_U	99.8249	1.19593		SCP2x	95.5118	9.49467		GLCAASE8ly	98.132	6.63227
GLYC3Ptm	100		NACHEX9ly	100	5.61557e-12		GLCNACT1g	99.8249	1.19593		SCP3x	95.5118	9.49467		GLCAASE9ly	98.132	6.63227
GLYCK2	100		NACUP	100	5.61557e-12		GLCNACT2g	99.8249	1.19593		SCPx	95.5118	9.49467		GLCAE2g	98.132	6.63227
GLYCLTDy	100		NADHtpu	100	5.61557e-12		GLCNACT3g	99.8249	1.19593		SEAHCYSHYD	95.5118	9.49467		GLCAT2g	98.132	6.63227
GLYCLTtp	100		NADNe	100	5.61557e-12		GLCNACT4g	99.8249	1.19593		SEAHCYStn	95.5118	9.49467		GLCAT3g	98.132	6.63227
GLYCt	100		NADPN	100	5.61557e-12		GLCNACT5g	99.8249	1.19593		SEASMETtn	95.5118	9.49467		GLCAT4g	98.132	6.63227
GLYCtm	100		NADPNe	100	5.61557e-12		GLCt1r	99.8249	1.19593		SELADT	95.5118	9.49467		GLCAT5g	98.132	6.63227
GLYK	100		NADtpu	100	5.61557e-12		GLCt2_2	99.8249	1.19593		SELCYSLY	95.5118	9.49467		GLCAT6g	98.132	6.63227
GLYKm	100		NADtru	100	5.61557e-12		GLCt2r	99.8249	1.19593		SELCYSLY2	95.5118	9.49467		GLCAT7g	98.132	6.63227
GLYOX	100		NAHCO3_HCLt	100	5.61557e-12		GLCt4	99.8249	1.19593		SELCYSTGL	95.5118	9.49467		GLCAT8g	98.132	6.63227
GLYOXm	100		NAIt	100	5.61557e-12		GLCt4_2	99.8249	1.19593		SELMETAT	95.5118	9.49467		GLCAT9g	98.132	6.63227
GLYt2r	100		NAt	100	5.61557e-12		GLCter	99.8249	1.19593		SELNPS	95.5118	9.49467		GLCATg	98.132	6.63227
GLYt2rL	100		NAt3_1	100	5.61557e-12		GLCtg	99.8249	1.19593		SELt4_3	95.5118	9.49467		GLCMter	98.132	6.63227
GLYt4	100		NAt3_1g	100	5.61557e-12		GLCtly	99.8249	1.19593		SERALANaEx	95.5118	9.49467		GLCNACASE1ly	98.132	6.63227
GLYt7(211)r	100		NAt5	100	5.61557e-12		GLCURter	99.8249	1.19593		SERASNNaEx	95.5118	9.49467		GLCNACASE2ly	98.132	6.63227
GLYt7(311)r	100		NAtx	100	5.61557e-12		GLCURtly	99.8249	1.19593		SERCYSNaEx	95.5118	9.49467		GLCNACASE3ly	98.132	6.63227
GLYtm	100		NCAMUP	100	5.61557e-12		GLDBRAN	99.8249	1.19593		SERGLNexR	95.5118	9.49467		GLCNACASE4ly	98.132	6.63227
GLYtp	100		NCCt	100	5.61557e-12		GLGNS1	99.8249	1.19593		SERGLNNaEx	95.5118	9.49467		GLCNACASE5ly	98.132	6.63227
GLYVESSEC	100		NCKt	100	5.61557e-12		GLNALANaEx	99.8249	1.19593		SERGLYexR	95.5118	9.49467		GLCNACDASg	98.132	6.63227
GMAND	100		NCNt	100	5.61557e-12		GLNASNNaEx	99.8249	1.19593		SERt4	95.5118	9.49467		GLCNACPT_L	98.132	6.63227
GMPR	100		NDP10ex	100	5.61557e-12		GLNCYSNaEx	99.8249	1.19593		SERTHRNaEx	95.5118	9.49467		GLCNACPT_U	98.132	6.63227
GMPtg	100		NDP3ex	100	5.61557e-12		GLNLASEer	99.8249	1.19593		SERtN1	95.5118	9.49467		GLCNACT_L	98.132	6.63227
GMPtn	100		NDP7ex	100	5.61557e-12		GLNSERNaEx	99.8249	1.19593		SERtp	95.5118	9.49467		GLCNACT_U	98.132	6.63227
GND	100		NDP8ex	100	5.61557e-12		GLNt4	99.8249	1.19593		SGALSIDEtl	95.5118	9.49467		GLCNACT1g	98.132	6.63227
GNDer	100		NDPK1	100	5.61557e-12		GLNTHRNaEx	99.8249	1.19593		SGPL11r	95.5118	9.49467		GLCNACT2g	98.132	6.63227
GNMT	100		NDPK10	100	5.61557e-12		GLNtm	99.8249	1.19593		SIAASE	95.5118	9.49467		GLCNACT3g	98.132	6.63227
GP1CALPHAte	100		NDPK10m	100	5.61557e-12		GLNtN1	99.8249	1.19593		SIAASE2ly	95.5118	9.49467		GLCNACT4g	98.132	6.63227
GP1CALPHAtg	100		NDPK10n	100	5.61557e-12		GLPASE1	99.8249	1.19593		SIAASE3ly	95.5118	9.49467		GLCNACT5g	98.132	6.63227
GP1Cte	100		NDPK1m	100	5.61557e-12		GLPASE2	99.8249	1.19593		SIAASE4ly	95.5118	9.49467		GLCt1r	98.132	6.63227
GP1Ctg	100		NDPK1n	100	5.61557e-12		GLRASE	99.8249	1.19593		SIAASEly	95.5118	9.49467		GLCt2_2	98.132	6.63227
GPAM_hs	100		NDPK2	100	5.61557e-12		GLU5Km	99.8249	1.19593		SIAT4Bg	95.5118	9.49467		GLCt2r	98.132	6.63227
GPAMm_hs	100		NDPK2m	100	5.61557e-12		GLUCYS	99.8249	1.19593		SLCBK1	95.5118	9.49467		GLCt4	98.132	6.63227
GPDDA1	100		NDPK2n	100	5.61557e-12		GLUDxm	99.8249	1.19593		SLDt	95.5118	9.49467		GLCt4_2	98.132	6.63227
GPIAT	100		NDPK3	100	5.61557e-12		GLUDym	99.8249	1.19593		SLDx	95.5118	9.49467		GLCter	98.132	6.63227
GPIMTer_L	100		NDPK3n	100	5.61557e-12		GLUNm	99.8249	1.19593		SLDxm	95.5118	9.49467		GLCtg	98.132	6.63227
GPIMTer_U	100		NDPK4	100	5.61557e-12		GLUt2m	99.8249	1.19593		SMPD3g	95.5118	9.49467		GLCtly	98.132	6.63227
GQ1BALPHAte	100		NDPK4n	100	5.61557e-12		GLUt6	99.8249	1.19593		SMPD3l	95.5118	9.49467		GLCURter	98.132	6.63227
GQ1BALPHAtg	100		NDPK5	100	5.61557e-12		GLUt7l	99.8249	1.19593		SMPD4	95.5118	9.49467		GLCURtly	98.132	6.63227
GQ1Bte	100		NDPK5n	100	5.61557e-12		GLUTCOADHm	99.8249	1.19593		SO4CLtex2	95.5118	9.49467		GLDBRAN	98.132	6.63227
GQ1Btg	100		NDPK7	100	5.61557e-12		GLUtr	99.8249	1.19593		SO4HCOtex	95.5118	9.49467		GLGNS1	98.132	6.63227
GRTT	100		NDPK7n	100	5.61557e-12		GLUVESSEC	99.8249	1.19593		SO4OXAtex2	95.5118	9.49467		GLNALANaEx	98.132	6.63227
GRTTx	100		NDPK8	100	5.61557e-12		GLXO1	99.8249	1.19593		SO4t4_2	95.5118	9.49467		GLNASNNaEx	98.132	6.63227
GSNKm	100		NDPK8n	100	5.61557e-12		GLXtm	99.8249	1.19593		SO4t4_3	95.5118	9.49467		GLNCYSNaEx	98.132	6.63227
GSNt	100		NDPK9	100	5.61557e-12		GLXtp	99.8249	1.19593		SOAT11	95.5118	9.49467		GLNLASEer	98.132	6.63227
GSNt4	100		NDPK9m	100	5.61557e-12		GLYATm	99.8249	1.19593		SOAT11r	95.5118	9.49467		GLNSERNaEx	98.132	6.63227
GSNt5	100		NDPK9n	100	5.61557e-12		GLYBt4(2)r	99.8249	1.19593		SOAT12r	95.5118	9.49467		GLNt4	98.132	6.63227
GSNtl	100		NH4t3r	100	5.61557e-12		GLYBtm	99.8249	1.19593		SPH1Ptr	95.5118	9.49467		GLNTHRNaEx	98.132	6.63227
GSNtm	100		NKCC2t	100	5.61557e-12		GLYC-St	99.8249	1.19593		SPHGNtr	95.5118	9.49467		GLNtm	98.132	6.63227
GT1Ate	100		NKCCt	100	5.61557e-12		GLYC3Ptm	99.8249	1.19593		SPHINGStr	95.5118	9.49467		GLNtN1	98.132	6.63227
GT1Atg	100		NMNATm	100	5.61557e-12		GLYCK2	99.8249	1.19593		SPHMYLNtg	95.5118	9.49467		GLPASE1	98.132	6.63227
GTHDH	100		NMPTRCOX	100	5.61557e-12		GLYCLTDy	99.8249	1.19593		SPHMYLNtl	95.5118	9.49467		GLPASE2	98.132	6.63227
GTHO	100		NNAT	100	5.61557e-12		GLYCLTtp	99.8249	1.19593		SPMS	95.5118	9.49467		GLRASE	98.132	6.63227
GTHOm	100		NNATm	100	5.61557e-12		GLYCt	99.8249	1.19593		SPODM	95.5118	9.49467		GLU5Km	98.132	6.63227
GTHP	100		NNDPR	100	5.61557e-12		GLYCtm	99.8249	1.19593		SPODMm	95.5118	9.49467		GLUCYS	98.132	6.63227
GTHPe	100		NP1	100	5.61557e-12		GLYK	99.8249	1.19593		SPODMn	95.5118	9.49467		GLUDxm	98.132	6.63227
GTHPm	100		NPTHLte	100	5.61557e-12		GLYKm	99.8249	1.19593		SPODMx	95.5118	9.49467		GLUDym	98.132	6.63227
GTHRDt	100		NRPPHRt4(2)r	100	5.61557e-12		GLYOX	99.8249	1.19593		SPRMS	95.5118	9.49467		GLUNm	98.132	6.63227
GTHRDtr	100		NRPPHRtu	100	5.61557e-12		GLYOXm	99.8249	1.19593		SPRn	95.5118	9.49467		GLUt2m	98.132	6.63227
GTHS	100		NRVNCCPT1	100	5.61557e-12		GLYt2r	99.8249	1.19593		SR5AR2r	95.5118	9.49467		GLUt6	98.132	6.63227
GTMLTe	100		NRVNCCPT2	100	5.61557e-12		GLYt2rL	99.8249	1.19593		SR5ARr	95.5118	9.49467		GLUt7l	98.132	6.63227
GTPCI	100		NRVNCCRNt	100	5.61557e-12		GLYt4	99.8249	1.19593		SRTN23OX	95.5118	9.49467		GLUTCOADHm	98.132	6.63227
GTPCIn	100		NRVNCt	100	5.61557e-12		GLYt7(211)r	99.8249	1.19593		SRTNACT	95.5118	9.49467		GLUtr	98.132	6.63227
GTPtn	100		NTD12	100	6.20507e-12		GLYt7(311)r	99.8249	1.19593		SRTNt6(2)r	95.5118	9.49467		GLUVESSEC	98.132	6.63227
GUACYC	100		NTD2e	100	5.61557e-12		GLYtm	99.8249	1.19593		SRTNtu	95.5118	9.49467		GLXO1	98.132	6.63227
GUAD	100		NTD2l	100	5.61557e-12		GLYtp	99.8249	1.19593		SSALxm	95.5118	9.49467		GLXtm	98.132	6.63227
GUAPRT	100		NTD2m	100	5.61557e-12		GLYVESSEC	99.8249	1.19593		ST3GAL21g	95.5118	9.49467		GLXtp	98.132	6.63227
GUAt	100		NTD3l	100	5.61557e-12		GMAND	99.8249	1.19593		ST3GAL22g	95.5118	9.49467		GLYATm	98.132	6.63227
[truncated: 1,395 more rows]

## Sheet: DENV
			Enforcement using				Enforcement using				Enforcement using randomly generated BOFs using uniform				Enforcement using randomly generated BOFs using
Enforcement using original DENV sequence			point mutated (1 to 10 mutations) DENV sequences				point mutated (1-genome length mutations) DENV sequences				distributions centred around individual DENV stoichiometric coefficients				uniform distribution centered around average DENV stoichiometric coefficient value
Model Reaction ID	%of original virus optima		Model Reaction ID	<%of original virus optima>	StdDev		Model Reaction ID	<%of original virus optima>	StdDev		Model Reaction ID	<%of original virus optima>	StdDev		Model Reaction ID	<%of original virus optima>	StdDev
EX_lys-L(e)	0		EX_lys-L(e)	0	0		sink_Tyr-ggn	0	0		sink_Tyr-ggn	0	0		sink_Tyr-ggn	0	0
sink_Tyr-ggn	0		sink_Tyr-ggn	0	0		EX_lys-L(e)	0.0987721	3.12189		EX_lys-L(e)	23.9692	41.6094		EX_lys-L(e)	3.11975	17.1586
GK1	50		GK1	50	1.45906e-13		EX_ile-L(e)	33.5314	45.7285		EX_ile-L(e)	40.3881	43.4588		EX_ile-L(e)	20.1375	38.2251
CTPS1	65.0989		CTPS1	65.0941	0.370636		ILEtec	34.9993	47.696		ILEtec	45.0571	48.4492		ILEtec	21.6779	41.0892
ASPCTr	70.3801		ASPCTr	70.3731	0.0901605		GK1	49.988	0.157508		GK1	48.0257	4.66607		GK1	49.0449	3.28001
CBPS	70.3801		CBPS	70.3731	0.0901605		CTPS1	66.4681	11.0098		CTPS1	75.7305	20.4373		CTPS1	68.8764	19.7562
DHORD9	70.3801		DHORD9	70.3731	0.0901605		GMPS2	71.7157	5.79086		H2CO3D	78.3889	14.0227		EX_pi(e)	71.4226	14.3702
DHORTS	70.3801		DHORTS	70.3731	0.0901605		IMPD	71.7157	5.79086		H2CO3D2	78.3889	14.0227		PRPPS	71.4295	9.9735
H2CO3D	70.3801		ORPT	70.3731	0.0901605		H2CO3D	74.6236	6.94735		DHORD9	78.3889	14.0227		RPI	71.4295	9.9735
H2CO3D2	70.3801		OMPDC	70.3731	0.0901605		H2CO3D2	74.6236	6.94735		DHORTS	78.3889	14.0227		H2CO3D	72.2062	11.5681
OMPDC	70.3801		H2CO3D	70.3731	0.0901605		OMPDC	74.6236	6.94735		ASPCTr	78.3889	14.0227		H2CO3D2	72.2062	11.5681
ORPT	70.3801		H2CO3D2	70.3731	0.0901605		ASPCTr	74.6236	6.94735		CBPS	78.3889	14.0227		CBPS	72.2062	11.5681
PRPPS	70.7048		PRPPS	70.6976	0.0915967		CBPS	74.6236	6.94735		OMPDC	78.3889	14.0227		ORPT	72.2062	11.5681
RPI	70.7048		RPI	70.6976	0.0915967		DHORD9	74.6236	6.94735		ORPT	78.3889	14.0227		ASPCTr	72.2062	11.5681
GMPS2	70.8983		IMPD	70.8901	0.0925158		DHORTS	74.6236	6.94735		PRPPS	78.4867	11.2039		DHORD9	72.2062	11.5681
IMPD	70.8983		GMPS2	70.8901	0.0925158		ORPT	74.6236	6.94735		RPI	78.4867	11.2039		DHORTS	72.2062	11.5681
ADSL2	71.0294		IMPC	71.0222	0.0930329		PRPPS	75.0127	7.0467		GMPS2	79.8022	15.5168		OMPDC	72.2062	11.5681
AICART	71.0294		PRAIS	71.0222	0.0930329		RPI	75.0127	7.0467		IMPD	79.8022	15.5168		GMPS2	73.3542	14.7848
AIRCr	71.0294		PRFGS	71.0222	0.0930329		5HLTDL	75.2874	6.52376		PRFGS	79.9536	11.9996		IMPD	73.3542	14.7848
GARFT	71.0294		PRAGSr	71.0222	0.0930329		5HTRPVESSEC	75.2874	6.52376		ADSL2	79.9536	11.9996		PRAGSr	73.9476	12.4547
GLUPRT	71.0294		GLUPRT	71.0222	0.0930329		EX_5htrp(e)	75.2874	6.52376		PRAGSr	79.9536	11.9996		GLUPRT	73.9476	12.4547
IMPC	71.0294		AIRCr	71.0222	0.0930329		EX_srtn(e)	75.2874	6.52376		AICART	79.9536	11.9996		IMPC	73.9476	12.4547
PRAGSr	71.0294		GARFT	71.0222	0.0930329		EX_trp-L(e)	75.2874	6.52376		PRAIS	79.9536	11.9996		PRASCS	73.9476	12.4547
PRAIS	71.0294		AICART	71.0222	0.0930329		TRPHYDRO2	75.2874	6.52376		GLUPRT	79.9536	11.9996		ADSL2	73.9476	12.4547
PRASCS	71.0294		ADSL2	71.0222	0.0930329		IMPC	75.4012	7.14455		IMPC	79.9536	11.9996		PRAIS	73.9476	12.4547
PRFGS	71.0294		PRASCS	71.0222	0.0930329		AICART	75.4012	7.14455		AIRCr	79.9536	11.9996		GARFT	73.9476	12.4547
ADSL1	71.1403		ADSL1	71.1339	0.0939022		ADSL2	75.4012	7.14455		GARFT	79.9536	11.9996		PRFGS	73.9476	12.4547
ADSS	71.1403		ADSS	71.1339	0.0939022		GARFT	75.4012	7.14455		PRASCS	79.9536	11.9996		AICART	73.9476	12.4547
EX_pi(e)	77.6274		EX_pi(e)	77.6179	0.122222		PRAIS	75.4012	7.14455		ADSS	82.4668	14.4019		AIRCr	73.9476	12.4547
CYSTGL	81.1525		CYSTGL	81.1658	0.250336		PRASCS	75.4012	7.14455		ADSL1	82.4668	14.4019		5HLTDL	74.9609	13.8712
CYSTS	81.1525		CYSTS	81.1658	0.250336		PRAGSr	75.4012	7.14455		CYSTGL	84.7473	12.8861		5HTRPVESSEC	74.9609	13.8712
GHMT2r	86.611		GHMT2r	86.6042	0.181985		PRFGS	75.4012	7.14455		CYSTS	84.7473	12.8861		EX_5htrp(e)	74.9609	13.8712
2HBO	87.5041		2HBO	87.5092	0.105966		AIRCr	75.4012	7.14455		EX_pi(e)	86.4316	14.7065		EX_srtn(e)	74.9609	13.8712
2HBt2	87.5041		2HBt2	87.5092	0.105966		GLUPRT	75.4012	7.14455		5HLTDL	90.6979	10.7279		EX_trp-L(e)	74.9609	13.8712
2MCITt	87.5041		2MCITt	87.5092	0.105966		ADSS	79.8318	9.1927		5HTRPVESSEC	90.6979	10.7279		TRPHYDRO2	74.9609	13.8712
EX_2hb(e)	87.5041		EX_2hb(e)	87.5092	0.105966		ADSL1	79.8318	9.1927		EX_5htrp(e)	90.6979	10.7279		ADSS	76.3527	14.5725
EX_2mcit(e)	87.5041		EX_2mcit(e)	87.5092	0.105966		CYSTGL	80.8816	3.29665		EX_srtn(e)	90.6979	10.7279		ADSL1	76.3527	14.5725
MCITS	87.5041		MCITS	87.5092	0.105966		CYSTS	80.8816	3.29665		EX_trp-L(e)	90.6979	10.7279		CYSTGL	81.6308	11.0571
OBDHc	87.5041		OBDHc	87.5092	0.105966		EX_pi(e)	83.1135	8.789		TRPHYDRO2	90.6979	10.7279		CYSTS	81.6308	11.0571
EX_thr-L(e)	90.9875		EX_thr-L(e)	90.9875	1.53301e-12		CYSTA	86.0654	2.90811		CYSAMO	91.6356	10.1903		THBPT4ACAMDASE	87.3583	9.33844
THRD_L	90.9875		THRD_L	90.9875	1.53301e-12		EX_mercplaccys(e)	86.0654	2.90811		CYSTA	91.6356	10.1903		CYSAMO	89.1891	8.47138
5HLTDL	91.2914		EX_trp-L(e)	91.3107	0.44845		MCLACCYSR	86.0654	2.90811		EX_cgly(e)	91.6356	10.1903		EX_cgly(e)	89.1891	8.47138
5HTRPVESSEC	91.2914		5HLTDL	91.3107	0.44845		MCLOR	86.0654	2.90811		EX_cys-L(e)	91.6356	10.1903		EX_cys-L(e)	89.1891	8.47138
EX_5htrp(e)	91.2914		5HTRPVESSEC	91.3107	0.44845		MERCPLACCYSt	86.0654	2.90811		EX_mercplaccys(e)	91.6356	10.1903		EX_mercplaccys(e)	89.1891	8.47138
EX_srtn(e)	91.2914		EX_5htrp(e)	91.3107	0.44845		EX_cgly(e)	86.0698	2.91154		EX_met-L(e)	91.6356	10.1903		EX_met-L(e)	89.1891	8.47138
EX_trp-L(e)	91.2914		EX_srtn(e)	91.3107	0.44845		CYSAMO	86.0708	2.9164		EX_taur(e)	91.6356	10.1903		EX_taur(e)	89.1891	8.47138
TRPHYDRO2	91.2914		TRPHYDRO2	91.3107	0.44845		EX_taur(e)	86.0708	2.9164		HYPTROX	91.6356	10.1903		HYPTROX	89.1891	8.47138
CYSAMO	92.7436		CYSAMO	92.7523	0.304379		HYPTROX	86.0708	2.9164		MCLACCYSR	91.6356	10.1903		MCLACCYSR	89.1891	8.47138
CYSTA	92.7436		CYSTA	92.7523	0.304379		PAN4PP	86.0708	2.9164		MCLOR	91.6356	10.1903		MCLOR	89.1891	8.47138
EX_cgly(e)	92.7436		EX_cgly(e)	92.7523	0.304379		PNTEH	86.0708	2.9164		MERCPLACCYSt	91.6356	10.1903		MERCPLACCYSt	89.1891	8.47138
EX_cys-L(e)	92.7436		EX_cys-L(e)	92.7523	0.304379		PNTK	86.0708	2.9164		PAN4PP	91.6356	10.1903		PAN4PP	89.1891	8.47138
EX_mercplaccys(e)	92.7436		EX_mercplaccys(e)	92.7523	0.304379		PPCDC	86.0708	2.9164		PNTEH	91.6356	10.1903		PNTEH	89.1891	8.47138
EX_met-L(e)	92.7436		EX_met-L(e)	92.7523	0.304379		PPNCL3	86.0708	2.9164		PNTK	91.6356	10.1903		PNTK	89.1891	8.47138
EX_taur(e)	92.7436		EX_taur(e)	92.7523	0.304379		EX_cys-L(e)	86.0708	2.9164		PPCDC	91.6356	10.1903		PPCDC	89.1891	8.47138
HYPTROX	92.7436		HYPTROX	92.7523	0.304379		TAURt4(2)r	86.0708	2.9164		PPNCL3	91.6356	10.1903		PPNCL3	89.1891	8.47138
MCLACCYSR	92.7436		MCLACCYSR	92.7523	0.304379		EX_met-L(e)	86.0712	2.91806		TAURt4(2)r	91.6356	10.1903		TAURt4(2)r	89.1891	8.47138
MCLOR	92.7436		MCLOR	92.7523	0.304379		AHC	92.1015	6.1587		2HBO	92.0257	10.4613		CYSTA	89.1891	8.47138
MERCPLACCYSt	92.7436		MERCPLACCYSt	92.7523	0.304379		METAT	92.1015	6.1587		2HBt2	92.0257	10.4613		AHC	89.7002	11.6275
PAN4PP	92.7436		PAN4PP	92.7523	0.304379		GHMT2r	93.3695	6.55338		2MCITt	92.0257	10.4613		METAT	89.7002	11.6275
PNTEH	92.7436		PNTEH	92.7523	0.304379		THBPT4ACAMDASE	93.3803	5.13738		EX_2hb(e)	92.0257	10.4613		DHPR	90.9235	9.58094
PNTK	92.7436		PNTK	92.7523	0.304379		2HBO	93.4503	5.53525		EX_2mcit(e)	92.0257	10.4613		DHPR2	90.9235	9.58094
PPCDC	92.7436		PPCDC	92.7523	0.304379		2HBt2	93.4503	5.53525		MCITS	92.0257	10.4613		3MLDAt	91.1176	10.7595
PPNCL3	92.7436		PPNCL3	92.7523	0.304379		2MCITt	93.4503	5.53525		OBDHc	92.0257	10.4613		EX_3mlda(e)	91.1176	10.7595
TAURt4(2)r	92.7436		TAURt4(2)r	92.7523	0.304379		EX_2hb(e)	93.4503	5.53525		EX_thr-L(e)	92.1893	10.5645		EX_his-L(e)	91.1176	10.7595
EX_ile-L(e)	98.5995		EX_ile-L(e)	97.9157	8.0292		EX_2mcit(e)	93.4503	5.53525		THRD_L	92.1893	10.5645		EX_hista(e)	91.1176	10.7595
10FTHF5GLUtl	100		ILEtec	99.3333	8.1377		MCITS	93.4503	5.53525		GHMT2r	93.6163	10.1114		FTCD	91.1176	10.7595
10FTHF5GLUtm	100		10FTHF5GLUtl	100	0		OBDHc	93.4503	5.53525		ORNTArm	94.9517	9.60688		GluForTx	91.1176	10.7595
10FTHF6GLUtl	100		10FTHF5GLUtm	100	0		DHPR	93.7448	5.10976		3MLDAt	95.1509	9.46894		HISD	91.1176	10.7595
10FTHF6GLUtm	100		10FTHF6GLUtl	100	0		DHPR2	93.7448	5.10976		EX_3mlda(e)	95.1509	9.46894		HISDC	91.1176	10.7595
10FTHF7GLUtl	100		10FTHF6GLUtm	100	0		EX_his-L(e)	96.6266	4.89791		EX_his-L(e)	95.1509	9.46894		HISTAtu	91.1176	10.7595
10FTHF7GLUtm	100		10FTHF7GLUtl	100	0		EX_hista(e)	96.6266	4.89791		EX_hista(e)	95.1509	9.46894		IZPN	91.1176	10.7595
10FTHFtl	100		10FTHF7GLUtm	100	0		HISTAtu	96.6266	4.89792		FTCD	95.1509	9.46894		MACOXO	91.1176	10.7595
10FTHFtm	100		10FTHFtl	100	0		FTCD	96.6282	4.90018		GluForTx	95.1509	9.46894		MHISOR	91.1176	10.7595
13DAMPPOX	100		10FTHFtm	100	0		GluForTx	96.6282	4.90018		HISD	95.1509	9.46894		SAMHISTA	91.1176	10.7595
1a,24,25VITD2Hm	100		13DAMPPOX	100	0		HISD	96.6282	4.90018		HISDC	95.1509	9.46894		URCN	91.1176	10.7595
1a,24,25VITD3Hm	100		1a,24,25VITD2Hm	100	0		IZPN	96.6282	4.90018		HISTAtu	95.1509	9.46894		PHETHPTOX2	91.1195	9.06727
1a,25VITD2Hm	100		1a,24,25VITD3Hm	100	0		URCN	96.6282	4.90018		IZPN	95.1509	9.46894		ASNS1	93.0403	9.18693
1a,25VITD3Hm	100		1a,25VITD2Hm	100	0		3MLDAt	96.6344	4.9001		MACOXO	95.1509	9.46894		GHMT2r	93.6735	9.27335
1MNCAMti	100		1a,25VITD3Hm	100	0		HISDC	96.6344	4.9001		MHISOR	95.1509	9.46894		P5CRxm	96.3062	7.338
24,25DHVITD2t	100		1MNCAMti	100	0		MACOXO	96.6344	4.9001		SAMHISTA	95.1509	9.46894		PROtm	96.3062	7.338
24,25DHVITD2tm	100		24,25DHVITD2t	100	0		MHISOR	96.6344	4.9001		URCN	95.1509	9.46894		PYNP2r	96.4339	7.26843
24,25DHVITD3t	100		24,25DHVITD2tm	100	0		SAMHISTA	96.6344	4.9001		ACOAD8m	95.1561	9.41208		PUNP4	96.4766	7.23927
24,25DHVITD3tm	100		24,25DHVITD3t	100	0		EX_3mlda(e)	96.6344	4.9001		EX_leu-L(e)	95.1561	9.41208		CBPSam	96.506	7.21981
24,25VITD2Hm	100		24,25DHVITD3tm	100	0		THRD_L	96.9267	3.92259		LEUt5m	95.1561	9.41208		ADEt	96.506	7.21981
24,25VITD3Hm	100		24,25VITD2Hm	100	0		EX_thr-L(e)	96.9307	3.92438		LEUTAm	95.1561	9.41208		EX_ins(e)	96.506	7.21981
24NPHte	100		24,25VITD3Hm	100	0		PHETHPTOX2	97.9334	3.40078		MCCCrm	95.1561	9.41208		EX_dgsn(e)	96.506	7.21981
25HVITD2t	100		24NPHte	100	0		P5CRxm	99.2136	2.45603		MGCHrm	95.1561	9.41208		EX_gluala(e)	96.506	7.21981
25HVITD2tin	100		25HVITD2t	100	0		PROtm	99.2136	2.45603		OIVD1m	95.1561	9.41208		EX_ade(e)	96.506	7.21981
25HVITD2tin-m	100		25HVITD2tin	100	0		PYNP2r	99.3239	2.2791		DHPR	95.1807	9.36141		EX_ala-L(e)	96.506	7.21981
25HVITD2tm	100		25HVITD2tin-m	100	0		PUNP4	99.3613	2.22373		DHPR2	95.1807	9.36141		EX_dad-2(e)	96.506	7.21981
25HVITD3t	100		25HVITD2tm	100	0		EX_ser-L(e)	99.386	2.1867		THBPT4ACAMDASE	95.1807	9.36141		OCBTm	96.506	7.21981
25HVITD3tin	100		25HVITD3t	100	0		EX_ade(e)	99.386	2.1867		PHETHPTOX2	95.2916	9.43889		EX_gln-L(e)	96.506	7.21981
25HVITD3tin-m	100		25HVITD3tin	100	0		EX_ala-D(e)	99.386	2.1867		ASNS1	95.3161	9.31074		DGSNt	96.506	7.21981
25HVITD3tm	100		25HVITD3tin-m	100	0		EX_ala-L(e)	99.386	2.1867		ALAR	95.8888	9.30615		EX_adn(e)	96.506	7.21981
25VITD2Hm	100		25HVITD3tm	100	0		EX_asn-L(e)	99.386	2.1867		ALATA_L	95.8888	9.30615		EX_ala-D(e)	96.506	7.21981
25VITD3Hm	100		25VITD2Hm	100	0		EX_gsn(e)	99.386	2.1867		AHC	95.9336	9.33231		EX_gly(e)	96.506	7.21981
2DR1PP	100		25VITD3Hm	100	0		CBPSam	99.386	2.1867		METAT	95.9336	9.33231		EX_gua(e)	96.506	7.21981
2HCO3_NAt	100		2DR1PP	100	0		DGSNt	99.386	2.1867		3AIBt	95.9631	9.33093		EX_ser-L(e)	96.506	7.21981
2OXOADOXm	100		2HCO3_NAt	100	0		EX_dgsn(e)	99.386	2.1867		3AIBTm	95.9631	9.33093		GUAt	96.506	7.21981
2OXOADPTm	100		2OXOADOXm	100	0		EX_gln-L(e)	99.386	2.1867		3AIBtm	95.9631	9.33093		EX_glu-L(e)	96.506	7.21981
34DHPHAMT	100		2OXOADPTm	100	0		EX_glu-L(e)	99.386	2.1867		3HBCOAHLm	95.9631	9.33093		EX_gsn(e)	96.506	7.21981
34DHPLACOX	100		34DHPHAMT	100	0		EX_gluala(e)	99.386	2.1867		ACOAD9m	95.9631	9.33093		EX_asn-L(e)	96.506	7.21981
34DHPLACOX(NADP)	100		34DHPLACOX	100	0		EX_gly(e)	99.386	2.1867		ECOAH12m	95.9631	9.33093		EX_nh4(e)	96.506	7.21981
34HPLFM	100		34DHPLACOX(NADP)	100	0		EX_ins(e)	99.386	2.1867		EX_3aib(e)	95.9631	9.33093		HYXNt	96.506	7.21981
35CGMPtn	100		34HPLFM	100	0		HYXNt	99.386	2.1867		EX_val-L(e)	95.9631	9.33093		EX_hxan(e)	96.506	7.21981
3AIBt	100		35CGMPtn	100	0		OCBTm	99.386	2.1867		HIBDm	95.9631	9.33093		EX_pro-L(e)	96.506	7.21981
3AIBTm	100		3AIBt	100	0		ADEt	99.386	2.1867		MMMm	95.9631	9.33093		EX_ura(e)	96.5093	7.21766
3AIBtm	100		3AIBTm	100	0		EX_adn(e)	99.386	2.1867		MMTSADm	95.9631	9.33093		URAt	96.5093	7.21766
3DPHBH1	100		3AIBtm	100	0		EX_dad-2(e)	99.386	2.1867		OIVD2m	95.9631	9.33093		DM_dgtp(n)	96.5209	7.21015
3DPHBH2	100		3DPHBH1	100	0		EX_gua(e)	99.386	2.1867		VALt5m	95.9631	9.33093		DGTPtn	96.5209	7.21015
3DSPHR	100		3DPHBH2	100	0		EX_hxan(e)	99.386	2.1867		VALTAm	95.9631	9.33093		CAMPt	96.5253	7.20726
3HAO	100		3DSPHR	100	0		EX_nh4(e)	99.386	2.1867		PGCD	95.9702	9.30842		EX_camp(e)	96.5253	7.20726
3HBCDm	100		3HAO	100	0		EX_pro-L(e)	99.386	2.1867		PSERT	95.9702	9.30842		EX_dcyt(e)	96.5363	7.20025
3HBCOAHLm	100		3HBCDm	100	0		GUAt	99.386	2.1867		PSP_L	95.9702	9.30842		DCYTt	96.5363	7.20025
3HCO3_NAt	100		3HBCOAHLm	100	0		EX_ura(e)	99.3887	2.18261		EX_13-cis-retnglc(e)	96.0514	9.33213		EX_cytd(e)	96.5628	7.18357
3HLYTCL	100		3HCO3_NAt	100	0		URAt	99.3887	2.18261		EX_retnglc(e)	96.0514	9.33213		ETF	96.5677	7.36536
3HPCOAHYD	100		3HLYTCL	100	0		DM_dgtp(n)	99.3984	2.16835		RETNGLCt	96.0514	9.33213		ETFQO	96.5677	7.36536
3HXKYNDCL	100		3HPCOAHYD	100	0		DGTPtn	99.3984	2.16835		RETNGLCt2	96.0514	9.33213		NADH2-u10m	96.5677	7.36536
3HXKYNOXDA	100		3HXKYNDCL	100	0		CAMPt	99.402	2.16285		RETNGLCt2r	96.0514	9.33213		2HBO	96.581	7.38023
3M4HDXPAC	100		3HXKYNOXDA	100	0		EX_camp(e)	99.402	2.16285		RETNGLCtr	96.0514	9.33213		2HBt2	96.581	7.38023
3MLDAt	100		3M4HDXPAC	100	0		DCYTt	99.4109	2.14949		RETNtr	96.0514	9.33213		2MCITt	96.581	7.38023
3MOBt2im	100		3MLDAt	100	0		EX_dcyt(e)	99.4109	2.14949		RETNtr2	96.0514	9.33213		EX_2hb(e)	96.581	7.38023
3MOPt2im	100		3MOBt2im	100	0		EX_cytd(e)	99.4314	2.11757		UGT1A5r	96.0514	9.33213		EX_2mcit(e)	96.581	7.38023
3MOX4HOXPGALDOX	100		3MOPt2im	100	0		PUNP3	99.4564	2.07763		UGT1A5r2	96.0514	9.33213		MCITS	96.581	7.38023
3MOX4HOXPGALDOX(NADP)	100		3MOX4HOXPGALDOX	100	0		DM_dgtp(m)	99.5125	1.98465		10FTHF5GLUtl	96.0514	9.33213		OBDHc	96.581	7.38023
3MOXTYROX	100		3MOX4HOXPGALDOX(NADP)	100	0		NDPK5m	99.5125	1.98465		10FTHF5GLUtm	96.0514	9.33213		PUNP3	96.5967	7.16282
3NTD7l	100		3MOXTYROX	100	0		EX_35cgmp(e)	99.5142	1.98187		10FTHF6GLUtl	96.0514	9.33213		ARGtm	96.6378	7.12583
3SALAASPm	100		3NTD7l	100	0		CGMPt	99.5142	1.98187		10FTHF6GLUtm	96.0514	9.33213		ARGNm	96.6378	7.12583
3SALATAi	100		3SALAASPm	100	0		DINt	99.5171	1.97702		10FTHF7GLUtl	96.0514	9.33213		EX_urea(e)	96.6378	7.12583
3SALATAim	100		3SALATAi	100	0		EX_din(e)	99.5171	1.97702		10FTHF7GLUtm	96.0514	9.33213		ARGN	96.6378	7.12583
41R1H2MAE12BOOX	100		3SALATAim	100	0		PUNP6	99.5171	1.97702		10FTHFtl	96.0514	9.33213		UREAtm	96.6378	7.12583
41R2A1H12BOOX	100		41R1H2MAE12BOOX	100	0		ARGN	99.5386	1.88328		10FTHFtm	96.0514	9.33213		NDPK5m	96.6794	7.11503
42A12BOOX	100		41R2A1H12BOOX	100	0		ARGNm	99.5386	1.88328		13DAMPPOX	96.0514	9.33213		DM_dgtp(m)	96.6794	7.11503
4ABUTtm	100		42A12BOOX	100	0		ARGtm	99.5386	1.88328		1a,24,25VITD2Hm	96.0514	9.33213		CGMPt	96.6819	7.11361
4HBZCOAFm	100		4ABUTtm	100	0		EX_urea(e)	99.5386	1.88328		1a,24,25VITD3Hm	96.0514	9.33213		EX_35cgmp(e)	96.6819	7.11361
4HBZFm	100		4HBZCOAFm	100	0		UREAtm	99.5386	1.88328		1a,25VITD2Hm	96.0514	9.33213		EX_din(e)	96.6864	7.11114
4HDEBRISOQUINEte	100		4HBZFm	100	0		PUNP5	99.5413	1.9349		1a,25VITD3Hm	96.0514	9.33213		PUNP6	96.6864	7.11114
4HGLSDm	100		4HDEBRISOQUINEte	100	0		GLYAMDTRc	99.592	1.60374		1MNCAMti	96.0514	9.33213		DINt	96.6864	7.11114
4HOXPACDOX(NADP)	100		4HGLSDm	100	0		CREATt4(2)r	99.592	1.60374		24,25DHVITD2t	96.0514	9.33213		EX_creat(e)	96.7065	7.08873
4MOPt2im	100		4HOXPACDOX(NADP)	100	0		EX_creat(e)	99.592	1.60374		24,25DHVITD2tm	96.0514	9.33213		CREATt4(2)r	96.7065	7.08873
4MPTNLte	100		4MOPt2im	100	0		GACMTRc	99.592	1.60374		24,25DHVITD3t	96.0514	9.33213		GACMTRc	96.7065	7.08873
4MPTNLtm	100		4MPTNLte	100	0		DATPtn	99.6086	1.80905		24,25DHVITD3tm	96.0514	9.33213		GLYAMDTRc	96.7065	7.08873
4MPTNLtr	100		4MPTNLtm	100	0		ADKd	99.6086	1.80905		24,25VITD2Hm	96.0514	9.33213		PUNP5	96.726	7.08986
4NPHSFte	100		4MPTNLtr	100	0		DM_datp(n)	99.6086	1.80905		24,25VITD3Hm	96.0514	9.33213		DATPtn	96.8523	7.02828
4NPHSULT	100		4NPHSFte	100	0		DURIPP	99.6322	1.76334		24NPHte	96.0514	9.33213		DM_datp(n)	96.8523	7.02828
4NPHte	100		4NPHSULT	100	0		DHFR	99.6342	1.75949		25HVITD2t	96.0514	9.33213		ADKd	96.8523	7.02828
4PYRDX	100		4NPHte	100	0		TMDS	99.6342	1.75949		25HVITD2tin	96.0514	9.33213		DURIPP	96.9018	7.00685
5ADTSTSTERONEGLCte	100		4PYRDX	100	0		ASNS1	99.6384	1.36874		25HVITD2tin-m	96.0514	9.33213		TMDS	96.906	7.00508
5ADTSTSTERONEGLCtr	100		5ADTSTSTERONEGLCte	100	0		EX_thym(e)	99.6546	1.71888		25HVITD2tm	96.0514	9.33213		DHFR	96.906	7.00508
5ADTSTSTERONEte	100		5ADTSTSTERONEGLCtr	100	0		THYMt	99.6546	1.71888		25HVITD3t	96.0514	9.33213		EX_thym(e)	96.9437	6.98293
5ADTSTSTERONEtr	100		5ADTSTSTERONEte	100	0		TMDPP	99.6546	1.71888		25HVITD3tin	96.0514	9.33213		TMDPP	96.9437	6.98293
5DHFtl	100		5ADTSTSTERONEtr	100	0		DM_datp(m)	99.6956	1.63285		25HVITD3tin-m	96.0514	9.33213		THYMt	96.9437	6.98293
5FTHFt2	100		5DHFtl	100	0		DCTPtn	99.7447	1.5155		25HVITD3tm	96.0514	9.33213		DM_datp(m)	97.0288	6.93672
5HOXINDACTO2OX	100		5FTHFt2	100	0		DM_dctp(n)	99.7447	1.5155		25VITD2Hm	96.0514	9.33213		DCTPtn	97.1293	6.86434
5HOXINDACTOX	100		5HOXINDACTO2OX	100	0		PSERT	99.7954	1.16478		25VITD3Hm	96.0514	9.33213		DM_dctp(n)	97.1293	6.86434
5HOXINDACTOXm	100		5HOXINDACTOX	100	0		PSP_L	99.7954	1.16478		2DR1PP	96.0514	9.33213		3DSPHR	97.3168	6.75124
5HOXINOXDA	100		5HOXINDACTOXm	100	0		PGCD	99.7954	1.16478		2HCO3_NAt	96.0514	9.33213		SERPT	97.3168	6.75124
5HTRPDOX	100		5HOXINOXDA	100	0		3DSPHR	99.8082	1.32528		2OXOADOXm	96.0514	9.33213		SPH1Pte	97.3247	6.74725
5HXKYNDCL	100		5HTRPDOX	100	0		SERPT	99.8082	1.32528		2OXOADPTm	96.0514	9.33213		EX_sph1p(e)	97.3247	6.74725
5HXKYNOXDA	100		5HXKYNDCL	100	0		EX_sph1p(e)	99.8103	1.31812		34DHPHAMT	96.0514	9.33213		DM_dctp(m)	97.3273	6.74598
5MTHFt	100		5HXKYNOXDA	100	0		SPH1Pte	99.8103	1.31812		34DHPLACOX	96.0514	9.33213		NDPK7m	97.3273	6.74598
5MTHFt2	100		5MTHFt	100	0		DM_dctp(m)	99.811	1.31582		34DHPLACOX(NADP)	96.0514	9.33213		EX_uri(e)	97.3432	6.73822
5THFtl	100		5MTHFt2	100	0		NDPK7m	99.811	1.31582		34HPLFM	96.0514	9.33213		ORNTArm	97.4327	6.76586
5THFtm	100		5THFtl	100	0		EX_uri(e)	99.8151	1.30165		35CGMPtn	96.0514	9.33213		EX_thr-L(e)	97.4532	6.67165
6DHFtl	100		5THFtm	100	0		NDPK8m	99.8435	1.17609		3DPHBH1	96.0514	9.33213		THRD_L	97.4532	6.67165
6DHFtm	100		6DHFtl	100	0		DURIt	99.8511	1.13582		3DPHBH2	96.0514	9.33213		NDPK8m	97.4906	6.6771
6HTSTSTERONEte	100		6DHFtm	100	0		EX_duri(e)	99.8511	1.13582		3DSPHR	96.0514	9.33213		DURIt	97.5281	6.65647
6THFtl	100		6HTSTSTERONEte	100	0		EX_4abut(e)	99.862	1.0753		3HAO	96.0514	9.33213		EX_duri(e)	97.5281	6.65647
6THFtm	100		6THFtl	100	0		ETF	99.8796	0.956984		3HBCDm	96.0514	9.33213		EX_4abut(e)	97.5865	6.62836
7DHCHSTEROLtr	100		6THFtm	100	0		ETFQO	99.8796	0.956984		3HCO3_NAt	96.0514	9.33213		SUCD1m	97.6542	6.76723
7DHFtl	100		7DHCHSTEROLtr	100	0		NADH2-u10m	99.8796	0.956984		3HLYTCL	96.0514	9.33213		EX_arg-L(e)	97.6933	6.6046
7DHFtm	100		7DHFtl	100	0		ARGSL	99.8879	0.920613		3HPCOAHYD	96.0514	9.33213		ARGSL	97.7481	6.57643
7THFtl	100		7DHFtm	100	0		ARGSS	99.8879	0.920613		3HXKYNDCL	96.0514	9.33213		ARGSS	97.7481	6.57643
7THFtm	100		7THFtl	100	0		DM_dttp(n)	99.8919	0.891771		3HXKYNOXDA	96.0514	9.33213		DM_dttp(n)	97.7803	6.57067
A_MANASE	100		7THFtm	100	0		DTMPK	99.8919	0.891771		3M4HDXPAC	96.0514	9.33213		DTMPK	97.7803	6.57067
A_MANASEly	100		A_MANASE	100	0		DHCRD1	99.9001	0.831635		3MOBt2im	96.0514	9.33213		PSERT	97.7879	6.5544
A4GALTc	100		A_MANASEly	100	0		DSAT	99.9001	0.831635		3MOPt2im	96.0514	9.33213		PSP_L	97.7879	6.5544
A4GALTg	100		A4GALTc	100	0		DM_ethamp(r)	99.9005	0.828679		3MOX4HOXPGALDOX	96.0514	9.33213		PGCD	97.7879	6.5544
AACOAT	100		A4GALTg	100	0		HDCAter	99.9005	0.828679		3MOX4HOXPGALDOX(NADP)	96.0514	9.33213		CITtbm	97.7988	6.66956
ABO1g	100		AACOAT	100	0		SGPL12r	99.9005	0.828679		3MOXTYROX	96.0514	9.33213		EX_succ(e)	97.7988	6.66956
ABO2g	100		ABO1g	100	0		SMPD4	99.9005	0.828679		3NTD7l	96.0514	9.33213		ME1m	97.7988	6.66956
ABO3g	100		ABO2g	100	0		SPHMDAc	99.9005	0.828679		3SALAASPm	96.0514	9.33213		ME2	97.7988	6.66956
ABO4g	100		ABO3g	100	0		GLNS	99.9006	0.935193		3SALATAi	96.0514	9.33213		ME2m	97.7988	6.66956
ABO5g	100		ABO4g	100	0		CERK	99.9007	0.826645		3SALATAim	96.0514	9.33213		PEPCK	97.7988	6.66956
ABO6g	100		ABO5g	100	0		CRMPte	99.9007	0.826645		41R1H2MAE12BOOX	96.0514	9.33213		PEPCKm	97.7988	6.66956
ABO7g	100		ABO6g	100	0		EX_crmp_hs(e)	99.9007	0.826645		41R2A1H12BOOX	96.0514	9.33213		PYRt2m	97.7988	6.66956
ABO8g	100		ABO7g	100	0		EX_sphs1p(e)	99.9007	0.826645		42A12BOOX	96.0514	9.33213		SUCCt2m	97.7988	6.66956
ABO9g	100		ABO8g	100	0		SPHS1Pte	99.9007	0.826645		4ABUTtm	96.0514	9.33213		DSAT	97.8491	6.56352
ABTArm	100		ABO9g	100	0		DNDPt56m	99.9007	0.826531		4HBZCOAFm	96.0514	9.33213		DHCRD1	97.8491	6.56352
ABTD	100		ABTArm	100	0		ADNK1m	99.9007	0.826531		4HBZFm	96.0514	9.33213		SGPL12r	97.8525	6.56335
ABTti	100		ABTD	100	0		ADNtm	99.9007	0.826531		4HDEBRISOQUINEte	96.0514	9.33213		HDCAter	97.8525	6.56335
ABUTD	100		ABTti	100	0		DNDPt12m	99.9007	0.826531		4HGLSDm	96.0514	9.33213		SPHMDAc	97.8525	6.56335
ABUTt2r	100		ABUTD	100	0		DNDPt13m	99.9007	0.826531		4HOXPACDOX(NADP)	96.0514	9.33213		SMPD4	97.8525	6.56335
ABUTt2rL	100		ABUTt2r	100	0		DNDPt18m	99.9007	0.826531		4MOPt2im	96.0514	9.33213		DM_ethamp(r)	97.8525	6.56335
ABUTt4(2)r	100		ABUTt2rL	100	0		DNDPt19m	99.9007	0.826531		4MPTNLte	96.0514	9.33213		SPHS1Pte	97.8549	6.56324
ACACT1	100		ABUTt4(2)r	100	0		DNDPt1m	99.9007	0.826531		4MPTNLtm	96.0514	9.33213		CERK	97.8549	6.56324
ACACT10m	100		ACACT1	100	0		DNDPt20m	99.9007	0.826531		4MPTNLtr	96.0514	9.33213		CRMPte	97.8549	6.56324
ACACT1r	100		ACACT10m	100	0		DNDPt21m	99.9007	0.826531		4NPHSFte	96.0514	9.33213		EX_sphs1p(e)	97.8549	6.56324
ACACT1rm	100		ACACT1r	100	0		DNDPt2m	99.9007	0.826531		4NPHSULT	96.0514	9.33213		EX_crmp_hs(e)	97.8549	6.56324
ACACT1x	100		ACACT1rm	100	0		DNDPt30m	99.9007	0.826531		4NPHte	96.0514	9.33213		DNDPt57m	97.855	6.56323
ACACt2	100		ACACT1x	100	0		DNDPt31m	99.9007	0.826531		4PYRDX	96.0514	9.33213		DNDPt56m	97.855	6.56323
ACACt2m	100		ACACt2	100	0		DNDPt32m	99.9007	0.826531		5ADTSTSTERONEGLCte	96.0514	9.33213		ADNK1m	97.855	6.56323
ACACT4p	100		ACACt2m	100	0		DNDPt42m	99.9007	0.826531		5ADTSTSTERONEGLCtr	96.0514	9.33213		ADNtm	97.855	6.56323
ACACT5p	100		ACACT4p	100	0		DNDPt43m	99.9007	0.826531		5ADTSTSTERONEte	96.0514	9.33213		DNDPt12m	97.855	6.56323
ACACT6p	100		ACACT5p	100	0		DNDPt44m	99.9007	0.826531		5ADTSTSTERONEtr	96.0514	9.33213		DNDPt13m	97.855	6.56323
ACACT7p	100		ACACT6p	100	0		DNDPt45m	99.9007	0.826531		5DHFtl	96.0514	9.33213		DNDPt18m	97.855	6.56323
ACACT8p	100		ACACT7p	100	0		DNDPt55m	99.9007	0.826531		5FTHFt2	96.0514	9.33213		DNDPt19m	97.855	6.56323
ACACT9p	100		ACACT8p	100	0		DNDPt57m	99.9007	0.826531		5HOXINDACTO2OX	96.0514	9.33213		DNDPt1m	97.855	6.56323
ACACtx	100		ACACT9p	100	0		DNDPt58m	99.9007	0.826531		5HOXINDACTOX	96.0514	9.33213		DNDPt20m	97.855	6.56323
ACALDt	100		ACACtx	100	0		DGK2m	99.9016	0.819371		5HOXINDACTOXm	96.0514	9.33213		DNDPt21m	97.855	6.56323
ACALDtm	100		ACALDt	100	0		DGNSKm	99.9016	0.819371		5HOXINOXDA	96.0514	9.33213		DNDPt30m	97.855	6.56323
ACALDtr	100		ACALDtm	100	0		DGSNtm	99.9016	0.819371		5HTRPDOX	96.0514	9.33213		DNDPt31m	97.855	6.56323
ACALDtx	100		ACALDtr	100	0		DM_dttp(m)	99.9027	0.81123		5HXKYNDCL	96.0514	9.33213		DNDPt32m	97.855	6.56323
ACCOAC	100		ACALDtx	100	0		NDPK4m	99.9027	0.81123		5HXKYNOXDA	96.0514	9.33213		DNDPt43m	97.855	6.56323
ACCOACm	100		ACCOAC	100	0		EX_arg-L(e)	99.9067	0.739502		5MTHFt	96.0514	9.33213		DNDPt44m	97.855	6.56323
ACCOAgt	100		ACCOACm	100	0		MTHFC	99.9222	0.673303		5MTHFt2	96.0514	9.33213		DNDPt45m	97.855	6.56323
ACCOAL	100		ACCOAgt	100	0		PSSA1_hs	99.9327	0.580208		5THFtl	96.0514	9.33213		DNDPt55m	97.855	6.56323
ACCOALm	100		ACCOAL	100	0		EX_ps_hs(e)	99.9327	0.580714		5THFtm	96.0514	9.33213		DNDPt2m	97.855	6.56323
ACCOAtn	100		ACCOALm	100	0		EX_spc_hs(e)	99.9363	0.548946		6DHFtl	96.0514	9.33213		DNDPt42m	97.855	6.56323
ACCOAtr	100		ACCOAtn	100	0		SPC_HSt	99.9363	0.548946		6DHFtm	96.0514	9.33213		DNDPt58m	97.855	6.56323
ACETONEt2	100		ACCOAtr	100	0		EX_no(e)	99.9367	0.54779		6HTSTSTERONEte	96.0514	9.33213		DGNSKm	97.8634	6.56292
ACETONEt2m	100		ACETONEt2	100	0		NOS1	99.9367	0.54779		6THFtl	96.0514	9.33213		DGK2m	97.8634	6.56292
ACGAGBSIDEtg	100		ACETONEt2m	100	0		NOS2	99.9367	0.54779		6THFtm	96.0514	9.33213		DGSNtm	97.8634	6.56292
ACGAGBSIDEtl	100		ACGAGBSIDEtg	100	0		NOt	99.9367	0.54779		7DHCHSTEROLtr	96.0514	9.33213		NDPK4m	97.873	6.56269
ACGALFUCGALACGALFUC12GAL14ACGLCGALGLUSIDEte	100		ACGAGBSIDEtl	100	0		EX_pe_hs(e)	99.9371	0.544074		7DHFtl	96.0514	9.33213		DM_dttp(m)	97.873	6.56269
ACGALFUCGALACGALFUC12GAL14ACGLCGALGLUSIDEtg	100		ACGALFUCGALACGALFUC12GAL14ACGLCGALGLUSIDEte	100	0		PSDm_hs	99.9372	0.543383		7DHFtm	96.0514	9.33213		3AIBt	97.9897	6.55798
ACGALFUCGALACGALFUCGALACGLCGAL14ACGLCGALGLUSIDEte	100		ACGALFUCGALACGALFUC12GAL14ACGLCGALGLUSIDEtg	100	0		PSFLIPm	99.9372	0.543383		7THFtl	96.0514	9.33213		3AIBTm	97.9897	6.55798
ACGALFUCGALACGALFUCGALACGLCGAL14ACGLCGALGLUSIDEtg	100		ACGALFUCGALACGALFUCGALACGLCGAL14ACGLCGALGLUSIDEte	100	0		ACGAM6PSi	99.9403	0.51666		7THFtm	96.0514	9.33213		3AIBtm	97.9897	6.55798
ACGALtly	100		ACGALFUCGALACGALFUCGALACGLCGAL14ACGLCGALGLUSIDEtg	100	0		EX_ha_pre1(e)	99.9403	0.51666		A_MANASE	96.0514	9.33213		3HBCOAHLm	97.9897	6.55798
ACGAM2E	100		ACGALtly	100	0		EX_ha(e)	99.9403	0.51666		A_MANASEly	96.0514	9.33213		ACOAD9m	97.9897	6.55798
ACGAM6PSi	100		ACGAM2E	100	0		CHOLPtl	99.9404	0.515855		A4GALTc	96.0514	9.33213		ECOAH12m	97.9897	6.55798
ACGAMK	100		ACGAM6PSi	100	0		Rtotaltl	99.9404	0.515855		A4GALTg	96.0514	9.33213		EX_3aib(e)	97.9897	6.55798
ACGAMPM	100		ACGAMK	100	0		SMPD3l	99.9404	0.515855		AACOAT	96.0514	9.33213		EX_val-L(e)	97.9897	6.55798
ACGAMtly	100		ACGAMPM	100	0		SPHINGStl	99.9404	0.515855		ABO1g	96.0514	9.33213		HIBDm	97.9897	6.55798
ACGPID	100		ACGAMtly	100	0		SPHMYLNtl	99.9404	0.515855		ABO2g	96.0514	9.33213		MMMm	97.9897	6.55798
ACHEe	100		ACGPID	100	0		ASAH1	99.9404	0.515855		ABO3g	96.0514	9.33213		MMTSADm	97.9897	6.55798
ACHVESSEC	100		ACHEe	100	0		ACOAD8m	99.9457	0.478148		ABO4g	96.0514	9.33213		OIVD2m	97.9897	6.55798
ACITL	100		ACHVESSEC	100	0		HCO3Em	99.9457	0.478148		ABO5g	96.0514	9.33213		VALt5m	97.9897	6.55798
ACN13ACNGALGBSIDEte	100		ACITL	100	0		MCCCrm	99.9457	0.478148		ABO6g	96.0514	9.33213		VALTAm	97.9897	6.55798
ACN13ACNGALGBSIDEtg	100		ACN13ACNGALGBSIDEte	100	0		MGCHrm	99.9457	0.478148		ABO7g	96.0514	9.33213		MTHFC	97.9961	6.55513
ACN23ACNGALGBSIDEte	100		ACN13ACNGALGBSIDEtg	100	0		OIVD1m	99.9457	0.478148		ABO8g	96.0514	9.33213		G5SADrm	97.9993	6.55253
ACN23ACNGALGBSIDEtg	100		ACN23ACNGALGBSIDEte	100	0		METS	99.9463	0.467993		ABO9g	96.0514	9.33213		EX_ps_hs(e)	98.0204	6.55209
ACNACNGAL14ACGLCGALGLUSIDEte	100		ACN23ACNGALGBSIDEtg	100	0		AHCYStr	99.9471	0.461668		ABTArm	96.0514	9.33213		PSSA1_hs	98.0278	6.55177
ACNACNGAL14ACGLCGALGLUSIDEtg	100		ACNACNGAL14ACGLCGALGLUSIDEte	100	0		AMETr	99.9471	0.461668		ABTD	96.0514	9.33213		ACOAD8m	98.0286	6.55175
ACNACNGALGBSIDEte	100		ACNACNGAL14ACGLCGALGLUSIDEtg	100	0		PCHOL_HSter	99.9471	0.461668		ABTti	96.0514	9.33213		HCO3Em	98.0286	6.55175
ACNACNGALGBSIDEtg	100		ACNACNGALGBSIDEte	100	0		PE_HSter	99.9471	0.461668		ABUTD	96.0514	9.33213		MCCCrm	98.0286	6.55175
ACNAM9PL	100		ACNACNGALGBSIDEtg	100	0		PETOHMr_hs	99.9471	0.461668		ABUTt2r	96.0514	9.33213		MGCHrm	98.0286	6.55175
ACNAM9PL2	100		ACNAM9PL	100	0		EX_chol(e)	99.9485	0.450973		ABUTt2rL	96.0514	9.33213		OIVD1m	98.0286	6.55175
ACNAMlt	100		ACNAM9PL2	100	0		MTHFR3	99.9498	0.44108		ABUTt4(2)r	96.0514	9.33213		NOS1	98.0346	6.55171
ACNAMPH	100		ACNAMlt	100	0		BETALDHxm	99.9507	0.435102		ACACT1	96.0514	9.33213		NOS2	98.0346	6.55171
ACNAMtn	100		ACNAMPH	100	0		CHLtm	99.9507	0.435102		ACACT10m	96.0514	9.33213		NOt	98.0346	6.55171
ACNGALACGLCGAL14ACGLCGALGLUSIDEte	100		ACNAMtn	100	0		CHOLD2m	99.9507	0.435102		ACACT1r	96.0514	9.33213		EX_no(e)	98.0346	6.55171
ACNGALACGLCGAL14ACGLCGALGLUSIDEtg	100		ACNGALACGLCGAL14ACGLCGALGLUSIDEte	100	0		EX_glyb(e)	99.9507	0.435102		ACACT1rm	96.0514	9.33213		EX_pe_hs(e)	98.0362	6.55174
ACNMLr	100		ACNGALACGLCGAL14ACGLCGALGLUSIDEtg	100	0		GLYBt4(2)r	99.9507	0.435102		ACACT1x	96.0514	9.33213		EX_spc_hs(e)	98.0365	6.55174
ACOAD10m	100		ACNMLr	100	0		GLYBtm	99.9507	0.435102		ACACt2	96.0514	9.33213		SPC_HSt	98.0365	6.55174
ACOAD1fm	100		ACOAD10m	100	0		AMETt2m	99.9516	0.428545		ACACt2m	96.0514	9.33213		PSDm_hs	98.0438	6.55202
ACOAD8m	100		ACOAD1fm	100	0		PCFLOPm	99.9516	0.428545		ACACT4p	96.0514	9.33213		PSFLIPm	98.0438	6.55202
ACOAD9m	100		ACOAD8m	100	0		PETOHMm_hs	99.9516	0.428545		ACACT5p	96.0514	9.33213		ACGAM6PSi	98.0486	6.55235
ACOAHi	100		ACOAD9m	100	0		EX_leu-L(e)	99.9562	0.399474		ACACT6p	96.0514	9.33213		EX_ha(e)	98.0486	6.55235
ACOAO7p	100		ACOAHi	100	0		CDPDAGtm	99.9602	0.376138		ACACT7p	96.0514	9.33213		EX_ha_pre1(e)	98.0486	6.55235
ACOATA	100		ACOAO7p	100	0		CDSm	99.9602	0.376138		ACACT8p	96.0514	9.33213		ASAH1	98.0489	6.55238
ACODA	100		ACOATA	100	0		CYTDK2m	99.9602	0.376138		ACACT9p	96.0514	9.33213		CHOLPtl	98.0489	6.55238
ACONT	100		ACODA	100	0		CYTDtm	99.9602	0.376138		ACACtx	96.0514	9.33213		Rtotaltl	98.0489	6.55238
ACONTm	100		ACONT	100	0		CYTK1m	99.9602	0.376138		ACALDt	96.0514	9.33213		SMPD3l	98.0489	6.55238
ACOX22x	100		ACONTm	100	0		NDPK3m	99.9602	0.376138		ACALDtm	96.0514	9.33213		SPHINGStl	98.0489	6.55238
ACOX2x	100		ACOX22x	100	0		PCHOLPm_hs	99.9602	0.376138		ACALDtr	96.0514	9.33213		SPHMYLNtl	98.0489	6.55238
ACP1(FMN)	100		ACOX2x	100	0		EX_lpchol_hs(e)	99.9603	0.37542		ACALDtx	96.0514	9.33213		METS	98.0718	6.5556
ACRNtm	100		ACP1(FMN)	100	0		LPCHOLt	99.9603	0.37542		ACCOAC	96.0514	9.33213		MTHFR3	98.0756	6.55641
ACS	100		ACRNtm	100	0		EX_pchol_hs(e)	99.9628	0.359218		ACCOACm	96.0514	9.33213		AHCYStr	98.0822	6.55798
ACS2	100		ACS	100	0		FACOAL160i	99.965	0.346426		ACCOAgt	96.0514	9.33213		AMETr	98.0822	6.55798
ACSm	100		ACS2	100	0		MMMm	99.9662	0.346993		ACCOAL	96.0514	9.33213		PCHOL_HSter	98.0822	6.55798
ACt2m	100		ACSm	100	0		MMTSADm	99.9662	0.346993		ACCOALm	96.0514	9.33213		PE_HSter	98.0822	6.55798
ACt2r	100		ACt2m	100	0		3HBCOAHLm	99.9662	0.346993		ACCOAtn	96.0514	9.33213		PETOHMr_hs	98.0822	6.55798
ACtg	100		ACt2r	100	0		ACOAD9m	99.9662	0.346993		ACCOAtr	96.0514	9.33213		GLNS	98.0852	6.55875
ACTLMO	100		ACtg	100	0		ECOAH12m	99.9662	0.346993		ACETONEt2	96.0514	9.33213		EX_chol(e)	98.0877	6.55945
ACTNMO	100		ACTLMO	100	0		HIBDm	99.9662	0.346993		ACETONEt2m	96.0514	9.33213		FRDPtc	98.0897	6.56002
ACYP	100		ACTNMO	100	0		OIVD2m	99.9662	0.346993		ACGAGBSIDEtg	96.0514	9.33213		FT	98.0897	6.56002
ADA	100		ACYP	100	0		SUCD1m	99.967	0.350071		ACGAGBSIDEtl	96.0514	9.33213		IPDPtx	98.0897	6.56002
ADAe	100		ADA	100	0		EX_hdca(e)	99.967	0.336925		ACGALFUCGALACGALFUC12GAL14ACGLCGALGLUSIDEte	96.0514	9.33213		HSD17B7r	98.0897	6.56002
ADCim	100		ADAe	100	0		3AIBt	99.9687	0.344763		ACGALFUCGALACGALFUC12GAL14ACGLCGALGLUSIDEtg	96.0514	9.33213		HSD17B8r	98.0897	6.56002
ADEt	100		ADCim	100	0		3AIBTm	99.9687	0.344763		ACGALFUCGALACGALFUCGALACGLCGAL14ACGLCGALGLUSIDEte	96.0514	9.33213		LGTHL	98.0897	6.56002
ADEtl	100		ADEt	100	0		3AIBtm	99.9687	0.344763		ACGALFUCGALACGALFUCGALACGLCGAL14ACGLCGALGLUSIDEtg	96.0514	9.33213		MALtm	98.0897	6.56002
ADHAPtx	100		ADEtl	100	0		EX_3aib(e)	99.9687	0.344763		ACGALtly	96.0514	9.33213		AMPDA	98.0897	6.56002
ADK1	100		ADHAPtx	100	0		EX_val-L(e)	99.9687	0.344763		ACGAM2E	96.0514	9.33213		ARTFR46	98.0897	6.56002
ADK1m	100		ADK1	100	0		VALt5m	99.969	0.344743		ACGAM6PSi	96.0514	9.33213		CO2tm	98.0897	6.56002
ADK3	100		ADK1m	100	0		VALTAm	99.969	0.344743		ACGAMK	96.0514	9.33213		CRNCARtp	98.0897	6.56002
ADK3m	100		ADK3	100	0		DHCRD2	99.9716	0.320687		ACGAMPM	96.0514	9.33213		CSNATp	98.0897	6.56002
ADKd	100		ADK3m	100	0		CITtbm	99.9725	0.320034		ACGAMtly	96.0514	9.33213		EX_lac-D(e)	98.0897	6.56002
ADMDC	100		ADKd	100	0		EX_succ(e)	99.9725	0.320034		ACGPID	96.0514	9.33213		ICDHyrm	98.0897	6.56002
ADNCYC	100		ADMDC	100	0		ME1m	99.9725	0.320034		ACHEe	96.0514	9.33213		NDP8	98.0897	6.56002
ADNK1	100		ADNCYC	100	0		ME2	99.9725	0.320034		ACHVESSEC	96.0514	9.33213		RTOT_3	98.0897	6.56002
ADNK1m	100		ADNK1	100	0		ME2m	99.9725	0.320034		ACITL	96.0514	9.33213		XOL27OHtm	98.0897	6.56002
ADNt	100		ADNK1m	100	0		PEPCK	99.9725	0.320034		ACN13ACNGALGBSIDEte	96.0514	9.33213		10FTHF5GLUtl	98.0897	6.56002
ADNt4	100		ADNt	100	0		PEPCKm	99.9725	0.320034		ACN13ACNGALGBSIDEtg	96.0514	9.33213		10FTHF5GLUtm	98.0897	6.56002
ADNt5	100		ADNt4	100	0		PYRt2m	99.9725	0.320034		ACN23ACNGALGBSIDEte	96.0514	9.33213		10FTHF6GLUtl	98.0897	6.56002
ADNtl	100		ADNt5	100	0		SUCCt2m	99.9725	0.320034		ACN23ACNGALGBSIDEtg	96.0514	9.33213		10FTHF6GLUtm	98.0897	6.56002
ADNtm	100		ADNtl	100	0		4HOXPACDOX(NADP)	99.9739	0.316806		ACNACNGAL14ACGLCGALGLUSIDEte	96.0514	9.33213		10FTHF7GLUtl	98.0897	6.56002
ADPGLC	100		ADNtm	100	0		EX_4hphac(e)	99.9739	0.316806		ACNACNGAL14ACGLCGALGLUSIDEtg	96.0514	9.33213		10FTHF7GLUtm	98.0897	6.56002
ADPMAN	100		ADPGLC	100	0		HPACtr	99.9739	0.316806		ACNACNGALGBSIDEte	96.0514	9.33213		10FTHFtl	98.0897	6.56002
ADPRDP	100		ADPMAN	100	0		TYRCBOX	99.9739	0.316806		ACNACNGALGBSIDEtg	96.0514	9.33213		10FTHFtm	98.0897	6.56002
ADPRDPm	100		ADPRDP	100	0		TYROXDAc	99.9739	0.316806		ACNAM9PL	96.0514	9.33213		13DAMPPOX	98.0897	6.56002
ADPRIBt	100		ADPRDPm	100	0		ORNTArm	99.9752	0.315947		ACNAM9PL2	96.0514	9.33213		1a,24,25VITD2Hm	98.0897	6.56002
ADPT	100		ADPRIBt	100	0		THFtm	99.9754	0.315222		ACNAMlt	96.0514	9.33213		1a,24,25VITD3Hm	98.0897	6.56002
ADPtx	100		ADPT	100	0		GLYtm	99.9754	0.315208		ACNAMPH	96.0514	9.33213		1a,25VITD2Hm	98.0897	6.56002
ADRNCOAtx	100		ADPtx	100	0		MTHFCm	99.9754	0.315208		ACNAMtn	96.0514	9.33213		1a,25VITD3Hm	98.0897	6.56002
ADRNCPT1	100		ADRNCOAtx	100	0		ICDHyrm	99.9759	0.315029		ACNGALACGLCGAL14ACGLCGALGLUSIDEte	96.0514	9.33213		1MNCAMti	98.0897	6.56002
ADRNCPT2	100		ADRNCPT1	100	0		ACONTm	99.9759	0.315029		ACNGALACGLCGAL14ACGLCGALGLUSIDEtg	96.0514	9.33213		24,25DHVITD2t	98.0897	6.56002
ADRNCRNt	100		ADRNCPT2	100	0		TALA	99.976	0.315016		ACNMLr	96.0514	9.33213		24,25DHVITD2tm	98.0897	6.56002
ADRNLPVESSEC	100		ADRNCRNt	100	0		10FTHF5GLUtl	99.976	0.315016		ACOAD10m	96.0514	9.33213		24,25DHVITD3t	98.0897	6.56002
ADRNt	100		ADRNLPVESSEC	100	0		10FTHF5GLUtm	99.976	0.315016		ACOAD1fm	96.0514	9.33213		24,25DHVITD3tm	98.0897	6.56002
ADSELK	100		ADRNt	100	0		10FTHF6GLUtl	99.976	0.315016		ACOAHi	96.0514	9.33213		24,25VITD2Hm	98.0897	6.56002
ADSK	100		ADSELK	100	0		10FTHF6GLUtm	99.976	0.315016		ACOAO7p	96.0514	9.33213		24,25VITD3Hm	98.0897	6.56002
AFLATOXINte	100		ADSK	100	0		10FTHF7GLUtl	99.976	0.315016		ACOATA	96.0514	9.33213		24NPHte	98.0897	6.56002
AG13T10g	100		AFLATOXINte	100	0		10FTHF7GLUtm	99.976	0.315016		ACODA	96.0514	9.33213		25HVITD2t	98.0897	6.56002
AG13T11g	100		AG13T10g	100	0		10FTHFtl	99.976	0.315016		ACONT	96.0514	9.33213		25HVITD2tin	98.0897	6.56002
AG13T12g	100		AG13T11g	100	0		10FTHFtm	99.976	0.315016		ACONTm	96.0514	9.33213		25HVITD2tin-m	98.0897	6.56002
AG13T13g	100		AG13T12g	100	0		13DAMPPOX	99.976	0.315016		ACOX22x	96.0514	9.33213		25HVITD2tm	98.0897	6.56002
AG13T14g	100		AG13T13g	100	0		1a,24,25VITD2Hm	99.976	0.315016		ACOX2x	96.0514	9.33213		25HVITD3t	98.0897	6.56002
AG13T15g	100		AG13T14g	100	0		1a,24,25VITD3Hm	99.976	0.315016		ACP1(FMN)	96.0514	9.33213		25HVITD3tin	98.0897	6.56002
AG13T16g	100		AG13T15g	100	0		1a,25VITD2Hm	99.976	0.315016		ACRNtm	96.0514	9.33213		25HVITD3tin-m	98.0897	6.56002
AG13T17g	100		AG13T16g	100	0		1a,25VITD3Hm	99.976	0.315016		ACS	96.0514	9.33213		25HVITD3tm	98.0897	6.56002
AG13T18g	100		AG13T17g	100	0		1MNCAMti	99.976	0.315016		ACS2	96.0514	9.33213		25VITD2Hm	98.0897	6.56002
AG13T1g	100		AG13T18g	100	0		24,25DHVITD2t	99.976	0.315016		ACSm	96.0514	9.33213		25VITD3Hm	98.0897	6.56002
AG13T2g	100		AG13T1g	100	0		24,25DHVITD2tm	99.976	0.315016		ACt2m	96.0514	9.33213		2DR1PP	98.0897	6.56002
AG13T3g	100		AG13T2g	100	0		24,25DHVITD3t	99.976	0.315016		ACt2r	96.0514	9.33213		2HCO3_NAt	98.0897	6.56002
AG13T4g	100		AG13T3g	100	0		24,25DHVITD3tm	99.976	0.315016		ACtg	96.0514	9.33213		2OXOADOXm	98.0897	6.56002
AG13T5g	100		AG13T4g	100	0		24,25VITD2Hm	99.976	0.315016		ACTLMO	96.0514	9.33213		2OXOADPTm	98.0897	6.56002
AG13T6g	100		AG13T5g	100	0		24,25VITD3Hm	99.976	0.315016		ACTNMO	96.0514	9.33213		34DHPHAMT	98.0897	6.56002
AG13T7g	100		AG13T6g	100	0		24NPHte	99.976	0.315016		ACYP	96.0514	9.33213		34DHPLACOX	98.0897	6.56002
AG13T8g	100		AG13T7g	100	0		25HVITD2t	99.976	0.315016		ADA	96.0514	9.33213		34DHPLACOX(NADP)	98.0897	6.56002
AG13T9g	100		AG13T8g	100	0		25HVITD2tin	99.976	0.315016		ADAe	96.0514	9.33213		34HPLFM	98.0897	6.56002
AGLPC	100		AG13T9g	100	0		25HVITD2tin-m	99.976	0.315016		ADCim	96.0514	9.33213		35CGMPtn	98.0897	6.56002
AGLPED	100		AGLPC	100	0		25HVITD2tm	99.976	0.315016		ADEt	96.0514	9.33213		3DPHBH1	98.0897	6.56002
AGLPET	100		AGLPED	100	0		25HVITD3t	99.976	0.315016		ADEtl	96.0514	9.33213		3DPHBH2	98.0897	6.56002
AGLPH	100		AGLPET	100	0		25HVITD3tin	99.976	0.315016		ADHAPtx	96.0514	9.33213		3HAO	98.0897	6.56002
AGLPR	100		AGLPH	100	0		25HVITD3tin-m	99.976	0.315016		ADK1	96.0514	9.33213		3HBCDm	98.0897	6.56002
AGLPT	100		AGLPR	100	0		25HVITD3tm	99.976	0.315016		ADK1m	96.0514	9.33213		3HCO3_NAt	98.0897	6.56002
AGMTm	100		AGLPT	100	0		25VITD2Hm	99.976	0.315016		ADK3	96.0514	9.33213		3HLYTCL	98.0897	6.56002
AGPAT1	100		AGMTm	100	0		25VITD3Hm	99.976	0.315016		ADK3m	96.0514	9.33213		3HPCOAHYD	98.0897	6.56002
AGPex	100		AGPAT1	100	0		2DR1PP	99.976	0.315016		ADKd	96.0514	9.33213		3HXKYNDCL	98.0897	6.56002
AGPRim	100		AGPex	100	0		2HCO3_NAt	99.976	0.315016		ADMDC	96.0514	9.33213		3HXKYNOXDA	98.0897	6.56002
AGPSx	100		AGPRim	100	0		2OXOADOXm	99.976	0.315016		ADNCYC	96.0514	9.33213		3M4HDXPAC	98.0897	6.56002
AHANDROSTANGLCte	100		AGPSx	100	0		2OXOADPTm	99.976	0.315016		ADNK1	96.0514	9.33213		3MOBt2im	98.0897	6.56002
AHANDROSTANGLCtr	100		AHANDROSTANGLCte	100	0		34DHPHAMT	99.976	0.315016		ADNK1m	96.0514	9.33213		3MOPt2im	98.0897	6.56002
AHC	100		AHANDROSTANGLCtr	100	0		34DHPLACOX	99.976	0.315016		ADNt	96.0514	9.33213		3MOX4HOXPGALDOX	98.0897	6.56002
AHCYStn	100		AHC	100	0		34DHPLACOX(NADP)	99.976	0.315016		ADNt4	96.0514	9.33213		3MOX4HOXPGALDOX(NADP)	98.0897	6.56002
AHCYStr	100		AHCYStn	100	0		34HPLFM	99.976	0.315016		ADNt5	96.0514	9.33213		3MOXTYROX	98.0897	6.56002
AHEXASE2ly	100		AHCYStr	100	0		35CGMPtn	99.976	0.315016		ADNtl	96.0514	9.33213		3NTD7l	98.0897	6.56002
AHEXASEly	100		AHEXASE2ly	100	0		3DPHBH1	99.976	0.315016		ADNtm	96.0514	9.33213		3SALAASPm	98.0897	6.56002
AK2LGCHOLt	100		AHEXASEly	100	0		3DPHBH2	99.976	0.315016		ADPGLC	96.0514	9.33213		3SALATAi	98.0897	6.56002
AKGDm	100		AK2LGCHOLt	100	0		3HAO	99.976	0.315016		ADPMAN	96.0514	9.33213		3SALATAim	98.0897	6.56002
AKGMALtm	100		AKGDm	100	0		3HBCDm	99.976	0.315016		ADPRDP	96.0514	9.33213		41R1H2MAE12BOOX	98.0897	6.56002
AKGt4_3	100		AKGMALtm	100	0		3HCO3_NAt	99.976	0.315016		ADPRDPm	96.0514	9.33213		41R2A1H12BOOX	98.0897	6.56002
AKGtp	100		AKGt4_3	100	0		3HLYTCL	99.976	0.315016		ADPRIBt	96.0514	9.33213		42A12BOOX	98.0897	6.56002
AKR1C41	100		AKGtp	100	0		3HPCOAHYD	99.976	0.315016		ADPT	96.0514	9.33213		4ABUTtm	98.0897	6.56002
AKR1C42	100		AKR1C41	100	0		3HXKYNDCL	99.976	0.315016		ADPtx	96.0514	9.33213		4HBZCOAFm	98.0897	6.56002
ALAASNNaEx	100		AKR1C42	100	0		3HXKYNOXDA	99.976	0.315016		ADRNCOAtx	96.0514	9.33213		4HBZFm	98.0897	6.56002
ALACYSNaEx	100		ALAASNNaEx	100	0		3M4HDXPAC	99.976	0.315016		ADRNCPT1	96.0514	9.33213		4HDEBRISOQUINEte	98.0897	6.56002
ALADGLNexR	100		ALACYSNaEx	100	0		3MOBt2im	99.976	0.315016		ADRNCPT2	96.0514	9.33213		4HGLSDm	98.0897	6.56002
ALADGLYexR	100		ALADGLNexR	100	0		3MOPt2im	99.976	0.315016		ADRNCRNt	96.0514	9.33213		4HOXPACDOX(NADP)	98.0897	6.56002
ALAGLNexR	100		ALADGLYexR	100	0		3MOX4HOXPGALDOX	99.976	0.315016		ADRNLPVESSEC	96.0514	9.33213		4MOPt2im	98.0897	6.56002
ALAGLNNaEx	100		ALAGLNexR	100	0		3MOX4HOXPGALDOX(NADP)	99.976	0.315016		ADRNt	96.0514	9.33213		4MPTNLte	98.0897	6.56002
ALAGLYexR	100		ALAGLNNaEx	100	0		3MOXTYROX	99.976	0.315016		ADSELK	96.0514	9.33213		4MPTNLtm	98.0897	6.56002
ALAR	100		ALAGLYexR	100	0		3NTD7l	99.976	0.315016		ADSK	96.0514	9.33213		4MPTNLtr	98.0897	6.56002
ALASERNaEx	100		ALAR	100	0		3SALAASPm	99.976	0.315016		AFLATOXINte	96.0514	9.33213		4NPHSFte	98.0897	6.56002
ALASm	100		ALASERNaEx	100	0		3SALATAi	99.976	0.315016		AG13T10g	96.0514	9.33213		4NPHSULT	98.0897	6.56002
ALAt2r	100		ALASm	100	0		3SALATAim	99.976	0.315016		AG13T11g	96.0514	9.33213		4NPHte	98.0897	6.56002
ALAt2rL	100		ALAt2r	100	0		41R1H2MAE12BOOX	99.976	0.315016		AG13T12g	96.0514	9.33213		4PYRDX	98.0897	6.56002
ALAt4	100		ALAt2rL	100	0		41R2A1H12BOOX	99.976	0.315016		AG13T13g	96.0514	9.33213		5ADTSTSTERONEGLCte	98.0897	6.56002
ALATA_L	100		ALAt4	100	0		42A12BOOX	99.976	0.315016		AG13T14g	96.0514	9.33213		5ADTSTSTERONEGLCtr	98.0897	6.56002
ALATHRNaEx	100		ALATA_L	100	0		4ABUTtm	99.976	0.315016		AG13T15g	96.0514	9.33213		5ADTSTSTERONEte	98.0897	6.56002
ALAtN1	100		ALATHRNaEx	100	0		4HBZCOAFm	99.976	0.315016		AG13T16g	96.0514	9.33213		5ADTSTSTERONEtr	98.0897	6.56002
ALCD1	100		ALAtN1	100	0		4HBZFm	99.976	0.315016		AG13T17g	96.0514	9.33213		5DHFtl	98.0897	6.56002
ALCD21_D	100		ALCD1	100	0		4HDEBRISOQUINEte	99.976	0.315016		AG13T18g	96.0514	9.33213		5FTHFt2	98.0897	6.56002
ALCD21_L	100		ALCD21_D	100	0		4HGLSDm	99.976	0.315016		AG13T1g	96.0514	9.33213		5HOXINDACTO2OX	98.0897	6.56002
ALCD22_D	100		ALCD21_L	100	0		4MOPt2im	99.976	0.315016		AG13T2g	96.0514	9.33213		5HOXINDACTOX	98.0897	6.56002
ALCD22_L	100		ALCD22_D	100	0		4MPTNLte	99.976	0.315016		AG13T3g	96.0514	9.33213		5HOXINDACTOXm	98.0897	6.56002
ALCD2yf	100		ALCD22_L	100	0		4MPTNLtm	99.976	0.315016		AG13T4g	96.0514	9.33213		5HOXINOXDA	98.0897	6.56002
ALDD20x	100		ALCD2yf	100	0		4MPTNLtr	99.976	0.315016		AG13T5g	96.0514	9.33213		5HTRPDOX	98.0897	6.56002
ALDD20xm	100		ALDD20x	100	0		4NPHSFte	99.976	0.315016		AG13T6g	96.0514	9.33213		5HXKYNDCL	98.0897	6.56002
ALDD21	100		ALDD20xm	100	0		4NPHSULT	99.976	0.315016		AG13T7g	96.0514	9.33213		5HXKYNOXDA	98.0897	6.56002
ALDD2x	100		ALDD21	100	0		4NPHte	99.976	0.315016		AG13T8g	96.0514	9.33213		5MTHFt	98.0897	6.56002
ALDD2xm	100		ALDD2x	100	0		4PYRDX	99.976	0.315016		AG13T9g	96.0514	9.33213		5MTHFt2	98.0897	6.56002
ALDD2y	100		ALDD2xm	100	0		5ADTSTSTERONEGLCte	99.976	0.315016		AGLPC	96.0514	9.33213		5THFtl	98.0897	6.56002
ALDSTRNte	100		ALDD2y	100	0		5ADTSTSTERONEGLCtr	99.976	0.315016		AGLPED	96.0514	9.33213		5THFtm	98.0897	6.56002
ALKP	100		ALDSTRNte	100	0		5ADTSTSTERONEte	99.976	0.315016		AGLPET	96.0514	9.33213		6DHFtl	98.0897	6.56002
ALOX12	100		ALKP	100	0		5ADTSTSTERONEtr	99.976	0.315016		AGLPH	96.0514	9.33213		6DHFtm	98.0897	6.56002
ALOX12R	100		ALOX12	100	0		5DHFtl	99.976	0.315016		AGLPR	96.0514	9.33213		6HTSTSTERONEte	98.0897	6.56002
ALOX15	100		ALOX12R	100	0		5FTHFt2	99.976	0.315016		AGLPT	96.0514	9.33213		6THFtl	98.0897	6.56002
ALOX5	100		ALOX15	100	0		5HOXINDACTO2OX	99.976	0.315016		AGMTm	96.0514	9.33213		6THFtm	98.0897	6.56002
ALOX52	100		ALOX5	100	0		5HOXINDACTOX	99.976	0.315016		AGPAT1	96.0514	9.33213		7DHCHSTEROLtr	98.0897	6.56002
ALR	100		ALOX52	100	0		5HOXINDACTOXm	99.976	0.315016		AGPex	96.0514	9.33213		7DHFtl	98.0897	6.56002
ALR2	100		ALR	100	0		5HOXINOXDA	99.976	0.315016		AGPRim	96.0514	9.33213		7DHFtm	98.0897	6.56002
ALR3	100		ALR2	100	0		5HTRPDOX	99.976	0.315016		AGPSx	96.0514	9.33213		7THFtl	98.0897	6.56002
AM6SAD	100		ALR3	100	0		5HXKYNDCL	99.976	0.315016		AHANDROSTANGLCte	96.0514	9.33213		7THFtm	98.0897	6.56002
AMACR2p	100		AM6SAD	100	0		5HXKYNOXDA	99.976	0.315016		AHANDROSTANGLCtr	96.0514	9.33213		A_MANASE	98.0897	6.56002
AMACR2r	100		AMACR2p	100	0		5MTHFt	99.976	0.315016		AHCYStn	96.0514	9.33213		A_MANASEly	98.0897	6.56002
AMACRp	100		AMACR2r	100	0		5MTHFt2	99.976	0.315016		AHCYStr	96.0514	9.33213		A4GALTc	98.0897	6.56002
AMACRr	100		AMACRp	100	0		5THFtl	99.976	0.315016		AHEXASE2ly	96.0514	9.33213		A4GALTg	98.0897	6.56002
AMANK	100		AMACRr	100	0		5THFtm	99.976	0.315016		AHEXASEly	96.0514	9.33213		AACOAT	98.0897	6.56002
AMCOXO	100		AMANK	100	0		6DHFtl	99.976	0.315016		AK2LGCHOLt	96.0514	9.33213		ABO1g	98.0897	6.56002
AMETr	100		AMCOXO	100	0		6DHFtm	99.976	0.315016		AKGDm	96.0514	9.33213		ABO2g	98.0897	6.56002
AMETt2m	100		AMETr	100	0		6HTSTSTERONEte	99.976	0.315016		AKGMALtm	96.0514	9.33213		ABO3g	98.0897	6.56002
AMETtn	100		AMETt2m	100	0		6THFtl	99.976	0.315016		AKGt4_3	96.0514	9.33213		ABO4g	98.0897	6.56002
AMPDA	100		AMETtn	100	0		6THFtm	99.976	0.315016		AKGtp	96.0514	9.33213		ABO5g	98.0897	6.56002
AMPTASECG	100		AMPDA	100	0		7DHCHSTEROLtr	99.976	0.315016		AKR1C41	96.0514	9.33213		ABO6g	98.0897	6.56002
AMPTASECGe	100		AMPTASECG	100	0		7DHFtl	99.976	0.315016		AKR1C42	96.0514	9.33213		ABO7g	98.0897	6.56002
AMPtp	100		AMPTASECGe	100	0		7DHFtm	99.976	0.315016		ALAASNNaEx	96.0514	9.33213		ABO8g	98.0897	6.56002
AMPtr	100		AMPtp	100	0		7THFtl	99.976	0.315016		ALACYSNaEx	96.0514	9.33213		ABO9g	98.0897	6.56002
AMY1e	100		AMPtr	100	0		7THFtm	99.976	0.315016		ALADGLNexR	96.0514	9.33213		ABTArm	98.0897	6.56002
AMY2e	100		AMY1e	100	0		A_MANASE	99.976	0.315016		ALADGLYexR	96.0514	9.33213		ABTD	98.0897	6.56002
ANDRSTRNGLCte	100		AMY2e	100	0		A_MANASEly	99.976	0.315016		ALAGLNexR	96.0514	9.33213		ABTti	98.0897	6.56002
ANDRSTRNGLCtr	100		ANDRSTRNGLCte	100	0		A4GALTc	99.976	0.315016		ALAGLNNaEx	96.0514	9.33213		ABUTD	98.0897	6.56002
ANDRSTRNte	100		ANDRSTRNGLCtr	100	0		A4GALTg	99.976	0.315016		ALAGLYexR	96.0514	9.33213		ABUTt2r	98.0897	6.56002
ANDRSTRNtr	100		ANDRSTRNte	100	0		AACOAT	99.976	0.315016		ALASERNaEx	96.0514	9.33213		ABUTt2rL	98.0897	6.56002
AP4AH1	100		ANDRSTRNtr	100	0		ABO1g	99.976	0.315016		ALASm	96.0514	9.33213		ABUTt4(2)r	98.0897	6.56002
APAT2rm	100		AP4AH1	100	0		ABO2g	99.976	0.315016		ALAt2r	96.0514	9.33213		ACACT1	98.0897	6.56002
APRTO2	100		APAT2rm	100	0		ABO3g	99.976	0.315016		ALAt2rL	96.0514	9.33213		ACACT10m	98.0897	6.56002
AQCOBALt	100		APRTO2	100	0		ABO4g	99.976	0.315016		ALAt4	96.0514	9.33213		ACACT1r	98.0897	6.56002
ARAB-Lt	100		AQCOBALt	100	0		ABO5g	99.976	0.315016		ALATHRNaEx	96.0514	9.33213		ACACT1rm	98.0897	6.56002
ARABR	100		ARAB-Lt	100	0		ABO6g	99.976	0.315016		ALAtN1	96.0514	9.33213		ACACT1x	98.0897	6.56002
ARACHCOAtx	100		ARABR	100	0		ABO7g	99.976	0.315016		ALCD1	96.0514	9.33213		ACACt2	98.0897	6.56002
ARACHCPT1	100		ARACHCOAtx	100	0		ABO8g	99.976	0.315016		ALCD21_D	96.0514	9.33213		ACACt2m	98.0897	6.56002
ARACHCPT2	100		ARACHCPT1	100	0		ABO9g	99.976	0.315016		ALCD21_L	96.0514	9.33213		ACACT4p	98.0897	6.56002
ARACHCRNt	100		ARACHCPT2	100	0		ABTArm	99.976	0.315016		ALCD22_D	96.0514	9.33213		ACACT5p	98.0897	6.56002
ARACHDCOAtx	100		ARACHCRNt	100	0		ABTD	99.976	0.315016		ALCD22_L	96.0514	9.33213		ACACT6p	98.0897	6.56002
ARACHDt2	100		ARACHDCOAtx	100	0		ABTti	99.976	0.315016		ALCD2yf	96.0514	9.33213		ACACT7p	98.0897	6.56002
ARACHDtr	100		ARACHDt2	100	0		ABUTD	99.976	0.315016		ALDD20x	96.0514	9.33213		ACACT8p	98.0897	6.56002
ARACHt	100		ARACHDtr	100	0		ABUTt2r	99.976	0.315016		ALDD20xm	96.0514	9.33213		ACACT9p	98.0897	6.56002
ARGDCm	100		ARACHt	100	0		ABUTt2rL	99.976	0.315016		ALDD21	96.0514	9.33213		ACACtx	98.0897	6.56002
ARGLYSex	100		ARGDCm	100	0		ABUTt4(2)r	99.976	0.315016		ALDD2x	96.0514	9.33213		ACALDt	98.0897	6.56002
ARGN	100		ARGLYSex	100	0		ACACT1	99.976	0.315016		ALDD2xm	96.0514	9.33213		ACALDtm	98.0897	6.56002
ARGNm	100		ARGN	100	0		ACACT10m	99.976	0.315016		ALDD2y	96.0514	9.33213		ACALDtr	98.0897	6.56002
ARGSL	100		ARGNm	100	0		ACACT1r	99.976	0.315016		ALDSTRNte	96.0514	9.33213		ACALDtx	98.0897	6.56002
ARGSS	100		ARGSL	100	0		ACACT1rm	99.976	0.315016		ALKP	96.0514	9.33213		ACCOAC	98.0897	6.56002
ARGt4	100		ARGSS	100	0		ACACT1x	99.976	0.315016		ALOX12	96.0514	9.33213		ACCOACm	98.0897	6.56002
ARGtiDF	100		ARGt4	100	0		ACACt2	99.976	0.315016		ALOX12R	96.0514	9.33213		ACCOAgt	98.0897	6.56002
ARGtm	100		ARGtiDF	100	0		ACACt2m	99.976	0.315016		ALOX15	96.0514	9.33213		ACCOAL	98.0897	6.56002
ARSA	100		ARGtm	100	0		ACACT4p	99.976	0.315016		ALOX5	96.0514	9.33213		ACCOALm	98.0897	6.56002
ARTCOAL1	100		ARSA	100	0		ACACT5p	99.976	0.315016		ALOX52	96.0514	9.33213		ACCOAtn	98.0897	6.56002
ARTCOAL2	100		ARTCOAL1	100	0		ACACT6p	99.976	0.315016		ALR	96.0514	9.33213		ACCOAtr	98.0897	6.56002
ARTCOAL3	100		ARTCOAL2	100	0		ACACT7p	99.976	0.315016		ALR2	96.0514	9.33213		ACETONEt2	98.0897	6.56002
ARTFR11	100		ARTCOAL3	100	0		ACACT8p	99.976	0.315016		ALR3	96.0514	9.33213		ACETONEt2m	98.0897	6.56002
ARTFR12	100		ARTFR11	100	0		ACACT9p	99.976	0.315016		AM6SAD	96.0514	9.33213		ACGAGBSIDEtg	98.0897	6.56002
ARTFR13	100		ARTFR12	100	0		ACACtx	99.976	0.315016		AMACR2p	96.0514	9.33213		ACGAGBSIDEtl	98.0897	6.56002
ARTFR202	100		ARTFR13	100	0		ACALDt	99.976	0.315016		AMACR2r	96.0514	9.33213		ACGALFUCGALACGALFUC12GAL14ACGLCGALGLUSIDEte	98.0897	6.56002
ARTFR203	100		ARTFR202	100	0		ACALDtm	99.976	0.315016		AMACRp	96.0514	9.33213		ACGALFUCGALACGALFUC12GAL14ACGLCGALGLUSIDEtg	98.0897	6.56002
ARTFR204	100		ARTFR203	100	0		ACALDtr	99.976	0.315016		AMACRr	96.0514	9.33213		ACGALFUCGALACGALFUCGALACGLCGAL14ACGLCGALGLUSIDEte	98.0897	6.56002
ARTFR205	100		ARTFR204	100	0		ACALDtx	99.976	0.315016		AMANK	96.0514	9.33213		ACGALFUCGALACGALFUCGALACGLCGAL14ACGLCGALGLUSIDEtg	98.0897	6.56002
ARTFR206	100		ARTFR205	100	0		ACCOAC	99.976	0.315016		AMCOXO	96.0514	9.33213		ACGALtly	98.0897	6.56002
ARTFR207	100		ARTFR206	100	0		ACCOACm	99.976	0.315016		AMETr	96.0514	9.33213		ACGAM2E	98.0897	6.56002
ARTFR208	100		ARTFR207	100	0		ACCOAgt	99.976	0.315016		AMETt2m	96.0514	9.33213		ACGAMK	98.0897	6.56002
ARTFR209	100		ARTFR208	100	0		ACCOAL	99.976	0.315016		AMETtn	96.0514	9.33213		ACGAMPM	98.0897	6.56002
ARTFR210	100		ARTFR209	100	0		ACCOALm	99.976	0.315016		AMPDA	96.0514	9.33213		ACGAMtly	98.0897	6.56002
ARTFR211	100		ARTFR210	100	0		ACCOAtn	99.976	0.315016		AMPTASECG	96.0514	9.33213		ACGPID	98.0897	6.56002
ARTFR212	100		ARTFR211	100	0		ACCOAtr	99.976	0.315016		AMPTASECGe	96.0514	9.33213		ACHEe	98.0897	6.56002
ARTFR213	100		ARTFR212	100	0		ACETONEt2m	99.976	0.315016		AMPtp	96.0514	9.33213		ACHVESSEC	98.0897	6.56002
ARTFR31	100		ARTFR213	100	0		ACGAGBSIDEtg	99.976	0.315016		AMPtr	96.0514	9.33213		ACITL	98.0897	6.56002
ARTFR32	100		ARTFR31	100	0		ACGAGBSIDEtl	99.976	0.315016		AMY1e	96.0514	9.33213		ACN13ACNGALGBSIDEte	98.0897	6.56002
ARTFR33	100		ARTFR32	100	0		ACGALFUCGALACGALFUC12GAL14ACGLCGALGLUSIDEte	99.976	0.315016		AMY2e	96.0514	9.33213		ACN13ACNGALGBSIDEtg	98.0897	6.56002
ARTFR34	100		ARTFR33	100	0		ACGALFUCGALACGALFUC12GAL14ACGLCGALGLUSIDEtg	99.976	0.315016		ANDRSTRNGLCte	96.0514	9.33213		ACN23ACNGALGBSIDEte	98.0897	6.56002
ARTFR41	100		ARTFR34	100	0		ACGALFUCGALACGALFUCGALACGLCGAL14ACGLCGALGLUSIDEte	99.976	0.315016		ANDRSTRNGLCtr	96.0514	9.33213		ACN23ACNGALGBSIDEtg	98.0897	6.56002
ARTFR42	100		ARTFR41	100	0		ACGALFUCGALACGALFUCGALACGLCGAL14ACGLCGALGLUSIDEtg	99.976	0.315016		ANDRSTRNte	96.0514	9.33213		ACNACNGAL14ACGLCGALGLUSIDEte	98.0897	6.56002
ARTFR43	100		ARTFR42	100	0		ACGALtly	99.976	0.315016		ANDRSTRNtr	96.0514	9.33213		ACNACNGAL14ACGLCGALGLUSIDEtg	98.0897	6.56002
ARTFR44	100		ARTFR43	100	0		ACGAM2E	99.976	0.315016		AP4AH1	96.0514	9.33213		ACNACNGALGBSIDEte	98.0897	6.56002
ARTFR45	100		ARTFR44	100	0		ACGAMK	99.976	0.315016		APAT2rm	96.0514	9.33213		ACNACNGALGBSIDEtg	98.0897	6.56002
ARTFR46	100		ARTFR45	100	0		ACGAMPM	99.976	0.315016		APRTO2	96.0514	9.33213		ACNAM9PL	98.0897	6.56002
ARTFR61	100		ARTFR46	100	0		ACGAMtly	99.976	0.315016		AQCOBALt	96.0514	9.33213		ACNAM9PL2	98.0897	6.56002
ARTPLM1	100		ARTFR61	100	0		ACGPID	99.976	0.315016		ARAB-Lt	96.0514	9.33213		ACNAMlt	98.0897	6.56002
ARTPLM1m	100		ARTPLM1	100	0		ACHEe	99.976	0.315016		ARABR	96.0514	9.33213		ACNAMPH	98.0897	6.56002
ARTPLM2	100		ARTPLM1m	100	0		ACHVESSEC	99.976	0.315016		ARACHCOAtx	96.0514	9.33213		ACNAMtn	98.0897	6.56002
ARTPLM2m	100		ARTPLM2	100	0		ACITL	99.976	0.315016		ARACHCPT1	96.0514	9.33213		ACNGALACGLCGAL14ACGLCGALGLUSIDEte	98.0897	6.56002
ARTPLM3	100		ARTPLM2m	100	0		ACN13ACNGALGBSIDEte	99.976	0.315016		ARACHCPT2	96.0514	9.33213		ACNGALACGLCGAL14ACGLCGALGLUSIDEtg	98.0897	6.56002
ARTPLM3m	100		ARTPLM3	100	0		ACN13ACNGALGBSIDEtg	99.976	0.315016		ARACHCRNt	96.0514	9.33213		ACNMLr	98.0897	6.56002
ASAH1	100		ARTPLM3m	100	0		ACN23ACNGALGBSIDEte	99.976	0.315016		ARACHDCOAtx	96.0514	9.33213		ACOAD10m	98.0897	6.56002
ASCBOX	100		ASAH1	100	0		ACN23ACNGALGBSIDEtg	99.976	0.315016		ARACHDt2	96.0514	9.33213		ACOAD1fm	98.0897	6.56002
ASCBt	100		ASCBOX	100	0		ACNACNGAL14ACGLCGALGLUSIDEte	99.976	0.315016		ARACHDtr	96.0514	9.33213		ACOAHi	98.0897	6.56002
ASCBt4	100		ASCBt	100	0		ACNACNGAL14ACGLCGALGLUSIDEtg	99.976	0.315016		ARACHt	96.0514	9.33213		ACOAO7p	98.0897	6.56002
Asn-X-Ser/Thrtr	100		ASCBt4	100	0		ACNACNGALGBSIDEte	99.976	0.315016		ARGDCm	96.0514	9.33213		ACOATA	98.0897	6.56002
ASNALANaEx	100		Asn-X-Ser/Thrtr	100	0		ACNACNGALGBSIDEtg	99.976	0.315016		ARGLYSex	96.0514	9.33213		ACODA	98.0897	6.56002
ASNCYSNaEx	100		ASNALANaEx	100	0		ACNAM9PL	99.976	0.315016		ARGN	96.0514	9.33213		ACONT	98.0897	6.56002
ASNGLNNaEx	100		ASNCYSNaEx	100	0		ACNAM9PL2	99.976	0.315016		ARGNm	96.0514	9.33213		ACONTm	98.0897	6.56002
ASNNm	100		ASNGLNNaEx	100	0		ACNAMlt	99.976	0.315016		ARGSL	96.0514	9.33213		ACOX22x	98.0897	6.56002
ASNS1	100		ASNNm	100	0		ACNAMPH	99.976	0.315016		ARGSS	96.0514	9.33213		ACOX2x	98.0897	6.56002
ASNSERNaEx	100		ASNS1	100	0		ACNAMtn	99.976	0.315016		ARGt4	96.0514	9.33213		ACP1(FMN)	98.0897	6.56002
ASNt4	100		ASNSERNaEx	100	0		ACNGALACGLCGAL14ACGLCGALGLUSIDEte	99.976	0.315016		ARGtiDF	96.0514	9.33213		ACRNtm	98.0897	6.56002
ASNTHRNaEx	100		ASNt4	100	0		ACNGALACGLCGAL14ACGLCGALGLUSIDEtg	99.976	0.315016		ARGtm	96.0514	9.33213		ACS	98.0897	6.56002
ASNtm	100		ASNTHRNaEx	100	0		ACNMLr	99.976	0.315016		ARSA	96.0514	9.33213		ACS2	98.0897	6.56002
ASNtN1	100		ASNtm	100	0		ACOAD10m	99.976	0.315016		ARTCOAL1	96.0514	9.33213		ACSm	98.0897	6.56002
ASPDt6	100		ASNtN1	100	0		ACOAD1fm	99.976	0.315016		ARTCOAL2	96.0514	9.33213		ACt2m	98.0897	6.56002
ASPDxt	100		ASPDt6	100	0		ACOAHi	99.976	0.315016		ARTCOAL3	96.0514	9.33213		ACt2r	98.0897	6.56002
ASPGLUm	100		ASPDxt	100	0		ACOAO7p	99.976	0.315016		ARTFR11	96.0514	9.33213		ACtg	98.0897	6.56002
ASPt6	100		ASPGLUm	100	0		ACOATA	99.976	0.315016		ARTFR12	96.0514	9.33213		ACTLMO	98.0897	6.56002
ASPTA	100		ASPt6	100	0		ACODA	99.976	0.315016		ARTFR13	96.0514	9.33213		ACTNMO	98.0897	6.56002
ASPTAm	100		ASPTA	100	0		ACONT	99.976	0.315016		ARTFR202	96.0514	9.33213		ACYP	98.0897	6.56002
ATP1ter	100		ASPTAm	100	0		ACOX22x	99.976	0.315016		ARTFR203	96.0514	9.33213		ADA	98.0897	6.56002
ATP2ter	100		ATP1ter	100	0		ACOX2x	99.976	0.315016		ARTFR204	96.0514	9.33213		ADAe	98.0897	6.56002
ATPasel	100		ATP2ter	100	0		ACP1(FMN)	99.976	0.315016		ARTFR205	96.0514	9.33213		ADCim	98.0897	6.56002
ATPH1e	100		ATPasel	100	0		ACRNtm	99.976	0.315016		ARTFR206	96.0514	9.33213		ADEtl	98.0897	6.56002
ATPH2e	100		ATPH1e	100	0		ACS	99.976	0.315016		ARTFR207	96.0514	9.33213		ADHAPtx	98.0897	6.56002
ATPS4m	100		ATPH2e	100	0		ACS2	99.976	0.315016		ARTFR208	96.0514	9.33213		ADK1	98.0897	6.56002
ATPtm	100		ATPS4m	100	0		ACSm	99.976	0.315016		ARTFR209	96.0514	9.33213		ADK1m	98.0897	6.56002
ATPtn	100		ATPtm	100	0		ACt2m	99.976	0.315016		ARTFR210	96.0514	9.33213		ADK3	98.0897	6.56002
ATPtx	100		ATPtn	100	0		ACt2r	99.976	0.315016		ARTFR211	96.0514	9.33213		ADK3m	98.0897	6.56002
AVITE1t	100		ATPtx	100	0		ACtg	99.976	0.315016		ARTFR212	96.0514	9.33213		ADMDC	98.0897	6.56002
AVITE2t	100		AVITE1t	100	0		ACTLMO	99.976	0.315016		ARTFR213	96.0514	9.33213		ADNCYC	98.0897	6.56002
B_MANNASEly	100		AVITE2t	100	0		ACTNMO	99.976	0.315016		ARTFR31	96.0514	9.33213		ADNK1	98.0897	6.56002
B3GALT3g	100		B_MANNASEly	100	0		ACYP	99.976	0.315016		ARTFR32	96.0514	9.33213		ADNt	98.0897	6.56002
B3GALT41g	100		B3GALT3g	100	0		ADA	99.976	0.315016		ARTFR33	96.0514	9.33213		ADNt4	98.0897	6.56002
B3GALT42g	100		B3GALT41g	100	0		ADAe	99.976	0.315016		ARTFR34	96.0514	9.33213		ADNt5	98.0897	6.56002
B3GALT43g	100		B3GALT42g	100	0		ADCim	99.976	0.315016		ARTFR41	96.0514	9.33213		ADNtl	98.0897	6.56002
B3GALT44g	100		B3GALT43g	100	0		ADEtl	99.976	0.315016		ARTFR42	96.0514	9.33213		ADPGLC	98.0897	6.56002
B3GNT11g	100		B3GALT44g	100	0		ADHAPtx	99.976	0.315016		ARTFR43	96.0514	9.33213		ADPMAN	98.0897	6.56002
B3GNT12g	100		B3GNT11g	100	0		ADK1	99.976	0.315016		ARTFR44	96.0514	9.33213		ADPRDP	98.0897	6.56002
B3GNT51g	100		B3GNT12g	100	0		ADK1m	99.976	0.315016		ARTFR45	96.0514	9.33213		ADPRDPm	98.0897	6.56002
BALAtmr	100		B3GNT51g	100	0		ADK3	99.976	0.315016		ARTFR46	96.0514	9.33213		ADPRIBt	98.0897	6.56002
BALAVECSEC	100		BALAtmr	100	0		ADK3m	99.976	0.315016		ARTFR61	96.0514	9.33213		ADPT	98.0897	6.56002
BAMPPALDOX	100		BALAVECSEC	100	0		ADMDC	99.976	0.315016		ARTPLM1	96.0514	9.33213		ADPtx	98.0897	6.56002
BAMPPALDOXm	100		BAMPPALDOX	100	0		ADNCYC	99.976	0.315016		ARTPLM1m	96.0514	9.33213		ADRNCOAtx	98.0897	6.56002
BBHOX	100		BAMPPALDOXm	100	0		ADNK1	99.976	0.315016		ARTPLM2	96.0514	9.33213		ADRNCPT1	98.0897	6.56002
BDHm	100		BBHOX	100	0		ADNt	99.976	0.315016		ARTPLM2m	96.0514	9.33213		ADRNCPT2	98.0897	6.56002
BDMT_L	100		BDHm	100	0		ADNt4	99.976	0.315016		ARTPLM3	96.0514	9.33213		ADRNCRNt	98.0897	6.56002
BDMT_U	100		BDMT_L	100	0		ADNt5	99.976	0.315016		ARTPLM3m	96.0514	9.33213		ADRNLPVESSEC	98.0897	6.56002
BETALDHx	100		BDMT_U	100	0		ADNtl	99.976	0.315016		ASAH1	96.0514	9.33213		ADRNt	98.0897	6.56002
BETALDHxm	100		BETALDHx	100	0		ADPGLC	99.976	0.315016		ASCBOX	96.0514	9.33213		ADSELK	98.0897	6.56002
BHBt	100		BETALDHxm	100	0		ADPMAN	99.976	0.315016		ASCBt	96.0514	9.33213		ADSK	98.0897	6.56002
BHBtm	100		BHBt	100	0		ADPRDP	99.976	0.315016		ASCBt4	96.0514	9.33213		AFLATOXINte	98.0897	6.56002
BILDGLCURt	100		BHBtm	100	0		ADPRDPm	99.976	0.315016		Asn-X-Ser/Thrtr	96.0514	9.33213		AG13T10g	98.0897	6.56002
BILDGLCURte	100		BILDGLCURt	100	0		ADPRIBt	99.976	0.315016		ASNALANaEx	96.0514	9.33213		AG13T11g	98.0897	6.56002
BILDGLCURtr	100		BILDGLCURte	100	0		ADPT	99.976	0.315016		ASNCYSNaEx	96.0514	9.33213		AG13T12g	98.0897	6.56002
BILGLCURt	100		BILDGLCURtr	100	0		ADPtx	99.976	0.315016		ASNGLNNaEx	96.0514	9.33213		AG13T13g	98.0897	6.56002
BILGLCURte	100		BILGLCURt	100	0		ADRNCOAtx	99.976	0.315016		ASNNm	96.0514	9.33213		AG13T14g	98.0897	6.56002
BILGLCURtr	100		BILGLCURte	100	0		ADRNCPT1	99.976	0.315016		ASNSERNaEx	96.0514	9.33213		AG13T15g	98.0897	6.56002
BILIRED	100		BILGLCURtr	100	0		ADRNCPT2	99.976	0.315016		ASNt4	96.0514	9.33213		AG13T16g	98.0897	6.56002
BILIRUBt2	100		BILIRED	100	0		ADRNCRNt	99.976	0.315016		ASNTHRNaEx	96.0514	9.33213		AG13T17g	98.0897	6.56002
BILIRUBtr	100		BILIRUBt2	100	0		ADRNLPVESSEC	99.976	0.315016		ASNtm	96.0514	9.33213		AG13T18g	98.0897	6.56002
BIOCYTtn	100		BILIRUBtr	100	0		ADRNt	99.976	0.315016		ASNtN1	96.0514	9.33213		AG13T1g	98.0897	6.56002
BMTer_L	100		BIOCYTtn	100	0		ADSELK	99.976	0.315016		ASPDt6	96.0514	9.33213		AG13T2g	98.0897	6.56002
BMTer_U	100		BMTer_L	100	0		ADSK	99.976	0.315016		ASPDxt	96.0514	9.33213		AG13T3g	98.0897	6.56002
BPNT	100		BMTer_U	100	0		AFLATOXINte	99.976	0.315016		ASPGLUm	96.0514	9.33213		AG13T4g	98.0897	6.56002
BPNT2	100		BPNT	100	0		AG13T10g	99.976	0.315016		ASPt6	96.0514	9.33213		AG13T5g	98.0897	6.56002
BTND1	100		BPNT2	100	0		AG13T11g	99.976	0.315016		ASPTA	96.0514	9.33213		AG13T6g	98.0897	6.56002
BTND1n	100		BTND1	100	0		AG13T12g	99.976	0.315016		ASPTAm	96.0514	9.33213		AG13T7g	98.0897	6.56002
BTNDe	100		BTND1n	100	0		AG13T13g	99.976	0.315016		ATP1ter	96.0514	9.33213		AG13T8g	98.0897	6.56002
BTNDm	100		BTNDe	100	0		AG13T14g	99.976	0.315016		ATP2ter	96.0514	9.33213		AG13T9g	98.0897	6.56002
BTNPL	100		BTNDm	100	0		AG13T15g	99.976	0.315016		ATPasel	96.0514	9.33213		AGLPC	98.0897	6.56002
BTNPLm	100		BTNPL	100	0		AG13T16g	99.976	0.315016		ATPH1e	96.0514	9.33213		AGLPED	98.0897	6.56002
BTNt2	100		BTNPLm	100	0		AG13T17g	99.976	0.315016		ATPH2e	96.0514	9.33213		AGLPET	98.0897	6.56002
BTNt2m	100		BTNt2	100	0		AG13T18g	99.976	0.315016		ATPS4m	96.0514	9.33213		AGLPH	98.0897	6.56002
BTNt3i	100		BTNt2m	100	0		AG13T1g	99.976	0.315016		ATPtm	96.0514	9.33213		AGLPR	98.0897	6.56002
BTNt4i	100		BTNt3i	100	0		AG13T2g	99.976	0.315016		ATPtn	96.0514	9.33213		AGLPT	98.0897	6.56002
BTNtn	100		BTNt4i	100	0		AG13T3g	99.976	0.315016		ATPtx	96.0514	9.33213		AGMTm	98.0897	6.56002
BUTt2m	100		BTNtn	100	0		AG13T4g	99.976	0.315016		AVITE1t	96.0514	9.33213		AGPAT1	98.0897	6.56002
BUTt2r	100		BUTt2m	100	0		AG13T5g	99.976	0.315016		AVITE2t	96.0514	9.33213		AGPex	98.0897	6.56002
BVITEt	100		BUTt2r	100	0		AG13T6g	99.976	0.315016		B_MANNASEly	96.0514	9.33213		AGPRim	98.0897	6.56002
BZt	100		BVITEt	100	0		AG13T7g	99.976	0.315016		B3GALT3g	96.0514	9.33213		AGPSx	98.0897	6.56002
BZtr	100		BZt	100	0		AG13T8g	99.976	0.315016		B3GALT41g	96.0514	9.33213		AHANDROSTANGLCte	98.0897	6.56002
C14STRr	100		BZtr	100	0		AG13T9g	99.976	0.315016		B3GALT42g	96.0514	9.33213		AHANDROSTANGLCtr	98.0897	6.56002
C160CPT1	100		C14STRr	100	0		AGLPC	99.976	0.315016		B3GALT43g	96.0514	9.33213		AHCYStn	98.0897	6.56002
C160CPT2	100		C160CPT1	100	0		AGLPED	99.976	0.315016		B3GALT44g	96.0514	9.33213		AHEXASE2ly	98.0897	6.56002
C160CRNt	100		C160CPT2	100	0		AGLPET	99.976	0.315016		B3GNT11g	96.0514	9.33213		AHEXASEly	98.0897	6.56002
C161CPT1	100		C160CRNt	100	0		AGLPH	99.976	0.315016		B3GNT12g	96.0514	9.33213		AK2LGCHOLt	98.0897	6.56002
C161CPT12	100		C161CPT1	100	0		AGLPR	99.976	0.315016		B3GNT51g	96.0514	9.33213		AKGDm	98.0897	6.56002
C161CPT2	100		C161CPT12	100	0		AGLPT	99.976	0.315016		BALAtmr	96.0514	9.33213		AKGMALtm	98.0897	6.56002
C161CPT22	100		C161CPT2	100	0		AGMTm	99.976	0.315016		BALAVECSEC	96.0514	9.33213		AKGt4_3	98.0897	6.56002
C161CRN2t	100		C161CPT22	100	0		AGPAT1	99.976	0.315016		BAMPPALDOX	96.0514	9.33213		AKGtp	98.0897	6.56002
C161CRNt	100		C161CRN2t	100	0		AGPex	99.976	0.315016		BAMPPALDOXm	96.0514	9.33213		AKR1C41	98.0897	6.56002
C180CPT1	100		C161CRNt	100	0		AGPRim	99.976	0.315016		BBHOX	96.0514	9.33213		AKR1C42	98.0897	6.56002
C180CPT2	100		C180CPT1	100	0		AGPSx	99.976	0.315016		BDHm	96.0514	9.33213		ALAASNNaEx	98.0897	6.56002
C180CRNt	100		C180CPT2	100	0		AHANDROSTANGLCte	99.976	0.315016		BDMT_L	96.0514	9.33213		ALACYSNaEx	98.0897	6.56002
C181CPT1	100		C180CRNt	100	0		AHANDROSTANGLCtr	99.976	0.315016		BDMT_U	96.0514	9.33213		ALADGLNexR	98.0897	6.56002
C181CPT2	100		C181CPT1	100	0		AHCYStn	99.976	0.315016		BETALDHx	96.0514	9.33213		ALADGLYexR	98.0897	6.56002
C181CRNt	100		C181CPT2	100	0		AHEXASE2ly	99.976	0.315016		BETALDHxm	96.0514	9.33213		ALAGLNexR	98.0897	6.56002
C204CPT1	100		C181CRNt	100	0		AHEXASEly	99.976	0.315016		BHBt	96.0514	9.33213		ALAGLNNaEx	98.0897	6.56002
C204CPT2	100		C204CPT1	100	0		AK2LGCHOLt	99.976	0.315016		BHBtm	96.0514	9.33213		ALAGLYexR	98.0897	6.56002
C204CRNt	100		C204CPT2	100	0		AKGDm	99.976	0.315016		BILDGLCURt	96.0514	9.33213		ALAR	98.0897	6.56002
C226COAtx	100		C204CRNt	100	0		AKGMALtm	99.976	0.315016		BILDGLCURte	96.0514	9.33213		ALASERNaEx	98.0897	6.56002
C226CPT1	100		C226COAtx	100	0		AKGt4_3	99.976	0.315016		BILDGLCURtr	96.0514	9.33213		ALASm	98.0897	6.56002
C226CPT2	100		C226CPT1	100	0		AKGtp	99.976	0.315016		BILGLCURt	96.0514	9.33213		ALAt2r	98.0897	6.56002
C226CRNt	100		C226CPT2	100	0		AKR1C41	99.976	0.315016		BILGLCURte	96.0514	9.33213		ALAt2rL	98.0897	6.56002
C2M26DCOAHLm	100		C226CRNt	100	0		AKR1C42	99.976	0.315016		BILGLCURtr	96.0514	9.33213		ALAt4	98.0897	6.56002
C2M26DCOAHLx	100		C2M26DCOAHLm	100	0		ALAASNNaEx	99.976	0.315016		BILIRED	96.0514	9.33213		ALATA_L	98.0897	6.56002
C3STDH1Pr	100		C2M26DCOAHLx	100	0		ALACYSNaEx	99.976	0.315016		BILIRUBt2	96.0514	9.33213		ALATHRNaEx	98.0897	6.56002
C3STDH1r	100		C3STDH1Pr	100	0		ALADGLNexR	99.976	0.315016		BILIRUBtr	96.0514	9.33213		ALAtN1	98.0897	6.56002
C3STKR2r	100		C3STDH1r	100	0		ALADGLYexR	99.976	0.315016		BIOCYTtn	96.0514	9.33213		ALCD1	98.0897	6.56002
C4STMO1r	100		C3STKR2r	100	0		ALAGLNexR	99.976	0.315016		BMTer_L	96.0514	9.33213		ALCD21_D	98.0897	6.56002
C4STMO2Pr	100		C4STMO1r	100	0		ALAGLNNaEx	99.976	0.315016		BMTer_U	96.0514	9.33213		ALCD21_L	98.0897	6.56002
C4STMO2r	100		C4STMO2Pr	100	0		ALAGLYexR	99.976	0.315016		BPNT	96.0514	9.33213		ALCD22_D	98.0897	6.56002
CAATPS	100		C4STMO2r	100	0		ALAR	99.976	0.315016		BPNT2	96.0514	9.33213		ALCD22_L	98.0897	6.56002
CAMPt	100		CAATPS	100	0		ALASERNaEx	99.976	0.315016		BTND1	96.0514	9.33213		ALCD2yf	98.0897	6.56002
CAT2p	100		CAMPt	100	0		ALASm	99.976	0.315016		BTND1n	96.0514	9.33213		ALDD20x	98.0897	6.56002
CAt7r	100		CAT2p	100	0		ALAt2r	99.976	0.315016		BTNDe	96.0514	9.33213		ALDD20xm	98.0897	6.56002
CATm	100		CAt7r	100	0		ALAt2rL	99.976	0.315016		BTNDm	96.0514	9.33213		ALDD21	98.0897	6.56002
CATp	100		CATm	100	0		ALAt4	99.976	0.315016		BTNPL	96.0514	9.33213		ALDD2x	98.0897	6.56002
CBL2OR	100		CATp	100	0		ALATA_L	99.976	0.315016		BTNPLm	96.0514	9.33213		ALDD2xm	98.0897	6.56002
CBL2tm	100		CBL2OR	100	0		ALATHRNaEx	99.976	0.315016		BTNt2	96.0514	9.33213		ALDD2y	98.0897	6.56002
CBLATm	100		CBL2tm	100	0		ALAtN1	99.976	0.315016		BTNt2m	96.0514	9.33213		ALDSTRNte	98.0897	6.56002
CBPPer	100		CBLATm	100	0		ALCD1	99.976	0.315016		BTNt3i	96.0514	9.33213		ALKP	98.0897	6.56002
CBPSam	100		CBPPer	100	0		ALCD21_D	99.976	0.315016		BTNt4i	96.0514	9.33213		ALOX12	98.0897	6.56002
CBPter	100		CBPSam	100	0		ALCD21_L	99.976	0.315016		BTNtn	96.0514	9.33213		ALOX12R	98.0897	6.56002
CBR1	100		CBPter	100	0		ALCD22_D	99.976	0.315016		BUTt2m	96.0514	9.33213		ALOX15	98.0897	6.56002
CBR2	100		CBR1	100	0		ALCD22_L	99.976	0.315016		BUTt2r	96.0514	9.33213		ALOX5	98.0897	6.56002
CCA_D3t	100		CBR2	100	0		ALCD2yf	99.976	0.315016		BVITEt	96.0514	9.33213		ALOX52	98.0897	6.56002
CDIPTr	100		CCA_D3t	100	0		ALDD20x	99.976	0.315016		BZt	96.0514	9.33213		ALR	98.0897	6.56002
CDPDAGtm	100		CDIPTr	100	0		ALDD20xm	99.976	0.315016		BZtr	96.0514	9.33213		ALR2	98.0897	6.56002
CDS	100		CDPDAGtm	100	0		ALDD21	99.976	0.315016		C14STRr	96.0514	9.33213		ALR3	98.0897	6.56002
CDSm	100		CDS	100	0		ALDD2x	99.976	0.315016		C160CPT1	96.0514	9.33213		AM6SAD	98.0897	6.56002
CEPTC	100		CDSm	100	0		ALDD2xm	99.976	0.315016		C160CPT2	96.0514	9.33213		AMACR2p	98.0897	6.56002
CEPTE	100		CEPTC	100	0		ALDD2y	99.976	0.315016		C160CRNt	96.0514	9.33213		AMACR2r	98.0897	6.56002
CERK	100		CEPTE	100	0		ALDSTRNte	99.976	0.315016		C161CPT1	96.0514	9.33213		AMACRp	98.0897	6.56002
CERT1gt	100		CERK	100	0		ALKP	99.976	0.315016		C161CPT12	96.0514	9.33213		AMACRr	98.0897	6.56002
CERT1rt	100		CERT1gt	100	0		ALOX12	99.976	0.315016		C161CPT2	96.0514	9.33213		AMANK	98.0897	6.56002
CERT2gt	100		CERT1rt	100	0		ALOX12R	99.976	0.315016		C161CPT22	96.0514	9.33213		AMCOXO	98.0897	6.56002
CERT2rt	100		CERT2gt	100	0		ALOX15	99.976	0.315016		C161CRN2t	96.0514	9.33213		AMETt2m	98.0897	6.56002
CGLYt3(2)	100		CERT2rt	100	0		ALOX5	99.976	0.315016		C161CRNt	96.0514	9.33213		AMETtn	98.0897	6.56002
CGMPt	100		CGLYt3(2)	100	0		ALOX52	99.976	0.315016		C180CPT1	96.0514	9.33213		AMPTASECG	98.0897	6.56002
CHLP	100		CGMPt	100	0		ALR	99.976	0.315016		C180CPT2	96.0514	9.33213		AMPTASECGe	98.0897	6.56002
CHLPCTD	100		CHLP	100	0		ALR2	99.976	0.315016		C180CRNt	96.0514	9.33213		AMPtp	98.0897	6.56002
CHLtm	100		CHLPCTD	100	0		ALR3	99.976	0.315016		C181CPT1	96.0514	9.33213		AMPtr	98.0897	6.56002
CHOLATEt	100		CHLtm	100	0		AM6SAD	99.976	0.315016		C181CPT2	96.0514	9.33213		AMY1e	98.0897	6.56002
CHOLATEt2	100		CHOLATEt	100	0		AMACR2p	99.976	0.315016		C181CRNt	96.0514	9.33213		AMY2e	98.0897	6.56002
CHOLD2m	100		CHOLATEt2	100	0		AMACR2r	99.976	0.315016		C204CPT1	96.0514	9.33213		ANDRSTRNGLCte	98.0897	6.56002
CHOLK	100		CHOLD2m	100	0		AMACRp	99.976	0.315016		C204CPT2	96.0514	9.33213		ANDRSTRNGLCtr	98.0897	6.56002
CHOLPtg	100		CHOLK	100	0		AMACRr	99.976	0.315016		C204CRNt	96.0514	9.33213		ANDRSTRNte	98.0897	6.56002
CHOLPtl	100		CHOLPtg	100	0		AMANK	99.976	0.315016		C226COAtx	96.0514	9.33213		ANDRSTRNtr	98.0897	6.56002
CHOLt4	100		CHOLPtl	100	0		AMCOXO	99.976	0.315016		C226CPT1	96.0514	9.33213		AP4AH1	98.0897	6.56002
CHOLtg	100		CHOLt4	100	0		AMETtn	99.976	0.315016		C226CPT2	96.0514	9.33213		APAT2rm	98.0897	6.56002
CHOLtn	100		CHOLtg	100	0		AMPDA	99.976	0.315016		C226CRNt	96.0514	9.33213		APRTO2	98.0897	6.56002
CHOLtr	100		CHOLtn	100	0		AMPTASECG	99.976	0.315016		C2M26DCOAHLm	96.0514	9.33213		AQCOBALt	98.0897	6.56002
CHOLtu	100		CHOLtr	100	0		AMPTASECGe	99.976	0.315016		C2M26DCOAHLx	96.0514	9.33213		ARAB-Lt	98.0897	6.56002
CHSTEROLSULT	100		CHOLtu	100	0		AMPtp	99.976	0.315016		C3STDH1Pr	96.0514	9.33213		ARABR	98.0897	6.56002
CHSTEROLt	100		CHSTEROLSULT	100	0		AMPtr	99.976	0.315016		C3STDH1r	96.0514	9.33213		ARACHCOAtx	98.0897	6.56002
CHSTEROLt1	100		CHSTEROLt	100	0		AMY1e	99.976	0.315016		C3STKR2r	96.0514	9.33213		ARACHCPT1	98.0897	6.56002
CHSTEROLt2	100		CHSTEROLt1	100	0		AMY2e	99.976	0.315016		C4STMO1r	96.0514	9.33213		ARACHCPT2	98.0897	6.56002
CHSTEROLt3	100		CHSTEROLt2	100	0		ANDRSTRNGLCte	99.976	0.315016		C4STMO2Pr	96.0514	9.33213		ARACHCRNt	98.0897	6.56002
CHSTEROLtg	100		CHSTEROLt3	100	0		ANDRSTRNGLCtr	99.976	0.315016		C4STMO2r	96.0514	9.33213		ARACHDCOAtx	98.0897	6.56002
CHTNASE	100		CHSTEROLtg	100	0		ANDRSTRNte	99.976	0.315016		CAATPS	96.0514	9.33213		ARACHDt2	98.0897	6.56002
CHTNASEe	100		CHTNASE	100	0		ANDRSTRNtr	99.976	0.315016		CAMPt	96.0514	9.33213		ARACHDtr	98.0897	6.56002
CITL	100		CHTNASEe	100	0		AP4AH1	99.976	0.315016		CAT2p	96.0514	9.33213		ARACHt	98.0897	6.56002
CITRtm	100		CITL	100	0		APAT2rm	99.976	0.315016		CAt7r	96.0514	9.33213		ARGDCm	98.0897	6.56002
CITt4_2	100		CITRtm	100	0		APRTO2	99.976	0.315016		CATm	96.0514	9.33213		ARGLYSex	98.0897	6.56002
CITt4_4	100		CITt4_2	100	0		AQCOBALt	99.976	0.315016		CATp	96.0514	9.33213		ARGt4	98.0897	6.56002
CITtam	100		CITt4_4	100	0		ARAB-Lt	99.976	0.315016		CBL2OR	96.0514	9.33213		ARGtiDF	98.0897	6.56002
CITtbm	100		CITtam	100	0		ARABR	99.976	0.315016		CBL2tm	96.0514	9.33213		ARSA	98.0897	6.56002
CK	100		CITtbm	100	0		ARACHCOAtx	99.976	0.315016		CBLATm	96.0514	9.33213		ARTCOAL1	98.0897	6.56002
CKc	100		CK	100	0		ARACHCPT1	99.976	0.315016		CBPPer	96.0514	9.33213		ARTCOAL2	98.0897	6.56002
CLFORtex	100		CKc	100	0		ARACHCPT2	99.976	0.315016		CBPSam	96.0514	9.33213		ARTCOAL3	98.0897	6.56002
CLFORtex2	100		CLFORtex	100	0		ARACHCRNt	99.976	0.315016		CBPter	96.0514	9.33213		ARTFR11	98.0897	6.56002
CLHCO3tex2	100		CLFORtex2	100	0		ARACHDCOAtx	99.976	0.315016		CBR1	96.0514	9.33213		ARTFR12	98.0897	6.56002
CLHCOtex	100		CLHCO3tex2	100	0		ARACHDt2	99.976	0.315016		CBR2	96.0514	9.33213		ARTFR13	98.0897	6.56002
CLI2tex	100		CLHCOtex	100	0		ARACHDtr	99.976	0.315016		CCA_D3t	96.0514	9.33213		ARTFR202	98.0897	6.56002
CLOHtex2	100		CLI2tex	100	0		ARACHt	99.976	0.315016		CDIPTr	96.0514	9.33213		ARTFR203	98.0897	6.56002
CLOXAtex2	100		CLOHtex2	100	0		ARGDCm	99.976	0.315016		CDPDAGtm	96.0514	9.33213		ARTFR204	98.0897	6.56002
CLPNDCOAtx	100		CLOXAtex2	100	0		ARGLYSex	99.976	0.315016		CDS	96.0514	9.33213		ARTFR205	98.0897	6.56002
CLPNDCPT1	100		CLPNDCOAtx	100	0		ARGt4	99.976	0.315016		CDSm	96.0514	9.33213		ARTFR206	98.0897	6.56002
CLPNDCPT2	100		CLPNDCPT1	100	0		ARGtiDF	99.976	0.315016		CEPTC	96.0514	9.33213		ARTFR207	98.0897	6.56002
CLPNDCRNt	100		CLPNDCPT2	100	0		ARSA	99.976	0.315016		CEPTE	96.0514	9.33213		ARTFR208	98.0897	6.56002
CLPNDt	100		CLPNDCRNt	100	0		ARTCOAL1	99.976	0.315016		CERK	96.0514	9.33213		ARTFR209	98.0897	6.56002
CLS_hs	100		CLPNDt	100	0		ARTCOAL2	99.976	0.315016		CERT1gt	96.0514	9.33213		ARTFR210	98.0897	6.56002
CMPACNAtg	100		CLS_hs	100	0		ARTCOAL3	99.976	0.315016		CERT1rt	96.0514	9.33213		ARTFR211	98.0897	6.56002
CMPACNAtn	100		CMPACNAtg	100	0		ARTFR11	99.976	0.315016		CERT2gt	96.0514	9.33213		ARTFR212	98.0897	6.56002
CMPSAS	100		CMPACNAtn	100	0		ARTFR12	99.976	0.315016		CERT2rt	96.0514	9.33213		ARTFR213	98.0897	6.56002
CMPSASn	100		CMPSAS	100	0		ARTFR13	99.976	0.315016		CGLYt3(2)	96.0514	9.33213		ARTFR31	98.0897	6.56002
CO2t	100		CMPSASn	100	0		ARTFR202	99.976	0.315016		CGMPt	96.0514	9.33213		ARTFR32	98.0897	6.56002
CO2ter	100		CO2t	100	0		ARTFR203	99.976	0.315016		CHLP	96.0514	9.33213		ARTFR33	98.0897	6.56002
CO2tg	100		CO2ter	100	0		ARTFR204	99.976	0.315016		CHLPCTD	96.0514	9.33213		ARTFR34	98.0897	6.56002
CO2tm	100		CO2tg	100	0		ARTFR205	99.976	0.315016		CHLtm	96.0514	9.33213		ARTFR41	98.0897	6.56002
CO2tn	100		CO2tm	100	0		ARTFR206	99.976	0.315016		CHOLATEt	96.0514	9.33213		ARTFR42	98.0897	6.56002
CO2tp	100		CO2tn	100	0		ARTFR207	99.976	0.315016		CHOLATEt2	96.0514	9.33213		ARTFR43	98.0897	6.56002
COAtg	100		CO2tp	100	0		ARTFR208	99.976	0.315016		CHOLD2m	96.0514	9.33213		ARTFR44	98.0897	6.56002
COAtl	100		COAtg	100	0		ARTFR209	99.976	0.315016		CHOLK	96.0514	9.33213		ARTFR45	98.0897	6.56002
COAtm	100		COAtl	100	0		ARTFR210	99.976	0.315016		CHOLPtg	96.0514	9.33213		ARTFR61	98.0897	6.56002
COAtn	100		COAtm	100	0		ARTFR211	99.976	0.315016		CHOLPtl	96.0514	9.33213		ARTPLM1	98.0897	6.56002
COAtp	100		COAtn	100	0		ARTFR212	99.976	0.315016		CHOLt4	96.0514	9.33213		ARTPLM1m	98.0897	6.56002
COAtr	100		COAtp	100	0		ARTFR213	99.976	0.315016		CHOLtg	96.0514	9.33213		ARTPLM2	98.0897	6.56002
COKECBESr	100		COAtr	100	0		ARTFR31	99.976	0.315016		CHOLtn	96.0514	9.33213		ARTPLM2m	98.0897	6.56002
COQ3m	100		COKECBESr	100	0		ARTFR32	99.976	0.315016		CHOLtr	96.0514	9.33213		ARTPLM3	98.0897	6.56002
COQ5m	100		COQ3m	100	0		ARTFR33	99.976	0.315016		CHOLtu	96.0514	9.33213		ARTPLM3m	98.0897	6.56002
COQ6m	100		COQ5m	100	0		ARTFR34	99.976	0.315016		CHSTEROLSULT	96.0514	9.33213		ASCBOX	98.0897	6.56002
COQ7m	100		COQ6m	100	0		ARTFR41	99.976	0.315016		CHSTEROLt	96.0514	9.33213		ASCBt	98.0897	6.56002
CORE2GTg	100		COQ7m	100	0		ARTFR42	99.976	0.315016		CHSTEROLt1	96.0514	9.33213		ASCBt4	98.0897	6.56002
CORE6GTg	100		CORE2GTg	100	0		ARTFR43	99.976	0.315016		CHSTEROLt2	96.0514	9.33213		Asn-X-Ser/Thrtr	98.0897	6.56002
COt	100		CORE6GTg	100	0		ARTFR44	99.976	0.315016		CHSTEROLt3	96.0514	9.33213		ASNALANaEx	98.0897	6.56002
COUCOAFm	100		COt	100	0		ARTFR45	99.976	0.315016		CHSTEROLtg	96.0514	9.33213		ASNCYSNaEx	98.0897	6.56002
COUMARINte	100		COUCOAFm	100	0		ARTFR46	99.976	0.315016		CHTNASE	96.0514	9.33213		ASNGLNNaEx	98.0897	6.56002
CPCTDTX	100		COUMARINte	100	0		ARTFR61	99.976	0.315016		CHTNASEe	96.0514	9.33213		ASNNm	98.0897	6.56002
CPPPGO	100		CPCTDTX	100	0		ARTPLM1	99.976	0.315016		CITL	96.0514	9.33213		ASNSERNaEx	98.0897	6.56002
CREATt4(2)r	100		CPPPGO	100	0		ARTPLM1m	99.976	0.315016		CITRtm	96.0514	9.33213		ASNt4	98.0897	6.56002
CREATtmdiffir	100		CREATt4(2)r	100	0		ARTPLM2	99.976	0.315016		CITt4_2	96.0514	9.33213		ASNTHRNaEx	98.0897	6.56002
CRMPte	100		CREATtmdiffir	100	0		ARTPLM2m	99.976	0.315016		CITt4_4	96.0514	9.33213		ASNtm	98.0897	6.56002
CRNCAR3tp	100		CRMPte	100	0		ARTPLM3	99.976	0.315016		CITtam	96.0514	9.33213		ASNtN1	98.0897	6.56002
CRNCARtp	100		CRNCAR3tp	100	0		ARTPLM3m	99.976	0.315016		CITtbm	96.0514	9.33213		ASPDt6	98.0897	6.56002
CRNt	100		CRNCARtp	100	0		ASCBOX	99.976	0.315016		CK	96.0514	9.33213		ASPDxt	98.0897	6.56002
CRNtHa	100		CRNt	100	0		ASCBt	99.976	0.315016		CKc	96.0514	9.33213		ASPGLUm	98.0897	6.56002
CRNtim	100		CRNtHa	100	0		ASCBt4	99.976	0.315016		CLFORtex	96.0514	9.33213		ASPt6	98.0897	6.56002
CRNtuIR	100		CRNtim	100	0		Asn-X-Ser/Thrtr	99.976	0.315016		CLFORtex2	96.0514	9.33213		ASPTA	98.0897	6.56002
CRNtuNa	100		CRNtuIR	100	0		ASNALANaEx	99.976	0.315016		CLHCO3tex2	96.0514	9.33213		ASPTAm	98.0897	6.56002
CRNtx	100		CRNtuNa	100	0		ASNCYSNaEx	99.976	0.315016		CLHCOtex	96.0514	9.33213		ATP1ter	98.0897	6.56002
CRTSLt	100		CRNtx	100	0		ASNGLNNaEx	99.976	0.315016		CLI2tex	96.0514	9.33213		ATP2ter	98.0897	6.56002
CRTSLtm	100		CRTSLt	100	0		ASNNm	99.976	0.315016		CLOHtex2	96.0514	9.33213		ATPasel	98.0897	6.56002
CRTSLtr	100		CRTSLtm	100	0		ASNSERNaEx	99.976	0.315016		CLOXAtex2	96.0514	9.33213		ATPH1e	98.0897	6.56002
CRTSTRNt	100		CRTSLtr	100	0		ASNt4	99.976	0.315016		CLPNDCOAtx	96.0514	9.33213		ATPH2e	98.0897	6.56002
CRTSTRNtm	100		CRTSTRNt	100	0		ASNTHRNaEx	99.976	0.315016		CLPNDCPT1	96.0514	9.33213		ATPS4m	98.0897	6.56002
CRTSTRNtr	100		CRTSTRNtm	100	0		ASNtm	99.976	0.315016		CLPNDCPT2	96.0514	9.33213		ATPtm	98.0897	6.56002
CRVNCtr	100		CRTSTRNtr	100	0		ASNtN1	99.976	0.315016		CLPNDCRNt	96.0514	9.33213		ATPtn	98.0897	6.56002
CSm	100		CRVNCtr	100	0		ASPDt6	99.976	0.315016		CLPNDt	96.0514	9.33213		ATPtx	98.0897	6.56002
CSNAT	100		CSm	100	0		ASPDxt	99.976	0.315016		CLS_hs	96.0514	9.33213		AVITE1t	98.0897	6.56002
CSNAT2m	100		CSNAT	100	0		ASPGLUm	99.976	0.315016		CMPACNAtg	96.0514	9.33213		AVITE2t	98.0897	6.56002
CSNAT2x	100		CSNAT2m	100	0		ASPt6	99.976	0.315016		CMPACNAtn	96.0514	9.33213		B_MANNASEly	98.0897	6.56002
CSNAT3x	100		CSNAT2x	100	0		ASPTA	99.976	0.315016		CMPSAS	96.0514	9.33213		B3GALT3g	98.0897	6.56002
CSNATer	100		CSNAT3x	100	0		ASPTAm	99.976	0.315016		CMPSASn	96.0514	9.33213		B3GALT41g	98.0897	6.56002
CSNATm	100		CSNATer	100	0		ATP1ter	99.976	0.315016		CO2t	96.0514	9.33213		B3GALT42g	98.0897	6.56002
CSNATp	100		CSNATm	100	0		ATP2ter	99.976	0.315016		CO2ter	96.0514	9.33213		B3GALT43g	98.0897	6.56002
CSNATr	100		CSNATp	100	0		ATPasel	99.976	0.315016		CO2tg	96.0514	9.33213		B3GALT44g	98.0897	6.56002
CSNt	100		CSNATr	100	0		ATPH1e	99.976	0.315016		CO2tm	96.0514	9.33213		B3GNT11g	98.0897	6.56002
CSPG_At	100		CSNt	100	0		ATPH2e	99.976	0.315016		CO2tn	96.0514	9.33213		B3GNT12g	98.0897	6.56002
CSPG_Atly	100		CSPG_At	100	0		ATPS4m	99.976	0.315016		CO2tp	96.0514	9.33213		B3GNT51g	98.0897	6.56002
CSPG_Bt	100		CSPG_Atly	100	0		ATPtm	99.976	0.315016		COAtg	96.0514	9.33213		BALAtmr	98.0897	6.56002
CSPG_Btly	100		CSPG_Bt	100	0		ATPtn	99.976	0.315016		COAtl	96.0514	9.33213		BALAVECSEC	98.0897	6.56002
CSPG_Ct	100		CSPG_Btly	100	0		ATPtx	99.976	0.315016		COAtm	96.0514	9.33213		BAMPPALDOX	98.0897	6.56002
CSPG_Ctly	100		CSPG_Ct	100	0		AVITE1t	99.976	0.315016		COAtn	96.0514	9.33213		BAMPPALDOXm	98.0897	6.56002
CSPG_Dt	100		CSPG_Ctly	100	0		AVITE2t	99.976	0.315016		COAtp	96.0514	9.33213		BBHOX	98.0897	6.56002
CSPG_Dtly	100		CSPG_Dt	100	0		B_MANNASEly	99.976	0.315016		COAtr	96.0514	9.33213		BDHm	98.0897	6.56002
CSPG_Et	100		CSPG_Dtly	100	0		B3GALT3g	99.976	0.315016		COKECBESr	96.0514	9.33213		BDMT_L	98.0897	6.56002
CSPG_Etly	100		CSPG_Et	100	0		B3GALT41g	99.976	0.315016		COQ3m	96.0514	9.33213		BDMT_U	98.0897	6.56002
CTPtn	100		CSPG_Etly	100	0		B3GALT42g	99.976	0.315016		COQ5m	96.0514	9.33213		BETALDHx	98.0897	6.56002
CYANSTm	100		CTPtn	100	0		B3GALT43g	99.976	0.315016		COQ6m	96.0514	9.33213		BETALDHxm	98.0897	6.56002
CYANt	100		CYANSTm	100	0		B3GALT44g	99.976	0.315016		COQ7m	96.0514	9.33213		BHBt	98.0897	6.56002
CYANtm	100		CYANt	100	0		B3GNT11g	99.976	0.315016		CORE2GTg	96.0514	9.33213		BHBtm	98.0897	6.56002
CYOOm2	100		CYANtm	100	0		B3GNT12g	99.976	0.315016		CORE6GTg	96.0514	9.33213		BILDGLCURt	98.0897	6.56002
CYOOm3	100		CYOOm2	100	0		B3GNT51g	99.976	0.315016		COt	96.0514	9.33213		BILDGLCURte	98.0897	6.56002
CYOR-u10m	100		CYOOm3	100	0		BALAtmr	99.976	0.315016		COUCOAFm	96.0514	9.33213		BILDGLCURtr	98.0897	6.56002
CYSALANaEx	100		CYOR-u10m	100	0		BALAVECSEC	99.976	0.315016		COUMARINte	96.0514	9.33213		BILGLCURt	98.0897	6.56002
CYSASNNaEx	100		CYSALANaEx	100	0		BAMPPALDOX	99.976	0.315016		CPCTDTX	96.0514	9.33213		BILGLCURte	98.0897	6.56002
CYSGLNNaEx	100		CYSASNNaEx	100	0		BAMPPALDOXm	99.976	0.315016		CPPPGO	96.0514	9.33213		BILGLCURtr	98.0897	6.56002
CYSGLUexR	100		CYSGLNNaEx	100	0		BBHOX	99.976	0.315016		CREATt4(2)r	96.0514	9.33213		BILIRED	98.0897	6.56002
CYSGLYex	100		CYSGLUexR	100	0		BDHm	99.976	0.315016		CREATtmdiffir	96.0514	9.33213		BILIRUBt2	98.0897	6.56002
CYSGLYexR	100		CYSGLYex	100	0		BDMT_L	99.976	0.315016		CRMPte	96.0514	9.33213		BILIRUBtr	98.0897	6.56002
CYSSERNaEx	100		CYSGLYexR	100	0		BDMT_U	99.976	0.315016		CRNCAR3tp	96.0514	9.33213		BIOCYTtn	98.0897	6.56002
CYSt4	100		CYSSERNaEx	100	0		BETALDHx	99.976	0.315016		CRNCARtp	96.0514	9.33213		BMTer_L	98.0897	6.56002
CYSTAm	100		CYSt4	100	0		BHBt	99.976	0.315016		CRNt	96.0514	9.33213		BMTer_U	98.0897	6.56002
CYStec	100		CYSTAm	100	0		BHBtm	99.976	0.315016		CRNtHa	96.0514	9.33213		BPNT	98.0897	6.56002
CYSTGLUex	100		CYStec	100	0		BILDGLCURt	99.976	0.315016		CRNtim	96.0514	9.33213		BPNT2	98.0897	6.56002
CYSTHRNaEx	100		CYSTGLUex	100	0		BILDGLCURte	99.976	0.315016		CRNtuIR	96.0514	9.33213		BTND1	98.0897	6.56002
CYSTSERex	100		CYSTHRNaEx	100	0		BILDGLCURtr	99.976	0.315016		CRNtuNa	96.0514	9.33213		BTND1n	98.0897	6.56002
CYTD	100		CYSTSERex	100	0		BILGLCURt	99.976	0.315016		CRNtx	96.0514	9.33213		BTNDe	98.0897	6.56002
CYTDK1	100		CYTD	100	0		BILGLCURte	99.976	0.315016		CRTSLt	96.0514	9.33213		BTNDm	98.0897	6.56002
CYTDK2m	100		CYTDK1	100	0		BILGLCURtr	99.976	0.315016		CRTSLtm	96.0514	9.33213		BTNPL	98.0897	6.56002
CYTDn	100		CYTDK2m	100	0		BILIRED	99.976	0.315016		CRTSLtr	96.0514	9.33213		BTNPLm	98.0897	6.56002
CYTDt	100		CYTDn	100	0		BILIRUBt2	99.976	0.315016		CRTSTRNt	96.0514	9.33213		BTNt2	98.0897	6.56002
CYTDt4	100		CYTDt	100	0		BILIRUBtr	99.976	0.315016		CRTSTRNtm	96.0514	9.33213		BTNt2m	98.0897	6.56002
CYTDt5	100		CYTDt4	100	0		BIOCYTtn	99.976	0.315016		CRTSTRNtr	96.0514	9.33213		BTNt3i	98.0897	6.56002
CYTDtl	100		CYTDt5	100	0		BMTer_L	99.976	0.315016		CRVNCtr	96.0514	9.33213		BTNt4i	98.0897	6.56002
CYTDtm	100		CYTDtl	100	0		BMTer_U	99.976	0.315016		CSm	96.0514	9.33213		BTNtn	98.0897	6.56002
CYTDtn	100		CYTDtm	100	0		BPNT	99.976	0.315016		CSNAT	96.0514	9.33213		BUTt2m	98.0897	6.56002
CYTK1	100		CYTDtn	100	0		BPNT2	99.976	0.315016		CSNAT2m	96.0514	9.33213		BUTt2r	98.0897	6.56002
CYTK10	100		CYTK1	100	0		BTND1	99.976	0.315016		CSNAT2x	96.0514	9.33213		BVITEt	98.0897	6.56002
CYTK10n	100		CYTK10	100	0		BTND1n	99.976	0.315016		CSNAT3x	96.0514	9.33213		BZt	98.0897	6.56002
CYTK11	100		CYTK10n	100	0		BTNDe	99.976	0.315016		CSNATer	96.0514	9.33213		BZtr	98.0897	6.56002
CYTK11n	100		CYTK11	100	0		BTNDm	99.976	0.315016		CSNATm	96.0514	9.33213		C14STRr	98.0897	6.56002
CYTK12	100		CYTK11n	100	0		BTNPL	99.976	0.315016		CSNATp	96.0514	9.33213		C160CPT1	98.0897	6.56002
CYTK12n	100		CYTK12	100	0		BTNPLm	99.976	0.315016		CSNATr	96.0514	9.33213		C160CPT2	98.0897	6.56002
CYTK13	100		CYTK12n	100	0		BTNt2	99.976	0.315016		CSNt	96.0514	9.33213		C160CRNt	98.0897	6.56002
CYTK13n	100		CYTK13	100	0		BTNt2m	99.976	0.315016		CSPG_At	96.0514	9.33213		C161CPT1	98.0897	6.56002
CYTK14	100		CYTK13n	100	0		BTNt3i	99.976	0.315016		CSPG_Atly	96.0514	9.33213		C161CPT12	98.0897	6.56002
CYTK14n	100		CYTK14	100	0		BTNt4i	99.976	0.315016		CSPG_Bt	96.0514	9.33213		C161CPT2	98.0897	6.56002
CYTK1m	100		CYTK14n	100	0		BTNtn	99.976	0.315016		CSPG_Btly	96.0514	9.33213		C161CPT22	98.0897	6.56002
CYTK1n	100		CYTK1m	100	0		BUTt2m	99.976	0.315016		CSPG_Ct	96.0514	9.33213		C161CRN2t	98.0897	6.56002
CYTK2	100		CYTK1n	100	0		BUTt2r	99.976	0.315016		CSPG_Ctly	96.0514	9.33213		C161CRNt	98.0897	6.56002
CYTK2n	100		CYTK2	100	0		BVITEt	99.976	0.315016		CSPG_Dt	96.0514	9.33213		C180CPT1	98.0897	6.56002
CYTK3	100		CYTK2n	100	0		BZt	99.976	0.315016		CSPG_Dtly	96.0514	9.33213		C180CPT2	98.0897	6.56002
CYTK3n	100		CYTK3	100	0		BZtr	99.976	0.315016		CSPG_Et	96.0514	9.33213		C180CRNt	98.0897	6.56002
CYTK4	100		CYTK3n	100	0		C14STRr	99.976	0.315016		CSPG_Etly	96.0514	9.33213		C181CPT1	98.0897	6.56002
CYTK4n	100		CYTK4	100	0		C160CPT1	99.976	0.315016		CTPtn	96.0514	9.33213		C181CPT2	98.0897	6.56002
CYTK5	100		CYTK4n	100	0		C160CPT2	99.976	0.315016		CYANSTm	96.0514	9.33213		C181CRNt	98.0897	6.56002
CYTK5n	100		CYTK5	100	0		C160CRNt	99.976	0.315016		CYANt	96.0514	9.33213		C204CPT1	98.0897	6.56002
CYTK6	100		CYTK5n	100	0		C161CPT1	99.976	0.315016		CYANtm	96.0514	9.33213		C204CPT2	98.0897	6.56002
CYTK6n	100		CYTK6	100	0		C161CPT12	99.976	0.315016		CYOOm2	96.0514	9.33213		C204CRNt	98.0897	6.56002
CYTK7	100		CYTK6n	100	0		C161CPT2	99.976	0.315016		CYOOm3	96.0514	9.33213		C226COAtx	98.0897	6.56002
CYTK7n	100		CYTK7	100	0		C161CPT22	99.976	0.315016		CYOR-u10m	96.0514	9.33213		C226CPT1	98.0897	6.56002
CYTK8	100		CYTK7n	100	0		C161CRN2t	99.976	0.315016		CYSALANaEx	96.0514	9.33213		C226CPT2	98.0897	6.56002
CYTK8n	100		CYTK8	100	0		C161CRNt	99.976	0.315016		CYSASNNaEx	96.0514	9.33213		C226CRNt	98.0897	6.56002
CYTK9	100		CYTK8n	100	0		C180CPT1	99.976	0.315016		CYSGLNNaEx	96.0514	9.33213		C2M26DCOAHLm	98.0897	6.56002
CYTK9n	100		CYTK9	100	0		C180CPT2	99.976	0.315016		CYSGLUexR	96.0514	9.33213		C2M26DCOAHLx	98.0897	6.56002
CytOxe-	100		CYTK9n	100	0		C180CRNt	99.976	0.315016		CYSGLYex	96.0514	9.33213		C3STDH1Pr	98.0897	6.56002
D-LACt2	100		CytOxe-	100	0		C181CPT1	99.976	0.315016		CYSGLYexR	96.0514	9.33213		C3STDH1r	98.0897	6.56002
D-LACtm	100		D-LACt2	100	0		C181CPT2	99.976	0.315016		CYSSERNaEx	96.0514	9.33213		C3STKR2r	98.0897	6.56002
DADA	100		D-LACtm	100	0		C181CRNt	99.976	0.315016		CYSt4	96.0514	9.33213		C4STMO1r	98.0897	6.56002
DADAe	100		DADA	100	0		C204CPT1	99.976	0.315016		CYSTAm	96.0514	9.33213		C4STMO2Pr	98.0897	6.56002
DADNK	100		DADAe	100	0		C204CPT2	99.976	0.315016		CYStec	96.0514	9.33213		C4STMO2r	98.0897	6.56002
DADNt4	100		DADNK	100	0		C204CRNt	99.976	0.315016		CYSTGLUex	96.0514	9.33213		CAATPS	98.0897	6.56002
DAG_HSter	100		DADNt4	100	0		C226COAtx	99.976	0.315016		CYSTHRNaEx	96.0514	9.33213		CAT2p	98.0897	6.56002
DAGK_hs	100		DAG_HSter	100	0		C226CPT1	99.976	0.315016		CYSTSERex	96.0514	9.33213		CAt7r	98.0897	6.56002
DAGKn_hs	100		DAGK_hs	100	0		C226CPT2	99.976	0.315016		CYTD	96.0514	9.33213		CATm	98.0897	6.56002
DAGt	100		DAGKn_hs	100	0		C226CRNt	99.976	0.315016		CYTDK1	96.0514	9.33213		CATp	98.0897	6.56002
DALAOXx	100		DAGt	100	0		C2M26DCOAHLm	99.976	0.315016		CYTDK2m	96.0514	9.33213		CBL2OR	98.0897	6.56002
DALAt2r	100		DALAOXx	100	0		C2M26DCOAHLx	99.976	0.315016		CYTDn	96.0514	9.33213		CBL2tm	98.0897	6.56002
DALAt2rL	100		DALAt2r	100	0		C3STDH1Pr	99.976	0.315016		CYTDt	96.0514	9.33213		CBLATm	98.0897	6.56002
DALAxt	100		DALAt2rL	100	0		C3STDH1r	99.976	0.315016		CYTDt4	96.0514	9.33213		CBPPer	98.0897	6.56002
DASCBH	100		DALAxt	100	0		C3STKR2r	99.976	0.315016		CYTDt5	96.0514	9.33213		CBPter	98.0897	6.56002
DASCBR	100		DASCBH	100	0		C4STMO1r	99.976	0.315016		CYTDtl	96.0514	9.33213		CBR1	98.0897	6.56002
DASPO1p	100		DASCBR	100	0		C4STMO2Pr	99.976	0.315016		CYTDtm	96.0514	9.33213		CBR2	98.0897	6.56002
DATPtn	100		DASPO1p	100	0		C4STMO2r	99.976	0.315016		CYTDtn	96.0514	9.33213		CCA_D3t	98.0897	6.56002
DCK1n	100		DATPtn	100	0		CAATPS	99.976	0.315016		CYTK1	96.0514	9.33213		CDIPTr	98.0897	6.56002
DCK2n	100		DCK1n	100	0		CAT2p	99.976	0.315016		CYTK10	96.0514	9.33213		CDPDAGtm	98.0897	6.56002
DCMPDA	100		DCK2n	100	0		CAt7r	99.976	0.315016		CYTK10n	96.0514	9.33213		CDS	98.0897	6.56002
DCSPTN1COAtx	100		DCMPDA	100	0		CATm	99.976	0.315016		CYTK11	96.0514	9.33213		CDSm	98.0897	6.56002
DCSPTN1CPT1	100		DCSPTN1COAtx	100	0		CATp	99.976	0.315016		CYTK11n	96.0514	9.33213		CEPTC	98.0897	6.56002
DCSPTN1CPT2	100		DCSPTN1CPT1	100	0		CBL2OR	99.976	0.315016		CYTK12	96.0514	9.33213		CEPTE	98.0897	6.56002
DCSPTN1CRNt	100		DCSPTN1CPT2	100	0		CBL2tm	99.976	0.315016		CYTK12n	96.0514	9.33213		CERT1gt	98.0897	6.56002
DCSPTN1t	100		DCSPTN1CRNt	100	0		CBLATm	99.976	0.315016		CYTK13	96.0514	9.33213		CERT1rt	98.0897	6.56002
DCTPtn	100		DCSPTN1t	100	0		CBPPer	99.976	0.315016		CYTK13n	96.0514	9.33213		CERT2gt	98.0897	6.56002
DCYTD	100		DCTPtn	100	0		CBPter	99.976	0.315016		CYTK14	96.0514	9.33213		CERT2rt	98.0897	6.56002
DCYTt	100		DCYTD	100	0		CBR1	99.976	0.315016		CYTK14n	96.0514	9.33213		CGLYt3(2)	98.0897	6.56002
DEBRISOQUINEt	100		DCYTt	100	0		CBR2	99.976	0.315016		CYTK1m	96.0514	9.33213		CHLP	98.0897	6.56002
DEDOLP1_L	100		DEBRISOQUINEt	100	0		CCA_D3t	99.976	0.315016		CYTK1n	96.0514	9.33213		CHLPCTD	98.0897	6.56002
DEDOLP1_U	100		DEDOLP1_L	100	0		CDIPTr	99.976	0.315016		CYTK2	96.0514	9.33213		CHLtm	98.0897	6.56002
DEDOLP2_L	100		DEDOLP1_U	100	0		CDS	99.976	0.315016		CYTK2n	96.0514	9.33213		CHOLATEt	98.0897	6.56002
DEDOLP2_U	100		DEDOLP2_L	100	0		CEPTC	99.976	0.315016		CYTK3	96.0514	9.33213		CHOLATEt2	98.0897	6.56002
DEDOLR_L	100		DEDOLP2_U	100	0		CEPTE	99.976	0.315016		CYTK3n	96.0514	9.33213		CHOLD2m	98.0897	6.56002
DEDOLR_U	100		DEDOLR_L	100	0		CERT1gt	99.976	0.315016		CYTK4	96.0514	9.33213		CHOLK	98.0897	6.56002
DESAT16_2	100		DEDOLR_U	100	0		CERT1rt	99.976	0.315016		CYTK4n	96.0514	9.33213		CHOLPtg	98.0897	6.56002
DESAT18_10	100		DESAT16_2	100	0		CERT2gt	99.976	0.315016		CYTK5	96.0514	9.33213		CHOLt4	98.0897	6.56002
DESAT18_3	100		DESAT18_10	100	0		CERT2rt	99.976	0.315016		CYTK5n	96.0514	9.33213		CHOLtg	98.0897	6.56002
DESAT18_4	100		DESAT18_3	100	0		CGLYt3(2)	99.976	0.315016		CYTK6	96.0514	9.33213		CHOLtn	98.0897	6.56002
DESAT18_5	100		DESAT18_4	100	0		CHLP	99.976	0.315016		CYTK6n	96.0514	9.33213		CHOLtr	98.0897	6.56002
DESAT18_6	100		DESAT18_5	100	0		CHLPCTD	99.976	0.315016		CYTK7	96.0514	9.33213		CHOLtu	98.0897	6.56002
DESAT18_7	100		DESAT18_6	100	0		CHOLATEt	99.976	0.315016		CYTK7n	96.0514	9.33213		CHSTEROLSULT	98.0897	6.56002
DESAT18_8	100		DESAT18_7	100	0		CHOLATEt2	99.976	0.315016		CYTK8	96.0514	9.33213		CHSTEROLt	98.0897	6.56002
DESAT18_9	100		DESAT18_8	100	0		CHOLK	99.976	0.315016		CYTK8n	96.0514	9.33213		CHSTEROLt1	98.0897	6.56002
DESAT20_1	100		DESAT18_9	100	0		CHOLPtg	99.976	0.315016		CYTK9	96.0514	9.33213		CHSTEROLt2	98.0897	6.56002
DESAT20_2	100		DESAT20_1	100	0		CHOLt4	99.976	0.315016		CYTK9n	96.0514	9.33213		CHSTEROLt3	98.0897	6.56002
DESAT22_1p	100		DESAT20_2	100	0		CHOLtg	99.976	0.315016		CytOxe-	96.0514	9.33213		CHSTEROLtg	98.0897	6.56002
DESAT22_2p	100		DESAT22_1p	100	0		CHOLtn	99.976	0.315016		D-LACt2	96.0514	9.33213		CHTNASE	98.0897	6.56002
DESAT24_1	100		DESAT22_2p	100	0		CHOLtr	99.976	0.315016		D-LACtm	96.0514	9.33213		CHTNASEe	98.0897	6.56002
DGAT	100		DESAT24_1	100	0		CHOLtu	99.976	0.315016		DADA	96.0514	9.33213		CITL	98.0897	6.56002
DGCHOLte	100		DGAT	100	0		CHSTEROLSULT	99.976	0.315016		DADAe	96.0514	9.33213		CITRtm	98.0897	6.56002
DGK1	100		DGCHOLte	100	0		CHSTEROLt	99.976	0.315016		DADNK	96.0514	9.33213		CITt4_2	98.0897	6.56002
DGK2m	100		DGK1	100	0		CHSTEROLt1	99.976	0.315016		DADNt4	96.0514	9.33213		CITt4_4	98.0897	6.56002
DGNSKm	100		DGK2m	100	0		CHSTEROLt2	99.976	0.315016		DAG_HSter	96.0514	9.33213		CITtam	98.0897	6.56002
DGSNt	100		DGNSKm	100	0		CHSTEROLt3	99.976	0.315016		DAGK_hs	96.0514	9.33213		CK	98.0897	6.56002
DGSNtm	100		DGSNt	100	0		CHSTEROLtg	99.976	0.315016		DAGKn_hs	96.0514	9.33213		CKc	98.0897	6.56002
DGTPtn	100		DGSNtm	100	0		CHTNASE	99.976	0.315016		DAGt	96.0514	9.33213		CLFORtex	98.0897	6.56002
DGULND	100		DGTPtn	100	0		CHTNASEe	99.976	0.315016		DALAOXx	96.0514	9.33213		CLFORtex2	98.0897	6.56002
DHAAt1r	100		DGULND	100	0		CITL	99.976	0.315016		DALAt2r	96.0514	9.33213		CLHCO3tex2	98.0897	6.56002
DHAPA	100		DHAAt1r	100	0		CITRtm	99.976	0.315016		DALAt2rL	96.0514	9.33213		CLHCOtex	98.0897	6.56002
DHAPAx	100		DHAPA	100	0		CITt4_2	99.976	0.315016		DALAxt	96.0514	9.33213		CLI2tex	98.0897	6.56002
DHCHOLESTANATEtm	100		DHAPAx	100	0		CITt4_4	99.976	0.315016		DASCBH	96.0514	9.33213		CLOHtex2	98.0897	6.56002
DHCR241r	100		DHCHOLESTANATEtm	100	0		CITtam	99.976	0.315016		DASCBR	96.0514	9.33213		CLOXAtex2	98.0897	6.56002
DHCR242r	100		DHCR241r	100	0		CK	99.976	0.315016		DASPO1p	96.0514	9.33213		CLPNDCOAtx	98.0897	6.56002
DHCR243r	100		DHCR242r	100	0		CKc	99.976	0.315016		DATPtn	96.0514	9.33213		CLPNDCPT1	98.0897	6.56002
DHCR71r	100		DHCR243r	100	0		CLFORtex	99.976	0.315016		DCK1n	96.0514	9.33213		CLPNDCPT2	98.0897	6.56002
DHCR72r	100		DHCR71r	100	0		CLFORtex2	99.976	0.315016		DCK2n	96.0514	9.33213		CLPNDCRNt	98.0897	6.56002
DHCRD1	100		DHCR72r	100	0		CLHCO3tex2	99.976	0.315016		DCMPDA	96.0514	9.33213		CLPNDt	98.0897	6.56002
DHCRD2	100		DHCRD1	100	0		CLHCOtex	99.976	0.315016		DCSPTN1COAtx	96.0514	9.33213		CLS_hs	98.0897	6.56002
DHDPBMTm	100		DHCRD2	100	0		CLI2tex	99.976	0.315016		DCSPTN1CPT1	96.0514	9.33213		CMPACNAtg	98.0897	6.56002
DHEASt	100		DHDPBMTm	100	0		CLOHtex2	99.976	0.315016		DCSPTN1CPT2	96.0514	9.33213		CMPACNAtn	98.0897	6.56002
DHEAStr	100		DHEASt	100	0		CLOXAtex2	99.976	0.315016		DCSPTN1CRNt	96.0514	9.33213		CMPSAS	98.0897	6.56002
DHEAtr	100		DHEAStr	100	0		CLPNDCOAtx	99.976	0.315016		DCSPTN1t	96.0514	9.33213		CMPSASn	98.0897	6.56002
DHFR	100		DHEAtr	100	0		CLPNDCPT1	99.976	0.315016		DCTPtn	96.0514	9.33213		CO2t	98.0897	6.56002
DHFtl	100		DHFR	100	0		CLPNDCPT2	99.976	0.315016		DCYTD	96.0514	9.33213		CO2ter	98.0897	6.56002
DHFtm	100		DHFtl	100	0		CLPNDCRNt	99.976	0.315016		DCYTt	96.0514	9.33213		CO2tg	98.0897	6.56002
DHPM1	100		DHFtm	100	0		CLPNDt	99.976	0.315016		DEBRISOQUINEt	96.0514	9.33213		CO2tn	98.0897	6.56002
DHPR	100		DHPM1	100	0		CLS_hs	99.976	0.315016		DEDOLP1_L	96.0514	9.33213		CO2tp	98.0897	6.56002
DHPR2	100		DHPR	100	0		CMPACNAtg	99.976	0.315016		DEDOLP1_U	96.0514	9.33213		COAtg	98.0897	6.56002
DIDPtn	100		DHPR2	100	0		CMPACNAtn	99.976	0.315016		DEDOLP2_L	96.0514	9.33213		COAtl	98.0897	6.56002
DIGALSGALSIDEte	100		DIDPtn	100	0		CMPSAS	99.976	0.315016		DEDOLP2_U	96.0514	9.33213		COAtm	98.0897	6.56002
DIGALSIDEtl	100		DIGALSGALSIDEte	100	0		CMPSASn	99.976	0.315016		DEDOLR_L	96.0514	9.33213		COAtn	98.0897	6.56002
DINt	100		DIGALSIDEtl	100	0		CO2t	99.976	0.315016		DEDOLR_U	96.0514	9.33213		COAtp	98.0897	6.56002
DITPtn	100		DINt	100	0		CO2ter	99.976	0.315016		DESAT16_2	96.0514	9.33213		COAtr	98.0897	6.56002
DLNLCGCPT1	100		DITPtn	100	0		CO2tg	99.976	0.315016		DESAT18_10	96.0514	9.33213		COKECBESr	98.0897	6.56002
DLNLCGCPT2	100		DLNLCGCPT1	100	0		CO2tm	99.976	0.315016		DESAT18_3	96.0514	9.33213		COQ3m	98.0897	6.56002
DLNLCGCRNt	100		DLNLCGCPT2	100	0		CO2tn	99.976	0.315016		DESAT18_4	96.0514	9.33213		COQ5m	98.0897	6.56002
DLNLCGt	100		DLNLCGCRNt	100	0		CO2tp	99.976	0.315016		DESAT18_5	96.0514	9.33213		COQ6m	98.0897	6.56002
DM_13-cis-oretn(n)	100		DLNLCGt	100	0		COAtg	99.976	0.315016		DESAT18_6	96.0514	9.33213		COQ7m	98.0897	6.56002
DM_13-cis-retn(n)	100		DM_13-cis-oretn(n)	100	0		COAtl	99.976	0.315016		DESAT18_7	96.0514	9.33213		CORE2GTg	98.0897	6.56002
DM_Asn-X-Ser/Thr(ly)	100		DM_13-cis-retn(n)	100	0		COAtm	99.976	0.315016		DESAT18_8	96.0514	9.33213		CORE6GTg	98.0897	6.56002
DM_atp(c)	100		DM_Asn-X-Ser/Thr(ly)	100	0		COAtn	99.976	0.315016		DESAT18_9	96.0514	9.33213		COt	98.0897	6.56002
DM_avite1(c)	100		DM_atp(c)	100	0		COAtp	99.976	0.315016		DESAT20_1	96.0514	9.33213		COUCOAFm	98.0897	6.56002
DM_avite2(c)	100		DM_avite1(c)	100	0		COAtr	99.976	0.315016		DESAT20_2	96.0514	9.33213		COUMARINte	98.0897	6.56002
DM_bvite(c)	100		DM_avite2(c)	100	0		COKECBESr	99.976	0.315016		DESAT22_1p	96.0514	9.33213		CPCTDTX	98.0897	6.56002
DM_datp(m)	100		DM_bvite(c)	100	0		COQ3m	99.976	0.315016		DESAT22_2p	96.0514	9.33213		CPPPGO	98.0897	6.56002
DM_datp(n)	100		DM_datp(m)	100	0		COQ5m	99.976	0.315016		DESAT24_1	96.0514	9.33213		CREATtmdiffir	98.0897	6.56002
DM_dctp(m)	100		DM_datp(n)	100	0		COQ6m	99.976	0.315016		DGAT	96.0514	9.33213		CRNCAR3tp	98.0897	6.56002
DM_dctp(n)	100		DM_dctp(m)	100	0		COQ7m	99.976	0.315016		DGCHOLte	96.0514	9.33213		CRNt	98.0897	6.56002
DM_dgtp(m)	100		DM_dctp(n)	100	0		CORE2GTg	99.976	0.315016		DGK1	96.0514	9.33213		CRNtHa	98.0897	6.56002
DM_dgtp(n)	100		DM_dgtp(m)	100	0		CORE6GTg	99.976	0.315016		DGK2m	96.0514	9.33213		CRNtim	98.0897	6.56002
DM_dsT_antigen(g)	100		DM_dgtp(n)	100	0		COt	99.976	0.315016		DGNSKm	96.0514	9.33213		CRNtuIR	98.0897	6.56002
DM_dttp(m)	100		DM_dsT_antigen(g)	100	0		COUCOAFm	99.976	0.315016		DGSNt	96.0514	9.33213		CRNtuNa	98.0897	6.56002
DM_dttp(n)	100		DM_dttp(m)	100	0		COUMARINte	99.976	0.315016		DGSNtm	96.0514	9.33213		CRNtx	98.0897	6.56002
DM_ethamp(r)	100		DM_dttp(n)	100	0		CPCTDTX	99.976	0.315016		DGTPtn	96.0514	9.33213		CRTSLt	98.0897	6.56002
DM_gpi_sig(er)	100		DM_ethamp(r)	100	0		CPPPGO	99.976	0.315016		DGULND	96.0514	9.33213		CRTSLtm	98.0897	6.56002
DM_kdn(c)	100		DM_gpi_sig(er)	100	0		CREATtmdiffir	99.976	0.315016		DHAAt1r	96.0514	9.33213		CRTSLtr	98.0897	6.56002
DM_m(em)3gacpail_prot_hs(r)	100		DM_kdn(c)	100	0		CRNCAR3tp	99.976	0.315016		DHAPA	96.0514	9.33213		CRTSTRNt	98.0897	6.56002
DM_mem2emgacpail_prot_hs(r)	100		DM_m(em)3gacpail_prot_hs(r)	100	0		CRNCARtp	99.976	0.315016		DHAPAx	96.0514	9.33213		CRTSTRNtm	98.0897	6.56002
DM_n5m2masn(g)	100		DM_mem2emgacpail_prot_hs(r)	100	0		CRNt	99.976	0.315016		DHCHOLESTANATEtm	96.0514	9.33213		CRTSTRNtr	98.0897	6.56002
DM_oretn(n)	100		DM_n5m2masn(g)	100	0		CRNtHa	99.976	0.315016		DHCR241r	96.0514	9.33213		CRVNCtr	98.0897	6.56002
DM_Ser-Gly/Ala-X-Gly(ly)	100		DM_oretn(n)	100	0		CRNtim	99.976	0.315016		DHCR242r	96.0514	9.33213		CSm	98.0897	6.56002
DM_Ser/Thr(ly)	100		DM_Ser-Gly/Ala-X-Gly(ly)	100	0		CRNtuIR	99.976	0.315016		DHCR243r	96.0514	9.33213		CSNAT	98.0897	6.56002
DM_sprm(c)	100		DM_Ser/Thr(ly)	100	0		CRNtuNa	99.976	0.315016		DHCR71r	96.0514	9.33213		CSNAT2m	98.0897	6.56002
DM_sTn_antigen(g)	100		DM_sprm(c)	100	0		CRNtx	99.976	0.315016		DHCR72r	96.0514	9.33213		CSNAT2x	98.0897	6.56002
DM_T_antigen(g)	100		DM_sTn_antigen(g)	100	0		CRTSLt	99.976	0.315016		DHCRD1	96.0514	9.33213		CSNAT3x	98.0897	6.56002
DM_yvite(c)	100		DM_T_antigen(g)	100	0		CRTSLtm	99.976	0.315016		DHCRD2	96.0514	9.33213		CSNATer	98.0897	6.56002
DMATT	100		DM_yvite(c)	100	0		CRTSLtr	99.976	0.315016		DHDPBMTm	96.0514	9.33213		CSNATm	98.0897	6.56002
DMATTx	100		DMATT	100	0		CRTSTRNt	99.976	0.315016		DHEASt	96.0514	9.33213		CSNATr	98.0897	6.56002
DMHPTCRNCPT1	100		DMATTx	100	0		CRTSTRNtm	99.976	0.315016		DHEAStr	96.0514	9.33213		CSNt	98.0897	6.56002
DMHPTCRNCPT2	100		DMHPTCRNCPT1	100	0		CRTSTRNtr	99.976	0.315016		DHEAtr	96.0514	9.33213		CSPG_At	98.0897	6.56002
DMHPTCRNt	100		DMHPTCRNCPT2	100	0		CRVNCtr	99.976	0.315016		DHFR	96.0514	9.33213		CSPG_Atly	98.0897	6.56002
DMHPTCRNte	100		DMHPTCRNt	100	0		CSm	99.976	0.315016		DHFtl	96.0514	9.33213		CSPG_Bt	98.0897	6.56002
DMNONCRNCPT2	100		DMHPTCRNte	100	0		CSNAT	99.976	0.315016		DHFtm	96.0514	9.33213		CSPG_Btly	98.0897	6.56002
DMNONCRNt	100		DMNONCRNCPT2	100	0		CSNAT2m	99.976	0.315016		DHPM1	96.0514	9.33213		CSPG_Ct	98.0897	6.56002
DNADDP	100		DMNONCRNt	100	0		CSNAT2x	99.976	0.315016		DIDPtn	96.0514	9.33213		CSPG_Ctly	98.0897	6.56002
DNADtn	100		DNADDP	100	0		CSNAT3x	99.976	0.315016		DIGALSGALSIDEte	96.0514	9.33213		CSPG_Dt	98.0897	6.56002
DNAMTn	100		DNADtn	100	0		CSNATer	99.976	0.315016		DIGALSIDEtl	96.0514	9.33213		CSPG_Dtly	98.0897	6.56002
DNAMTSEn	100		DNAMTn	100	0		CSNATm	99.976	0.315016		DINt	96.0514	9.33213		CSPG_Et	98.0897	6.56002
DNDPt10m	100		DNAMTSEn	100	0		CSNATp	99.976	0.315016		DITPtn	96.0514	9.33213		CSPG_Etly	98.0897	6.56002
DNDPt11m	100		DNDPt10m	100	0		CSNATr	99.976	0.315016		DLNLCGCPT1	96.0514	9.33213		CTPtn	98.0897	6.56002
DNDPt12m	100		DNDPt11m	100	0		CSNt	99.976	0.315016		DLNLCGCPT2	96.0514	9.33213		CYANSTm	98.0897	6.56002
DNDPt13m	100		DNDPt12m	100	0		CSPG_At	99.976	0.315016		DLNLCGCRNt	96.0514	9.33213		CYANt	98.0897	6.56002
DNDPt14m	100		DNDPt13m	100	0		CSPG_Atly	99.976	0.315016		DLNLCGt	96.0514	9.33213		CYANtm	98.0897	6.56002
DNDPt15m	100		DNDPt14m	100	0		CSPG_Bt	99.976	0.315016		DM_13-cis-oretn(n)	96.0514	9.33213		CYOOm2	98.0897	6.56002
DNDPt16m	100		DNDPt15m	100	0		CSPG_Btly	99.976	0.315016		DM_13-cis-retn(n)	96.0514	9.33213		CYOOm3	98.0897	6.56002
DNDPt17m	100		DNDPt16m	100	0		CSPG_Ct	99.976	0.315016		DM_Asn-X-Ser/Thr(ly)	96.0514	9.33213		CYOR-u10m	98.0897	6.56002
DNDPt18m	100		DNDPt17m	100	0		CSPG_Ctly	99.976	0.315016		DM_atp(c)	96.0514	9.33213		CYSALANaEx	98.0897	6.56002
DNDPt19m	100		DNDPt18m	100	0		CSPG_Dt	99.976	0.315016		DM_avite1(c)	96.0514	9.33213		CYSASNNaEx	98.0897	6.56002
DNDPt1m	100		DNDPt19m	100	0		CSPG_Dtly	99.976	0.315016		DM_avite2(c)	96.0514	9.33213		CYSGLNNaEx	98.0897	6.56002
DNDPt20m	100		DNDPt1m	100	0		CSPG_Et	99.976	0.315016		DM_bvite(c)	96.0514	9.33213		CYSGLUexR	98.0897	6.56002
DNDPt21m	100		DNDPt20m	100	0		CSPG_Etly	99.976	0.315016		DM_datp(m)	96.0514	9.33213		CYSGLYex	98.0897	6.56002
DNDPt22m	100		DNDPt21m	100	0		CTPtn	99.976	0.315016		DM_datp(n)	96.0514	9.33213		CYSGLYexR	98.0897	6.56002
DNDPt23m	100		DNDPt22m	100	0		CYANSTm	99.976	0.315016		DM_dctp(m)	96.0514	9.33213		CYSSERNaEx	98.0897	6.56002
DNDPt24m	100		DNDPt23m	100	0		CYANt	99.976	0.315016		DM_dctp(n)	96.0514	9.33213		CYSt4	98.0897	6.56002
DNDPt25m	100		DNDPt24m	100	0		CYANtm	99.976	0.315016		DM_dgtp(m)	96.0514	9.33213		CYSTAm	98.0897	6.56002
DNDPt26m	100		DNDPt25m	100	0		CYOOm2	99.976	0.315016		DM_dgtp(n)	96.0514	9.33213		CYStec	98.0897	6.56002
DNDPt27m	100		DNDPt26m	100	0		CYOOm3	99.976	0.315016		DM_dsT_antigen(g)	96.0514	9.33213		CYSTGLUex	98.0897	6.56002
DNDPt28m	100		DNDPt27m	100	0		CYOR-u10m	99.976	0.315016		DM_dttp(m)	96.0514	9.33213		CYSTHRNaEx	98.0897	6.56002
DNDPt29m	100		DNDPt28m	100	0		CYSALANaEx	99.976	0.315016		DM_dttp(n)	96.0514	9.33213		CYSTSERex	98.0897	6.56002
DNDPt2m	100		DNDPt29m	100	0		CYSASNNaEx	99.976	0.315016		DM_ethamp(r)	96.0514	9.33213		CYTD	98.0897	6.56002
DNDPt30m	100		DNDPt2m	100	0		CYSGLNNaEx	99.976	0.315016		DM_gpi_sig(er)	96.0514	9.33213		CYTDK1	98.0897	6.56002
DNDPt31m	100		DNDPt30m	100	0		CYSGLUexR	99.976	0.315016		DM_kdn(c)	96.0514	9.33213		CYTDK2m	98.0897	6.56002
DNDPt32m	100		DNDPt31m	100	0		CYSGLYex	99.976	0.315016		DM_m(em)3gacpail_prot_hs(r)	96.0514	9.33213		CYTDn	98.0897	6.56002
DNDPt33m	100		DNDPt32m	100	0		CYSGLYexR	99.976	0.315016		DM_mem2emgacpail_prot_hs(r)	96.0514	9.33213		CYTDt	98.0897	6.56002
DNDPt34m	100		DNDPt33m	100	0		CYSSERNaEx	99.976	0.315016		DM_n5m2masn(g)	96.0514	9.33213		CYTDt4	98.0897	6.56002
DNDPt35m	100		DNDPt34m	100	0		CYSt4	99.976	0.315016		DM_oretn(n)	96.0514	9.33213		CYTDt5	98.0897	6.56002
DNDPt36m	100		DNDPt35m	100	0		CYSTAm	99.976	0.315016		DM_Ser-Gly/Ala-X-Gly(ly)	96.0514	9.33213		CYTDtl	98.0897	6.56002
DNDPt37m	100		DNDPt36m	100	0		CYStec	99.976	0.315016		DM_Ser/Thr(ly)	96.0514	9.33213		CYTDtm	98.0897	6.56002
DNDPt38m	100		DNDPt37m	100	0		CYSTGLUex	99.976	0.315016		DM_sprm(c)	96.0514	9.33213		CYTDtn	98.0897	6.56002
DNDPt39m	100		DNDPt38m	100	0		CYSTHRNaEx	99.976	0.315016		DM_sTn_antigen(g)	96.0514	9.33213		CYTK1	98.0897	6.56002
DNDPt3m	100		DNDPt39m	100	0		CYSTSERex	99.976	0.315016		DM_T_antigen(g)	96.0514	9.33213		CYTK10	98.0897	6.56002
DNDPt40m	100		DNDPt3m	100	0		CYTD	99.976	0.315016		DM_yvite(c)	96.0514	9.33213		CYTK10n	98.0897	6.56002
DNDPt41m	100		DNDPt40m	100	0		CYTDK1	99.976	0.315016		DMATT	96.0514	9.33213		CYTK11	98.0897	6.56002
DNDPt42m	100		DNDPt41m	100	0		CYTDn	99.976	0.315016		DMATTx	96.0514	9.33213		CYTK11n	98.0897	6.56002
DNDPt43m	100		DNDPt42m	100	0		CYTDt	99.976	0.315016		DMHPTCRNCPT1	96.0514	9.33213		CYTK12	98.0897	6.56002
DNDPt44m	100		DNDPt43m	100	0		CYTDt4	99.976	0.315016		DMHPTCRNCPT2	96.0514	9.33213		CYTK12n	98.0897	6.56002
DNDPt45m	100		DNDPt44m	100	0		CYTDt5	99.976	0.315016		DMHPTCRNt	96.0514	9.33213		CYTK13	98.0897	6.56002
DNDPt46m	100		DNDPt45m	100	0		CYTDtl	99.976	0.315016		DMHPTCRNte	96.0514	9.33213		CYTK13n	98.0897	6.56002
DNDPt47m	100		DNDPt46m	100	0		CYTDtn	99.976	0.315016		DMNONCRNCPT2	96.0514	9.33213		CYTK14	98.0897	6.56002
DNDPt48m	100		DNDPt47m	100	0		CYTK1	99.976	0.315016		DMNONCRNt	96.0514	9.33213		CYTK14n	98.0897	6.56002
DNDPt49m	100		DNDPt48m	100	0		CYTK10	99.976	0.315016		DNADDP	96.0514	9.33213		CYTK1m	98.0897	6.56002
DNDPt4m	100		DNDPt49m	100	0		CYTK10n	99.976	0.315016		DNADtn	96.0514	9.33213		CYTK1n	98.0897	6.56002
DNDPt50m	100		DNDPt4m	100	0		CYTK11	99.976	0.315016		DNAMTn	96.0514	9.33213		CYTK2	98.0897	6.56002
DNDPt51m	100		DNDPt50m	100	0		CYTK11n	99.976	0.315016		DNAMTSEn	96.0514	9.33213		CYTK2n	98.0897	6.56002
DNDPt52m	100		DNDPt51m	100	0		CYTK12	99.976	0.315016		DNDPt10m	96.0514	9.33213		CYTK3	98.0897	6.56002
DNDPt53m	100		DNDPt52m	100	0		CYTK12n	99.976	0.315016		DNDPt11m	96.0514	9.33213		CYTK3n	98.0897	6.56002
DNDPt54m	100		DNDPt53m	100	0		CYTK13	99.976	0.315016		DNDPt12m	96.0514	9.33213		CYTK4	98.0897	6.56002
DNDPt55m	100		DNDPt54m	100	0		CYTK13n	99.976	0.315016		DNDPt13m	96.0514	9.33213		CYTK4n	98.0897	6.56002
DNDPt56m	100		DNDPt55m	100	0		CYTK14	99.976	0.315016		DNDPt14m	96.0514	9.33213		CYTK5	98.0897	6.56002
DNDPt57m	100		DNDPt56m	100	0		CYTK14n	99.976	0.315016		DNDPt15m	96.0514	9.33213		CYTK5n	98.0897	6.56002
DNDPt58m	100		DNDPt57m	100	0		CYTK1n	99.976	0.315016		DNDPt16m	96.0514	9.33213		CYTK6	98.0897	6.56002
DNDPt59m	100		DNDPt58m	100	0		CYTK2	99.976	0.315016		DNDPt17m	96.0514	9.33213		CYTK6n	98.0897	6.56002
DNDPt5m	100		DNDPt59m	100	0		CYTK2n	99.976	0.315016		DNDPt18m	96.0514	9.33213		CYTK7	98.0897	6.56002
DNDPt60m	100		DNDPt5m	100	0		CYTK3	99.976	0.315016		DNDPt19m	96.0514	9.33213		CYTK7n	98.0897	6.56002
DNDPt61m	100		DNDPt60m	100	0		CYTK3n	99.976	0.315016		DNDPt1m	96.0514	9.33213		CYTK8	98.0897	6.56002
DNDPt62m	100		DNDPt61m	100	0		CYTK4	99.976	0.315016		DNDPt20m	96.0514	9.33213		CYTK8n	98.0897	6.56002
DNDPt63m	100		DNDPt62m	100	0		CYTK4n	99.976	0.315016		DNDPt21m	96.0514	9.33213		CYTK9	98.0897	6.56002
DNDPt6m	100		DNDPt63m	100	0		CYTK5	99.976	0.315016		DNDPt22m	96.0514	9.33213		CYTK9n	98.0897	6.56002
DNDPt7m	100		DNDPt6m	100	0		CYTK5n	99.976	0.315016		DNDPt23m	96.0514	9.33213		CytOxe-	98.0897	6.56002
DNDPt8m	100		DNDPt7m	100	0		CYTK6	99.976	0.315016		DNDPt24m	96.0514	9.33213		D-LACt2	98.0897	6.56002
DNDPt9m	100		DNDPt8m	100	0		CYTK6n	99.976	0.315016		DNDPt25m	96.0514	9.33213		D-LACtm	98.0897	6.56002
DOGULND1	100		DNDPt9m	100	0		CYTK7	99.976	0.315016		DNDPt26m	96.0514	9.33213		DADA	98.0897	6.56002
DOGULND2	100		DOGULND1	100	0		CYTK7n	99.976	0.315016		DNDPt27m	96.0514	9.33213		DADAe	98.0897	6.56002
DOGULNO1	100		DOGULND2	100	0		CYTK8	99.976	0.315016		DNDPt28m	96.0514	9.33213		DADNK	98.0897	6.56002
DOGULNO2	100		DOGULNO1	100	0		CYTK8n	99.976	0.315016		DNDPt29m	96.0514	9.33213		DADNt4	98.0897	6.56002
DOLASNT_Ler	100		DOGULNO2	100	0		CYTK9	99.976	0.315016		DNDPt2m	96.0514	9.33213		DAG_HSter	98.0897	6.56002
DOLASNT_Uer	100		DOLASNT_Ler	100	0		CYTK9n	99.976	0.315016		DNDPt30m	96.0514	9.33213		DAGK_hs	98.0897	6.56002
DOLDPP_Ler	100		DOLASNT_Uer	100	0		CytOxe-	99.976	0.315016		DNDPt31m	96.0514	9.33213		DAGKn_hs	98.0897	6.56002
DOLDPP_Uer	100		DOLDPP_Ler	100	0		D-LACt2	99.976	0.315016		DNDPt32m	96.0514	9.33213		DAGt	98.0897	6.56002
DOLGLCP_Lter	100		DOLDPP_Uer	100	0		D-LACtm	99.976	0.315016		DNDPt33m	96.0514	9.33213		DALAOXx	98.0897	6.56002
DOLGLCP_Uter	100		DOLGLCP_Lter	100	0		DADA	99.976	0.315016		DNDPt34m	96.0514	9.33213		DALAt2r	98.0897	6.56002
DOLGPP_Ler	100		DOLGLCP_Uter	100	0		DADAe	99.976	0.315016		DNDPt35m	96.0514	9.33213		DALAt2rL	98.0897	6.56002
DOLGPP_Uer	100		DOLGPP_Ler	100	0		DADNK	99.976	0.315016		DNDPt36m	96.0514	9.33213		DALAxt	98.0897	6.56002
DOLICHOL_Lter	100		DOLGPP_Uer	100	0		DADNt4	99.976	0.315016		DNDPt37m	96.0514	9.33213		DASCBH	98.0897	6.56002
DOLICHOL_Uter	100		DOLICHOL_Lter	100	0		DAG_HSter	99.976	0.315016		DNDPt38m	96.0514	9.33213		DASCBR	98.0897	6.56002
DOLK_L	100		DOLICHOL_Uter	100	0		DAGK_hs	99.976	0.315016		DNDPt39m	96.0514	9.33213		DASPO1p	98.0897	6.56002
DOLK_U	100		DOLK_L	100	0		DAGKn_hs	99.976	0.315016		DNDPt3m	96.0514	9.33213		DCK1n	98.0897	6.56002
DOLMANP_Lter	100		DOLK_U	100	0		DAGt	99.976	0.315016		DNDPt40m	96.0514	9.33213		DCK2n	98.0897	6.56002
DOLMANP_Uter	100		DOLMANP_Lter	100	0		DALAOXx	99.976	0.315016		DNDPt41m	96.0514	9.33213		DCMPDA	98.0897	6.56002
DOLP_Lter	100		DOLMANP_Uter	100	0		DALAt2r	99.976	0.315016		DNDPt42m	96.0514	9.33213		DCSPTN1COAtx	98.0897	6.56002
DOLP_Uter	100		DOLP_Lter	100	0		DALAt2rL	99.976	0.315016		DNDPt43m	96.0514	9.33213		DCSPTN1CPT1	98.0897	6.56002
DOLPGT1_Ler	100		DOLP_Uter	100	0		DALAxt	99.976	0.315016		DNDPt44m	96.0514	9.33213		DCSPTN1CPT2	98.0897	6.56002
DOLPGT1_Uer	100		DOLPGT1_Ler	100	0		DASCBH	99.976	0.315016		DNDPt45m	96.0514	9.33213		DCSPTN1CRNt	98.0897	6.56002
DOLPGT2_Ler	100		DOLPGT1_Uer	100	0		DASCBR	99.976	0.315016		DNDPt46m	96.0514	9.33213		DCSPTN1t	98.0897	6.56002
DOLPGT2_Uer	100		DOLPGT2_Ler	100	0		DASPO1p	99.976	0.315016		DNDPt47m	96.0514	9.33213		DCYTD	98.0897	6.56002
DOLPGT3_Ler	100		DOLPGT2_Uer	100	0		DCK1n	99.976	0.315016		DNDPt48m	96.0514	9.33213		DEBRISOQUINEt	98.0897	6.56002
DOLPGT3_Uer	100		DOLPGT3_Ler	100	0		DCK2n	99.976	0.315016		DNDPt49m	96.0514	9.33213		DEDOLP1_L	98.0897	6.56002
DOLPH_Ler	100		DOLPGT3_Uer	100	0		DCMPDA	99.976	0.315016		DNDPt4m	96.0514	9.33213		DEDOLP1_U	98.0897	6.56002
DOLPH_Uer	100		DOLPH_Ler	100	0		DCSPTN1COAtx	99.976	0.315016		DNDPt50m	96.0514	9.33213		DEDOLP2_L	98.0897	6.56002
DOLPMT_L	100		DOLPH_Uer	100	0		DCSPTN1CPT1	99.976	0.315016		DNDPt51m	96.0514	9.33213		DEDOLP2_U	98.0897	6.56002
DOLPMT_U	100		DOLPMT_L	100	0		DCSPTN1CPT2	99.976	0.315016		DNDPt52m	96.0514	9.33213		DEDOLR_L	98.0897	6.56002
DOLPMT1_Ler	100		DOLPMT_U	100	0		DCSPTN1CRNt	99.976	0.315016		DNDPt53m	96.0514	9.33213		DEDOLR_U	98.0897	6.56002
DOLPMT1_Uer	100		DOLPMT1_Ler	100	0		DCSPTN1t	99.976	0.315016		DNDPt54m	96.0514	9.33213		DESAT16_2	98.0897	6.56002
DOLPMT2_Ler	100		DOLPMT1_Uer	100	0		DCYTD	99.976	0.315016		DNDPt55m	96.0514	9.33213		DESAT18_10	98.0897	6.56002
DOLPMT2_Uer	100		DOLPMT2_Ler	100	0		DEBRISOQUINEt	99.976	0.315016		DNDPt56m	96.0514	9.33213		DESAT18_3	98.0897	6.56002
DOLPMT3_Ler	100		DOLPMT2_Uer	100	0		DEDOLP1_L	99.976	0.315016		DNDPt57m	96.0514	9.33213		DESAT18_4	98.0897	6.56002
DOLPMT3_Uer	100		DOLPMT3_Ler	100	0		DEDOLP1_U	99.976	0.315016		DNDPt58m	96.0514	9.33213		DESAT18_5	98.0897	6.56002
DOLPMT4_Ler	100		DOLPMT3_Uer	100	0		DEDOLP2_L	99.976	0.315016		DNDPt59m	96.0514	9.33213		DESAT18_6	98.0897	6.56002
DOLPMT4_Uer	100		DOLPMT4_Ler	100	0		DEDOLP2_U	99.976	0.315016		DNDPt5m	96.0514	9.33213		DESAT18_7	98.0897	6.56002
DOPABMO	100		DOLPMT4_Uer	100	0		DEDOLR_L	99.976	0.315016		DNDPt60m	96.0514	9.33213		DESAT18_8	98.0897	6.56002
DOPAMT	100		DOPABMO	100	0		DEDOLR_U	99.976	0.315016		DNDPt61m	96.0514	9.33213		DESAT18_9	98.0897	6.56002
DOPASFt	100		DOPAMT	100	0		DESAT16_2	99.976	0.315016		DNDPt62m	96.0514	9.33213		DESAT20_1	98.0897	6.56002
DOPASULT	100		DOPASFt	100	0		DESAT18_10	99.976	0.315016		DNDPt63m	96.0514	9.33213		DESAT20_2	98.0897	6.56002
DOPAt4(2)r	100		DOPASULT	100	0		DESAT18_3	99.976	0.315016		DNDPt6m	96.0514	9.33213		DESAT22_1p	98.0897	6.56002
DOPAtu	100		DOPAt4(2)r	100	0		DESAT18_4	99.976	0.315016		DNDPt7m	96.0514	9.33213		DESAT22_2p	98.0897	6.56002
DOPAVESSEC	100		DOPAtu	100	0		DESAT18_5	99.976	0.315016		DNDPt8m	96.0514	9.33213		DESAT24_1	98.0897	6.56002
DPCOAK	100		DOPAVESSEC	100	0		DESAT18_6	99.976	0.315016		DNDPt9m	96.0514	9.33213		DGCHOLte	98.0897	6.56002
DPCOAPP	100		DPCOAK	100	0		DESAT18_7	99.976	0.315016		DOGULND1	96.0514	9.33213		DGK1	98.0897	6.56002
DPCOAtl	100		DPCOAPP	100	0		DESAT18_8	99.976	0.315016		DOGULND2	96.0514	9.33213		DGULND	98.0897	6.56002
DPHMBDCm	100		DPCOAtl	100	0		DESAT18_9	99.976	0.315016		DOGULNO1	96.0514	9.33213		DHAAt1r	98.0897	6.56002
DPMVDx	100		DPHMBDCm	100	0		DESAT20_1	99.976	0.315016		DOGULNO2	96.0514	9.33213		DHAPA	98.0897	6.56002
DRIBt	100		DPMVDx	100	0		DESAT20_2	99.976	0.315016		DOLASNT_Ler	96.0514	9.33213		DHAPAx	98.0897	6.56002
DRPA	100		DRIBt	100	0		DESAT22_1p	99.976	0.315016		DOLASNT_Uer	96.0514	9.33213		DHCHOLESTANATEtm	98.0897	6.56002
DSAT	100		DRPA	100	0		DESAT22_2p	99.976	0.315016		DOLDPP_Ler	96.0514	9.33213		DHCR241r	98.0897	6.56002
DTDPtn	100		DSAT	100	0		DESAT24_1	99.976	0.315016		DOLDPP_Uer	96.0514	9.33213		DHCR242r	98.0897	6.56002
DTMPK	100		DTDPtn	100	0		DGAT	99.976	0.315016		DOLGLCP_Lter	96.0514	9.33213		DHCR243r	98.0897	6.56002
DTTPtn	100		DTMPK	100	0		DGCHOLte	99.976	0.315016		DOLGLCP_Uter	96.0514	9.33213		DHCR71r	98.0897	6.56002
DUDPtn	100		DTTPtn	100	0		DGK1	99.976	0.315016		DOLGPP_Ler	96.0514	9.33213		DHCR72r	98.0897	6.56002
DUMPtn	100		DUDPtn	100	0		DGULND	99.976	0.315016		DOLGPP_Uer	96.0514	9.33213		DHCRD2	98.0897	6.56002
DURAD	100		DUMPtn	100	0		DHAAt1r	99.976	0.315016		DOLICHOL_Lter	96.0514	9.33213		DHDPBMTm	98.0897	6.56002
DURAD2	100		DURAD	100	0		DHAPA	99.976	0.315016		DOLICHOL_Uter	96.0514	9.33213		DHEASt	98.0897	6.56002
DURIK1	100		DURAD2	100	0		DHAPAx	99.976	0.315016		DOLK_L	96.0514	9.33213		DHEAStr	98.0897	6.56002
DURIK1m	100		DURIK1	100	0		DHCHOLESTANATEtm	99.976	0.315016		DOLK_U	96.0514	9.33213		DHEAtr	98.0897	6.56002
DURIPP	100		DURIK1m	100	0		DHCR241r	99.976	0.315016		DOLMANP_Lter	96.0514	9.33213		DHFtl	98.0897	6.56002
DURIt	100		DURIPP	100	0		DHCR242r	99.976	0.315016		DOLMANP_Uter	96.0514	9.33213		DHFtm	98.0897	6.56002
DURItn	100		DURIt	100	0		DHCR243r	99.976	0.315016		DOLP_Lter	96.0514	9.33213		DHPM1	98.0897	6.56002
DUTPDPm	100		DURItn	100	0		DHCR71r	99.976	0.315016		DOLP_Uter	96.0514	9.33213		DIDPtn	98.0897	6.56002
DUTPDPn	100		DUTPDPm	100	0		DHCR72r	99.976	0.315016		DOLPGT1_Ler	96.0514	9.33213		DIGALSGALSIDEte	98.0897	6.56002
EAFLATOXINte	100		DUTPDPn	100	0		DHDPBMTm	99.976	0.315016		DOLPGT1_Uer	96.0514	9.33213		DIGALSIDEtl	98.0897	6.56002
EBASTINEOHte	100		EAFLATOXINte	100	0		DHEASt	99.976	0.315016		DOLPGT2_Ler	96.0514	9.33213		DITPtn	98.0897	6.56002
EBASTINEte	100		EBASTINEOHte	100	0		DHEAStr	99.976	0.315016		DOLPGT2_Uer	96.0514	9.33213		DLNLCGCPT1	98.0897	6.56002
EBP1r	100		EBASTINEte	100	0		DHEAtr	99.976	0.315016		DOLPGT3_Ler	96.0514	9.33213		DLNLCGCPT2	98.0897	6.56002
EBP2r	100		EBP1r	100	0		DHFtl	99.976	0.315016		DOLPGT3_Uer	96.0514	9.33213		DLNLCGCRNt	98.0897	6.56002
ECOAH12m	100		EBP2r	100	0		DHFtm	99.976	0.315016		DOLPH_Ler	96.0514	9.33213		DLNLCGt	98.0897	6.56002
ECOAH1m	100		ECOAH12m	100	0		DHPM1	99.976	0.315016		DOLPH_Uer	96.0514	9.33213		DM_13-cis-oretn(n)	98.0897	6.56002
ECOAH1x	100		ECOAH1m	100	0		DIDPtn	99.976	0.315016		DOLPMT_L	96.0514	9.33213		DM_13-cis-retn(n)	98.0897	6.56002
ECOAH9m	100		ECOAH1x	100	0		DIGALSGALSIDEte	99.976	0.315016		DOLPMT_U	96.0514	9.33213		DM_Asn-X-Ser/Thr(ly)	98.0897	6.56002
EGMESTr	100		ECOAH9m	100	0		DIGALSIDEtl	99.976	0.315016		DOLPMT1_Ler	96.0514	9.33213		DM_atp(c)	98.0897	6.56002
EHGLAT	100		EGMESTr	100	0		DITPtn	99.976	0.315016		DOLPMT1_Uer	96.0514	9.33213		DM_avite1(c)	98.0897	6.56002
EHGLAT2m	100		EHGLAT	100	0		DLNLCGCPT1	99.976	0.315016		DOLPMT2_Ler	96.0514	9.33213		DM_avite2(c)	98.0897	6.56002
EHGLATm	100		EHGLAT2m	100	0		DLNLCGCPT2	99.976	0.315016		DOLPMT2_Uer	96.0514	9.33213		DM_bvite(c)	98.0897	6.56002
EICOSTETCPT1	100		EHGLATm	100	0		DLNLCGCRNt	99.976	0.315016		DOLPMT3_Ler	96.0514	9.33213		DM_dsT_antigen(g)	98.0897	6.56002
EICOSTETCPT2	100		EICOSTETCPT1	100	0		DLNLCGt	99.976	0.315016		DOLPMT3_Uer	96.0514	9.33213		DM_gpi_sig(er)	98.0897	6.56002
EICOSTETCRNt	100		EICOSTETCPT2	100	0		DM_13-cis-oretn(n)	99.976	0.315016		DOLPMT4_Ler	96.0514	9.33213		DM_kdn(c)	98.0897	6.56002
EICOSTETt	100		EICOSTETCRNt	100	0		DM_13-cis-retn(n)	99.976	0.315016		DOLPMT4_Uer	96.0514	9.33213		DM_m(em)3gacpail_prot_hs(r)	98.0897	6.56002
ELAIDCPT1	100		EICOSTETt	100	0		DM_Asn-X-Ser/Thr(ly)	99.976	0.315016		DOPABMO	96.0514	9.33213		DM_mem2emgacpail_prot_hs(r)	98.0897	6.56002
ELAIDCPT2	100		ELAIDCPT1	100	0		DM_atp(c)	99.976	0.315016		DOPAMT	96.0514	9.33213		DM_n5m2masn(g)	98.0897	6.56002
ELAIDCRNt	100		ELAIDCPT2	100	0		DM_avite1(c)	99.976	0.315016		DOPASFt	96.0514	9.33213		DM_oretn(n)	98.0897	6.56002
ELAIDt	100		ELAIDCRNt	100	0		DM_avite2(c)	99.976	0.315016		DOPASULT	96.0514	9.33213		DM_Ser-Gly/Ala-X-Gly(ly)	98.0897	6.56002
ENGASE	100		ELAIDt	100	0		DM_bvite(c)	99.976	0.315016		DOPAt4(2)r	96.0514	9.33213		DM_Ser/Thr(ly)	98.0897	6.56002
ENGASE2	100		ENGASE	100	0		DM_dsT_antigen(g)	99.976	0.315016		DOPAtu	96.0514	9.33213		DM_sprm(c)	98.0897	6.56002
ENGASE2ly	100		ENGASE2	100	0		DM_gpi_sig(er)	99.976	0.315016		DOPAVESSEC	96.0514	9.33213		DM_sTn_antigen(g)	98.0897	6.56002
ENMAN1g	100		ENGASE2ly	100	0		DM_kdn(c)	99.976	0.315016		DPCOAK	96.0514	9.33213		DM_T_antigen(g)	98.0897	6.56002
ENMAN2g	100		ENMAN1g	100	0		DM_m(em)3gacpail_prot_hs(r)	99.976	0.315016		DPCOAPP	96.0514	9.33213		DM_yvite(c)	98.0897	6.56002
ENMAN3g	100		ENMAN2g	100	0		DM_mem2emgacpail_prot_hs(r)	99.976	0.315016		DPCOAtl	96.0514	9.33213		DMATT	98.0897	6.56002
ENMAN4g	100		ENMAN3g	100	0		DM_n5m2masn(g)	99.976	0.315016		DPHMBDCm	96.0514	9.33213		DMATTx	98.0897	6.56002
ENMAN5g	100		ENMAN4g	100	0		DM_oretn(n)	99.976	0.315016		DPMVDx	96.0514	9.33213		DMHPTCRNCPT1	98.0897	6.56002
ENMAN6g	100		ENMAN5g	100	0		DM_Ser-Gly/Ala-X-Gly(ly)	99.976	0.315016		DRIBt	96.0514	9.33213		DMHPTCRNCPT2	98.0897	6.56002
ENO	100		ENMAN6g	100	0		DM_Ser/Thr(ly)	99.976	0.315016		DRPA	96.0514	9.33213		DMHPTCRNt	98.0897	6.56002
ESTRADIOLGLCt	100		ENO	100	0		DM_sprm(c)	99.976	0.315016		DSAT	96.0514	9.33213		DMHPTCRNte	98.0897	6.56002
ESTRADIOLGLCt2	100		ESTRADIOLGLCt	100	0		DM_sTn_antigen(g)	99.976	0.315016		DTDPtn	96.0514	9.33213		DMNONCRNCPT2	98.0897	6.56002
ESTRADIOLGLCtr	100		ESTRADIOLGLCt2	100	0		DM_T_antigen(g)	99.976	0.315016		DTMPK	96.0514	9.33213		DMNONCRNt	98.0897	6.56002
ESTRADIOLt	100		ESTRADIOLGLCtr	100	0		DM_yvite(c)	99.976	0.315016		DTTPtn	96.0514	9.33213		DNADDP	98.0897	6.56002
ESTRADIOLtr	100		ESTRADIOLt	100	0		DMATT	99.976	0.315016		DUDPtn	96.0514	9.33213		DNADtn	98.0897	6.56002
ESTRIOLGLCte	100		ESTRADIOLtr	100	0		DMATTx	99.976	0.315016		DUMPtn	96.0514	9.33213		DNAMTn	98.0897	6.56002
ESTRIOLGLCtr	100		ESTRIOLGLCte	100	0		DMHPTCRNCPT1	99.976	0.315016		DURAD	96.0514	9.33213		DNAMTSEn	98.0897	6.56002
ESTRONEGLCt	100		ESTRIOLGLCtr	100	0		DMHPTCRNCPT2	99.976	0.315016		DURAD2	96.0514	9.33213		DNDPt10m	98.0897	6.56002
ESTRONEGLCtr	100		ESTRONEGLCt	100	0		DMHPTCRNt	99.976	0.315016		DURIK1	96.0514	9.33213		DNDPt11m	98.0897	6.56002
ESTRONESt	100		ESTRONEGLCtr	100	0		DMHPTCRNte	99.976	0.315016		DURIK1m	96.0514	9.33213		DNDPt14m	98.0897	6.56002
ESTRONESt2	100		ESTRONESt	100	0		DMNONCRNCPT2	99.976	0.315016		DURIPP	96.0514	9.33213		DNDPt15m	98.0897	6.56002
ESTRONEtr	100		ESTRONESt2	100	0		DMNONCRNt	99.976	0.315016		DURIt	96.0514	9.33213		DNDPt16m	98.0897	6.56002
ESTSULT	100		ESTRONEtr	100	0		DNADDP	99.976	0.315016		DURItn	96.0514	9.33213		DNDPt17m	98.0897	6.56002
ETF	100		ESTSULT	100	0		DNADtn	99.976	0.315016		DUTPDPm	96.0514	9.33213		DNDPt22m	98.0897	6.56002
ETFQO	100		ETF	100	0		DNAMTn	99.976	0.315016		DUTPDPn	96.0514	9.33213		DNDPt23m	98.0897	6.56002
ETHAK	100		ETFQO	100	0		DNAMTSEn	99.976	0.315016		EAFLATOXINte	96.0514	9.33213		DNDPt24m	98.0897	6.56002
ETHP	100		ETHAK	100	0		DNDPt10m	99.976	0.315016		EBASTINEOHte	96.0514	9.33213		DNDPt25m	98.0897	6.56002
ETOHMO	100		ETHP	100	0		DNDPt11m	99.976	0.315016		EBASTINEte	96.0514	9.33213		DNDPt26m	98.0897	6.56002
ETOHt	100		ETOHMO	100	0		DNDPt14m	99.976	0.315016		EBP1r	96.0514	9.33213		DNDPt27m	98.0897	6.56002
ETOHtx	100		ETOHt	100	0		DNDPt15m	99.976	0.315016		EBP2r	96.0514	9.33213		DNDPt28m	98.0897	6.56002
EX_10fthf(e)	100		ETOHtx	100	0		DNDPt16m	99.976	0.315016		ECOAH1m	96.0514	9.33213		DNDPt29m	98.0897	6.56002
EX_10fthf5glu(e)	100		EX_10fthf(e)	100	0		DNDPt17m	99.976	0.315016		ECOAH1x	96.0514	9.33213		DNDPt33m	98.0897	6.56002
EX_10fthf6glu(e)	100		EX_10fthf5glu(e)	100	0		DNDPt22m	99.976	0.315016		ECOAH9m	96.0514	9.33213		DNDPt34m	98.0897	6.56002
EX_10fthf7glu(e)	100		EX_10fthf6glu(e)	100	0		DNDPt23m	99.976	0.315016		EGMESTr	96.0514	9.33213		DNDPt35m	98.0897	6.56002
EX_11-cis-retfa(e)	100		EX_10fthf7glu(e)	100	0		DNDPt24m	99.976	0.315016		EHGLAT	96.0514	9.33213		DNDPt36m	98.0897	6.56002
EX_13-cis-retnglc(e)	100		EX_11-cis-retfa(e)	100	0		DNDPt25m	99.976	0.315016		EHGLAT2m	96.0514	9.33213		DNDPt37m	98.0897	6.56002
EX_1glyc_hs(e)	100		EX_13-cis-retnglc(e)	100	0		DNDPt26m	99.976	0.315016		EHGLATm	96.0514	9.33213		DNDPt38m	98.0897	6.56002
EX_1mncam(e)	100		EX_1glyc_hs(e)	100	0		DNDPt27m	99.976	0.315016		EICOSTETCPT1	96.0514	9.33213		DNDPt39m	98.0897	6.56002
EX_2425dhvitd2(e)	100		EX_1mncam(e)	100	0		DNDPt28m	99.976	0.315016		EICOSTETCPT2	96.0514	9.33213		DNDPt3m	98.0897	6.56002
EX_2425dhvitd3(e)	100		EX_2425dhvitd2(e)	100	0		DNDPt29m	99.976	0.315016		EICOSTETCRNt	96.0514	9.33213		DNDPt40m	98.0897	6.56002
EX_24nph(e)	100		EX_2425dhvitd3(e)	100	0		DNDPt33m	99.976	0.315016		EICOSTETt	96.0514	9.33213		DNDPt41m	98.0897	6.56002
EX_25hvitd2(e)	100		EX_24nph(e)	100	0		DNDPt34m	99.976	0.315016		ELAIDCPT1	96.0514	9.33213		DNDPt46m	98.0897	6.56002
EX_25hvitd3(e)	100		EX_25hvitd2(e)	100	0		DNDPt35m	99.976	0.315016		ELAIDCPT2	96.0514	9.33213		DNDPt47m	98.0897	6.56002
EX_35cgmp(e)	100		EX_25hvitd3(e)	100	0		DNDPt36m	99.976	0.315016		ELAIDCRNt	96.0514	9.33213		DNDPt48m	98.0897	6.56002
EX_3aib(e)	100		EX_35cgmp(e)	100	0		DNDPt37m	99.976	0.315016		ELAIDt	96.0514	9.33213		DNDPt49m	98.0897	6.56002
EX_3mlda(e)	100		EX_3aib(e)	100	0		DNDPt38m	99.976	0.315016		ENGASE	96.0514	9.33213		DNDPt4m	98.0897	6.56002
EX_4abut(e)	100		EX_3mlda(e)	100	0		DNDPt39m	99.976	0.315016		ENGASE2	96.0514	9.33213		DNDPt50m	98.0897	6.56002
EX_4hdebrisoquine(e)	100		EX_4abut(e)	100	0		DNDPt3m	99.976	0.315016		ENGASE2ly	96.0514	9.33213		DNDPt51m	98.0897	6.56002
EX_4hphac(e)	100		EX_4hdebrisoquine(e)	100	0		DNDPt40m	99.976	0.315016		ENMAN1g	96.0514	9.33213		DNDPt52m	98.0897	6.56002
EX_4mptnl(e)	100		EX_4hphac(e)	100	0		DNDPt41m	99.976	0.315016		ENMAN2g	96.0514	9.33213		DNDPt53m	98.0897	6.56002
EX_4nph(e)	100		EX_4mptnl(e)	100	0		DNDPt46m	99.976	0.315016		ENMAN3g	96.0514	9.33213		DNDPt54m	98.0897	6.56002
EX_4nphsf(e)	100		EX_4nph(e)	100	0		DNDPt47m	99.976	0.315016		ENMAN4g	96.0514	9.33213		DNDPt59m	98.0897	6.56002
EX_4pyrdx(e)	100		EX_4nphsf(e)	100	0		DNDPt48m	99.976	0.315016		ENMAN5g	96.0514	9.33213		DNDPt5m	98.0897	6.56002
EX_5adtststerone(e)	100		EX_4pyrdx(e)	100	0		DNDPt49m	99.976	0.315016		ENMAN6g	96.0514	9.33213		DNDPt60m	98.0897	6.56002
EX_5adtststeroneglc(e)	100		EX_5adtststerone(e)	100	0		DNDPt4m	99.976	0.315016		ENO	96.0514	9.33213		DNDPt61m	98.0897	6.56002
EX_5dhf(e)	100		EX_5adtststeroneglc(e)	100	0		DNDPt50m	99.976	0.315016		ESTRADIOLGLCt	96.0514	9.33213		DNDPt62m	98.0897	6.56002
EX_5fthf(e)	100		EX_5dhf(e)	100	0		DNDPt51m	99.976	0.315016		ESTRADIOLGLCt2	96.0514	9.33213		DNDPt63m	98.0897	6.56002
EX_5mthf(e)	100		EX_5fthf(e)	100	0		DNDPt52m	99.976	0.315016		ESTRADIOLGLCtr	96.0514	9.33213		DNDPt6m	98.0897	6.56002
EX_5thf(e)	100		EX_5mthf(e)	100	0		DNDPt53m	99.976	0.315016		ESTRADIOLt	96.0514	9.33213		DNDPt7m	98.0897	6.56002
EX_6dhf(e)	100		EX_5thf(e)	100	0		DNDPt54m	99.976	0.315016		ESTRADIOLtr	96.0514	9.33213		DNDPt8m	98.0897	6.56002
EX_6htststerone(e)	100		EX_6dhf(e)	100	0		DNDPt59m	99.976	0.315016		ESTRIOLGLCte	96.0514	9.33213		DNDPt9m	98.0897	6.56002
EX_6thf(e)	100		EX_6htststerone(e)	100	0		DNDPt5m	99.976	0.315016		ESTRIOLGLCtr	96.0514	9.33213		DOGULND1	98.0897	6.56002
EX_7dhf(e)	100		EX_6thf(e)	100	0		DNDPt60m	99.976	0.315016		ESTRONEGLCt	96.0514	9.33213		DOGULND2	98.0897	6.56002
EX_7thf(e)	100		EX_7dhf(e)	100	0		DNDPt61m	99.976	0.315016		ESTRONEGLCtr	96.0514	9.33213		DOGULNO1	98.0897	6.56002
EX_9-cis-retfa(e)	100		EX_7thf(e)	100	0		DNDPt62m	99.976	0.315016		ESTRONESt	96.0514	9.33213		DOGULNO2	98.0897	6.56002
EX_abt(e)	100		EX_9-cis-retfa(e)	100	0		DNDPt63m	99.976	0.315016		ESTRONESt2	96.0514	9.33213		DOLASNT_Ler	98.0897	6.56002
EX_ac(e)	100		EX_abt(e)	100	0		DNDPt6m	99.976	0.315016		ESTRONEtr	96.0514	9.33213		DOLASNT_Uer	98.0897	6.56002
EX_acac(e)	100		EX_ac(e)	100	0		DNDPt7m	99.976	0.315016		ESTSULT	96.0514	9.33213		DOLDPP_Ler	98.0897	6.56002
EX_acald(e)	100		EX_acac(e)	100	0		DNDPt8m	99.976	0.315016		ETF	96.0514	9.33213		DOLDPP_Uer	98.0897	6.56002
EX_acetone(e)	100		EX_acald(e)	100	0		DNDPt9m	99.976	0.315016		ETFQO	96.0514	9.33213		DOLGLCP_Lter	98.0897	6.56002
EX_acgalfucgalacgalfuc12gal14acglcgalgluside_hs(e)	100		EX_acetone(e)	100	0		DOGULND1	99.976	0.315016		ETHAK	96.0514	9.33213		DOLGLCP_Uter	98.0897	6.56002
EX_acgalfucgalacgalfucgalacglcgal14acglcgalgluside_hs(e)	100		EX_acgalfucgalacgalfuc12gal14acglcgalgluside_hs(e)	100	0		DOGULND2	99.976	0.315016		ETHP	96.0514	9.33213		DOLGPP_Ler	98.0897	6.56002
EX_acgam(e)	100		EX_acgalfucgalacgalfucgalacglcgal14acglcgalgluside_hs(e)	100	0		DOGULNO1	99.976	0.315016		ETOHMO	96.0514	9.33213		DOLGPP_Uer	98.0897	6.56002
EX_ach(e)	100		EX_acgam(e)	100	0		DOGULNO2	99.976	0.315016		ETOHt	96.0514	9.33213		DOLICHOL_Lter	98.0897	6.56002
EX_acn13acngalgbside_hs(e)	100		EX_ach(e)	100	0		DOLASNT_Ler	99.976	0.315016		ETOHtx	96.0514	9.33213		DOLICHOL_Uter	98.0897	6.56002
EX_acn23acngalgbside_hs(e)	100		EX_acn13acngalgbside_hs(e)	100	0		DOLASNT_Uer	99.976	0.315016		EX_10fthf(e)	96.0514	9.33213		DOLK_L	98.0897	6.56002
EX_acnacngal14acglcgalgluside_hs(e)	100		EX_acn23acngalgbside_hs(e)	100	0		DOLDPP_Ler	99.976	0.315016		EX_10fthf5glu(e)	96.0514	9.33213		DOLK_U	98.0897	6.56002
EX_acnacngalgbside_hs(e)	100		EX_acnacngal14acglcgalgluside_hs(e)	100	0		DOLDPP_Uer	99.976	0.315016		EX_10fthf6glu(e)	96.0514	9.33213		DOLMANP_Lter	98.0897	6.56002
EX_acngalacglcgal14acglcgalgluside_hs(e)	100		EX_acnacngalgbside_hs(e)	100	0		DOLGLCP_Lter	99.976	0.315016		EX_10fthf7glu(e)	96.0514	9.33213		DOLMANP_Uter	98.0897	6.56002
EX_ade(e)	100		EX_acngalacglcgal14acglcgalgluside_hs(e)	100	0		DOLGLCP_Uter	99.976	0.315016		EX_11-cis-retfa(e)	96.0514	9.33213		DOLP_Lter	98.0897	6.56002
EX_adn(e)	100		EX_ade(e)	100	0		DOLGPP_Ler	99.976	0.315016		EX_1glyc_hs(e)	96.0514	9.33213		DOLP_Uter	98.0897	6.56002
EX_adp	100		EX_adn(e)	100	0		DOLGPP_Uer	99.976	0.315016		EX_1mncam(e)	96.0514	9.33213		DOLPGT1_Ler	98.0897	6.56002
EX_adprbp(e)	100		EX_adp	100	0		DOLICHOL_Lter	99.976	0.315016		EX_2425dhvitd2(e)	96.0514	9.33213		DOLPGT1_Uer	98.0897	6.56002
EX_adprib(e)	100		EX_adprbp(e)	100	0		DOLICHOL_Uter	99.976	0.315016		EX_2425dhvitd3(e)	96.0514	9.33213		DOLPGT2_Ler	98.0897	6.56002
EX_adrn(e)	100		EX_adprib(e)	100	0		DOLK_L	99.976	0.315016		EX_24nph(e)	96.0514	9.33213		DOLPGT2_Uer	98.0897	6.56002
EX_adrnl(e)	100		EX_adrn(e)	100	0		DOLK_U	99.976	0.315016		EX_25hvitd2(e)	96.0514	9.33213		DOLPGT3_Ler	98.0897	6.56002
EX_aflatoxin(e)	100		EX_adrnl(e)	100	0		DOLMANP_Lter	99.976	0.315016		EX_25hvitd3(e)	96.0514	9.33213		DOLPGT3_Uer	98.0897	6.56002
EX_ahandrostanglc(e)	100		EX_aflatoxin(e)	100	0		DOLMANP_Uter	99.976	0.315016		EX_35cgmp(e)	96.0514	9.33213		DOLPH_Ler	98.0897	6.56002
EX_ak2lgchol_hs(e)	100		EX_ahandrostanglc(e)	100	0		DOLP_Lter	99.976	0.315016		EX_4abut(e)	96.0514	9.33213		DOLPH_Uer	98.0897	6.56002
EX_akg(e)	100		EX_ak2lgchol_hs(e)	100	0		DOLP_Uter	99.976	0.315016		EX_4hdebrisoquine(e)	96.0514	9.33213		DOLPMT_L	98.0897	6.56002
EX_ala-B(e)	100		EX_akg(e)	100	0		DOLPGT1_Ler	99.976	0.315016		EX_4hphac(e)	96.0514	9.33213		DOLPMT_U	98.0897	6.56002
EX_ala-D(e)	100		EX_ala-B(e)	100	0		DOLPGT1_Uer	99.976	0.315016		EX_4mptnl(e)	96.0514	9.33213		DOLPMT1_Ler	98.0897	6.56002
EX_ala-L(e)	100		EX_ala-D(e)	100	0		DOLPGT2_Ler	99.976	0.315016		EX_4nph(e)	96.0514	9.33213		DOLPMT1_Uer	98.0897	6.56002
EX_aldstrn(e)	100		EX_ala-L(e)	100	0		DOLPGT2_Uer	99.976	0.315016		EX_4nphsf(e)	96.0514	9.33213		DOLPMT2_Ler	98.0897	6.56002
EX_amp(e)	100		EX_aldstrn(e)	100	0		DOLPGT3_Ler	99.976	0.315016		EX_4pyrdx(e)	96.0514	9.33213		DOLPMT2_Uer	98.0897	6.56002
EX_andrstrn(e)	100		EX_amp(e)	100	0		DOLPGT3_Uer	99.976	0.315016		EX_5adtststerone(e)	96.0514	9.33213		DOLPMT3_Ler	98.0897	6.56002
EX_andrstrnglc(e)	100		EX_andrstrn(e)	100	0		DOLPH_Ler	99.976	0.315016		EX_5adtststeroneglc(e)	96.0514	9.33213		DOLPMT3_Uer	98.0897	6.56002
EX_aqcobal(e)	100		EX_andrstrnglc(e)	100	0		DOLPH_Uer	99.976	0.315016		EX_5dhf(e)	96.0514	9.33213		DOLPMT4_Ler	98.0897	6.56002
EX_arab-L(e)	100		EX_aqcobal(e)	100	0		DOLPMT_L	99.976	0.315016		EX_5fthf(e)	96.0514	9.33213		DOLPMT4_Uer	98.0897	6.56002
EX_arach(e)	100		EX_arab-L(e)	100	0		DOLPMT_U	99.976	0.315016		EX_5mthf(e)	96.0514	9.33213		DOPABMO	98.0897	6.56002
EX_arachd(e)	100		EX_arach(e)	100	0		DOLPMT1_Ler	99.976	0.315016		EX_5thf(e)	96.0514	9.33213		DOPAMT	98.0897	6.56002
EX_arg-L(e)	100		EX_arachd(e)	100	0		DOLPMT1_Uer	99.976	0.315016		EX_6dhf(e)	96.0514	9.33213		DOPASFt	98.0897	6.56002
EX_ascb-L(e)	100		EX_arg-L(e)	100	0		DOLPMT2_Ler	99.976	0.315016		EX_6htststerone(e)	96.0514	9.33213		DOPASULT	98.0897	6.56002
EX_asn-L(e)	100		EX_ascb-L(e)	100	0		DOLPMT2_Uer	99.976	0.315016		EX_6thf(e)	96.0514	9.33213		DOPAt4(2)r	98.0897	6.56002
EX_asp-D(e)	100		EX_asn-L(e)	100	0		DOLPMT3_Ler	99.976	0.315016		EX_7dhf(e)	96.0514	9.33213		DOPAtu	98.0897	6.56002
EX_asp-L(e)	100		EX_asp-D(e)	100	0		DOLPMT3_Uer	99.976	0.315016		EX_7thf(e)	96.0514	9.33213		DOPAVESSEC	98.0897	6.56002
EX_atp(e)	100		EX_asp-L(e)	100	0		DOLPMT4_Ler	99.976	0.315016		EX_9-cis-retfa(e)	96.0514	9.33213		DPCOAK	98.0897	6.56002
EX_avite1(e)	100		EX_atp(e)	100	0		DOLPMT4_Uer	99.976	0.315016		EX_abt(e)	96.0514	9.33213		DPCOAPP	98.0897	6.56002
EX_avite2(e)	100		EX_avite1(e)	100	0		DOPABMO	99.976	0.315016		EX_ac(e)	96.0514	9.33213		DPCOAtl	98.0897	6.56002
EX_bhb(e)	100		EX_avite2(e)	100	0		DOPAMT	99.976	0.315016		EX_acac(e)	96.0514	9.33213		DPHMBDCm	98.0897	6.56002
EX_bildglcur(e)	100		EX_bhb(e)	100	0		DOPASFt	99.976	0.315016		EX_acald(e)	96.0514	9.33213		DPMVDx	98.0897	6.56002
EX_bilglcur(e)	100		EX_bildglcur(e)	100	0		DOPASULT	99.976	0.315016		EX_acetone(e)	96.0514	9.33213		DRIBt	98.0897	6.56002
EX_bilirub(e)	100		EX_bilglcur(e)	100	0		DOPAt4(2)r	99.976	0.315016		EX_acgalfucgalacgalfuc12gal14acglcgalgluside_hs(e)	96.0514	9.33213		DRPA	98.0897	6.56002
EX_biocyt(e)	100		EX_bilirub(e)	100	0		DOPAtu	99.976	0.315016		EX_acgalfucgalacgalfucgalacglcgal14acglcgalgluside_hs(e)	96.0514	9.33213		DTDPtn	98.0897	6.56002
EX_btn(e)	100		EX_biocyt(e)	100	0		DOPAVESSEC	99.976	0.315016		EX_acgam(e)	96.0514	9.33213		DTTPtn	98.0897	6.56002
EX_but(e)	100		EX_btn(e)	100	0		DPCOAK	99.976	0.315016		EX_ach(e)	96.0514	9.33213		DUDPtn	98.0897	6.56002
EX_bvite(e)	100		EX_but(e)	100	0		DPCOAPP	99.976	0.315016		EX_acn13acngalgbside_hs(e)	96.0514	9.33213		DUMPtn	98.0897	6.56002
EX_bz(e)	100		EX_bvite(e)	100	0		DPCOAtl	99.976	0.315016		EX_acn23acngalgbside_hs(e)	96.0514	9.33213		DURAD	98.0897	6.56002
EX_ca2(e)	100		EX_bz(e)	100	0		DPHMBDCm	99.976	0.315016		EX_acnacngal14acglcgalgluside_hs(e)	96.0514	9.33213		DURAD2	98.0897	6.56002
EX_camp(e)	100		EX_ca2(e)	100	0		DPMVDx	99.976	0.315016		EX_acnacngalgbside_hs(e)	96.0514	9.33213		DURIK1	98.0897	6.56002
EX_cca_d3(e)	100		EX_camp(e)	100	0		DRIBt	99.976	0.315016		EX_acngalacglcgal14acglcgalgluside_hs(e)	96.0514	9.33213		DURIK1m	98.0897	6.56002
EX_chol(e)	100		EX_cca_d3(e)	100	0		DRPA	99.976	0.315016		EX_ade(e)	96.0514	9.33213		DURItn	98.0897	6.56002
EX_cholate(e)	100		EX_chol(e)	100	0		DTDPtn	99.976	0.315016		EX_adn(e)	96.0514	9.33213		DUTPDPm	98.0897	6.56002
EX_chsterol(e)	100		EX_cholate(e)	100	0		DTTPtn	99.976	0.315016		EX_adp	96.0514	9.33213		DUTPDPn	98.0897	6.56002
EX_chtn(e)	100		EX_chsterol(e)	100	0		DUDPtn	99.976	0.315016		EX_adprbp(e)	96.0514	9.33213		EAFLATOXINte	98.0897	6.56002
EX_cit(e)	100		EX_chtn(e)	100	0		DUMPtn	99.976	0.315016		EX_adprib(e)	96.0514	9.33213		EBASTINEOHte	98.0897	6.56002
EX_cl(e)	100		EX_cit(e)	100	0		DURAD	99.976	0.315016		EX_adrn(e)	96.0514	9.33213		EBASTINEte	98.0897	6.56002
EX_CLPND(e)	100		EX_cl(e)	100	0		DURAD2	99.976	0.315016		EX_adrnl(e)	96.0514	9.33213		EBP1r	98.0897	6.56002
EX_cmp(e)	100		EX_CLPND(e)	100	0		DURIK1	99.976	0.315016		EX_aflatoxin(e)	96.0514	9.33213		EBP2r	98.0897	6.56002
EX_co(e)	100		EX_cmp(e)	100	0		DURIK1m	99.976	0.315016		EX_ahandrostanglc(e)	96.0514	9.33213		ECOAH1m	98.0897	6.56002
EX_co2(e)	100		EX_co(e)	100	0		DURItn	99.976	0.315016		EX_ak2lgchol_hs(e)	96.0514	9.33213		ECOAH1x	98.0897	6.56002
EX_coumarin(e)	100		EX_co2(e)	100	0		DUTPDPm	99.976	0.315016		EX_akg(e)	96.0514	9.33213		ECOAH9m	98.0897	6.56002
EX_creat(e)	100		EX_coumarin(e)	100	0		DUTPDPn	99.976	0.315016		EX_ala-B(e)	96.0514	9.33213		EGMESTr	98.0897	6.56002
EX_crmp_hs(e)	100		EX_creat(e)	100	0		EAFLATOXINte	99.976	0.315016		EX_ala-D(e)	96.0514	9.33213		EHGLAT	98.0897	6.56002
EX_crn(e)	100		EX_crmp_hs(e)	100	0		EBASTINEOHte	99.976	0.315016		EX_ala-L(e)	96.0514	9.33213		EHGLAT2m	98.0897	6.56002
EX_crtsl(e)	100		EX_crn(e)	100	0		EBASTINEte	99.976	0.315016		EX_aldstrn(e)	96.0514	9.33213		EHGLATm	98.0897	6.56002
EX_crtstrn(e)	100		EX_crtsl(e)	100	0		EBP1r	99.976	0.315016		EX_amp(e)	96.0514	9.33213		EICOSTETCPT1	98.0897	6.56002
EX_crvnc(e)	100		EX_crtstrn(e)	100	0		EBP2r	99.976	0.315016		EX_andrstrn(e)	96.0514	9.33213		EICOSTETCPT2	98.0897	6.56002
EX_csn(e)	100		EX_crvnc(e)	100	0		ECOAH1m	99.976	0.315016		EX_andrstrnglc(e)	96.0514	9.33213		EICOSTETCRNt	98.0897	6.56002
EX_cspg_a(e)	100		EX_csn(e)	100	0		ECOAH1x	99.976	0.315016		EX_aqcobal(e)	96.0514	9.33213		EICOSTETt	98.0897	6.56002
EX_cspg_b(e)	100		EX_cspg_a(e)	100	0		ECOAH9m	99.976	0.315016		EX_arab-L(e)	96.0514	9.33213		ELAIDCPT1	98.0897	6.56002
EX_cspg_c(e)	100		EX_cspg_b(e)	100	0		EGMESTr	99.976	0.315016		EX_arach(e)	96.0514	9.33213		ELAIDCPT2	98.0897	6.56002
EX_cspg_d(e)	100		EX_cspg_c(e)	100	0		EHGLAT	99.976	0.315016		EX_arachd(e)	96.0514	9.33213		ELAIDCRNt	98.0897	6.56002
EX_cspg_e(e)	100		EX_cspg_d(e)	100	0		EHGLAT2m	99.976	0.315016		EX_arg-L(e)	96.0514	9.33213		ELAIDt	98.0897	6.56002
EX_cyan(e)	100		EX_cspg_e(e)	100	0		EHGLATm	99.976	0.315016		EX_ascb-L(e)	96.0514	9.33213		ENGASE	98.0897	6.56002
EX_cytd(e)	100		EX_cyan(e)	100	0		EICOSTETCPT1	99.976	0.315016		EX_asn-L(e)	96.0514	9.33213		ENGASE2	98.0897	6.56002
EX_dad-2(e)	100		EX_cytd(e)	100	0		EICOSTETCPT2	99.976	0.315016		EX_asp-D(e)	96.0514	9.33213		ENGASE2ly	98.0897	6.56002
EX_dag_hs(e)	100		EX_dad-2(e)	100	0		EICOSTETCRNt	99.976	0.315016		EX_asp-L(e)	96.0514	9.33213		ENMAN1g	98.0897	6.56002
EX_dcsptn1(e)	100		EX_dag_hs(e)	100	0		EICOSTETt	99.976	0.315016		EX_atp(e)	96.0514	9.33213		ENMAN2g	98.0897	6.56002
EX_dcyt(e)	100		EX_dcsptn1(e)	100	0		ELAIDCPT1	99.976	0.315016		EX_avite1(e)	96.0514	9.33213		ENMAN3g	98.0897	6.56002
EX_debrisoquine(e)	100		EX_dcyt(e)	100	0		ELAIDCPT2	99.976	0.315016		EX_avite2(e)	96.0514	9.33213		ENMAN4g	98.0897	6.56002
EX_dgchol(e)	100		EX_debrisoquine(e)	100	0		ELAIDCRNt	99.976	0.315016		EX_bhb(e)	96.0514	9.33213		ENMAN5g	98.0897	6.56002
EX_dgsn(e)	100		EX_dgchol(e)	100	0		ELAIDt	99.976	0.315016		EX_bildglcur(e)	96.0514	9.33213		ENMAN6g	98.0897	6.56002
EX_dhdascb(e)	100		EX_dgsn(e)	100	0		ENGASE	99.976	0.315016		EX_bilglcur(e)	96.0514	9.33213		ENO	98.0897	6.56002
EX_dheas(e)	100		EX_dhdascb(e)	100	0		ENGASE2	99.976	0.315016		EX_bilirub(e)	96.0514	9.33213		ESTRADIOLGLCt	98.0897	6.56002
EX_dhf(e)	100		EX_dheas(e)	100	0		ENGASE2ly	99.976	0.315016		EX_biocyt(e)	96.0514	9.33213		ESTRADIOLGLCt2	98.0897	6.56002
EX_digalsgalside_hs(e)	100		EX_dhf(e)	100	0		ENMAN1g	99.976	0.315016		EX_btn(e)	96.0514	9.33213		ESTRADIOLGLCtr	98.0897	6.56002
EX_din(e)	100		EX_digalsgalside_hs(e)	100	0		ENMAN2g	99.976	0.315016		EX_but(e)	96.0514	9.33213		ESTRADIOLt	98.0897	6.56002
EX_dlnlcg(e)	100		EX_din(e)	100	0		ENMAN3g	99.976	0.315016		EX_bvite(e)	96.0514	9.33213		ESTRADIOLtr	98.0897	6.56002
EX_dmhptcrn(e)	100		EX_dlnlcg(e)	100	0		ENMAN4g	99.976	0.315016		EX_bz(e)	96.0514	9.33213		ESTRIOLGLCte	98.0897	6.56002
EX_dopa(e)	100		EX_dmhptcrn(e)	100	0		ENMAN5g	99.976	0.315016		EX_ca2(e)	96.0514	9.33213		ESTRIOLGLCtr	98.0897	6.56002
EX_dopasf(e)	100		EX_dopa(e)	100	0		ENMAN6g	99.976	0.315016		EX_camp(e)	96.0514	9.33213		ESTRONEGLCt	98.0897	6.56002
EX_drib(e)	100		EX_dopasf(e)	100	0		ENO	99.976	0.315016		EX_cca_d3(e)	96.0514	9.33213		ESTRONEGLCtr	98.0897	6.56002
EX_duri(e)	100		EX_drib(e)	100	0		ESTRADIOLGLCt	99.976	0.315016		EX_chol(e)	96.0514	9.33213		ESTRONESt	98.0897	6.56002
EX_eaflatoxin(e)	100		EX_duri(e)	100	0		ESTRADIOLGLCt2	99.976	0.315016		EX_cholate(e)	96.0514	9.33213		ESTRONESt2	98.0897	6.56002
EX_ebastine(e)	100		EX_eaflatoxin(e)	100	0		ESTRADIOLGLCtr	99.976	0.315016		EX_chsterol(e)	96.0514	9.33213		ESTRONEtr	98.0897	6.56002
EX_ebastineoh(e)	100		EX_ebastine(e)	100	0		ESTRADIOLt	99.976	0.315016		EX_chtn(e)	96.0514	9.33213		ESTSULT	98.0897	6.56002
EX_eicostet(e)	100		EX_ebastineoh(e)	100	0		ESTRADIOLtr	99.976	0.315016		EX_cit(e)	96.0514	9.33213		ETHAK	98.0897	6.56002
EX_elaid(e)	100		EX_eicostet(e)	100	0		ESTRIOLGLCte	99.976	0.315016		EX_cl(e)	96.0514	9.33213		ETHP	98.0897	6.56002
EX_estradiol(e)	100		EX_elaid(e)	100	0		ESTRIOLGLCtr	99.976	0.315016		EX_CLPND(e)	96.0514	9.33213		ETOHMO	98.0897	6.56002
EX_estradiolglc(e)	100		EX_estradiol(e)	100	0		ESTRONESt	99.976	0.315016		EX_cmp(e)	96.0514	9.33213		ETOHt	98.0897	6.56002
EX_estriolglc(e)	100		EX_estradiolglc(e)	100	0		ESTRONESt2	99.976	0.315016		EX_co(e)	96.0514	9.33213		ETOHtx	98.0897	6.56002
EX_estroneglc(e)	100		EX_estriolglc(e)	100	0		ESTRONEtr	99.976	0.315016		EX_co2(e)	96.0514	9.33213		EX_10fthf(e)	98.0897	6.56002
EX_estrones(e)	100		EX_estroneglc(e)	100	0		ESTSULT	99.976	0.315016		EX_coumarin(e)	96.0514	9.33213		EX_10fthf5glu(e)	98.0897	6.56002
EX_etoh(e)	100		EX_estrones(e)	100	0		ETHAK	99.976	0.315016		EX_creat(e)	96.0514	9.33213		EX_10fthf6glu(e)	98.0897	6.56002
EX_fe2(e)	100		EX_etoh(e)	100	0		ETHP	99.976	0.315016		EX_crmp_hs(e)	96.0514	9.33213		EX_10fthf7glu(e)	98.0897	6.56002
EX_fol(e)	100		EX_fe2(e)	100	0		ETOHMO	99.976	0.315016		EX_crn(e)	96.0514	9.33213		EX_11-cis-retfa(e)	98.0897	6.56002
EX_for(e)	100		EX_fol(e)	100	0		ETOHt	99.976	0.315016		EX_crtsl(e)	96.0514	9.33213		EX_13-cis-retnglc(e)	98.0897	6.56002
EX_fru(e)	100		EX_for(e)	100	0		ETOHtx	99.976	0.315016		EX_crtstrn(e)	96.0514	9.33213		EX_1glyc_hs(e)	98.0897	6.56002
EX_fuc-L(e)	100		EX_fru(e)	100	0		EX_10fthf(e)	99.976	0.315016		EX_crvnc(e)	96.0514	9.33213		EX_1mncam(e)	98.0897	6.56002
EX_fuc13galacglcgal14acglcgalgluside_hs(e)	100		EX_fuc-L(e)	100	0		EX_10fthf5glu(e)	99.976	0.315016		EX_csn(e)	96.0514	9.33213		EX_2425dhvitd2(e)	98.0897	6.56002
EX_fuc14galacglcgalgluside_hs(e)	100		EX_fuc13galacglcgal14acglcgalgluside_hs(e)	100	0		EX_10fthf6glu(e)	99.976	0.315016		EX_cspg_a(e)	96.0514	9.33213		EX_2425dhvitd3(e)	98.0897	6.56002
EX_fucacgalfucgalacglcgalgluside_hs(e)	100		EX_fuc14galacglcgalgluside_hs(e)	100	0		EX_10fthf7glu(e)	99.976	0.315016		EX_cspg_b(e)	96.0514	9.33213		EX_24nph(e)	98.0897	6.56002
EX_fucacngal14acglcgalgluside_hs(e)	100		EX_fucacgalfucgalacglcgalgluside_hs(e)	100	0		EX_11-cis-retfa(e)	99.976	0.315016		EX_cspg_c(e)	96.0514	9.33213		EX_25hvitd2(e)	98.0897	6.56002
EX_fucacngalacglcgalgluside_hs(e)	100		EX_fucacngal14acglcgalgluside_hs(e)	100	0		EX_13-cis-retnglc(e)	99.976	0.315016		EX_cspg_d(e)	96.0514	9.33213		EX_25hvitd3(e)	98.0897	6.56002
EX_fucfuc12gal14acglcgalgluside_hs(e)	100		EX_fucacngalacglcgalgluside_hs(e)	100	0		EX_1glyc_hs(e)	99.976	0.315016		EX_cspg_e(e)	96.0514	9.33213		EX_4hdebrisoquine(e)	98.0897	6.56002
EX_fucfuc132galacglcgal14acglcgalgluside_hs(e)	100		EX_fucfuc12gal14acglcgalgluside_hs(e)	100	0		EX_1mncam(e)	99.976	0.315016		EX_cyan(e)	96.0514	9.33213		EX_4hphac(e)	98.0897	6.56002
EX_fucfucfucgalacglc13galacglcgal14acglcgalgluside_hs(e)	100		EX_fucfuc132galacglcgal14acglcgalgluside_hs(e)	100	0		EX_2425dhvitd2(e)	99.976	0.315016		EX_cytd(e)	96.0514	9.33213		EX_4mptnl(e)	98.0897	6.56002
EX_fucfucfucgalacglcgal14acglcgalgluside_hs(e)	100		EX_fucfucfucgalacglc13galacglcgal14acglcgalgluside_hs(e)	100	0		EX_2425dhvitd3(e)	99.976	0.315016		EX_dad-2(e)	96.0514	9.33213		EX_4nph(e)	98.0897	6.56002
EX_fucfucgalacglcgalgluside_hs(e)	100		EX_fucfucfucgalacglcgal14acglcgalgluside_hs(e)	100	0		EX_24nph(e)	99.976	0.315016		EX_dag_hs(e)	96.0514	9.33213		EX_4nphsf(e)	98.0897	6.56002
EX_fucgal14acglcgalgluside_hs(e)	100		EX_fucfucgalacglcgalgluside_hs(e)	100	0		EX_25hvitd2(e)	99.976	0.315016		EX_dcsptn1(e)	96.0514	9.33213		EX_4pyrdx(e)	98.0897	6.56002
EX_fucgalfucgalacglcgalgluside_hs(e)	100		EX_fucgal14acglcgalgluside_hs(e)	100	0		EX_25hvitd3(e)	99.976	0.315016		EX_dcyt(e)	96.0514	9.33213		EX_5adtststerone(e)	98.0897	6.56002
EX_fucgalgbside_hs(e)	100		EX_fucgalfucgalacglcgalgluside_hs(e)	100	0		EX_4hdebrisoquine(e)	99.976	0.315016		EX_debrisoquine(e)	96.0514	9.33213		EX_5adtststeroneglc(e)	98.0897	6.56002
EX_gal(e)	100		EX_fucgalgbside_hs(e)	100	0		EX_4mptnl(e)	99.976	0.315016		EX_dgchol(e)	96.0514	9.33213		EX_5dhf(e)	98.0897	6.56002
EX_galacglcgalgbside_hs(e)	100		EX_gal(e)	100	0		EX_4nph(e)	99.976	0.315016		EX_dgsn(e)	96.0514	9.33213		EX_5fthf(e)	98.0897	6.56002
EX_galfuc12gal14acglcgalgluside_hs(e)	100		EX_galacglcgalgbside_hs(e)	100	0		EX_4nphsf(e)	99.976	0.315016		EX_dhdascb(e)	96.0514	9.33213		EX_5mthf(e)	98.0897	6.56002
EX_galfucgalacglcgal14acglcgalgluside_hs(e)	100		EX_galfuc12gal14acglcgalgluside_hs(e)	100	0		EX_4pyrdx(e)	99.976	0.315016		EX_dheas(e)	96.0514	9.33213		EX_5thf(e)	98.0897	6.56002
EX_galgalfucfucgalacglcgalacglcgal14acglcgalgluside_hs(e)	100		EX_galfucgalacglcgal14acglcgalgluside_hs(e)	100	0		EX_5adtststerone(e)	99.976	0.315016		EX_dhf(e)	96.0514	9.33213		EX_6dhf(e)	98.0897	6.56002
EX_galgalgalthcrm_hs(e)	100		EX_galgalfucfucgalacglcgalacglcgal14acglcgalgluside_hs(e)	100	0		EX_5adtststeroneglc(e)	99.976	0.315016		EX_digalsgalside_hs(e)	96.0514	9.33213		EX_6htststerone(e)	98.0897	6.56002
EX_gam(e)	100		EX_galgalgalthcrm_hs(e)	100	0		EX_5dhf(e)	99.976	0.315016		EX_din(e)	96.0514	9.33213		EX_6thf(e)	98.0897	6.56002
EX_gbside_hs(e)	100		EX_gam(e)	100	0		EX_5fthf(e)	99.976	0.315016		EX_dlnlcg(e)	96.0514	9.33213		EX_7dhf(e)	98.0897	6.56002
EX_gchola(e)	100		EX_gbside_hs(e)	100	0		EX_5mthf(e)	99.976	0.315016		EX_dmhptcrn(e)	96.0514	9.33213		EX_7thf(e)	98.0897	6.56002
EX_gd1b2_hs(e)	100		EX_gchola(e)	100	0		EX_5thf(e)	99.976	0.315016		EX_dopa(e)	96.0514	9.33213		EX_9-cis-retfa(e)	98.0897	6.56002
EX_gd1c_hs(e)	100		EX_gd1b2_hs(e)	100	0		EX_6dhf(e)	99.976	0.315016		EX_dopasf(e)	96.0514	9.33213		EX_abt(e)	98.0897	6.56002
EX_gdchola(e)	100		EX_gd1c_hs(e)	100	0		EX_6htststerone(e)	99.976	0.315016		EX_drib(e)	96.0514	9.33213		EX_ac(e)	98.0897	6.56002
EX_gdp(e)	100		EX_gdchola(e)	100	0		EX_6thf(e)	99.976	0.315016		EX_duri(e)	96.0514	9.33213		EX_acac(e)	98.0897	6.56002
EX_glc(e)	100		EX_gdp(e)	100	0		EX_7dhf(e)	99.976	0.315016		EX_eaflatoxin(e)	96.0514	9.33213		EX_acald(e)	98.0897	6.56002
EX_gln-L(e)	100		EX_glc(e)	100	0		EX_7thf(e)	99.976	0.315016		EX_ebastine(e)	96.0514	9.33213		EX_acetone(e)	98.0897	6.56002
EX_glu-L(e)	100		EX_gln-L(e)	100	0		EX_9-cis-retfa(e)	99.976	0.315016		EX_ebastineoh(e)	96.0514	9.33213		EX_acgalfucgalacgalfuc12gal14acglcgalgluside_hs(e)	98.0897	6.56002
EX_gluala(e)	100		EX_glu-L(e)	100	0		EX_abt(e)	99.976	0.315016		EX_eicostet(e)	96.0514	9.33213		EX_acgalfucgalacgalfucgalacglcgal14acglcgalgluside_hs(e)	98.0897	6.56002
EX_gly(e)	100		EX_gluala(e)	100	0		EX_ac(e)	99.976	0.315016		EX_elaid(e)	96.0514	9.33213		EX_acgam(e)	98.0897	6.56002
EX_glyb(e)	100		EX_gly(e)	100	0		EX_acac(e)	99.976	0.315016		EX_estradiol(e)	96.0514	9.33213		EX_ach(e)	98.0897	6.56002
EX_glyc-S(e)	100		EX_glyb(e)	100	0		EX_acald(e)	99.976	0.315016		EX_estradiolglc(e)	96.0514	9.33213		EX_acn13acngalgbside_hs(e)	98.0897	6.56002
EX_glyc(e)	100		EX_glyc-S(e)	100	0		EX_acetone(e)	99.976	0.315016		EX_estriolglc(e)	96.0514	9.33213		EX_acn23acngalgbside_hs(e)	98.0897	6.56002
EX_glygn2(e)	100		EX_glyc(e)	100	0		EX_acgalfucgalacgalfuc12gal14acglcgalgluside_hs(e)	99.976	0.315016		EX_estroneglc(e)	96.0514	9.33213		EX_acnacngal14acglcgalgluside_hs(e)	98.0897	6.56002
EX_glygn4(e)	100		EX_glygn2(e)	100	0		EX_acgalfucgalacgalfucgalacglcgal14acglcgalgluside_hs(e)	99.976	0.315016		EX_estrones(e)	96.0514	9.33213		EX_acnacngalgbside_hs(e)	98.0897	6.56002
EX_glygn5(e)	100		EX_glygn4(e)	100	0		EX_acgam(e)	99.976	0.315016		EX_etoh(e)	96.0514	9.33213		EX_acngalacglcgal14acglcgalgluside_hs(e)	98.0897	6.56002
EX_gmp(e)	100		EX_glygn5(e)	100	0		EX_ach(e)	99.976	0.315016		EX_fe2(e)	96.0514	9.33213		EX_adp	98.0897	6.56002
EX_gp1c_hs(e)	100		EX_gmp(e)	100	0		EX_acn13acngalgbside_hs(e)	99.976	0.315016		EX_fol(e)	96.0514	9.33213		EX_adprbp(e)	98.0897	6.56002
EX_gp1calpha_hs(e)	100		EX_gp1c_hs(e)	100	0		EX_acn23acngalgbside_hs(e)	99.976	0.315016		EX_for(e)	96.0514	9.33213		EX_adprib(e)	98.0897	6.56002
EX_gq1b_hs(e)	100		EX_gp1calpha_hs(e)	100	0		EX_acnacngal14acglcgalgluside_hs(e)	99.976	0.315016		EX_fru(e)	96.0514	9.33213		EX_adrn(e)	98.0897	6.56002
EX_gq1balpha_hs(e)	100		EX_gq1b_hs(e)	100	0		EX_acnacngalgbside_hs(e)	99.976	0.315016		EX_fuc-L(e)	96.0514	9.33213		EX_adrnl(e)	98.0897	6.56002
EX_gsn(e)	100		EX_gq1balpha_hs(e)	100	0		EX_acngalacglcgal14acglcgalgluside_hs(e)	99.976	0.315016		EX_fuc13galacglcgal14acglcgalgluside_hs(e)	96.0514	9.33213		EX_aflatoxin(e)	98.0897	6.56002
EX_gt1a_hs(e)	100		EX_gsn(e)	100	0		EX_adp	99.976	0.315016		EX_fuc14galacglcgalgluside_hs(e)	96.0514	9.33213		EX_ahandrostanglc(e)	98.0897	6.56002
EX_gthox(e)	100		EX_gt1a_hs(e)	100	0		EX_adprbp(e)	99.976	0.315016		EX_fucacgalfucgalacglcgalgluside_hs(e)	96.0514	9.33213		EX_ak2lgchol_hs(e)	98.0897	6.56002
EX_gthrd(e)	100		EX_gthox(e)	100	0		EX_adprib(e)	99.976	0.315016		EX_fucacngal14acglcgalgluside_hs(e)	96.0514	9.33213		EX_akg(e)	98.0897	6.56002
EX_gtp(e)	100		EX_gthrd(e)	100	0		EX_adrn(e)	99.976	0.315016		EX_fucacngalacglcgalgluside_hs(e)	96.0514	9.33213		EX_ala-B(e)	98.0897	6.56002
EX_gua(e)	100		EX_gtp(e)	100	0		EX_adrnl(e)	99.976	0.315016		EX_fucfuc12gal14acglcgalgluside_hs(e)	96.0514	9.33213		EX_aldstrn(e)	98.0897	6.56002
EX_h(e)	100		EX_gua(e)	100	0		EX_aflatoxin(e)	99.976	0.315016		EX_fucfuc132galacglcgal14acglcgalgluside_hs(e)	96.0514	9.33213		EX_amp(e)	98.0897	6.56002
EX_h2o(e)	100		EX_h(e)	100	0		EX_ahandrostanglc(e)	99.976	0.315016		EX_fucfucfucgalacglc13galacglcgal14acglcgalgluside_hs(e)	96.0514	9.33213		EX_andrstrn(e)	98.0897	6.56002
EX_h2o2(e)	100		EX_h2o(e)	100	0		EX_ak2lgchol_hs(e)	99.976	0.315016		EX_fucfucfucgalacglcgal14acglcgalgluside_hs(e)	96.0514	9.33213		EX_andrstrnglc(e)	98.0897	6.56002
EX_ha_pre1(e)	100		EX_h2o2(e)	100	0		EX_akg(e)	99.976	0.315016		EX_fucfucgalacglcgalgluside_hs(e)	96.0514	9.33213		EX_aqcobal(e)	98.0897	6.56002
EX_ha(e)	100		EX_ha_pre1(e)	100	0		EX_ala-B(e)	99.976	0.315016		EX_fucgal14acglcgalgluside_hs(e)	96.0514	9.33213		EX_arab-L(e)	98.0897	6.56002
EX_hco3(e)	100		EX_ha(e)	100	0		EX_aldstrn(e)	99.976	0.315016		EX_fucgalfucgalacglcgalgluside_hs(e)	96.0514	9.33213		EX_arach(e)	98.0897	6.56002
EX_hcoumarin(e)	100		EX_hco3(e)	100	0		EX_amp(e)	99.976	0.315016		EX_fucgalgbside_hs(e)	96.0514	9.33213		EX_arachd(e)	98.0897	6.56002
EX_hdca(e)	100		EX_hcoumarin(e)	100	0		EX_andrstrn(e)	99.976	0.315016		EX_gal(e)	96.0514	9.33213		EX_ascb-L(e)	98.0897	6.56002
EX_hdcea(e)	100		EX_hdca(e)	100	0		EX_andrstrnglc(e)	99.976	0.315016		EX_galacglcgalgbside_hs(e)	96.0514	9.33213		EX_asp-D(e)	98.0897	6.56002
EX_hestratriol(e)	100		EX_hdcea(e)	100	0		EX_aqcobal(e)	99.976	0.315016		EX_galfuc12gal14acglcgalgluside_hs(e)	96.0514	9.33213		EX_asp-L(e)	98.0897	6.56002
EX_hexc(e)	100		EX_hestratriol(e)	100	0		EX_arab-L(e)	99.976	0.315016		EX_galfucgalacglcgal14acglcgalgluside_hs(e)	96.0514	9.33213		EX_atp(e)	98.0897	6.56002
EX_his-L(e)	100		EX_hexc(e)	100	0		EX_arach(e)	99.976	0.315016		EX_galgalfucfucgalacglcgalacglcgal14acglcgalgluside_hs(e)	96.0514	9.33213		EX_avite1(e)	98.0897	6.56002
EX_hista(e)	100		EX_his-L(e)	100	0		EX_arachd(e)	99.976	0.315016		EX_galgalgalthcrm_hs(e)	96.0514	9.33213		EX_avite2(e)	98.0897	6.56002
EX_hom-L(e)	100		EX_hista(e)	100	0		EX_ascb-L(e)	99.976	0.315016		EX_gam(e)	96.0514	9.33213		EX_bhb(e)	98.0897	6.56002
EX_hpdca(e)	100		EX_hom-L(e)	100	0		EX_asp-D(e)	99.976	0.315016		EX_gbside_hs(e)	96.0514	9.33213		EX_bildglcur(e)	98.0897	6.56002
EX_hspg(e)	100		EX_hpdca(e)	100	0		EX_asp-L(e)	99.976	0.315016		EX_gchola(e)	96.0514	9.33213		EX_bilglcur(e)	98.0897	6.56002
EX_hxan(e)	100		EX_hspg(e)	100	0		EX_atp(e)	99.976	0.315016		EX_gd1b2_hs(e)	96.0514	9.33213		EX_bilirub(e)	98.0897	6.56002
EX_i(e)	100		EX_hxan(e)	100	0		EX_avite1(e)	99.976	0.315016		EX_gd1c_hs(e)	96.0514	9.33213		EX_biocyt(e)	98.0897	6.56002
EX_idp(e)	100		EX_i(e)	100	0		EX_avite2(e)	99.976	0.315016		EX_gdchola(e)	96.0514	9.33213		EX_btn(e)	98.0897	6.56002
EX_imp(e)	100		EX_idp(e)	100	0		EX_bhb(e)	99.976	0.315016		EX_gdp(e)	96.0514	9.33213		EX_but(e)	98.0897	6.56002
EX_inost(e)	100		EX_imp(e)	100	0		EX_bildglcur(e)	99.976	0.315016		EX_glc(e)	96.0514	9.33213		EX_bvite(e)	98.0897	6.56002
EX_ins(e)	100		EX_inost(e)	100	0		EX_bilglcur(e)	99.976	0.315016		EX_gln-L(e)	96.0514	9.33213		EX_bz(e)	98.0897	6.56002
EX_k(e)	100		EX_ins(e)	100	0		EX_bilirub(e)	99.976	0.315016		EX_glu-L(e)	96.0514	9.33213		EX_ca2(e)	98.0897	6.56002
EX_ksi_deg1(e)	100		EX_k(e)	100	0		EX_biocyt(e)	99.976	0.315016		EX_gluala(e)	96.0514	9.33213		EX_cca_d3(e)	98.0897	6.56002
EX_ksi(e)	100		EX_ksi_deg1(e)	100	0		EX_btn(e)	99.976	0.315016		EX_gly(e)	96.0514	9.33213		EX_cholate(e)	98.0897	6.56002
EX_ksii_core2(e)	100		EX_ksi(e)	100	0		EX_but(e)	99.976	0.315016		EX_glyb(e)	96.0514	9.33213		EX_chsterol(e)	98.0897	6.56002
EX_ksii_core4(e)	100		EX_ksii_core2(e)	100	0		EX_bvite(e)	99.976	0.315016		EX_glyc-S(e)	96.0514	9.33213		EX_chtn(e)	98.0897	6.56002
EX_lac-D(e)	100		EX_ksii_core4(e)	100	0		EX_bz(e)	99.976	0.315016		EX_glyc(e)	96.0514	9.33213		EX_cit(e)	98.0897	6.56002
EX_lac-L(e)	100		EX_lac-D(e)	100	0		EX_ca2(e)	99.976	0.315016		EX_glygn2(e)	96.0514	9.33213		EX_cl(e)	98.0897	6.56002
EX_lcts(e)	100		EX_lac-L(e)	100	0		EX_cca_d3(e)	99.976	0.315016		EX_glygn4(e)	96.0514	9.33213		EX_CLPND(e)	98.0897	6.56002
EX_Lcystin(e)	100		EX_lcts(e)	100	0		EX_cholate(e)	99.976	0.315016		EX_glygn5(e)	96.0514	9.33213		EX_cmp(e)	98.0897	6.56002
EX_leu-L(e)	100		EX_Lcystin(e)	100	0		EX_chsterol(e)	99.976	0.315016		EX_gmp(e)	96.0514	9.33213		EX_co(e)	98.0897	6.56002
EX_leuktrA4(e)	100		EX_leu-L(e)	100	0		EX_chtn(e)	99.976	0.315016		EX_gp1c_hs(e)	96.0514	9.33213		EX_co2(e)	98.0897	6.56002
EX_leuktrB4(e)	100		EX_leuktrA4(e)	100	0		EX_cit(e)	99.976	0.315016		EX_gp1calpha_hs(e)	96.0514	9.33213		EX_coumarin(e)	98.0897	6.56002
EX_leuktrC4(e)	100		EX_leuktrB4(e)	100	0		EX_cl(e)	99.976	0.315016		EX_gq1b_hs(e)	96.0514	9.33213		EX_crn(e)	98.0897	6.56002
EX_leuktrD4(e)	100		EX_leuktrC4(e)	100	0		EX_CLPND(e)	99.976	0.315016		EX_gq1balpha_hs(e)	96.0514	9.33213		EX_crtsl(e)	98.0897	6.56002
EX_leuktrE4(e)	100		EX_leuktrD4(e)	100	0		EX_cmp(e)	99.976	0.315016		EX_gsn(e)	96.0514	9.33213		EX_crtstrn(e)	98.0897	6.56002
EX_leuktrF4(e)	100		EX_leuktrE4(e)	100	0		EX_co(e)	99.976	0.315016		EX_gt1a_hs(e)	96.0514	9.33213		EX_crvnc(e)	98.0897	6.56002
EX_lgnc(e)	100		EX_leuktrF4(e)	100	0		EX_co2(e)	99.976	0.315016		EX_gthox(e)	96.0514	9.33213		EX_csn(e)	98.0897	6.56002
EX_lipoate(e)	100		EX_lgnc(e)	100	0		EX_coumarin(e)	99.976	0.315016		EX_gthrd(e)	96.0514	9.33213		EX_cspg_a(e)	98.0897	6.56002
EX_lneldc(e)	100		EX_lipoate(e)	100	0		EX_crn(e)	99.976	0.315016		EX_gtp(e)	96.0514	9.33213		EX_cspg_b(e)	98.0897	6.56002
EX_lnlc(e)	100		EX_lneldc(e)	100	0		EX_crtsl(e)	99.976	0.315016		EX_gua(e)	96.0514	9.33213		EX_cspg_c(e)	98.0897	6.56002
EX_lnlnca(e)	100		EX_lnlc(e)	100	0		EX_crtstrn(e)	99.976	0.315016		EX_h(e)	96.0514	9.33213		EX_cspg_d(e)	98.0897	6.56002
EX_lnlncg(e)	100		EX_lnlnca(e)	100	0		EX_crvnc(e)	99.976	0.315016		EX_h2o(e)	96.0514	9.33213		EX_cspg_e(e)	98.0897	6.56002
EX_lpchol_hs(e)	100		EX_lnlncg(e)	100	0		EX_csn(e)	99.976	0.315016		EX_h2o2(e)	96.0514	9.33213		EX_cyan(e)	98.0897	6.56002
EX_mag_hs(e)	100		EX_lpchol_hs(e)	100	0		EX_cspg_a(e)	99.976	0.315016		EX_ha_pre1(e)	96.0514	9.33213		EX_dag_hs(e)	98.0897	6.56002
EX_malt(e)	100		EX_mag_hs(e)	100	0		EX_cspg_b(e)	99.976	0.315016		EX_ha(e)	96.0514	9.33213		EX_dcsptn1(e)	98.0897	6.56002
EX_man(e)	100		EX_malt(e)	100	0		EX_cspg_c(e)	99.976	0.315016		EX_hco3(e)	96.0514	9.33213		EX_debrisoquine(e)	98.0897	6.56002
EX_meoh(e)	100		EX_man(e)	100	0		EX_cspg_d(e)	99.976	0.315016		EX_hcoumarin(e)	96.0514	9.33213		EX_dgchol(e)	98.0897	6.56002
EX_mepi(e)	100		EX_meoh(e)	100	0		EX_cspg_e(e)	99.976	0.315016		EX_hdca(e)	96.0514	9.33213		EX_dhdascb(e)	98.0897	6.56002
EX_mthgxl(e)	100		EX_mepi(e)	100	0		EX_cyan(e)	99.976	0.315016		EX_hdcea(e)	96.0514	9.33213		EX_dheas(e)	98.0897	6.56002
EX_n2m2nmasn(e)	100		EX_mthgxl(e)	100	0		EX_dag_hs(e)	99.976	0.315016		EX_hestratriol(e)	96.0514	9.33213		EX_dhf(e)	98.0897	6.56002
EX_na1(e)	100		EX_n2m2nmasn(e)	100	0		EX_dcsptn1(e)	99.976	0.315016		EX_hexc(e)	96.0514	9.33213		EX_digalsgalside_hs(e)	98.0897	6.56002
EX_nac(e)	100		EX_na1(e)	100	0		EX_debrisoquine(e)	99.976	0.315016		EX_hom-L(e)	96.0514	9.33213		EX_dlnlcg(e)	98.0897	6.56002
EX_nad(e)	100		EX_nac(e)	100	0		EX_dgchol(e)	99.976	0.315016		EX_hpdca(e)	96.0514	9.33213		EX_dmhptcrn(e)	98.0897	6.56002
EX_nadp(e)	100		EX_nad(e)	100	0		EX_dhdascb(e)	99.976	0.315016		EX_hspg(e)	96.0514	9.33213		EX_dopa(e)	98.0897	6.56002
EX_ncam(e)	100		EX_nadp(e)	100	0		EX_dheas(e)	99.976	0.315016		EX_hxan(e)	96.0514	9.33213		EX_dopasf(e)	98.0897	6.56002
EX_nh4(e)	100		EX_ncam(e)	100	0		EX_dhf(e)	99.976	0.315016		EX_i(e)	96.0514	9.33213		EX_drib(e)	98.0897	6.56002
EX_no(e)	100		EX_nh4(e)	100	0		EX_digalsgalside_hs(e)	99.976	0.315016		EX_idp(e)	96.0514	9.33213		EX_eaflatoxin(e)	98.0897	6.56002
EX_npthl(e)	100		EX_no(e)	100	0		EX_dlnlcg(e)	99.976	0.315016		EX_imp(e)	96.0514	9.33213		EX_ebastine(e)	98.0897	6.56002
EX_nrpphr(e)	100		EX_npthl(e)	100	0		EX_dmhptcrn(e)	99.976	0.315016		EX_inost(e)	96.0514	9.33213		EX_ebastineoh(e)	98.0897	6.56002
EX_nrpphrsf(e)	100		EX_nrpphr(e)	100	0		EX_dopa(e)	99.976	0.315016		EX_ins(e)	96.0514	9.33213		EX_eicostet(e)	98.0897	6.56002
EX_nrvnc(e)	100		EX_nrpphrsf(e)	100	0		EX_dopasf(e)	99.976	0.315016		EX_k(e)	96.0514	9.33213		EX_elaid(e)	98.0897	6.56002
EX_o2(e)	100		EX_nrvnc(e)	100	0		EX_drib(e)	99.976	0.315016		EX_ksi_deg1(e)	96.0514	9.33213		EX_estradiol(e)	98.0897	6.56002
EX_o2s(e)	100		EX_o2(e)	100	0		EX_eaflatoxin(e)	99.976	0.315016		EX_ksi(e)	96.0514	9.33213		EX_estradiolglc(e)	98.0897	6.56002
EX_oagd3_hs(e)	100		EX_o2s(e)	100	0		EX_ebastine(e)	99.976	0.315016		EX_ksii_core2(e)	96.0514	9.33213		EX_estriolglc(e)	98.0897	6.56002
EX_oagt3_hs(e)	100		EX_oagd3_hs(e)	100	0		EX_ebastineoh(e)	99.976	0.315016		EX_ksii_core4(e)	96.0514	9.33213		EX_estroneglc(e)	98.0897	6.56002
[truncated: 2,031 more rows]

## Sheet: ZIKV
			Enforcement using				Enforcement using				Enforcement using randomly generated BOFs using uniform				Enforcement using randomly generated BOFs using
[truncated: 3,394 more rows]
